# Supplementary material for: Leveraging health records to identify diagnoses associated with recurrent pregnancy loss across two medical centers
Source: iScience. 2026 Jan 7;29(2):114633. doi: 10.1016/j.isci.2026.114633 (PMC12877842; doi:10.1016/j.isci.2026.114633)
Supplement: Data S1. Concept lists for diagnoses in the inclusion and exclusion criteria [file mmc2.xlsx]

## Sheet: Recurrent pregnancy loss
concept_id	concept_name	domain_id	vocabulary_id	concept_code
40310701	(A/N care: recurrent aborter) or (recurrent aborter)	Condition	SNOMED	146811001
40356209	(A/N care: recurrent aborter) or (recurrent aborter)	Condition	SNOMED	268574009
4341829	Abortion, Habitual	Drug	NDFRT	N0000000269
43530904	Antenatal care for woman with history of recurrent miscarriage	Observation	SNOMED	609442008
4060240	Antenatal care: recurrent aborter	Condition	SNOMED	169580009
4060189	H/O: 2 miscarriages	Observation	SNOMED	161748007
4060190	H/O: 3 miscarriages	Observation	SNOMED	161749004
4060191	H/O: 4 miscarriages	Observation	SNOMED	161750004
4060192	H/O: 5 miscarriages	Observation	SNOMED	161751000
4059481	H/O: 6 miscarriages	Observation	SNOMED	161752007
40598107	Habitual aborter	Condition	SNOMED	54726000
45553464	Habitual aborter	Observation	ICD10	N96
3535760	Habitual aborter - unspecified	Condition	SNOMED	610341000000105
4058107	Habitual aborter - unspecified	Condition	SNOMED	199086002
3535761	Habitual aborter NOS	Condition	SNOMED	610351000000108
4058108	Habitual aborter NOS	Condition	SNOMED	199090000
40398661	Habitual aborter-not pregnant	Condition	SNOMED	198478002
37018878	High risk pregnancy due to recurrent pregnancy loss	Condition	SNOMED	134781000119106
441630	History of recurrent miscarriage - delivered	Condition	SNOMED	199087006
4062565	History of recurrent miscarriage - not delivered	Condition	SNOMED	199088001
432677	History of recurrent miscarriage - not pregnant	Condition	SNOMED	237036002
1571702	Pregnancy care for patient with recurrent pregnancy loss	Observation	ICD10CM	O26.2
45606551	Pregnancy care for patient with recurrent pregnancy loss, first trimester	Condition	ICD10CM	O26.21
45587296	Pregnancy care for patient with recurrent pregnancy loss, second trimester	Condition	ICD10CM	O26.22
45558218	Pregnancy care for patient with recurrent pregnancy loss, third trimester	Condition	ICD10CM	O26.23
45606550	Pregnancy care for patient with recurrent pregnancy loss, unspecified trimester	Condition	ICD10CM	O26.20
45558217	Pregnancy care of habitual aborter	Condition	ICD10	O26.2
438209	Pregnancy care of habitual aborter	Observation	SNOMED	199089009
40318677	Recurrent miscarriage	Condition	SNOMED	156126009
4011615	Recurrent miscarriage	Condition	SNOMED	102878001
44830216	Recurrent pregnancy loss	Condition	ICD9CM	646.3
35209496	Recurrent pregnancy loss	Condition	ICD10CM	N96
44834859	Recurrent pregnancy loss without current pregnancy	Condition	ICD9CM	629.81
44822088	Recurrent pregnancy loss, antepartum condition or complication	Condition	ICD9CM	646.33
44837239	Recurrent pregnancy loss, delivered, with or without mention of antepartum condition	Condition	ICD9CM	646.31
44822087	Recurrent pregnancy loss, unspecified as to episode of care or not applicable	Condition	ICD9CM	646.30

## Sheet: Pregnancy loss
concept_id	concept_name	domain_id	vocabulary_id	concept_code
40524863	[V]Single stillbirth	Observation	SNOMED	315959000
44795842	[V]Single stillbirth	Condition	SNOMED	410251000000102
40406338	[X]Fresh stillbirth	Condition	SNOMED	206582009
40515177	[X]Fresh stillbirth	Condition	SNOMED	309758001
3529111	[X]Fresh stillbirth	Condition	SNOMED	444181000000103
44798047	[X]Fresh stillbirth	Condition	SNOMED	438601000000109
3580525	[X]Macerated stillbirth	Condition	SNOMED	403041000000102
40406339	[X]Macerated stillbirth	Condition	SNOMED	206583004
40515178	[X]Macerated stillbirth	Condition	SNOMED	309759009
44800562	[X]Macerated stillbirth	Condition	SNOMED	478401000000108
4129846	Antepartum fetal death	Observation	SNOMED	237361005
762991	Antepartum fetal death with cessation of labor	Observation	SNOMED	434681000124104
762990	Antepartum fetal death with continued labor	Observation	SNOMED	434671000124102
3546886	Antepartum stillbirth	Condition	SNOMED	921601000000103
37017027	Antepartum stillbirth	Condition	SNOMED	713202001
45770031	Antepartum stillbirth	Condition	SNOMED	921591000000109
4028644	Biochemical pregnancy	Condition	SNOMED	237243004
40482050	Chemical pregnancy	Condition	SNOMED	445086005
439085	Complete inevitable miscarriage complicated by delayed or excessive hemorrhage	Condition	SNOMED	307735008
441629	Complete inevitable miscarriage complicated by embolism	Condition	SNOMED	307750004
441921	Complete inevitable miscarriage complicated by genital tract and pelvic infection	Condition	SNOMED	307734007
4146774	Complete inevitable miscarriage without complication	Condition	SNOMED	307738005
40318618	Complete miscarriage	Condition	SNOMED	156073000
441910	Complete miscarriage with damage to pelvic organs or tissues	Condition	SNOMED	198657009
432682	Complete miscarriage with delayed or excessive hemorrhage	Condition	SNOMED	198656000
441632	Complete miscarriage with embolism	Condition	SNOMED	198663000
435318	Complete miscarriage with genital tract or pelvic infection	Condition	SNOMED	198655001
435000	Complete miscarriage with metabolic disorder	Condition	SNOMED	198660002
436742	Complete miscarriage with renal failure	Condition	SNOMED	198659007
438805	Complete miscarriage with shock	Condition	SNOMED	198661003
45572749	Complete or unspecified spontaneous abortion with other complications	Condition	ICD10CM	O03.89
35209532	Complete or unspecified spontaneous abortion without complication	Condition	ICD10CM	O03.9
4113352	Complete spontaneous abortion NOS	Condition	SNOMED	198667004
3539959	Complete spontaneous abortion NOS	Condition	SNOMED	672481000000104
4114128	Complete spontaneous abortion with complication NOS	Condition	SNOMED	198665007
3539763	Complete spontaneous abortion with complication NOS	Condition	SNOMED	669831000000102
439687	Complete spontaneous abortion with no mention of complication	Condition	SNOMED	198666008
3519394	Complete spontaneous abortion with no mention of complication	Condition	SNOMED	529401000000105
4113968	Complete spontaneous abortion with other specified complication	Condition	SNOMED	198664006
3539762	Complete spontaneous abortion with other specified complication	Condition	SNOMED	669821000000104
40307702	Dilation of cervix uteri and curettage of uterus for removal of missed abortion	Procedure	SNOMED	149881007
4074867	Dilation of cervix uteri and curettage of uterus for removal of missed miscarriage	Procedure	SNOMED	176833006
4079844	Fetal death	Observation	SNOMED	276507005
4266873	Fetal Death	Drug	NDFRT	N0000001232
44801963	Fetal death before 24 weeks with retention of dead fetus	Condition	SNOMED	522101000000109
40492796	Fetal death due to anoxia	Observation	SNOMED	445868008
40492790	Fetal death due to asphyxia	Observation	SNOMED	445862009
40485992	Fetal death due to asphyxia during labor	Observation	SNOMED	446035009
40322971	Fetal death due to labor anoxia	Observation	SNOMED	157100009
4048142	Fetal death due to labor anoxia	Observation	SNOMED	206259008
40322970	Fetal death due to prelabor anoxia	Observation	SNOMED	157099001
4071603	Fetal death due to prelabor anoxia	Observation	SNOMED	206258000
442338	Fetal death from asphyxia AND/OR anoxia before onset of labor	Observation	SNOMED	44174001
443695	Fetal death from asphyxia AND/OR anoxia during labor	Observation	SNOMED	1762004
4073388	Fetal death from asphyxia AND/OR anoxia, not clear if noted before OR after onset of labor	Observation	SNOMED	17766007
44824594	Fetal death from asphyxia or anoxia before onset of labor or at unspecified time	Condition	ICD9CM	768.0
44837418	Fetal death from asphyxia or anoxia during labor	Condition	ICD9CM	768.1
45582632	Fetal death of unspecified cause	Observation	ICD10	P95
75605	Fetal death, affecting management of mother	Condition	SNOMED	14022007
4321536	Fetal demise from miscarriage	Condition	SNOMED	7000009
4034159	Fresh stillbirth	Condition	SNOMED	237365001
438211	Incomplete inevitable miscarriage complicated by delayed or excessive hemorrhage	Condition	SNOMED	307752007
436748	Incomplete inevitable miscarriage complicated by embolism	Condition	SNOMED	307746006
437618	Incomplete inevitable miscarriage complicated by genital tract and pelvic infection	Condition	SNOMED	307749004
4146775	Incomplete inevitable miscarriage without complication	Condition	SNOMED	307748007
434689	Incomplete miscarriage	Condition	SNOMED	16863000
40318617	Incomplete miscarriage	Condition	SNOMED	156072005
434413	Incomplete miscarriage with complication	Condition	SNOMED	413338003
437933	Incomplete miscarriage with damage to pelvic organs or tissues	Condition	SNOMED	198646004
440460	Incomplete miscarriage with delayed or excessive hemorrhage	Condition	SNOMED	198645000
437045	Incomplete miscarriage with embolism	Condition	SNOMED	198650006
195317	Incomplete miscarriage with genital tract or pelvic infection	Condition	SNOMED	198644001
432689	Incomplete miscarriage with metabolic disorder	Condition	SNOMED	198648003
439688	Incomplete miscarriage with renal failure	Condition	SNOMED	198647008
441631	Incomplete miscarriage with shock	Condition	SNOMED	198649006
42535215	Incomplete spontaneous abortion due to hemorrhage	Condition	SNOMED	16111000119105
3540903	Incomplete spontaneous abortion NOS	Condition	SNOMED	685541000000107
4147329	Incomplete spontaneous abortion NOS	Condition	SNOMED	267191002
4113685	Incomplete spontaneous abortion with complication NOS	Condition	SNOMED	198652003
3568618	Incomplete spontaneous abortion with complication NOS	Condition	SNOMED	669811000000105
433533	Incomplete spontaneous abortion with no mention of complication	Condition	SNOMED	198653008
3530798	Incomplete spontaneous abortion with no mention of complication	Condition	SNOMED	531531000000100
45563038	Incomplete spontaneous abortion with other complications	Condition	ICD10CM	O03.39
4113967	Incomplete spontaneous abortion with other specified complication	Condition	SNOMED	198651005
3567223	Incomplete spontaneous abortion with other specified complication	Condition	SNOMED	609111000000102
35209528	Incomplete spontaneous abortion without complication	Condition	ICD10CM	O03.4
40392527	Inevitable miscarriage	Condition	SNOMED	198639008
4244408	Inevitable miscarriage	Condition	SNOMED	59363009
4146772	Inevitable miscarriage complete	Condition	SNOMED	307733001
4146773	Inevitable miscarriage incomplete	Condition	SNOMED	307737000
3546887	Intrapartum stillbirth	Condition	SNOMED	921621000000107
45773593	Intrapartum stillbirth	Condition	SNOMED	921611000000101
40319152	Intrauterine fetal death	Condition	SNOMED	156184005
4059902	Intrauterine fetal death	Condition	SNOMED	199605001
4163996	Late fetal death affecting management of mother	Condition	SNOMED	399363000
4238207	Listeria miscarriage	Condition	SNOMED	57420002
4028787	Macerated stillbirth	Condition	SNOMED	237366000
45876808	Miscarriage	Meas Value	LOINC	LA14272-1
4067106	Miscarriage	Condition	SNOMED	17369002
4087102	Miscarriage at 8 to 28 weeks	Condition	SNOMED	184339009
44783770	Miscarriage care	Observation	SNOMED	697954007
3559027	Miscarriage care	Observation	SNOMED	806831000000104
44807497	Miscarriage care management	Procedure	SNOMED	806841000000108
42537952	Miscarriage care management	Procedure	SNOMED	737943000
44807496	Miscarriage care plan	Type Concept	SNOMED	806821000000101
42537191	Miscarriage care plan	Type Concept	SNOMED	736379008
192678	Miscarriage complicated by damage to pelvic organs and/or tissues	Condition	SNOMED	58990004
195594	Miscarriage complicated by delayed and/or excessive hemorrhage	Condition	SNOMED	2781009
194704	Miscarriage complicated by embolism	Condition	SNOMED	43306002
437920	Miscarriage complicated by genital-pelvic infection	Condition	SNOMED	373896005
441348	Miscarriage complicated by metabolic disorder	Condition	SNOMED	13384007
193820	Miscarriage complicated by renal failure	Condition	SNOMED	10697004
196746	Miscarriage complicated by shock	Condition	SNOMED	34270000
4323612	Miscarriage due to Brucella abortus	Condition	SNOMED	428508008
4178173	Miscarriage due to Brucella canis	Condition	SNOMED	428593008
4051244	Miscarriage due to Leptospira	Condition	SNOMED	16038004
4078393	Miscarriage in first trimester	Condition	SNOMED	19169002
4224646	Miscarriage in second trimester	Condition	SNOMED	85116003
4167685	Miscarriage in third trimester	Condition	SNOMED	48485000
44809051	Miscarriage inpatient care plan	Type Concept	SNOMED	851811000000106
42537157	Miscarriage inpatient care plan	Type Concept	SNOMED	736336006
43530979	Miscarriage of tubal ectopic pregnancy	Condition	SNOMED	609525000
3544968	Miscarriage surgical care management care plan	Type Concept	SNOMED	806971000000105
44809902	Miscarriage surgical management care plan	Type Concept	SNOMED	865741000000109
4224597	Miscarriage with acute necrosis of liver	Condition	SNOMED	40444006
4211863	Miscarriage with acute renal failure	Condition	SNOMED	57469000
4064536	Miscarriage with afibrinogenemia	Condition	SNOMED	21360006
4247270	Miscarriage with air embolism	Condition	SNOMED	60265009
4003276	Miscarriage with amniotic fluid embolism	Condition	SNOMED	10058006
4209126	Miscarriage with blood-clot embolism	Condition	SNOMED	55976003
4175137	Miscarriage with cardiac arrest and/or cardiac failure	Condition	SNOMED	48739004
4047775	Miscarriage with cerebral anoxia	Condition	SNOMED	12394009
434094	Miscarriage with complication	Condition	SNOMED	34614007
4179796	Miscarriage with defibrination syndrome	Condition	SNOMED	50770000
4274315	Miscarriage with electrolyte imbalance	Condition	SNOMED	64814003
4149423	Miscarriage with endometritis	Condition	SNOMED	30806007
4278107	Miscarriage with fat embolism	Condition	SNOMED	66131005
4170457	Miscarriage with heavy bleeding	Condition	SNOMED	275421004
4180568	Miscarriage with intravascular hemolysis	Condition	SNOMED	53183006
4194113	Miscarriage with laceration of bladder	Condition	SNOMED	39199000
4041728	Miscarriage with laceration of bowel	Condition	SNOMED	16714009
4309780	Miscarriage with laceration of broad ligament	Condition	SNOMED	85331004
4130670	Miscarriage with laceration of cervix	Condition	SNOMED	127009
4261327	Miscarriage with laceration of periurethral tissue	Condition	SNOMED	44814008
4302162	Miscarriage with laceration of uterus	Condition	SNOMED	7809009
4311698	Miscarriage with laceration of vagina	Condition	SNOMED	85632001
4217670	Miscarriage with oliguria	Condition	SNOMED	72613009
4221853	Miscarriage with parametritis	Condition	SNOMED	83922009
4313166	Miscarriage with pelvic peritonitis	Condition	SNOMED	85991008
4310654	Miscarriage with perforation of bladder	Condition	SNOMED	85467007
4216342	Miscarriage with perforation of bowel	Condition	SNOMED	8071005
4031837	Miscarriage with perforation of broad ligament	Condition	SNOMED	14136000
4253804	Miscarriage with perforation of cervix	Condition	SNOMED	74369005
4200070	Miscarriage with perforation of periurethral tissue	Condition	SNOMED	51954003
4049891	Miscarriage with perforation of uterus	Condition	SNOMED	15809008
4339107	Miscarriage with perforation of vagina	Condition	SNOMED	87967003
4168445	Miscarriage with postoperative shock	Condition	SNOMED	47537002
4219469	Miscarriage with pulmonary embolism	Condition	SNOMED	82153002
4206899	Miscarriage with pyemic embolism	Condition	SNOMED	56113006
4001856	Miscarriage with renal tubular necrosis	Condition	SNOMED	11026009
4195406	Miscarriage with salpingitis	Condition	SNOMED	7910003
4189350	Miscarriage with salpingo-oophoritis	Condition	SNOMED	61568004
4285746	Miscarriage with sepsis	Condition	SNOMED	67465009
4244261	Miscarriage with septic embolism	Condition	SNOMED	59204004
4085627	Miscarriage with septic shock	Condition	SNOMED	18613002
4189550	Miscarriage with septicemia	Condition	SNOMED	61636002
4224903	Miscarriage with soap embolism	Condition	SNOMED	40516008
4006806	Miscarriage with uremia	Condition	SNOMED	11109001
4033096	Miscarriage with urinary tract infection	Condition	SNOMED	1469007
436176	Miscarriage without complication	Condition	SNOMED	23793007
45567878	Missed abortion	Observation	ICD10	O02.1
40318633	Missed abortion	Condition	SNOMED	156087000
44837213	Missed abortion	Condition	ICD9CM	632
40358054	Missed abortion	Condition	SNOMED	267187007
40392502	Missed abortion	Condition	SNOMED	198616002
35209522	Missed abortion	Condition	ICD10CM	O02.1
76482	Missed miscarriage	Condition	SNOMED	16607004
4266998	Mycotic miscarriage	Condition	SNOMED	6176008
3559028	Notification of miscarriage	Observation	SNOMED	806851000000106
42872817	Notification of miscarriage	Observation	SNOMED	450810001
44833083	Outcome of delivery, single stillborn	Condition	ICD9CM	V27.1
45757198	Sepsis due to incomplete miscarriage	Condition	SNOMED	10812001000119100
40311790	Single stillbirth	Condition	SNOMED	147058004
45571347	Single stillbirth	Observation	ICD10	Z37.1
4014454	Single stillbirth	Condition	SNOMED	169827000
35225109	Single stillbirth	Condition	ICD10CM	Z37.1
45592170	Spontaneous abortion	Observation	ICD10	O03
44823217	Spontaneous abortion	Condition	ICD9CM	634
1571605	Spontaneous abortion	Condition	ICD10CM	O03
44823219	Spontaneous abortion complicated by damage to pelvic organs or tissues	Condition	ICD9CM	634.2
44833696	Spontaneous abortion complicated by delayed or excessive hemorrhage	Condition	ICD9CM	634.1
44823220	Spontaneous abortion complicated by embolism	Condition	ICD9CM	634.6
44824371	Spontaneous abortion complicated by genital tract and pelvic infection	Condition	ICD9CM	634.0
40290354	Spontaneous abortion complicated by genital-pelvic infection	Condition	SNOMED	12855004
44827918	Spontaneous abortion complicated by metabolic disorder	Condition	ICD9CM	634.4
44831363	Spontaneous abortion complicated by renal failure	Condition	ICD9CM	634.3
44832508	Spontaneous abortion complicated by shock	Condition	ICD9CM	634.5
4113969	Spontaneous abortion NOS	Condition	SNOMED	198689000
40318619	Spontaneous abortion NOS	Condition	SNOMED	156074006
3539764	Spontaneous abortion NOS	Condition	SNOMED	669841000000106
4113683	Spontaneous abortion unspecified	Condition	SNOMED	198631006
3536413	Spontaneous abortion unspecified	Condition	SNOMED	620001000000102
44825574	Spontaneous abortion with other specified complications	Condition	ICD9CM	634.7
40444320	Spontaneous abortion with sepsis	Condition	SNOMED	237255005
40618989	Spontaneous abortion with specified complication, NEC	Condition	SNOMED	71698004
44822065	Spontaneous abortion with unspecified complication	Condition	ICD9CM	634.8
44822066	Spontaneous abortion without mention of complication	Condition	ICD9CM	634.9
45582436	Spontaneous abortion, complete or unspecified, complicated by delayed or excessive hemorrhage	Observation	ICD10	O03.6
45587265	Spontaneous abortion, complete or unspecified, complicated by embolism	Observation	ICD10	O03.7
45572747	Spontaneous abortion, complete or unspecified, complicated by genital tract and pelvic infection	Observation	ICD10	O03.5
45553467	Spontaneous abortion, complete or unspecified, with other and unspecified complications	Observation	ICD10	O03.8
45563040	Spontaneous abortion, complete or unspecified, without complication	Observation	ICD10	O03.9
44827917	Spontaneous abortion, complicated by damage to pelvic organs or tissues, complete	Condition	ICD9CM	634.22
44824372	Spontaneous abortion, complicated by damage to pelvic organs or tissues, incomplete	Condition	ICD9CM	634.21
44821008	Spontaneous abortion, complicated by damage to pelvic organs or tissues, unspecified	Condition	ICD9CM	634.20
44826758	Spontaneous abortion, complicated by delayed or excessive hemorrhage, complete	Condition	ICD9CM	634.12
44830200	Spontaneous abortion, complicated by delayed or excessive hemorrhage, incomplete	Condition	ICD9CM	634.11
44830199	Spontaneous abortion, complicated by delayed or excessive hemorrhage, unspecified	Condition	ICD9CM	634.10
44827919	Spontaneous abortion, complicated by embolism, complete	Condition	ICD9CM	634.62
44836066	Spontaneous abortion, complicated by embolism, incomplete	Condition	ICD9CM	634.61
44832509	Spontaneous abortion, complicated by embolism, unspecified	Condition	ICD9CM	634.60
44832507	Spontaneous abortion, complicated by genital tract and pelvic infection, complete	Condition	ICD9CM	634.02
44823218	Spontaneous abortion, complicated by genital tract and pelvic infection, incomplete	Condition	ICD9CM	634.01
44825572	Spontaneous abortion, complicated by genital tract and pelvic infection, unspecified	Condition	ICD9CM	634.00
44821010	Spontaneous abortion, complicated by metabolic disorder, complete	Condition	ICD9CM	634.42
44830201	Spontaneous abortion, complicated by metabolic disorder, incomplete	Condition	ICD9CM	634.41
44821009	Spontaneous abortion, complicated by metabolic disorder, unspecified	Condition	ICD9CM	634.40
44836064	Spontaneous abortion, complicated by renal failure, complete	Condition	ICD9CM	634.32
44826759	Spontaneous abortion, complicated by renal failure, incomplete	Condition	ICD9CM	634.31
44825573	Spontaneous abortion, complicated by renal failure, unspecified	Condition	ICD9CM	634.30
44824373	Spontaneous abortion, complicated by shock, complete	Condition	ICD9CM	634.52
44821011	Spontaneous abortion, complicated by shock, incomplete	Condition	ICD9CM	634.51
44836065	Spontaneous abortion, complicated by shock, unspecified	Condition	ICD9CM	634.50
45548687	Spontaneous abortion, incomplete, complicated by delayed or excessive hemorrhage	Observation	ICD10	O03.1
45534155	Spontaneous abortion, incomplete, complicated by embolism	Observation	ICD10	O03.2
45596896	Spontaneous abortion, incomplete, complicated by genital tract and pelvic infection	Observation	ICD10	O03.0
45558185	Spontaneous abortion, incomplete, without complication	Observation	ICD10	O03.4
44824374	Spontaneous abortion, with other specified complications, complete	Condition	ICD9CM	634.72
44826760	Spontaneous abortion, with other specified complications, incomplete	Condition	ICD9CM	634.71
44833697	Spontaneous abortion, with other specified complications, unspecified	Condition	ICD9CM	634.70
44833698	Spontaneous abortion, with unspecified complication, complete	Condition	ICD9CM	634.82
44826761	Spontaneous abortion, with unspecified complication, incomplete	Condition	ICD9CM	634.81
44823221	Spontaneous abortion, with unspecified complication, unspecified	Condition	ICD9CM	634.80
44831364	Spontaneous abortion, without mention of complication, complete	Condition	ICD9CM	634.92
44826762	Spontaneous abortion, without mention of complication, incomplete	Condition	ICD9CM	634.91
44822067	Spontaneous abortion, without mention of complication, unspecified	Condition	ICD9CM	634.90
40392521	Spontaneous abortion: [unspecified with delayed hemorrhage] or [heavy bleeding]	Condition	SNOMED	198633009
40392520	Spontaneous abortion: [unspecified with genital or pelvic infection] or [with sepsis]	Condition	SNOMED	198632004
443213	Stillbirth	Condition	SNOMED	237364002
40406337	Stillbirth	Condition	SNOMED	206581002
45882030	Stillbirth	Meas Value	LOINC	LA14667-2
45893353	Stillbirth	Drug	NDFRT	N0000191034
40629514	Stillbirth	Observation	SNOMED	76358005
35210683	Stillbirth	Condition	ICD10CM	P95
443463	Stillbirth - unknown if fetal death intrapartum or prior to labor	Condition	SNOMED	408796008
3573308	Stillbirth NEC	Condition	SNOMED	627281000000104
4345683	Stillbirth NEC	Condition	SNOMED	240296009
4287409	Stillbirth of immature female (500-999 gms.)	Condition	SNOMED	68509000
4217655	Stillbirth of immature fetus, sex undetermined (500-999 gms.)	Condition	SNOMED	72543004
4261819	Stillbirth of immature male (500-999 gms.)	Condition	SNOMED	35608009
4321563	Stillbirth of mature female (2500 gms. or more)	Condition	SNOMED	70112005
4301269	Stillbirth of mature male (2500 gms. or more)	Condition	SNOMED	7860005
4103876	Stillbirth of premature female (1000-2499 gms.)	Condition	SNOMED	28996007
4300979	Stillbirth of premature male (1000-2499 gms.)	Condition	SNOMED	77814006
45881966	Stillborn	Meas Value	LOINC	LA14271-3
4269081	Surgical treatment of miscarriage of any trimester	Procedure	SNOMED	62688006
4087135	Surgical treatment of missed miscarriage of first trimester	Procedure	SNOMED	18489003
4202200	Surgical treatment of missed miscarriage of second trimester	Procedure	SNOMED	5191001
4290406	Surgical treatment of missed miscarriage of third trimester	Procedure	SNOMED	69621003
36310132	Syphilitic stillbirth	Meas Value	LOINC	LA21245-8
45888020	Treatment of missed abortion, completed surgically	Procedure	CPT4	1009005
2110326	Treatment of missed abortion, completed surgically; first trimester	Procedure	CPT4	59820
2110327	Treatment of missed abortion, completed surgically; second trimester	Procedure	CPT4	59821
4241830	Undelivered in utero fetal death	Condition	SNOMED	59291004
4113850	Unspecified spontaneous abortion NOS	Condition	SNOMED	198643007
3539956	Unspecified spontaneous abortion NOS	Condition	SNOMED	672451000000105
4113351	Unspecified spontaneous abortion with complication NOS	Condition	SNOMED	198641009
3520817	Unspecified spontaneous abortion with complication NOS	Condition	SNOMED	650801000000107
4113684	Unspecified spontaneous abortion with damage to pelvic organs or tissues	Condition	SNOMED	198634003
3537971	Unspecified spontaneous abortion with damage to pelvic organs or tissues	Condition	SNOMED	642911000000100
3540902	Unspecified spontaneous abortion with delayed or excessive haemorrhage	Condition	SNOMED	685531000000103
4143072	Unspecified spontaneous abortion with delayed or excessive hemorrhage	Condition	SNOMED	267189005
4113350	Unspecified spontaneous abortion with embolism	Condition	SNOMED	198638000
3538527	Unspecified spontaneous abortion with embolism	Condition	SNOMED	650781000000106
3540284	Unspecified spontaneous abortion with genital tract or pelvic infection	Condition	SNOMED	677041000000102
4143071	Unspecified spontaneous abortion with genital tract or pelvic infection	Condition	SNOMED	267188002
4113220	Unspecified spontaneous abortion with metabolic disorder	Condition	SNOMED	198636001
3537801	Unspecified spontaneous abortion with metabolic disorder	Condition	SNOMED	640491000000100
4113849	Unspecified spontaneous abortion with other specified complication	Condition	SNOMED	198640005
3538528	Unspecified spontaneous abortion with other specified complication	Condition	SNOMED	650791000000108
4113848	Unspecified spontaneous abortion with renal failure	Condition	SNOMED	198635002
3537972	Unspecified spontaneous abortion with renal failure	Condition	SNOMED	642921000000106
4113349	Unspecified spontaneous abortion with shock	Condition	SNOMED	198637005
3537802	Unspecified spontaneous abortion with shock	Condition	SNOMED	640501000000106
4112954	Unspecified spontaneous abortion without mention of complication	Condition	SNOMED	198642002
3538529	Unspecified spontaneous abortion without mention of complication	Condition	SNOMED	650811000000109

## Sheet: History of pregnancy loss
concept_id	concept_name	domain_id	vocabulary_id	concept_code
40310703	A/N care: H/O stillbirth	Observation	SNOMED	146813003
43530904	Antenatal care for woman with history of recurrent miscarriage	Observation	SNOMED	609442008
4060241	Antenatal care: history of stillbirth	Observation	SNOMED	169582001
4058553	H/O: 1 miscarriage	Observation	SNOMED	161747002
4060189	H/O: 2 miscarriages	Observation	SNOMED	161748007
4060190	H/O: 3 miscarriages	Observation	SNOMED	161749004
4060191	H/O: 4 miscarriages	Observation	SNOMED	161750004
4060192	H/O: 5 miscarriages	Observation	SNOMED	161751000
4059481	H/O: 6 miscarriages	Observation	SNOMED	161752007
40303215	H/O: miscarriage	Observation	SNOMED	139017001
4060188	H/O: miscarriage	Observation	SNOMED	161744009
3533659	H/O: miscarriage NOS	Observation	SNOMED	577171000000104
4059482	H/O: miscarriage NOS	Observation	SNOMED	161753002
40303214	H/O: stillbirth	Observation	SNOMED	139016005
4059480	H/O: stillbirth	Observation	SNOMED	161743003
37109041	History of intrauterine fetal death	Observation	SNOMED	16216731000119106
42539246	History of pregnancy loss in non-pregnant woman	Observation	SNOMED	15011000119104
441630	History of recurrent miscarriage - delivered	Condition	SNOMED	199087006
4062565	History of recurrent miscarriage - not delivered	Condition	SNOMED	199088001
432677	History of recurrent miscarriage - not pregnant	Condition	SNOMED	237036002

## Sheet: Live-birth
concept_id	concept_name	domain_id	vocabulary_id	concept_code
44794548	[V]Single live birth	Condition	SNOMED	398211000000108
40524862	[V]Single live birth	Observation	SNOMED	315958008
4216797	Born by normal vaginal delivery	Observation	SNOMED	395683001
40572106	Born by normal vaginal delivery	Observation	SNOMED	395562004
40572157	Born by normal vaginal delivery	Observation	SNOMED	395608008
441641	Delivery normal	Condition	SNOMED	48782003
40359641	Delivery normal	Condition	SNOMED	281686002
40394469	Delivery normal	Condition	SNOMED	200477006
40396138	Delivery: [normal in a completely normal case] or [spontaneous vaginal]	Condition	SNOMED	199313007
35210362	Encounter for full-term uncomplicated delivery	Condition	ICD10CM	O80
45883764	Live birth	Meas Value	LOINC	LA14270-5
4092289	Livebirth	Condition	SNOMED	281050002
40311488	Manually assisted vaginal delivery	Procedure	SNOMED	150699004
42539267	Multiple liveborn in hospital by vaginal delivery	Observation	SNOMED	16089691000119102
4014720	Normal birth	Condition	SNOMED	169961004
44824408	Normal delivery	Condition	ICD9CM	650
32587	Normal Delivery	Visit	UB04 Point of Origin	N
4118903	Normal delivery - occipitoanterior	Condition	SNOMED	288209009
40319228	Normal delivery (& [occipitoanterior])	Condition	SNOMED	156252009
40358596	Normal delivery (& [occipitoanterior])	Procedure	SNOMED	267353009
3535549	Normal delivery in completely normal case NOS	Condition	SNOMED	607451000000104
4063161	Normal delivery in completely normal case NOS	Condition	SNOMED	199315000
4071634	Normal delivery NOS	Procedure	SNOMED	177187009
3539415	Normal delivery NOS	Procedure	SNOMED	664411000000109
4071507	Normal delivery procedure	Procedure	SNOMED	177184002
40322567	Normal delivery procedure	Procedure	SNOMED	151322004
45590720	Other multiple liveborn infant, delivered vaginally	Condition	ICD10CM	Z38.68
4071633	Other specified normal delivery	Procedure	SNOMED	177186000
3539414	Other specified normal delivery	Procedure	SNOMED	664401000000107
45605123	Quadruplet liveborn infant, delivered vaginally	Condition	ICD10CM	Z38.63
45590719	Quintuplet liveborn infant, delivered vaginally	Condition	ICD10CM	Z38.65
4014295	Single live birth	Condition	SNOMED	169826009
40311789	Single live birth	Condition	SNOMED	147057009
35225108	Single live birth	Condition	ICD10CM	Z37.0
36713074	Single liveborn born in hospital by vaginal delivery	Observation	SNOMED	17561000119102
45552080	Single liveborn infant, delivered vaginally	Condition	ICD10CM	Z38.00
40322566	Supervision - normal delivery	Procedure	SNOMED	151321006
4121923	Supervision - normal delivery	Procedure	SNOMED	288193006
4227728	Term birth of fraternal twins, both living	Condition	SNOMED	87662006
4049333	Term birth of identical twins, both living	Condition	SNOMED	15467003
4066292	Term birth of multiple newborns	Condition	SNOMED	17333005
4054968	Term birth of newborn	Condition	SNOMED	21243004
4246654	Term birth of newborn female	Condition	SNOMED	9343003
4052512	Term birth of newborn male	Condition	SNOMED	21127004
4193224	Term birth of newborn quadruplets	Condition	SNOMED	7888004
4336090	Term birth of newborn quintuplets	Condition	SNOMED	86803008
4199146	Term birth of newborn sextuplets	Condition	SNOMED	52483005
4307237	Term birth of newborn triplets	Condition	SNOMED	8333008
4178275	Term birth of newborn twins	Condition	SNOMED	50758004
4127705	Term pregnancy delivered	Condition	SNOMED	23667007
45537632	Triplet liveborn infant, delivered vaginally	Condition	ICD10CM	Z38.61
42535052	Twin live born in hospital by vaginal delivery	Condition	SNOMED	151441000119105
45566425	Twin liveborn infant, delivered vaginally	Condition	ICD10CM	Z38.30
4125611	Vaginal delivery	Condition	SNOMED	289259007
646371483	Vaginal delivery	APR-DRG	APR-DRG	560
44784097	Vaginal delivery of fetus	Procedure	SNOMED	700000006
2110308	Vaginal delivery only (with or without episiotomy and/or forceps)	Procedure	CPT4	59409
45887987	Vaginal delivery only (with or without episiotomy and/or forceps)	Procedure	CPT4	1014217
2110309	Vaginal delivery only (with or without episiotomy and/or forceps); including postpartum care	Procedure	CPT4	59410
38001492	Vaginal delivery w/o complicating diagnoses	Observation	DRG	775
38000671	Vaginal Delivery without Complicating Diagnoses	Observation	DRG	373
4331179	Vaginal delivery, medical personnel present	Procedure	SNOMED	22633006

## Sheet: Preterm birth labor rupture
concept_id	concept_name	domain_id	vocabulary_id	concept_code
40480278	High risk pregnancy due to history of preterm labor	Condition	SNOMED	444661007
42539228	History of preterm premature rupture of membranes	Observation	SNOMED	108951000119100
44836607	Personal history of pre-term labor	Observation	ICD9CM	V13.21
45581083	Personal history of pre-term labor	Observation	ICD10CM	Z87.51
44821530	Pregnancy with history of pre-term labor	Condition	ICD9CM	V23.41
45539187	Preterm delivery	Observation	ICD10	O60
37110284	Preterm delivery following Cesarean section	Condition	SNOMED	724489002
37110283	Preterm delivery following induction of labor	Condition	SNOMED	724488005
45755608	Preterm delivery without spontaneous labor	Observation	ICD10	O60.3
646371485	Preterm labor	APR-DRG	APR-DRG	563
1571847	Preterm labor	Condition	ICD10CM	O60
45757175	Preterm labor in second trimester with preterm delivery in second trimester	Condition	SNOMED	10761141000119107
45757176	Preterm labor in third trimester with preterm delivery in third trimester	Condition	SNOMED	10761191000119104
10141	Preterm labor second trimester with preterm delivery second trimester	Condition	ICD10CM	O60.12
45577648	Preterm labor second trimester with preterm delivery second trimester, fetus 1	Condition	ICD10CM	O60.12X1
45553579	Preterm labor second trimester with preterm delivery second trimester, fetus 2	Condition	ICD10CM	O60.12X2
45587373	Preterm labor second trimester with preterm delivery second trimester, fetus 3	Condition	ICD10CM	O60.12X3
45597012	Preterm labor second trimester with preterm delivery second trimester, fetus 4	Condition	ICD10CM	O60.12X4
45563153	Preterm labor second trimester with preterm delivery second trimester, fetus 5	Condition	ICD10CM	O60.12X5
45606635	Preterm labor second trimester with preterm delivery second trimester, not applicable or unspecified	Condition	ICD10CM	O60.12X0
45548810	Preterm labor second trimester with preterm delivery second trimester, other fetus	Condition	ICD10CM	O60.12X9
10142	Preterm labor second trimester with preterm delivery third trimester	Condition	ICD10CM	O60.13
45534285	Preterm labor second trimester with preterm delivery third trimester, fetus 1	Condition	ICD10CM	O60.13X1
45534286	Preterm labor second trimester with preterm delivery third trimester, fetus 2	Condition	ICD10CM	O60.13X2
45577649	Preterm labor second trimester with preterm delivery third trimester, fetus 3	Condition	ICD10CM	O60.13X3
45592271	Preterm labor second trimester with preterm delivery third trimester, fetus 4	Condition	ICD10CM	O60.13X4
45606636	Preterm labor second trimester with preterm delivery third trimester, fetus 5	Condition	ICD10CM	O60.13X5
45582558	Preterm labor second trimester with preterm delivery third trimester, not applicable or unspecified	Condition	ICD10CM	O60.13X0
45592272	Preterm labor second trimester with preterm delivery third trimester, other fetus	Condition	ICD10CM	O60.13X9
10143	Preterm labor third trimester with preterm delivery third trimester	Condition	ICD10CM	O60.14
45544006	Preterm labor third trimester with preterm delivery third trimester, fetus 1	Condition	ICD10CM	O60.14X1
45544007	Preterm labor third trimester with preterm delivery third trimester, fetus 2	Condition	ICD10CM	O60.14X2
45567978	Preterm labor third trimester with preterm delivery third trimester, fetus 3	Condition	ICD10CM	O60.14X3
45563154	Preterm labor third trimester with preterm delivery third trimester, fetus 4	Condition	ICD10CM	O60.14X4
45597013	Preterm labor third trimester with preterm delivery third trimester, fetus 5	Condition	ICD10CM	O60.14X5
45553580	Preterm labor third trimester with preterm delivery third trimester, not applicable or unspecified	Condition	ICD10CM	O60.14X0
45539188	Preterm labor third trimester with preterm delivery third trimester, other fetus	Condition	ICD10CM	O60.14X9
36712702	Preterm labor with preterm delivery	Condition	SNOMED	10761241000119104
45601874	Preterm labor with preterm delivery	Observation	ICD10	O60.1
1571849	Preterm labor with preterm delivery	Condition	ICD10CM	O60.1
10140	Preterm labor with preterm delivery, unspecified trimester	Condition	ICD10CM	O60.10
45572863	Preterm labor with preterm delivery, unspecified trimester, fetus 1	Condition	ICD10CM	O60.10X1
45572864	Preterm labor with preterm delivery, unspecified trimester, fetus 2	Condition	ICD10CM	O60.10X2
45572865	Preterm labor with preterm delivery, unspecified trimester, fetus 3	Condition	ICD10CM	O60.10X3
45572866	Preterm labor with preterm delivery, unspecified trimester, fetus 4	Condition	ICD10CM	O60.10X4
45601875	Preterm labor with preterm delivery, unspecified trimester, fetus 5	Condition	ICD10CM	O60.10X5
45587372	Preterm labor with preterm delivery, unspecified trimester, not applicable or unspecified	Condition	ICD10CM	O60.10X0
45553578	Preterm labor with preterm delivery, unspecified trimester, other fetus	Condition	ICD10CM	O60.10X9
45534287	Preterm labor with term delivery	Observation	ICD10	O60.2
36712703	Preterm labor without delivery	Condition	SNOMED	10761341000119105
45601873	Preterm labor without delivery	Observation	ICD10	O60.0
1571848	Preterm labor without delivery	Condition	ICD10CM	O60.0
45563152	Preterm labor without delivery, second trimester	Condition	ICD10CM	O60.02
45567977	Preterm labor without delivery, third trimester	Condition	ICD10CM	O60.03
45563151	Preterm labor without delivery, unspecified trimester	Condition	ICD10CM	O60.00
4208215	Preterm premature rupture of membranes	Condition	SNOMED	312974005
45757148	Preterm premature rupture of membranes with onset of labor later than 24 hours after rupture	Condition	SNOMED	10759611000119105
45757149	Preterm premature rupture of membranes with onset of labor unknown	Condition	SNOMED	10759661000119108
45770893	Preterm premature rupture of membranes with onset of labor within 24 hours of rupture	Condition	SNOMED	10759711000119103
1571810	Preterm premature rupture of membranes, onset of labor more than 24 hours following rupture	Condition	ICD10CM	O42.11
45534270	Preterm premature rupture of membranes, onset of labor more than 24 hours following rupture, first trimester	Condition	ICD10CM	O42.111
45577639	Preterm premature rupture of membranes, onset of labor more than 24 hours following rupture, second trimester	Condition	ICD10CM	O42.112
45558305	Preterm premature rupture of membranes, onset of labor more than 24 hours following rupture, third trimester	Condition	ICD10CM	O42.113
45582550	Preterm premature rupture of membranes, onset of labor more than 24 hours following rupture, unspecified trimester	Condition	ICD10CM	O42.119
1571808	Preterm premature rupture of membranes, onset of labor within 24 hours of rupture	Condition	ICD10CM	O42.01
45582549	Preterm premature rupture of membranes, onset of labor within 24 hours of rupture, first trimester	Condition	ICD10CM	O42.011
45572855	Preterm premature rupture of membranes, onset of labor within 24 hours of rupture, second trimester	Condition	ICD10CM	O42.012
45592261	Preterm premature rupture of membranes, onset of labor within 24 hours of rupture, third trimester	Condition	ICD10CM	O42.013
45597004	Preterm premature rupture of membranes, onset of labor within 24 hours of rupture, unspecified trimester	Condition	ICD10CM	O42.019
1571812	Preterm premature rupture of membranes, unspecified as to length of time between rupture and onset of labor	Condition	ICD10CM	O42.91
45553560	Preterm premature rupture of membranes, unspecified as to length of time between rupture and onset of labor, first trimester	Condition	ICD10CM	O42.911
45567973	Preterm premature rupture of membranes, unspecified as to length of time between rupture and onset of labor, second trimester	Condition	ICD10CM	O42.912
45544003	Preterm premature rupture of membranes, unspecified as to length of time between rupture and onset of labor, third trimester	Condition	ICD10CM	O42.913
45558307	Preterm premature rupture of membranes, unspecified as to length of time between rupture and onset of labor, unspecified trimester	Condition	ICD10CM	O42.919
4034090	Preterm rupture of membranes	Condition	SNOMED	237266003
44784550	Preterm spontaneous labor with preterm delivery	Condition	SNOMED	698716002
44784551	Preterm spontaneous labor with term delivery	Condition	SNOMED	698717006
45877938	Previous preterm birth	Meas Value	LOINC	LA20055-2
37079065	Spontaneous preterm delivery (<37 weeks)	Meas Value	LOINC	LA29619-6
1571618	Supervision of pregnancy with history of pre-term labor	Condition	ICD10CM	O09.21
45572757	Supervision of pregnancy with history of pre-term labor, first trimester	Condition	ICD10CM	O09.211
45592178	Supervision of pregnancy with history of pre-term labor, second trimester	Condition	ICD10CM	O09.212
45587274	Supervision of pregnancy with history of pre-term labor, third trimester	Condition	ICD10CM	O09.213
45572758	Supervision of pregnancy with history of pre-term labor, unspecified trimester	Condition	ICD10CM	O09.219
1571850	Term delivery with preterm labor	Condition	ICD10CM	O60.2
10145	Term delivery with preterm labor, second trimester	Condition	ICD10CM	O60.22
45553581	Term delivery with preterm labor, second trimester, fetus 1	Condition	ICD10CM	O60.22X1
45577650	Term delivery with preterm labor, second trimester, fetus 2	Condition	ICD10CM	O60.22X2
45544008	Term delivery with preterm labor, second trimester, fetus 3	Condition	ICD10CM	O60.22X3
45597015	Term delivery with preterm labor, second trimester, fetus 4	Condition	ICD10CM	O60.22X4
45558318	Term delivery with preterm labor, second trimester, fetus 5	Condition	ICD10CM	O60.22X5
45592274	Term delivery with preterm labor, second trimester, not applicable or unspecified	Condition	ICD10CM	O60.22X0
45544009	Term delivery with preterm labor, second trimester, other fetus	Condition	ICD10CM	O60.22X9
10146	Term delivery with preterm labor, third trimester	Condition	ICD10CM	O60.23
45597016	Term delivery with preterm labor, third trimester, fetus 1	Condition	ICD10CM	O60.23X1
45539189	Term delivery with preterm labor, third trimester, fetus 2	Condition	ICD10CM	O60.23X2
45544010	Term delivery with preterm labor, third trimester, fetus 3	Condition	ICD10CM	O60.23X3
45572868	Term delivery with preterm labor, third trimester, fetus 4	Condition	ICD10CM	O60.23X4
45534288	Term delivery with preterm labor, third trimester, fetus 5	Condition	ICD10CM	O60.23X5
45601877	Term delivery with preterm labor, third trimester, not applicable or unspecified	Condition	ICD10CM	O60.23X0
45563156	Term delivery with preterm labor, third trimester, other fetus	Condition	ICD10CM	O60.23X9
10144	Term delivery with preterm labor, unspecified trimester	Condition	ICD10CM	O60.20
45597014	Term delivery with preterm labor, unspecified trimester, fetus 1	Condition	ICD10CM	O60.20X1
45548811	Term delivery with preterm labor, unspecified trimester, fetus 2	Condition	ICD10CM	O60.20X2
45592273	Term delivery with preterm labor, unspecified trimester, fetus 3	Condition	ICD10CM	O60.20X3
45572867	Term delivery with preterm labor, unspecified trimester, fetus 4	Condition	ICD10CM	O60.20X4
45548812	Term delivery with preterm labor, unspecified trimester, fetus 5	Condition	ICD10CM	O60.20X5
45601876	Term delivery with preterm labor, unspecified trimester, not applicable or unspecified	Condition	ICD10CM	O60.20X0
45563155	Term delivery with preterm labor, unspecified trimester, other fetus	Condition	ICD10CM	O60.20X9

## Sheet: Multiple gestation with loss
concept_id	concept_name	domain_id	vocabulary_id	concept_code
40524870	[V]Other multiple birth, all stillborn	Observation	SNOMED	315965000
44798432	[V]Other multiple birth, all stillborn	Observation	SNOMED	441811000000103
40525304	[V]Other multiple birth, born before admission to hospital, mates live and stillborn	Observation	SNOMED	316020004
44797403	[V]Other multiple birth, born before admission to hospital, mates live and stillborn	Condition	SNOMED	431471000000109
40525297	[V]Other multiple birth, born before admission to hospital, mates stillborn	Observation	SNOMED	316014000
44799838	[V]Other multiple birth, born before admission to hospital, mates stillborn	Condition	SNOMED	453631000000109
40525301	[V]Other multiple birth, born in hospital, mates live and stillborn	Observation	SNOMED	316018002
44798578	[V]Other multiple birth, born in hospital, mates live and stillborn	Condition	SNOMED	443411000000101
40525296	[V]Other multiple birth, born in hospital, mates stillborn	Observation	SNOMED	316013006
44799837	[V]Other multiple birth, born in hospital, mates stillborn	Condition	SNOMED	453621000000107
44796383	[V]Other multiple birth, born outside hospital and not hospitalised, mates live and stillborn	Condition	SNOMED	417581000000106
44800182	[V]Other multiple birth, born outside hospital and not hospitalised, mates stillborn	Condition	SNOMED	463591000000103
40525305	[V]Other multiple birth, born outside hospital and not hospitalized, mates live and stillborn	Observation	SNOMED	316021000
40525298	[V]Other multiple birth, born outside hospital and not hospitalized, mates stillborn	Observation	SNOMED	316015004
40525300	[V]Other multiple birth, mates live and stillborn	Observation	SNOMED	316017007
44801052	[V]Other multiple birth, mates live and stillborn	Condition	SNOMED	466961000000108
40525306	[V]Other multiple birth, mates live and stillborn NOS	Observation	SNOMED	316022007
44799910	[V]Other multiple birth, mates live and stillborn NOS	Condition	SNOMED	453981000000102
40525295	[V]Other multiple birth, mates stillborn	Observation	SNOMED	316012001
44794826	[V]Other multiple birth, mates stillborn	Condition	SNOMED	400211000000103
40525299	[V]Other multiple birth, mates stillborn, NOS	Observation	SNOMED	316016003
44813631	[V]Other multiple birth, mates stillborn, NOS	Condition	SNOMED	439651000000101
40525278	[V]Twin, born before admission to hospital, mate stillborn	Observation	SNOMED	315999002
44796892	[V]Twin, born before admission to hospital, mate stillborn	Observation	SNOMED	428841000000109
40525277	[V]Twin, born in hospital, mate stillborn	Observation	SNOMED	315998005
44796238	[V]Twin, born in hospital, mate stillborn	Observation	SNOMED	415801000000106
44796940	[V]Twin, born outside hospital and not hospitalised, mate stillborn	Observation	SNOMED	428961000000104
40525279	[V]Twin, born outside hospital and not hospitalized, mate stillborn	Observation	SNOMED	316000000
40525276	[V]Twin, mate stillborn	Observation	SNOMED	315997000
44799603	[V]Twin, mate stillborn	Condition	SNOMED	452451000000109
40525282	[V]Twin, mate stillborn NOS	Observation	SNOMED	316001001
44799608	[V]Twin, mate stillborn NOS	Condition	SNOMED	452531000000101
40524867	[V]Twins, both stillborn	Observation	SNOMED	315962002
44796880	[V]Twins, both stillborn	Condition	SNOMED	426481000000103
40524866	[V]Twins, one live born and one stillborn	Observation	SNOMED	315961009
44801688	[V]Twins, one live born and one stillborn	Condition	SNOMED	463561000000109
40521447	[X]Other multiple births, all stillborn	Observation	SNOMED	316757001
44796779	[X]Other multiple births, all stillborn	Procedure	SNOMED	420041000000101
1571757	Continuing pregnancy after spontaneous abortion of one fetus or more	Condition	ICD10CM	O31.1
10024	Continuing pregnancy after spontaneous abortion of one fetus or more, first trimester	Condition	ICD10CM	O31.11
45534209	Continuing pregnancy after spontaneous abortion of one fetus or more, first trimester, fetus 1	Condition	ICD10CM	O31.11X1
45553496	Continuing pregnancy after spontaneous abortion of one fetus or more, first trimester, fetus 2	Condition	ICD10CM	O31.11X2
45558234	Continuing pregnancy after spontaneous abortion of one fetus or more, first trimester, fetus 3	Condition	ICD10CM	O31.11X3
45553497	Continuing pregnancy after spontaneous abortion of one fetus or more, first trimester, fetus 4	Condition	ICD10CM	O31.11X4
45587304	Continuing pregnancy after spontaneous abortion of one fetus or more, first trimester, fetus 5	Condition	ICD10CM	O31.11X5
45601804	Continuing pregnancy after spontaneous abortion of one fetus or more, first trimester, not applicable or unspecified	Condition	ICD10CM	O31.11X0
45596947	Continuing pregnancy after spontaneous abortion of one fetus or more, first trimester, other fetus	Condition	ICD10CM	O31.11X9
10025	Continuing pregnancy after spontaneous abortion of one fetus or more, second trimester	Condition	ICD10CM	O31.12
45577584	Continuing pregnancy after spontaneous abortion of one fetus or more, second trimester, fetus 1	Condition	ICD10CM	O31.12X1
45592218	Continuing pregnancy after spontaneous abortion of one fetus or more, second trimester, fetus 2	Condition	ICD10CM	O31.12X2
45553498	Continuing pregnancy after spontaneous abortion of one fetus or more, second trimester, fetus 3	Condition	ICD10CM	O31.12X3
45563085	Continuing pregnancy after spontaneous abortion of one fetus or more, second trimester, fetus 4	Condition	ICD10CM	O31.12X4
45543945	Continuing pregnancy after spontaneous abortion of one fetus or more, second trimester, fetus 5	Condition	ICD10CM	O31.12X5
45558235	Continuing pregnancy after spontaneous abortion of one fetus or more, second trimester, not applicable or unspecified	Condition	ICD10CM	O31.12X0
45592219	Continuing pregnancy after spontaneous abortion of one fetus or more, second trimester, other fetus	Condition	ICD10CM	O31.12X9
10026	Continuing pregnancy after spontaneous abortion of one fetus or more, third trimester	Condition	ICD10CM	O31.13
45539132	Continuing pregnancy after spontaneous abortion of one fetus or more, third trimester, fetus 1	Condition	ICD10CM	O31.13X1
45582478	Continuing pregnancy after spontaneous abortion of one fetus or more, third trimester, fetus 2	Condition	ICD10CM	O31.13X2
45548741	Continuing pregnancy after spontaneous abortion of one fetus or more, third trimester, fetus 3	Condition	ICD10CM	O31.13X3
45587305	Continuing pregnancy after spontaneous abortion of one fetus or more, third trimester, fetus 4	Condition	ICD10CM	O31.13X4
45563086	Continuing pregnancy after spontaneous abortion of one fetus or more, third trimester, fetus 5	Condition	ICD10CM	O31.13X5
45558236	Continuing pregnancy after spontaneous abortion of one fetus or more, third trimester, not applicable or unspecified	Condition	ICD10CM	O31.13X0
45582479	Continuing pregnancy after spontaneous abortion of one fetus or more, third trimester, other fetus	Condition	ICD10CM	O31.13X9
10023	Continuing pregnancy after spontaneous abortion of one fetus or more, unspecified trimester	Condition	ICD10CM	O31.10
45596946	Continuing pregnancy after spontaneous abortion of one fetus or more, unspecified trimester, fetus 1	Condition	ICD10CM	O31.10X1
45577583	Continuing pregnancy after spontaneous abortion of one fetus or more, unspecified trimester, fetus 2	Condition	ICD10CM	O31.10X2
45534208	Continuing pregnancy after spontaneous abortion of one fetus or more, unspecified trimester, fetus 3	Condition	ICD10CM	O31.10X3
45592217	Continuing pregnancy after spontaneous abortion of one fetus or more, unspecified trimester, fetus 4	Condition	ICD10CM	O31.10X4
45567908	Continuing pregnancy after spontaneous abortion of one fetus or more, unspecified trimester, fetus 5	Condition	ICD10CM	O31.10X5
45577582	Continuing pregnancy after spontaneous abortion of one fetus or more, unspecified trimester, not applicable or unspecified	Condition	ICD10CM	O31.10X0
45539131	Continuing pregnancy after spontaneous abortion of one fetus or more, unspecified trimester, other fetus	Condition	ICD10CM	O31.10X9
45757769	Continuing triplet pregnancy after spontaneous abortion of one or more fetuses	Condition	SNOMED	36801000119105
81360	Fetus papyraceous	Condition	SNOMED	90127001
44835463	Other multiple birth (three or more), mates all stillborn	Condition	ICD9CM	V35
44820418	Other multiple birth (three or more), mates all stillborn, born before admission to hospital	Condition	ICD9CM	V35.1
44822691	Other multiple birth (three or more), mates all stillborn, born outside of hospital and not hospitalized	Condition	ICD9CM	V35.2
44833092	Other multiple birth (three or more), mates liveborn and stillborn	Condition	ICD9CM	V36
44828533	Other multiple birth (three or more), mates liveborn and stillborn, born before admission to hospital	Condition	ICD9CM	V36.1
44828532	Other multiple birth (three or more), mates liveborn and stillborn, born in hospital, delivered without mention of cesarean section	Condition	ICD9CM	V36.01
44821538	Other multiple birth (three or more), mates liveborn and stillborn, born in hospital, delivered without mention of cesarean section	Condition	ICD9CM	V36.00
44830782	Other multiple birth (three or more), mates liveborn and stillborn, born outside hospital and not hospitalized	Condition	ICD9CM	V36.2
44826187	Other multiple birth (three or more), unspecified whether mates liveborn or stillborn	Condition	ICD9CM	V37
44827350	Other multiple birth (three or more), unspecified whether mates liveborn or stillborn, born before admission to hospital	Condition	ICD9CM	V37.1
44834267	Other multiple birth (three or more), unspecified whether mates liveborn or stillborn, born in hospital, delivered by cesarean section	Condition	ICD9CM	V37.01
44825001	Other multiple birth (three or more), unspecified whether mates liveborn or stillborn, born in hospital, delivered without mention of cesarean section	Observation	ICD9CM	V37.00
44828535	Other multiple birth (three or more), unspecified whether mates liveborn or stillborn, born outside of hospital	Condition	ICD9CM	V37.2
45576150	Other multiple births, all stillborn	Observation	ICD10	Z37.7
35225113	Other multiple births, all stillborn	Condition	ICD10CM	Z37.7
44834265	Other multiple, mates all stillborn, born in hospital	Condition	ICD9CM	V35.0
44833093	Other multiple, mates liveborn and stillborn, born in hospital	Condition	ICD9CM	V36.0
44830773	Outcome of delivery, other multiple birth, all stillborn	Condition	ICD9CM	V27.7
44827344	Outcome of delivery, twins, both stillborn	Condition	ICD9CM	V27.4
44826177	Outcome of delivery, twins, one liveborn and one stillborn	Condition	ICD9CM	V27.3
44832527	Papyraceous fetus	Condition	ICD9CM	646.0
45587303	Papyraceous fetus	Condition	ICD10	O31.0
1571756	Papyraceous fetus	Condition	ICD10CM	O31.0
443324	Papyraceous fetus - delivered	Condition	SNOMED	199069008
443323	Papyraceous fetus - not delivered	Condition	SNOMED	199070009
3536392	Papyraceous fetus NOS	Condition	SNOMED	619771000000109
4060287	Papyraceous fetus NOS	Condition	SNOMED	199071008
3536391	Papyraceous fetus unspecified	Condition	SNOMED	619761000000102
4062917	Papyraceous fetus unspecified	Condition	SNOMED	199068000
44830214	Papyraceous fetus, antepartum condition or complication	Condition	ICD9CM	646.03
44829107	Papyraceous fetus, delivered, with or without mention of antepartum condition	Condition	ICD9CM	646.01
10020	Papyraceous fetus, first trimester	Condition	ICD10CM	O31.01
45558231	Papyraceous fetus, first trimester, fetus 1	Condition	ICD10CM	O31.01X1
45563083	Papyraceous fetus, first trimester, fetus 2	Condition	ICD10CM	O31.01X2
45572788	Papyraceous fetus, first trimester, fetus 3	Condition	ICD10CM	O31.01X3
45534204	Papyraceous fetus, first trimester, fetus 4	Condition	ICD10CM	O31.01X4
45534205	Papyraceous fetus, first trimester, fetus 5	Condition	ICD10CM	O31.01X5
45539129	Papyraceous fetus, first trimester, not applicable or unspecified	Condition	ICD10CM	O31.01X0
45606566	Papyraceous fetus, first trimester, other fetus	Condition	ICD10CM	O31.01X9
10021	Papyraceous fetus, second trimester	Condition	ICD10CM	O31.02
45596943	Papyraceous fetus, second trimester, fetus 1	Condition	ICD10CM	O31.02X1
45592216	Papyraceous fetus, second trimester, fetus 2	Condition	ICD10CM	O31.02X2
45563084	Papyraceous fetus, second trimester, fetus 3	Condition	ICD10CM	O31.02X3
45596944	Papyraceous fetus, second trimester, fetus 4	Condition	ICD10CM	O31.02X4
45558232	Papyraceous fetus, second trimester, fetus 5	Condition	ICD10CM	O31.02X5
45577581	Papyraceous fetus, second trimester, not applicable or unspecified	Condition	ICD10CM	O31.02X0
45572789	Papyraceous fetus, second trimester, other fetus	Condition	ICD10CM	O31.02X9
10022	Papyraceous fetus, third trimester	Condition	ICD10CM	O31.03
45539130	Papyraceous fetus, third trimester, fetus 1	Condition	ICD10CM	O31.03X1
45534206	Papyraceous fetus, third trimester, fetus 2	Condition	ICD10CM	O31.03X2
45543944	Papyraceous fetus, third trimester, fetus 3	Condition	ICD10CM	O31.03X3
45572790	Papyraceous fetus, third trimester, fetus 4	Condition	ICD10CM	O31.03X4
45558233	Papyraceous fetus, third trimester, fetus 5	Condition	ICD10CM	O31.03X5
45606567	Papyraceous fetus, third trimester, not applicable or unspecified	Condition	ICD10CM	O31.03X0
45534207	Papyraceous fetus, third trimester, other fetus	Condition	ICD10CM	O31.03X9
44827940	Papyraceous fetus, unspecified as to episode of care or not applicable	Condition	ICD9CM	646.00
10019	Papyraceous fetus, unspecified trimester	Condition	ICD10CM	O31.00
45601803	Papyraceous fetus, unspecified trimester, fetus 1	Condition	ICD10CM	O31.00X1
45553494	Papyraceous fetus, unspecified trimester, fetus 2	Condition	ICD10CM	O31.00X2
45582477	Papyraceous fetus, unspecified trimester, fetus 3	Condition	ICD10CM	O31.00X3
45553495	Papyraceous fetus, unspecified trimester, fetus 4	Condition	ICD10CM	O31.00X4
45563082	Papyraceous fetus, unspecified trimester, fetus 5	Condition	ICD10CM	O31.00X5
45606565	Papyraceous fetus, unspecified trimester, not applicable or unspecified	Condition	ICD10CM	O31.00X0
45539128	Papyraceous fetus, unspecified trimester, other fetus	Condition	ICD10CM	O31.00X9
4222915	Premature birth of fraternal twins, both stillborn	Condition	SNOMED	84382006
4147043	Premature birth of fraternal twins, one living, one stillborn	Condition	SNOMED	30165006
4242724	Premature birth of identical twins, both stillborn	Condition	SNOMED	3798002
4310910	Premature birth of identical twins, one living, one stillborn	Condition	SNOMED	39213008
4184594	Premature birth of stillborn twins	Condition	SNOMED	54650005
42539377	Quadruplets with all four stillborn	Condition	SNOMED	762612009
42538805	Quintuplets with all five stillborn	Condition	SNOMED	762613004
42538806	Sextuplets with all six stillborn	Condition	SNOMED	762614005
4306288	Term birth of fraternal twins, both stillborn	Condition	SNOMED	83121003
4330570	Term birth of fraternal twins, one living, one stillborn	Condition	SNOMED	22514005
4192641	Term birth of identical twins, both stillborn	Condition	SNOMED	75697004
4243026	Term birth of identical twins, one living, one stillborn	Condition	SNOMED	38257001
4203001	Term birth of stillborn twins	Condition	SNOMED	52942000
40311797	Triplets - one live and two stillborn	Condition	SNOMED	147064006
4015422	Triplets - one live and two stillborn	Condition	SNOMED	169833009
40311798	Triplets - three stillborn	Condition	SNOMED	147065007
4015163	Triplets - three stillborn	Condition	SNOMED	169834003
40311796	Triplets - two live and one stillborn	Condition	SNOMED	147063000
4015421	Triplets - two live and one stillborn	Condition	SNOMED	169832004
44826184	Twin birth, mate stillborn	Condition	ICD9CM	V32
44830778	Twin birth, mate stillborn, born before admission to hospital	Condition	ICD9CM	V32.1
44830777	Twin birth, mate stillborn, born in hospital, delivered by cesarean section	Condition	ICD9CM	V32.01
44823818	Twin birth, mate stillborn, born in hospital, delivered without mention of cesarean section	Condition	ICD9CM	V32.00
44820415	Twin birth, mate stillborn, born outside hospital and not hospitalized	Condition	ICD9CM	V32.2
44828531	Twin birth, unspecified whether mate liveborn or stillborn	Condition	ICD9CM	V33
44820416	Twin birth, unspecified whether mate liveborn or stillborn, born before admission to hospital	Condition	ICD9CM	V33.1
44826185	Twin birth, unspecified whether mate liveborn or stillborn, born in hospital, delivered by cesarean section	Observation	ICD9CM	V33.01
44825000	Twin birth, unspecified whether mate liveborn or stillborn, born in hospital, delivered without mention of cesarean section	Condition	ICD9CM	V33.00
44823819	Twin birth, unspecified whether mate liveborn or stillborn, born outside hospital and not hospitalized	Condition	ICD9CM	V33.2
44837808	Twin, mate stillborn, born in hospital	Condition	ICD9CM	V32.0
40311794	Twins - both stillborn	Condition	SNOMED	147061003
4015162	Twins - both stillborn	Condition	SNOMED	169830007
40311793	Twins - one still and one live born	Condition	SNOMED	147060002
4014455	Twins - one still and one live born	Condition	SNOMED	169829002
45542423	Twins, both stillborn	Observation	ICD10	Z37.4
35225112	Twins, both stillborn	Condition	ICD10CM	Z37.4
45595502	Twins, one liveborn and one stillborn	Observation	ICD10	Z37.3
35225111	Twins, one liveborn and one stillborn	Condition	ICD10CM	Z37.3

## Sheet: Extrauterine or molar 
concept_id	concept_name	domain_id	vocabulary_id	concept_code
44787763	[M]Classical hydatidiform mole	Observation	SNOMED	103991000000107
40584364	[M]Classical hydatidiform mole	Observation	SNOMED	408291004
44787764	[M]Complete hydatidiform mole	Condition	SNOMED	104001000000102
40584365	[M]Complete hydatidiform mole	Observation	SNOMED	408292006
44797775	[M]Hydatidiform mole NOS	Observation	SNOMED	439281000000109
40391785	[M]Hydatidiform mole NOS	Observation	SNOMED	189856005
44801563	[X]Other ectopic pregnancy	Condition	SNOMED	462871000000105
40394474	[X]Other ectopic pregnancy	Condition	SNOMED	200481006
44837214	Abdominal pregnancy	Condition	ICD9CM	633.0
40318627	Abdominal pregnancy	Condition	SNOMED	156081004
193525	Abdominal pregnancy	Condition	SNOMED	82661006
45582433	Abdominal pregnancy	Observation	ICD10	O00.0
35209513	Abdominal pregnancy	Condition	ICD10CM	O00.0
44821003	Abdominal pregnancy with intrauterine pregnancy	Condition	ICD9CM	633.01
37200943	Abdominal pregnancy with intrauterine pregnancy	Condition	ICD10CM	O00.01
44824369	Abdominal pregnancy without intrauterine pregnancy	Condition	ICD9CM	633.00
37200942	Abdominal pregnancy without intrauterine pregnancy	Condition	ICD10CM	O00.00
4152444	Antenatal ultrasound confirms ectopic pregnancy	Condition	SNOMED	370382007
40309057	Antenatal ultrasound confirms ectopic pregnancy	Condition	SNOMED	146452004
40339065	Antenatal ultrasound confirms ectopic pregnancy	Condition	SNOMED	169233000
45606529	Blighted ovum and nonhydatidiform mole	Observation	ICD10	O02.0
35209521	Blighted ovum and nonhydatidiform mole	Condition	ICD10CM	O02.0
45592168	Classical hydatidiform mole	Observation	ICD10	O01.0
35209518	Classical hydatidiform mole	Condition	ICD10CM	O01.0
44783183	Combined intrauterine and ovarian pregnancy	Condition	SNOMED	699240001
40483581	Combined tubal and intrauterine pregnancy	Condition	SNOMED	442478007
4129710	Complete hydatidiform mole	Condition	SNOMED	237249000
3571436	Complete hydatidiform mole	Condition	SNOMED	104251000000106
4113846	Delivery of viable fetus in abdominal pregnancy	Condition	SNOMED	198617006
45563179	Delivery of viable fetus in abdominal pregnancy	Observation	ICD10	O83.3
45606528	Ectopic pregnancy	Observation	ICD10	O00
44834860	Ectopic pregnancy	Condition	ICD9CM	633
40318625	Ectopic pregnancy	Condition	SNOMED	156080003
1571602	Ectopic pregnancy	Condition	ICD10CM	O00
1030478	Ectopic pregnancy	Observation	LOINC	LP72505-8
437611	Ectopic pregnancy	Condition	SNOMED	34801009
38001494	Ectopic pregnancy	Observation	DRG	777
38000676	Ectopic Pregnancy	Observation	DRG	378
3536416	Ectopic pregnancy NOS	Condition	SNOMED	620021000000106
40318629	Ectopic pregnancy NOS	Condition	SNOMED	156083001
4113219	Ectopic pregnancy NOS	Condition	SNOMED	198630007
37209653	Ectopic pregnancy of left ovary	Condition	SNOMED	16836261000119107
37209654	Ectopic pregnancy of right ovary	Condition	SNOMED	16836351000119100
646371481	Ectopic pregnancy procedure	APR-DRG	APR-DRG	545
45572743	Ectopic pregnancy, unspecified	Observation	ICD10	O00.9
35209517	Ectopic pregnancy, unspecified	Condition	ICD10CM	O00.9
40308238	Excision of ectopic ovarian pregnancy	Procedure	SNOMED	149988000
4074426	Excision of ectopic ovarian pregnancy	Procedure	SNOMED	176928008
40493226	Excision of fallopian tube and surgical removal of ectopic pregnancy	Procedure	SNOMED	445912000
40308240	Excision of ruptured ectopic tubal pregnancy	Procedure	SNOMED	149990004
4074427	Excision of ruptured ectopic tubal pregnancy	Procedure	SNOMED	176929000
4306064	Fimbrial extraction of tubal pregnancy	Procedure	SNOMED	387616000
40303217	H/O: ectopic pregnancy	Observation	SNOMED	139019003
4059484	H/O: ectopic pregnancy	Observation	SNOMED	161763005
37109043	History of molar pregnancy	Observation	SNOMED	16216821000119102
4170384	Hydatidiform mole	Observation	SNOMED	48430004
44826756	Hydatidiform mole	Condition	ICD9CM	630
40318631	Hydatidiform mole	Condition	SNOMED	156085008
1571603	Hydatidiform mole	Condition	ICD10CM	O01
3545259	Hydatidiform mole	Condition	SNOMED	829161000000102
40392497	Hydatidiform mole	Condition	SNOMED	198611007
40435513	Hydatidiform mole	Condition	SNOMED	235323008
45572744	Hydatidiform mole	Observation	ICD10	O01
4343608	Hydatidiform Mole	Drug	NDFRT	N0000001560
44503599	Hydatidiform mole of thyroid gland	Condition	ICDO3	9100/0-C73
4220900	Hydatidiform mole, benign	Observation	SNOMED	417271000
439083	Hydatidiform mole, benign	Condition	SNOMED	417044008
4344655	Hydatidiform Mole, Invasive	Drug	NDFRT	N0000000773
44499097	Hydatidiform mole, NOS	Observation	ICDO3	9100/0
36521612	Hydatidiform mole, NOS, of corpus uteri	Condition	ICDO3	9100/0-C54.9
36562379	Hydatidiform mole, NOS, of endometrium	Condition	ICDO3	9100/0-C54.1
36527441	Hydatidiform mole, NOS, of fundus uteri	Condition	ICDO3	9100/0-C54.3
36521125	Hydatidiform mole, NOS, of isthmus uteri	Condition	ICDO3	9100/0-C54.0
36519245	Hydatidiform mole, NOS, of myometrium	Condition	ICDO3	9100/0-C54.2
36529965	Hydatidiform mole, NOS, of ovary	Condition	ICDO3	9100/0-C56.9
36519170	Hydatidiform mole, NOS, of overlapping lesion of corpus uteri	Condition	ICDO3	9100/0-C54.8
44500814	Hydatidiform mole, NOS, of placenta	Condition	ICDO3	9100/0-C58.9
44503616	Hydatidiform mole, NOS, of thyroid gland	Condition	ICDO3	9100/0-C73.9
751712	Hydatidiform mole, NOS, of uterus, NOS	Condition	ICDO3	9100/0-C55.9
45596895	Hydatidiform mole, unspecified	Observation	ICD10	O01.9
35209520	Hydatidiform mole, unspecified	Condition	ICD10CM	O01.9
4082045	Hysterectomy for removal of hydatidiform mole	Procedure	SNOMED	24068006
4132295	Hysterotomy with removal of hydatidiform mole	Procedure	SNOMED	26578004
2110292	Hysterotomy, abdominal (eg, for hydatidiform mole, abortion)	Procedure	CPT4	59100
45567877	Incomplete and partial hydatidiform mole	Observation	ICD10	O01.1
35209519	Incomplete and partial hydatidiform mole	Condition	ICD10CM	O01.1
40392498	Incomplete hydatidiform mole	Condition	SNOMED	198612000
37203955	Intramural ectopic pregnancy of myometrium	Condition	SNOMED	786067000
4215504	Invasive hydatidiform mole	Condition	SNOMED	416669000
44499098	Invasive hydatidiform mole	Observation	ICDO3	9100/1
4077588	Invasive hydatidiform mole	Observation	SNOMED	18799007
44500947	Invasive hydatidiform mole of placenta	Condition	ICDO3	9100/1-C58.9
42872572	Laparoscopic excision of ectopic ovarian pregnancy	Procedure	SNOMED	450563004
3544819	Laparoscopic excision of ectopic ovarian pregnancy	Procedure	SNOMED	800501000000105
42872571	Laparoscopic excision of ruptured ectopic tubal pregnancy	Procedure	SNOMED	450562009
3544820	Laparoscopic excision of ruptured ectopic tubal pregnancy	Procedure	SNOMED	800521000000101
45888503	Laparoscopic treatment of ectopic pregnancy	Procedure	CPT4	1008969
4265032	Laparoscopic treatment of ectopic pregnancy with oophorectomy	Procedure	SNOMED	61893009
4270068	Laparoscopic treatment of ectopic pregnancy with salpingectomy	Procedure	SNOMED	63596003
2110300	Laparoscopic treatment of ectopic pregnancy; with salpingectomy and/or oophorectomy	Procedure	CPT4	59151
2110299	Laparoscopic treatment of ectopic pregnancy; without salpingectomy and/or oophorectomy	Procedure	CPT4	59150
1326738	Left ovarian pregnancy with intrauterine pregnancy	Condition	ICD10CM	O00.212
1326735	Left ovarian pregnancy without intrauterine pregnancy	Condition	ICD10CM	O00.202
1326732	Left tubal pregnancy with intrauterine pregnancy	Condition	ICD10CM	O00.112
1326729	Left tubal pregnancy without intrauterine pregnancy	Condition	ICD10CM	O00.102
40320717	Malignant hydatidiform mole	Condition	SNOMED	154643005
1571792	Maternal care for viable fetus in abdominal pregnancy	Condition	ICD10CM	O36.7
4061708	Maternal care for viable fetus in abdominal pregnancy	Condition	SNOMED	200472000
45558279	Maternal care for viable fetus in abdominal pregnancy	Observation	ICD10	O36.7
10093	Maternal care for viable fetus in abdominal pregnancy, first trimester	Condition	ICD10CM	O36.71
45592241	Maternal care for viable fetus in abdominal pregnancy, first trimester, fetus 1	Condition	ICD10CM	O36.71X1
45558281	Maternal care for viable fetus in abdominal pregnancy, first trimester, fetus 2	Condition	ICD10CM	O36.71X2
45596990	Maternal care for viable fetus in abdominal pregnancy, first trimester, fetus 3	Condition	ICD10CM	O36.71X3
45553533	Maternal care for viable fetus in abdominal pregnancy, first trimester, fetus 4	Condition	ICD10CM	O36.71X4
45548776	Maternal care for viable fetus in abdominal pregnancy, first trimester, fetus 5	Condition	ICD10CM	O36.71X5
45572829	Maternal care for viable fetus in abdominal pregnancy, first trimester, not applicable or unspecified	Condition	ICD10CM	O36.71X0
45577616	Maternal care for viable fetus in abdominal pregnancy, first trimester, other fetus	Condition	ICD10CM	O36.71X9
10094	Maternal care for viable fetus in abdominal pregnancy, second trimester	Condition	ICD10CM	O36.72
45587341	Maternal care for viable fetus in abdominal pregnancy, second trimester, fetus 1	Condition	ICD10CM	O36.72X1
45577617	Maternal care for viable fetus in abdominal pregnancy, second trimester, fetus 2	Condition	ICD10CM	O36.72X2
45587342	Maternal care for viable fetus in abdominal pregnancy, second trimester, fetus 3	Condition	ICD10CM	O36.72X3
45548777	Maternal care for viable fetus in abdominal pregnancy, second trimester, fetus 4	Condition	ICD10CM	O36.72X4
45563130	Maternal care for viable fetus in abdominal pregnancy, second trimester, fetus 5	Condition	ICD10CM	O36.72X5
45543986	Maternal care for viable fetus in abdominal pregnancy, second trimester, not applicable or unspecified	Condition	ICD10CM	O36.72X0
45577618	Maternal care for viable fetus in abdominal pregnancy, second trimester, other fetus	Condition	ICD10CM	O36.72X9
10095	Maternal care for viable fetus in abdominal pregnancy, third trimester	Condition	ICD10CM	O36.73
45543987	Maternal care for viable fetus in abdominal pregnancy, third trimester, fetus 1	Condition	ICD10CM	O36.73X1
45601844	Maternal care for viable fetus in abdominal pregnancy, third trimester, fetus 2	Condition	ICD10CM	O36.73X2
45606598	Maternal care for viable fetus in abdominal pregnancy, third trimester, fetus 3	Condition	ICD10CM	O36.73X3
45572830	Maternal care for viable fetus in abdominal pregnancy, third trimester, fetus 4	Condition	ICD10CM	O36.73X4
45572831	Maternal care for viable fetus in abdominal pregnancy, third trimester, fetus 5	Condition	ICD10CM	O36.73X5
45601843	Maternal care for viable fetus in abdominal pregnancy, third trimester, not applicable or unspecified	Condition	ICD10CM	O36.73X0
45553534	Maternal care for viable fetus in abdominal pregnancy, third trimester, other fetus	Condition	ICD10CM	O36.73X9
10092	Maternal care for viable fetus in abdominal pregnancy, unspecified trimester	Condition	ICD10CM	O36.70
45577615	Maternal care for viable fetus in abdominal pregnancy, unspecified trimester, fetus 1	Condition	ICD10CM	O36.70X1
45596988	Maternal care for viable fetus in abdominal pregnancy, unspecified trimester, fetus 2	Condition	ICD10CM	O36.70X2
45596989	Maternal care for viable fetus in abdominal pregnancy, unspecified trimester, fetus 3	Condition	ICD10CM	O36.70X3
45567945	Maternal care for viable fetus in abdominal pregnancy, unspecified trimester, fetus 4	Condition	ICD10CM	O36.70X4
45606597	Maternal care for viable fetus in abdominal pregnancy, unspecified trimester, fetus 5	Condition	ICD10CM	O36.70X5
45558280	Maternal care for viable fetus in abdominal pregnancy, unspecified trimester, not applicable or unspecified	Condition	ICD10CM	O36.70X0
45534249	Maternal care for viable fetus in abdominal pregnancy, unspecified trimester, other fetus	Condition	ICD10CM	O36.70X9
4127235	Methotrexate injection into tubal pregnancy	Procedure	SNOMED	236931002
43530979	Miscarriage of tubal ectopic pregnancy	Condition	SNOMED	609525000
4261322	Molar pregnancy	Condition	SNOMED	44782008
45876985	Molar pregnancy	Meas Value	LOINC	LA14685-4
3545260	Molar pregnancy	Condition	SNOMED	829171000000109
40385324	Molar pregnancy with choriocarcinoma	Condition	SNOMED	1884006
40547699	Molar pregnancy with hydatidiform mole	Condition	SNOMED	367455000
40597260	Molar pregnancy with hydatidiform mole	Condition	SNOMED	41491009
40629392	Molar pregnancy with invasive hydatidiform mole	Condition	SNOMED	74153005
40438964	Molar pregnancy with vesicular mole	Condition	SNOMED	236118006
42513687	Neoplasm defined only by histology: Hydatidiform mole, NOS	Condition	ICDO3	9100/0-NULL
42513688	Neoplasm defined only by histology: Invasive hydatidiform mole	Condition	ICDO3	9100/1-NULL
42513691	Neoplasm defined only by histology: Partial hydatidiform mole	Condition	ICDO3	9103/0-NULL
42514292	Neoplasm defined only by histology: Partial hydatidiform mole, malignant (C58.9)	Condition	ICDO3	9103/3-NULL
44824370	Other ectopic pregnancy	Condition	ICD9CM	633.8
4113217	Other ectopic pregnancy	Condition	SNOMED	198623001
3537961	Other ectopic pregnancy	Condition	SNOMED	642811000000107
45582434	Other ectopic pregnancy	Observation	ICD10	O00.8
35209516	Other ectopic pregnancy	Condition	ICD10CM	O00.8
3536415	Other ectopic pregnancy NOS	Condition	SNOMED	620011000000100
4112953	Other ectopic pregnancy NOS	Condition	SNOMED	198629002
44833695	Other ectopic pregnancy with intrauterine pregnancy	Condition	ICD9CM	633.81
37200949	Other ectopic pregnancy with intrauterine pregnancy	Condition	ICD10CM	O00.81
44821006	Other ectopic pregnancy without intrauterine pregnancy	Condition	ICD9CM	633.80
37200948	Other ectopic pregnancy without intrauterine pregnancy	Condition	ICD10CM	O00.80
40312374	Other ectopic pregnancy, NEC	Condition	SNOMED	14721006
44833694	Ovarian pregnancy	Condition	ICD9CM	633.2
200153	Ovarian pregnancy	Condition	SNOMED	9899009
45572742	Ovarian pregnancy	Observation	ICD10	O00.2
35209515	Ovarian pregnancy	Condition	ICD10CM	O00.2
44821005	Ovarian pregnancy with intrauterine pregnancy	Condition	ICD9CM	633.21
37200947	Ovarian pregnancy with intrauterine pregnancy	Condition	ICD10CM	O00.21
44836063	Ovarian pregnancy without intrauterine pregnancy	Condition	ICD9CM	633.20
37200946	Ovarian pregnancy without intrauterine pregnancy	Condition	ICD10CM	O00.20
4034088	Partial hydatidiform mole	Condition	SNOMED	237250000
4197702	Partial hydatidiform mole	Observation	SNOMED	51793002
44499102	Partial hydatidiform mole	Observation	ICDO3	9103/0
36402919	Partial hydatidiform mole, malignant (C58.9)	Observation	ICDO3	9103/3
4232708	Partial hysterectomy for removal of cornual ectopic pregnancy	Procedure	SNOMED	440148001
44837787	Pregnancy with history of ectopic pregnancy	Condition	ICD9CM	V23.42
4345058	Pregnancy, Abdominal	Drug	NDFRT	N0000002485
4267897	Pregnancy, Ectopic	Drug	NDFRT	N0000002486
45893345	Pregnancy, Ovarian	Drug	NDFRT	N0000191012
4345059	Pregnancy, Tubal	Drug	NDFRT	N0000002487
4017620	Removal of ectopic cervical pregnancy by evacuation	Procedure	SNOMED	10455003
4339303	Removal of ectopic interstitial uterine pregnancy requiring total hysterectomy	Procedure	SNOMED	88144003
4299185	Removal of ectopic pregnancy from fallopian tube	Procedure	SNOMED	387615001
2004788	Removal of extratubal ectopic pregnancy	Procedure	ICD9Proc	74.3
4309622	Removal of hydatidiform mole	Procedure	SNOMED	216209009
40611378	Removal of hydatidiform mole	Procedure	SNOMED	577003
4217304	Removal of intraligamentous ectopic pregnancy	Procedure	SNOMED	81130000
1326737	Right ovarian pregnancy with intrauterine pregnancy	Condition	ICD10CM	O00.211
1326734	Right ovarian pregnancy without intrauterine pregnancy	Condition	ICD10CM	O00.201
1326731	Right tubal pregnancy with intrauterine pregnancy	Condition	ICD10CM	O00.111
1326728	Right tubal pregnancy without intrauterine pregnancy	Condition	ICD10CM	O00.101
4069106	Ruptured ectopic pregnancy	Condition	SNOMED	17433009
4113680	Ruptured tubal pregnancy	Condition	SNOMED	198620003
40627160	Ruptured tubal pregnancy	Condition	SNOMED	77846006
37209657	Ruptured tubal pregnancy of left fallopian tube	Condition	SNOMED	16836571000119103
37209656	Ruptured tubal pregnancy of right fallopian tube	Condition	SNOMED	16836431000119100
4165566	Salpingectomy for tubal ectopic pregnancy by abdominal approach	Procedure	SNOMED	41058005
2004346	Salpingectomy with removal of tubal pregnancy	Procedure	ICD9Proc	66.62
4174577	Secondary abdominal pregnancy	Condition	SNOMED	276881003
45765729	Supervision of high risk pregnancy with history of previous molar pregnancy	Observation	SNOMED	702739003
45757178	Supervision of high risk pregnancy with history of previous molar pregnancy done	Observation	SNOMED	10761551000119100
1571616	Supervision of pregnancy with history of ectopic pregnancy	Condition	ICD10CM	O09.1
45592176	Supervision of pregnancy with history of ectopic pregnancy, first trimester	Condition	ICD10CM	O09.11
45558194	Supervision of pregnancy with history of ectopic pregnancy, second trimester	Condition	ICD10CM	O09.12
45592177	Supervision of pregnancy with history of ectopic pregnancy, third trimester	Condition	ICD10CM	O09.13
45563043	Supervision of pregnancy with history of ectopic pregnancy, unspecified trimester	Condition	ICD10CM	O09.10
37200952	Supervision of pregnancy with history of molar pregnancy	Condition	ICD10CM	O09.A
37200954	Supervision of pregnancy with history of molar pregnancy, first trimester	Condition	ICD10CM	O09.A1
37200955	Supervision of pregnancy with history of molar pregnancy, second trimester	Condition	ICD10CM	O09.A2
37200956	Supervision of pregnancy with history of molar pregnancy, third trimester	Condition	ICD10CM	O09.A3
37200953	Supervision of pregnancy with history of molar pregnancy, unspecified trimester	Condition	ICD10CM	O09.A0
45889225	Surgical treatment of ectopic pregnancy	Procedure	CPT4	1008962
2110295	Surgical treatment of ectopic pregnancy; abdominal pregnancy	Procedure	CPT4	59130
2110298	Surgical treatment of ectopic pregnancy; cervical, with evacuation	Procedure	CPT4	59140
2110296	Surgical treatment of ectopic pregnancy; interstitial, uterine pregnancy requiring total hysterectomy	Procedure	CPT4	59135
2110297	Surgical treatment of ectopic pregnancy; interstitial, uterine pregnancy with partial resection of uterus	Procedure	CPT4	59136
2110293	Surgical treatment of ectopic pregnancy; tubal or ovarian, requiring salpingectomy and/or oophorectomy, abdominal or vaginal approach	Procedure	CPT4	59120
2110294	Surgical treatment of ectopic pregnancy; tubal or ovarian, without salpingectomy and/or oophorectomy	Procedure	CPT4	59121
44821004	Tubal pregnancy	Condition	ICD9CM	633.1
40318628	Tubal pregnancy	Condition	SNOMED	156082006
199076	Tubal pregnancy	Condition	SNOMED	79586000
40392505	Tubal pregnancy	Condition	SNOMED	198619009
45596894	Tubal pregnancy	Observation	ICD10	O00.1
35209514	Tubal pregnancy	Condition	ICD10CM	O00.1
4112951	Tubal pregnancy NOS	Condition	SNOMED	198622006
3539292	Tubal pregnancy NOS	Condition	SNOMED	662511000000101
44823216	Tubal pregnancy with intrauterine pregnancy	Condition	ICD9CM	633.11
37200945	Tubal pregnancy with intrauterine pregnancy	Condition	ICD10CM	O00.11
44837215	Tubal pregnancy without intrauterine pregnancy	Condition	ICD9CM	633.10
37200944	Tubal pregnancy without intrauterine pregnancy	Condition	ICD10CM	O00.10
4129712	Unruptured tubal pregnancy	Condition	SNOMED	237254009
44826757	Unspecified ectopic pregnancy	Condition	ICD9CM	633.9
44821007	Unspecified ectopic pregnancy with intrauterine pregnancy	Condition	ICD9CM	633.91
37200951	Unspecified ectopic pregnancy with intrauterine pregnancy	Condition	ICD10CM	O00.91
44822064	Unspecified ectopic pregnancy without intrauterine pregnancy	Condition	ICD9CM	633.90
37200950	Unspecified ectopic pregnancy without intrauterine pregnancy	Condition	ICD10CM	O00.90
1326739	Unspecified ovarian pregnancy with intrauterine pregnancy	Condition	ICD10CM	O00.219
1326736	Unspecified ovarian pregnancy without intrauterine pregnancy	Condition	ICD10CM	O00.209
1326733	Unspecified tubal pregnancy with intrauterine pregnancy	Condition	ICD10CM	O00.119
1326730	Unspecified tubal pregnancy without intrauterine pregnancy	Condition	ICD10CM	O00.109
2110338	Uterine evacuation and curettage for hydatidiform mole	Procedure	CPT4	59870
4064145	Uterine evacuation and curettage of hydatidiform mole	Procedure	SNOMED	215192006
4129027	Viable fetus in abdominal pregnancy	Condition	SNOMED	237253003

## Sheet: Gender (trans, NB, or GD)
concept_id	concept_name	domain_id	vocabulary_id	concept_code
40388822	[X]Gender identity disorder, unspecified	Condition	SNOMED	192511006
44795592	[X]Gender identity disorder, unspecified	Condition	SNOMED	412321000000104
40388817	[X]Gender identity disorders	Condition	SNOMED	192507000
44795591	[X]Gender identity disorders	Condition	SNOMED	412311000000105
40388820	[X]Other gender identity disorders	Condition	SNOMED	192510007
44798505	[X]Other gender identity disorders	Condition	SNOMED	442041000000100
4284694	Adult gender identity disorder, sexually attracted to both sexes	Condition	SNOMED	67123006
4182401	Adult gender identity disorder, sexually attracted to females	Condition	SNOMED	54417002
4244266	Adult gender identity disorder, sexually attracted to males	Condition	SNOMED	59216005
4247437	Adult gender identity disorder, sexually attracted to neither sex	Condition	SNOMED	61180001
3656001	Bilateral mastectomy for female to male transsexual	Procedure	SNOMED	870629001
37017839	Female to male transsexual person on hormone therapy	Condition	SNOMED	714189008
4234364	Female-to-male transsexual	Condition	SNOMED	407377005
36309198	Female-to-male transsexual	Meas Value	LOINC	LA22880-1
3547047	Gender dysphoria	Condition	SNOMED	936281000000103
3547139	Gender dysphoria	Condition	SNOMED	938481000000103
4246663	Gender dysphoria	Condition	SNOMED	93461009
1588435	Gender Dysphoria	Drug	NDFRT	N0000191886
37108765	Gender dysphoria in adolescence and adulthood	Condition	SNOMED	12277711000119108
37117130	Gender dysphoria in childhood	Condition	SNOMED	12277671000119109
4338512	Gender identity disorder	Condition	SNOMED	87991007
44832243	Gender identity disorder in adolescents or adults	Condition	ICD9CM	302.85
44819548	Gender identity disorder in children	Condition	ICD9CM	302.6
432306	Gender identity disorder of adolescence	Condition	SNOMED	57715001
4148387	Gender identity disorder of adolescence, previously asexual	Condition	SNOMED	3503000
4288747	Gender identity disorder of adolescence, previously heterosexual	Condition	SNOMED	68963006
4148284	Gender identity disorder of adolescence, previously homosexual	Condition	SNOMED	30509009
443625	Gender identity disorder of adulthood	Condition	SNOMED	18003009
4178421	Gender identity disorder of adulthood, previously asexual	Condition	SNOMED	50878001
4029638	Gender identity disorder of adulthood, previously heterosexual	Condition	SNOMED	13670005
4300404	Gender identity disorder of adulthood, previously homosexual	Condition	SNOMED	77815007
436381	Gender identity disorder of childhood	Condition	SNOMED	5095008
35207226	Gender identity disorder of childhood	Condition	ICD10CM	F64.2
45595914	Gender identity disorder of childhood	Condition	ICD10	F64.2
35207228	Gender identity disorder, unspecified	Condition	ICD10CM	F64.9
45542862	Gender identity disorder, unspecified	Condition	ICD10	F64.9
1568253	Gender identity disorders	Condition	ICD10CM	F64
45542860	Gender identity disorders	Condition	ICD10	F64
1585842	Gender Identity: Transgender	Observation	PPI	GenderIdentity_Transgender
37017838	Male to female transsexual person on hormone therapy	Condition	SNOMED	714186001
4248372	Male-to-female transsexual	Condition	SNOMED	407376001
36309787	Male-to-female transsexual	Meas Value	LOINC	LA22881-9
36675593	Non-binary gender	Gender	SNOMED	772004004
42689678	Non-binary gender	Gender	SNOMED	1066981000000107
35207227	Other gender identity disorders	Condition	ICD10CM	F64.8
45600758	Other gender identity disorders	Condition	ICD10	F64.8
43021157	Previously asexual transsexual	Condition	SNOMED	472945003
43021970	Previously bisexual transsexual	Condition	SNOMED	472977000
43021158	Previously heterosexual transsexual	Condition	SNOMED	472946002
43021960	Previously homosexual transsexual	Condition	SNOMED	472947006
4234363	Surgically transgendered transsexual	Gender	SNOMED	407375002
4231242	Surgically transgendered transsexual, female-to-male	Gender	SNOMED	407379008
4251434	Surgically transgendered transsexual, male-to-female	Gender	SNOMED	407378000
3561593	Transgender identity	Gender	SNOMED	1067031000000109
36712829	Transgender identity	Gender	SNOMED	12271241000119109
4231241	Transsexual	Condition	SNOMED	407374003
40426837	Transsexual	Gender	SNOMED	225539008
45882199	Transsexual	Meas Value	LOINC	LA4512-5
440386	Transsexualism	Condition	SNOMED	4296008
4344744	Transsexualism	Drug	NDFRT	N0000003002
37200330	Transsexualism	Condition	ICD10CM	F64.0
40388818	Transsexualism	Condition	SNOMED	192508005
45542861	Transsexualism	Condition	ICD10	F64.0
3582135	Transsexualism NOS	Condition	SNOMED	539971000000105
4098326	Transsexualism NOS	Condition	SNOMED	191786005
434333	Transsexualism, previously asexual	Condition	SNOMED	61262002
433744	Transsexualism, previously heterosexual	Condition	SNOMED	7278005
440991	Transsexualism, previously homosexual	Condition	SNOMED	46904000
4100509	Transsexuality with asexual history	Condition	SNOMED	191783002
4102809	Transsexuality with heterosexual history	Condition	SNOMED	191785009
4102808	Transsexuality with homosexual history	Condition	SNOMED	191784008
3582134	Transsexuality with unspecified sexual history	Condition	SNOMED	539961000000103
4102807	Transsexuality with unspecified sexual history	Condition	SNOMED	191782007
