# Supplementary material for: Leveraging health records to identify diagnoses associated with recurrent pregnancy loss across two medical centers
Source: iScience. 2026 Jan 7;29(2):114633. doi: 10.1016/j.isci.2026.114633 (PMC12877842; doi:10.1016/j.isci.2026.114633)
Supplement: Data S2. Association analysis results for UCSF [file mmc3.xlsx]

## Sheet: UCSF main results
phecode	phenotype	category	rpl_count	control_count	rpl_prop	control_prop	odds_ratio_crude	p_value_crude	adj_p_value_crude	odds_ratio_w_age_re	p_value_w_age_re	adj_p_value_w_age_re	count_under10
785	Abdominal pain	symptoms	728	3138	0.189583	0.181818	1.0527	0.260638	0.830332	1.11358	0.0248364	0.217588	FALSE
426.7	Abnormal electrocardiogram [ECG] [EKG]	circulatory system	76	401	0.0197917	0.0232343	0.84884	0.194779	0.735294	0.883932	0.351459	0.951311	FALSE
514	Abnormal findings examination of lungs	respiratory	33	274	0.00859375	0.0158758	0.537336	0.000793141	0.0113145	0.538553	0.00128299	0.0193288	FALSE
564.8	Abnormal findings on exam of gastrointestinal tract/ abdominal area	digestive	15	83	0.00390625	0.00480909	0.811528	0.457577	0.967744	0.828605	0.52511	1	FALSE
701.5	Abnormal granulation tissue	dermatologic	16	185	0.00416667	0.010719	0.386159	0.000267446	0.00428503	0.418133	0.000985439	0.0151288	FALSE
396	Abnormal heart sounds	circulatory system	30	183	0.0078125	0.0106032	0.734736	0.119119	0.553372	0.784165	0.236373	0.817844	FALSE
350.1	Abnormal involuntary movements	neurological	32	121	0.00833333	0.00701083	1.19022	0.382939	0.949688	1.05225	0.807349	1	FALSE
611.1	Abnormal mammogram	genitourinary	47	98	0.0122396	0.0056782	2.16986	1.39966e-05	0.000289264	1.21861	0.291461	0.891528	FALSE
792	Abnormal Papanicolaou smear of cervix and cervical HPV	genitourinary	81	368	0.0210938	0.0213222	0.989055	0.929304	0.967744	0.912228	0.473717	1	FALSE
573.7	Abnormal results of function study of liver	digestive	17	57	0.00442708	0.00330262	1.34199	0.288139	0.849082	1.43285	0.213992	0.79118	FALSE
246.7	Abnormal results of function study of thyroid	endocrine/metabolic	44	117	0.0114583	0.00677907	1.69825	0.00288797	0.0347418	1.54931	0.0195531	0.182195	FALSE
655.1	Abnormality in fetal heart rate or rhythm	pregnancy complications	379	6130	0.0986979	0.355177	0.198808	1.86049e-180	4.99851e-178	0.188669	2.18974e-183	7.05972e-181	FALSE
654.1	Abnormality of organs and soft tissues of pelvis complicating pregnancy, childbirth, or the puerperium	pregnancy complications	355	2658	0.0924479	0.154007	0.559568	1.90992e-22	7.50924e-21	0.428719	2.71304e-42	1.61979e-40	FALSE
614.54	Abscess or ulceration of vulva	genitourinary	13	42	0.00338542	0.00243351	1.39249	0.297619	0.864408	1.68739	0.116061	0.573897	FALSE
626.11	Absent or infrequent menstruation	genitourinary	575	1593	0.14974	0.0922997	1.73192	8.7992e-26	3.637e-24	1.67306	7.58512e-21	2.91124e-19	FALSE
276.41	Acidosis	endocrine/metabolic	18	82	0.0046875	0.00475114	0.986541	0.95858	0.975525	1.18727	0.532438	1	FALSE
706.1	Acne	dermatologic	132	588	0.034375	0.0340692	1.0093	0.924785	0.967744	1.0881	0.406745	0.999157	FALSE
244.2	Acquired hypothyroidism	endocrine/metabolic	116	340	0.0302083	0.0196999	1.55004	5.83181e-05	0.00111915	1.21894	0.0825189	0.480218	FALSE
702.1	Actinic keratosis	dermatologic	15	43	0.00390625	0.00249145	1.57009	0.133161	0.592458	0.952465	0.877089	1	FALSE
540.11	Acute appendicitis	digestive	14	44	0.00364583	0.00254939	1.43165	0.243039	0.809461	1.70355	0.0986311	0.53175	FALSE
483	Acute bronchitis and bronchiolitis	respiratory	19	75	0.00494792	0.00434556	1.1393	0.612465	0.967744	0.947447	0.841554	1	FALSE
592.11	Acute cystitis	genitourinary	48	153	0.0125	0.00886494	1.41524	0.0368845	0.248778	1.39697	0.056462	0.382423	FALSE
614.31	Acute inflammatory pelvic disease	genitourinary	11	29	0.00286458	0.00168028	1.70685	0.131572	0.592458	2.5637	0.012494	0.12716	FALSE
338.1	Acute pain	neurological	137	600	0.0356771	0.0347645	1.02722	0.780575	0.967744	0.960688	0.691993	1	FALSE
465.2	Acute pharyngitis	respiratory	153	503	0.0398437	0.0291442	1.38236	0.000579771	0.00857423	1.44352	0.000224705	0.00388345	FALSE
285.1	Acute posthemorrhagic anemia	hematopoietic	50	515	0.0130208	0.0298395	0.428926	1.3931e-08	3.87185e-07	0.410163	5.25904e-09	1.46165e-07	FALSE
300.8	Acute reaction to stress	mental disorders	22	83	0.00572917	0.00480909	1.19242	0.464248	0.967744	1.05045	0.845155	1	FALSE
585.1	Acute renal failure	genitourinary	24	142	0.00625	0.00822759	0.758127	0.211099	0.771931	0.689567	0.108044	0.560022	FALSE
464	Acute sinusitis	respiratory	56	141	0.0145833	0.00816965	1.79668	0.000227969	0.00371199	1.55627	0.00809715	0.0932329	FALSE
474.1	Acute tonsillitis	respiratory	11	29	0.00286458	0.00168028	1.70685	0.131572	0.592458	1.75707	0.138377	0.619623	FALSE
465	Acute upper respiratory infections of multiple or unspecified sites	respiratory	164	785	0.0427083	0.0454835	0.936263	0.453056	0.967744	0.88847	0.19774	0.752685	FALSE
304	Adjustment reaction	mental disorders	192	674	0.05	0.0390521	1.2951	0.00203646	0.0264739	1.16751	0.0779101	0.463687	FALSE
967	Adverse effects of sedatives or other central nervous system depressants and anesthetics	injuries & poisonings	10	65	0.00260417	0.00376615	0.690661	0.276568	0.849082	0.771626	0.461945	1	FALSE
300.12	Agorophobia, social phobia, and panic disorder	mental disorders	50	295	0.0130208	0.0170925	0.758642	0.0728458	0.402655	0.740273	0.0597443	0.394686	FALSE
317	Alcohol-related disorders	mental disorders	11	33	0.00286458	0.00191205	1.49961	0.245101	0.814645	1.05155	0.890834	1	FALSE
317.1	Alcoholism	mental disorders	17	60	0.00442708	0.00347645	1.27467	0.378094	0.942947	1.40241	0.241563	0.831605	FALSE
371.21	Allergic conjunctivitis	sense organs	12	29	0.003125	0.00168028	1.8625	0.0703821	0.395317	1.70077	0.144758	0.630673	FALSE
476	Allergic rhinitis	respiratory	153	591	0.0398437	0.034243	1.17035	0.0890856	0.451591	1.09106	0.367805	0.962846	FALSE
949	Allergies, other	injuries & poisonings	54	219	0.0140625	0.012689	1.10978	0.495971	0.967744	1.04134	0.799755	1	FALSE
704.1	Alopecia	dermatologic	61	242	0.0158854	0.0140217	1.13506	0.380269	0.944521	1.10418	0.511011	1	FALSE
292.4	Altered mental status	mental disorders	11	74	0.00286458	0.00428762	0.667153	0.211086	0.771931	0.750457	0.398718	0.996486	FALSE
110.12	Althete's foot	infectious diseases	24	76	0.00625	0.0044035	1.42196	0.133841	0.592458	1.27139	0.321953	0.911884	FALSE
565	Anal and rectal conditions	digestive	41	226	0.0106771	0.0130946	0.813387	0.226264	0.78754	0.797169	0.198444	0.752685	FALSE
946	Anaphylactic shock NOS	injuries & poisonings	13	69	0.00338542	0.00399791	0.846275	0.581578	0.967744	0.787299	0.447208	1	FALSE
644	Anemia during pregnancy	pregnancy complications	259	3399	0.0674479	0.196941	0.294922	6.31765e-74	5.99062e-72	0.288699	1.43481e-72	1.54194e-70	FALSE
635.2	Antepartum hemorrhage, abruptio placentae, and placenta previa	pregnancy complications	469	2205	0.122135	0.127759	0.949855	0.343441	0.894421	0.857016	0.00630793	0.0747675	FALSE
300.1	Anxiety disorder	mental disorders	412	2202	0.107292	0.127586	0.821822	0.000565301	0.00843763	0.737832	3.05457e-07	7.34921e-06	FALSE
513.31	Apnea	respiratory	13	29	0.00338542	0.00168028	2.01824	0.0356518	0.247719	1.74537	0.120799	0.588304	FALSE
427.5	Arrhythmia (cardiac) NOS	circulatory system	46	242	0.0119792	0.0140217	0.852566	0.324359	0.891338	0.77302	0.127312	0.597331	FALSE
716.9	Arthropathy NOS	musculoskeletal	11	28	0.00286458	0.00162234	1.76791	0.109765	0.527102	1.30373	0.476284	1	FALSE
572	Ascites (non malignant)	digestive	13	91	0.00338542	0.00527261	0.64086	0.134148	0.592458	0.603934	0.0990286	0.532114	FALSE
1013	Asphyxia and hypoxemia	NULL	15	150	0.00390625	0.00869112	0.447294	0.00302582	0.0361306	0.444276	0.00391252	0.0512763	FALSE
495	Asthma	respiratory	218	1641	0.0567708	0.0950808	0.572829	6.99195e-14	2.2542e-12	0.571649	4.74195e-13	1.5288e-11	FALSE
495.2	Asthma with exacerbation	respiratory	44	194	0.0114583	0.0112405	1.0196	0.907973	0.967744	1.04879	0.787079	1	FALSE
367.2	Astigmatism	sense organs	43	160	0.0111979	0.00927053	1.21026	0.269175	0.849082	1.17367	0.375136	0.966099	FALSE
939	Atopic/contact dermatitis due to other or unspecified	dermatologic	228	1071	0.059375	0.0620546	0.954093	0.532143	0.967744	0.896099	0.162718	0.672281	FALSE
535.2	Atrophic gastritis	digestive	20	53	0.00520833	0.00307086	1.69969	0.0437331	0.280867	1.49521	0.151729	0.647055	FALSE
313.1	Attention deficit hyperactivity disorder	mental disorders	30	148	0.0078125	0.00857524	0.910353	0.640344	0.967744	0.876813	0.527414	1	FALSE
760	Back pain	symptoms	324	1629	0.084375	0.0943855	0.884166	0.0530149	0.324943	0.892644	0.0878474	0.498627	FALSE
41	Bacterial infection NOS	infectious diseases	94	364	0.0244792	0.0210904	1.16471	0.192888	0.733337	1.30714	0.0315438	0.255521	FALSE
610.4	Benign neoplasm of breast	genitourinary	29	91	0.00755208	0.00527261	1.43561	0.0910759	0.458795	1.40366	0.129365	0.599311	FALSE
208	Benign neoplasm of colon	neoplasms	19	33	0.00494792	0.00191205	2.59566	0.000947184	0.013277	2.40791	0.00376469	0.0501544	FALSE
211	Benign neoplasm of other parts of digestive system	neoplasms	10	17	0.00260417	0.000984993	2.64813	0.014639	0.126193	2.9261	0.0106887	0.115638	FALSE
220	Benign neoplasm of ovary	neoplasms	19	147	0.00494792	0.0085173	0.578842	0.0253115	0.189777	0.583726	0.0327139	0.263674	FALSE
227.3	Benign neoplasm of pituitary gland and craniopharyngeal duct (pouch)	neoplasms	12	45	0.003125	0.00260734	1.19916	0.576718	0.967744	1.11608	0.743305	1	FALSE
216	Benign neoplasm of skin	neoplasms	348	1451	0.090625	0.0840721	1.08571	0.188597	0.722132	0.919579	0.202779	0.763739	FALSE
229	Benign neoplasm of unspecified sites	neoplasms	10	53	0.00260417	0.00307086	0.847628	0.63205	0.967744	0.86703	0.690985	1	FALSE
296.1	Bipolar	mental disorders	35	135	0.00911458	0.00782201	1.16677	0.418204	0.967744	1.19314	0.376593	0.967389	FALSE
367.9	Blindness and low vision	sense organs	15	50	0.00390625	0.00289704	1.34973	0.309229	0.872989	1.66023	0.106012	0.55484	FALSE
578.2	Blood in stool	digestive	31	124	0.00807292	0.00718466	1.12464	0.560134	0.967744	1.43855	0.0851301	0.491863	FALSE
497	Bronchitis	respiratory	28	80	0.00729167	0.00463526	1.5773	0.0385894	0.254539	1.20928	0.411201	0.999157	FALSE
594.1	Calculus of kidney	genitourinary	28	96	0.00729167	0.00556232	1.31319	0.206175	0.764985	1.42523	0.122328	0.590244	FALSE
112	Candidiasis	infectious diseases	144	808	0.0375	0.0468162	0.793253	0.0120655	0.109268	0.827783	0.0499072	0.351312	FALSE
686.1	Carbuncle and furuncle	dermatologic	31	246	0.00807292	0.0142534	0.562855	0.0026784	0.0326306	0.548401	0.00238	0.0336541	FALSE
747	Cardiac and circulatory congenital anomalies	congenital anomalies	13	131	0.00338542	0.00759024	0.44414	0.00532895	0.0576528	0.431687	0.00478477	0.0602582	FALSE
747.1	Cardiac congenital anomalies	congenital anomalies	16	161	0.00416667	0.00932847	0.444346	0.00201534	0.0264124	0.537574	0.0208262	0.189672	FALSE
747.11	Cardiac shunt/ heart septal defect	congenital anomalies	15	167	0.00390625	0.00967611	0.401362	0.000722554	0.0103996	0.462009	0.00538726	0.0657898	FALSE
416	Cardiomegaly	circulatory system	10	82	0.00260417	0.00475114	0.546934	0.0720162	0.401696	0.539954	0.075928	0.456702	FALSE
557.1	Celiac disease	digestive	14	65	0.00364583	0.00376615	0.967936	0.912089	0.967744	0.927664	0.806609	1	FALSE
681.3	Cellulitis and abscess of arm/hand	dermatologic	13	43	0.00338542	0.00249145	1.36003	0.332041	0.894421	1.29516	0.441594	1	FALSE
681.2	Cellulitis and abscess of face/neck	dermatologic	11	24	0.00286458	0.00139058	2.06304	0.0469759	0.294784	1.94786	0.087497	0.498393	FALSE
681.1	Cellulitis and abscess of fingers/toes	dermatologic	10	53	0.00260417	0.00307086	0.847628	0.63205	0.967744	0.767877	0.465141	1	FALSE
681.5	Cellulitis and abscess of leg, except foot	dermatologic	12	41	0.003125	0.00237557	1.31646	0.402889	0.967744	1.3485	0.40216	0.999157	FALSE
681.7	Cellulitis and abscess of trunk	dermatologic	18	102	0.0046875	0.00590996	0.792178	0.363329	0.911229	0.652888	0.112579	0.567117	FALSE
636.8	Cervical incompetence	pregnancy complications	135	234	0.0351562	0.0135581	2.65104	5.76229e-19	2.11109e-17	2.86719	3.72191e-19	1.39528e-17	FALSE
180.3	Cervical intraepithelial neoplasia [CIN] [Cervical dysplasia]	neoplasms	75	362	0.0195312	0.0209746	0.929817	0.570126	0.967744	0.879654	0.333942	0.931339	FALSE
765	Cervical radiculitis	symptoms	28	49	0.00729167	0.0028391	2.57982	6.63221e-05	0.00124315	1.72742	0.0302266	0.248701	FALSE
761	Cervicalgia	symptoms	110	400	0.0286458	0.0231763	1.24296	0.0463474	0.294142	1.05516	0.640157	1	FALSE
614.51	Cervicitis and endocervicitis	genitourinary	50	248	0.0130208	0.0143693	0.904917	0.522036	0.967744	0.803708	0.176899	0.698748	FALSE
574.1	Cholelithiasis	digestive	25	130	0.00651042	0.0075323	0.863444	0.502808	0.967744	1.02879	0.903026	1	FALSE
574.12	Cholelithiasis with other cholecystitis	digestive	11	48	0.00286458	0.00278116	1.03008	0.929448	0.967744	1.07683	0.836523	1	FALSE
758.1	Chromosomal anomalies	congenital anomalies	64	85	0.0166667	0.00492497	3.42453	1.42008e-13	4.48857e-12	3.1412	6.4315e-11	1.91992e-09	FALSE
938.2	Chronic dermatitis due to solar radiation	dermatologic	15	51	0.00390625	0.00295498	1.32318	0.341275	0.894421	1.01388	0.963921	1	FALSE
614.32	Chronic inflammatory pelvic disease	genitourinary	15	43	0.00390625	0.00249145	1.57009	0.133161	0.592458	1.06496	0.841103	1	FALSE
245.21	Chronic lymphocytic thyroiditis	endocrine/metabolic	90	220	0.0234375	0.012747	1.8588	9.40194e-07	2.07615e-05	1.59162	0.000492687	0.00801138	FALSE
338.2	Chronic pain	neurological	151	498	0.0393229	0.0288545	1.37765	0.000713388	0.0103602	1.25577	0.0225922	0.203665	FALSE
472	Chronic pharyngitis and nasopharyngitis	respiratory	39	132	0.0101563	0.00764818	1.33129	0.118165	0.550525	1.15877	0.43967	1	FALSE
585.3	Chronic renal failure [CKD]	genitourinary	14	66	0.00364583	0.00382409	0.953215	0.87088	0.967744	1.25426	0.460137	1	FALSE
475	Chronic sinusitis	respiratory	42	209	0.0109375	0.0121096	0.902137	0.544748	0.967744	0.78394	0.166158	0.67638	FALSE
474.2	Chronic tonsillitis and adenoiditis	respiratory	30	62	0.0078125	0.00359233	2.18402	0.000463342	0.0070463	2.69525	2.63236e-05	0.000505163	FALSE
286.3	Coagulation defects complicating pregnancy or postpartum	hematopoietic	153	1166	0.0398437	0.067559	0.572739	2.29307e-10	6.72077e-09	0.563782	2.5362e-10	7.30063e-09	FALSE
669	Complications of labor and delivery NEC	pregnancy complications	296	3319	0.0770833	0.192305	0.350795	4.03961e-61	3.25592e-59	0.313559	2.02397e-70	2.03915e-68	FALSE
1011	Complications of surgical and medical procedures	NULL	79	325	0.0205729	0.0188308	1.09446	0.476315	0.967744	1.02732	0.839395	1	FALSE
851	Complications of transplants and reattached limbs	injuries & poisonings	23	89	0.00598958	0.00515673	1.16248	0.521019	0.967744	1.07375	0.773269	1	FALSE
389.2	Conductive hearing loss	sense organs	10	39	0.00260417	0.00225969	1.15284	0.688603	0.967744	1.0648	0.864938	1	FALSE
751.11	Congenital anomalies of female genital organs	congenital anomalies	297	237	0.0773438	0.013732	6.02071	2.07359e-90	2.78552e-88	5.24833	1.29833e-69	1.16273e-67	FALSE
691	Congenital anomalies of skin	dermatologic	11	45	0.00286458	0.00260734	1.09895	0.779383	0.967744	0.925894	0.829656	1	FALSE
756.5	Congenital osteodystrophies	congenital anomalies	10	37	0.00260417	0.00214381	1.2153	0.584783	0.967744	1.06768	0.862733	1	FALSE
369.5	Conjunctivitis, infectious	sense organs	46	155	0.0119792	0.00898082	1.33791	0.08471	0.439075	1.21646	0.270486	0.871904	FALSE
563	Constipation	digestive	169	1042	0.0440104	0.0603743	0.716482	8.62945e-05	0.001563	0.757909	0.00169004	0.024994	FALSE
916	Contusion	injuries & poisonings	59	177	0.0153646	0.0102555	1.50595	0.00684561	0.0711943	1.5072	0.0102484	0.111624	FALSE
345.3	Convulsions	neurological	19	91	0.00494792	0.00527261	0.938112	0.800541	0.967744	1.06932	0.800742	1	FALSE
700	Corns and callosities	dermatologic	10	41	0.00260417	0.00237557	1.09648	0.794238	0.967744	0.973198	0.94107	1	FALSE
411.4	Coronary atherosclerosis	circulatory system	17	136	0.00442708	0.00787995	0.559868	0.0244827	0.185287	0.441867	0.00205115	0.029522	FALSE
512.8	Cough	respiratory	231	797	0.0601563	0.0461788	1.32205	0.000285525	0.00446861	1.24642	0.00670339	0.0783033	FALSE
610.1	Cystic mastopathy	genitourinary	32	126	0.00833333	0.00730054	1.14266	0.502268	0.967744	0.972981	0.894178	1	FALSE
592.1	Cystitis	genitourinary	14	44	0.00364583	0.00254939	1.43165	0.243039	0.809461	1.5625	0.167156	0.677023	FALSE
452.2	Deep vein thrombosis [DVT]	circulatory system	20	76	0.00520833	0.0044035	1.18373	0.503202	0.967744	1.16731	0.556927	1	FALSE
722.6	Degeneration of intervertebral disc	musculoskeletal	30	91	0.0078125	0.00527261	1.48551	0.0610607	0.357006	1.14057	0.553178	1	FALSE
296.2	Depression	mental disorders	92	558	0.0239583	0.032331	0.734677	0.00682236	0.0711943	0.697242	0.00244821	0.0343176	FALSE
110.2	Dermatomycoses	infectious diseases	24	115	0.00625	0.00666319	0.937599	0.774721	0.967744	0.892376	0.626277	1	FALSE
110.11	Dermatophytosis of nail	infectious diseases	26	91	0.00677083	0.00527261	1.28609	0.259404	0.830332	1.08546	0.724749	1	FALSE
110.13	Dermatophytosis of the body	infectious diseases	16	61	0.00416667	0.00353439	1.17964	0.557202	0.967744	1.25698	0.440915	1	FALSE
250	Diabetes mellitus	endocrine/metabolic	10	17	0.00260417	0.000984993	2.64813	0.014639	0.126193	2.66583	0.023219	0.206815	FALSE
649.1	Diabetes or abnormal glucose tolerance complicating pregnancy	pregnancy complications	374	3418	0.0973958	0.198042	0.436957	9.97174e-47	6.18248e-45	0.372742	1.18418e-60	1.00468e-58	FALSE
550.2	Diaphragmatic hernia	digestive	16	51	0.00416667	0.00295498	1.41176	0.229709	0.78754	1.12416	0.701472	1	FALSE
561.1	Diarrhea	digestive	118	526	0.0307292	0.0304769	1.00854	0.934483	0.967744	1.02706	0.805775	1	FALSE
704	Diseases of hair and hair follicles	dermatologic	32	119	0.00833333	0.00689495	1.21037	0.339617	0.894421	1.166	0.463551	1	FALSE
528.5	Diseases of lips	digestive	18	50	0.0046875	0.00289704	1.62094	0.0795175	0.422422	1.74857	0.0524585	0.362932	FALSE
703	Diseases of nail, NOS	dermatologic	25	95	0.00651042	0.00550437	1.18397	0.453914	0.967744	0.957832	0.855335	1	FALSE
526	Diseases of the jaws	digestive	13	28	0.00338542	0.00162234	2.09044	0.0282372	0.205965	2.3672	0.0135227	0.136242	FALSE
473	Diseases of the larynx and vocal cords	respiratory	10	36	0.00260417	0.00208587	1.24913	0.534255	0.967744	1.13603	0.731667	1	FALSE
528	Diseases of the oral soft tissues, excluding lesions specific for gingiva and tongue	digestive	14	52	0.00364583	0.00301292	1.21083	0.525911	0.967744	1.25344	0.478107	1	FALSE
830	Dislocation	injuries & poisonings	25	75	0.00651042	0.00434556	1.50144	0.0793251	0.422422	1.27467	0.313042	0.904343	FALSE
689	Disorder of skin and subcutaneous tissue NOS	dermatologic	78	327	0.0203125	0.0189466	1.07358	0.576985	0.967744	0.90692	0.462261	1	FALSE
372	Disorders of conjunctiva	sense organs	13	42	0.00338542	0.00243351	1.39249	0.297619	0.864408	1.31966	0.402375	0.999157	FALSE
275.3	Disorders of magnesium metabolism	endocrine/metabolic	10	52	0.00260417	0.00301292	0.863979	0.672399	0.967744	1.26899	0.506869	1	FALSE
626	Disorders of menstruation and other abnormal bleeding from female genital tract	genitourinary	290	576	0.0755208	0.0333739	2.36604	4.89455e-31	2.25429e-29	2.26662	1.92394e-25	8.16156e-24	FALSE
728	Disorders of muscle, ligament, and fascia	musculoskeletal	18	168	0.0046875	0.00973405	0.479115	0.00308095	0.0365183	0.4406	0.00124994	0.0190086	FALSE
619.2	Disorders of uterus, NEC	genitourinary	336	615	0.0875	0.0356336	2.59512	7.14941e-42	3.84162e-40	2.2647	3.99194e-28	1.83857e-26	FALSE
379.2	Disorders of vitreous body	sense organs	13	57	0.00338542	0.00330262	1.02515	0.935688	0.967744	0.847159	0.606984	1	FALSE
617	Disorders secondary to childbirth, surgery, trauma	genitourinary	454	1132	0.118229	0.065589	1.91019	2.76039e-28	1.20264e-26	1.86583	6.03735e-24	2.37371e-22	FALSE
722.1	Displacement of intervertebral disc	musculoskeletal	30	103	0.0078125	0.0059679	1.31152	0.192814	0.733337	1.13226	0.566501	1	FALSE
687.4	Disturbance of skin sensation	dermatologic	118	500	0.0307292	0.0289704	1.06263	0.558887	0.967744	0.939449	0.56595	1	FALSE
270.11	Disturbances of sulphur-bearing amino-acid metabolism	endocrine/metabolic	27	30	0.00703125	0.00173822	4.06664	1.31901e-07	3.22158e-06	3.52262	8.383e-06	0.0001734	FALSE
386.9	Dizziness and giddiness (Light-headedness and vertigo)	sense organs	151	609	0.0393229	0.0352859	1.11909	0.224901	0.78754	1.18541	0.0813065	0.477716	FALSE
375.1	Dry eyes	sense organs	26	69	0.00677083	0.00399791	1.69832	0.021752	0.169393	1.41481	0.153185	0.648148	FALSE
705.1	Dyshidrosis	dermatologic	10	63	0.00260417	0.00365027	0.712669	0.320347	0.886481	0.612366	0.169423	0.681073	FALSE
626.2	Dysmenorrhea	genitourinary	92	218	0.0239583	0.0126311	1.91879	2.13116e-07	4.97888e-06	1.96478	3.8385e-07	9.09949e-06	FALSE
277.7	Dysmetabolic syndrome X	endocrine/metabolic	76	37	0.0197917	0.00214381	9.39823	8.75977e-29	3.92243e-27	9.55724	3.63334e-26	1.58296e-24	FALSE
625.1	Dyspareunia	genitourinary	76	441	0.0197917	0.0255519	0.770016	0.037306	0.249547	0.779213	0.0539479	0.368491	FALSE
536.8	Dyspepsia and other specified disorders of function of stomach	digestive	22	84	0.00572917	0.00486703	1.17816	0.494815	0.967744	1.06076	0.816894	1	FALSE
532	Dysphagia	digestive	25	71	0.00651042	0.0041138	1.5864	0.0478795	0.297999	1.32544	0.255047	0.856534	FALSE
300.4	Dysthymic disorder	mental disorders	38	213	0.00989583	0.0123414	0.799861	0.207087	0.765653	0.751476	0.120055	0.587181	FALSE
599.3	Dysuria	genitourinary	225	1007	0.0585938	0.0583464	1.0045	0.95285	0.971995	1.01765	0.825751	1	FALSE
636.2	Early onset of delivery	pregnancy complications	87	361	0.0226562	0.0209166	1.0851	0.498953	0.967744	1.12064	0.371265	0.963734	FALSE
636	Early or threatened labor; hemorrhage in early pregnancy	pregnancy complications	533	1851	0.138802	0.107248	1.34163	2.5453e-08	6.83838e-07	1.43699	5.06906e-11	1.54176e-09	FALSE
782.3	Edema	symptoms	48	303	0.0125	0.0175561	0.708359	0.0274656	0.202167	0.657018	0.00953417	0.10673	FALSE
1015	Effects of other external causes	NULL	22	91	0.00572917	0.00527261	1.08709	0.725975	0.967744	1.06424	0.804366	1	FALSE
288.2	Elevated white blood cell count	hematopoietic	25	175	0.00651042	0.0101396	0.63973	0.0373419	0.249547	0.564587	0.0111187	0.118697	FALSE
615	Endometriosis	genitourinary	224	268	0.0583333	0.0155281	3.92739	1.24831e-49	9.14673e-48	3.13188	1.07195e-31	5.57414e-30	FALSE
726.1	Enthesopathy	musculoskeletal	65	173	0.0169271	0.0100238	1.70056	0.000292264	0.0045301	1.27591	0.114548	0.570763	FALSE
345	Epilepsy, recurrent seizures, convulsions	neurological	24	126	0.00625	0.00730054	0.855196	0.483873	0.967744	0.917732	0.711702	1	FALSE
477	Epistaxis or throat hemorrhage	respiratory	24	115	0.00625	0.00666319	0.937599	0.774721	0.967744	0.922088	0.729482	1	FALSE
401.1	Essential hypertension	circulatory system	169	779	0.0440104	0.0451359	0.973917	0.760757	0.967744	0.84614	0.0670106	0.420316	FALSE
381.2	Eustachian tube disorders	sense organs	24	90	0.00625	0.00521467	1.19979	0.429256	0.967744	1.06051	0.804927	1	FALSE
626.12	Excessive or frequent menstruation	genitourinary	158	308	0.0411458	0.0178458	2.36166	5.91698e-18	2.07352e-16	1.93811	3.66921e-10	1.03768e-08	FALSE
643	Excessive vomiting in pregnancy	pregnancy complications	127	725	0.0330729	0.0420071	0.780043	0.0111643	0.102621	0.907531	0.34086	0.940868	FALSE
369.2	Eye infection, viral	sense organs	12	36	0.003125	0.00208587	1.49974	0.224698	0.78754	1.34368	0.39816	0.996486	FALSE
728.7	Fasciitis	musculoskeletal	22	85	0.00572917	0.00492497	1.16423	0.526132	0.967744	0.849779	0.513908	1	FALSE
661	Fetal distress and abnormal forces of labor	pregnancy complications	223	3091	0.0580729	0.179095	0.282596	2.40047e-69	2.03661e-67	0.258628	8.97743e-76	1.03369e-73	FALSE
783	Fever of unknown origin	symptoms	98	425	0.0255208	0.0246248	1.03734	0.74672	0.967744	1.14039	0.271117	0.871904	FALSE
561.2	Flatulence	digestive	70	208	0.0182292	0.0120517	1.5221	0.00257203	0.0321404	1.24909	0.129134	0.599311	FALSE
276.6	Fluid overload	endocrine/metabolic	13	81	0.00338542	0.0046932	0.720398	0.273218	0.849082	0.686634	0.230134	0.808352	FALSE
1001	Foreign body injury	NULL	19	68	0.00494792	0.00393997	1.2571	0.379051	0.942947	1.26505	0.386023	0.983358	FALSE
801	Fracture of ankle and foot	injuries & poisonings	24	82	0.00625	0.00475114	1.31746	0.236238	0.798355	1.0909	0.720338	1	FALSE
804	Fracture of hand or wrist	injuries & poisonings	12	49	0.003125	0.0028391	1.10102	0.765456	0.967744	1.11458	0.74853	1	FALSE
599.5	Frequency of urination and polyuria	genitourinary	139	468	0.0361979	0.0271163	1.34749	0.00241036	0.0303555	1.25394	0.0283163	0.240907	FALSE
596.5	Functional disorders of bladder	genitourinary	18	54	0.0046875	0.0031288	1.50052	0.136791	0.599203	1.44958	0.192912	0.740415	FALSE
727.4	Ganglion and cyst of synovium, tendon, and bursa	musculoskeletal	24	86	0.00625	0.00498291	1.25589	0.325119	0.891338	1.08755	0.728602	1	FALSE
535.9	Gastritis and duodenitis, NOS	digestive	26	83	0.00677083	0.00480909	1.41071	0.126959	0.583072	1.67501	0.0307633	0.251728	FALSE
536.3	Gastroparesis	digestive	11	21	0.00286458	0.00121676	2.35817	0.0213187	0.167637	3.29939	0.00237436	0.0336541	FALSE
300.11	Generalized anxiety disorder	mental disorders	70	449	0.0182292	0.0260154	0.695149	0.00507362	0.0560183	0.625162	0.000442461	0.00727803	FALSE
618	Genital prolapse	genitourinary	24	244	0.00625	0.0141376	0.438576	0.000122903	0.00217714	0.378384	9.0071e-06	0.00018379	FALSE
530.11	GERD	digestive	229	1417	0.0596354	0.0821021	0.709003	2.94841e-06	6.33712e-05	0.665649	1.02538e-07	2.58267e-06	FALSE
365	Glaucoma	sense organs	11	54	0.00286458	0.0031288	0.91531	0.789375	0.967744	0.849755	0.634671	1	FALSE
242.1	Graves' disease	endocrine/metabolic	26	107	0.00677083	0.00619966	1.09276	0.685964	0.967744	0.866439	0.534411	1	FALSE
735.3	Hallux valgus (Bunion)	musculoskeletal	22	47	0.00572917	0.00272322	2.11018	0.00392729	0.04522	1.90077	0.0177007	0.17086	FALSE
389	Hearing loss	sense organs	39	134	0.0101563	0.00776407	1.31127	0.138268	0.603599	1.22359	0.295622	0.892402	FALSE
530.9	Heartburn	digestive	39	276	0.0101563	0.0159917	0.631353	0.00750204	0.0770274	0.61289	0.00573634	0.0695261	FALSE
228	Hemangioma and lymphangioma, any site	neoplasms	23	89	0.00598958	0.00515673	1.16248	0.521019	0.967744	0.952694	0.842806	1	FALSE
228.1	Hemangioma of skin and subcutaneous tissue	neoplasms	49	179	0.0127604	0.0103714	1.23332	0.196106	0.736883	0.986273	0.934533	1	FALSE
593	Hematuria	genitourinary	45	171	0.0117188	0.00990787	1.18494	0.313901	0.876965	1.29057	0.150794	0.645184	FALSE
516.1	Hemoptysis	respiratory	12	33	0.003125	0.00191205	1.63636	0.1446	0.623248	1.94004	0.0670031	0.420316	FALSE
636.3	Hemorrhage in early pregnancy	pregnancy complications	697	722	0.18151	0.0418332	5.07935	1.33032e-181	4.28895e-179	5.22624	5.86122e-167	1.57471e-164	FALSE
459.1	Hemorrhage NOS	circulatory system	31	43	0.00807292	0.00249145	3.25848	5.75909e-07	1.30756e-05	3.34574	1.17383e-06	2.62808e-05	FALSE
578.8	Hemorrhage of rectum and anus	digestive	38	163	0.00989583	0.00944435	1.04828	0.794501	0.967744	1.08104	0.680118	1	FALSE
850	Hemorrhage or hematoma complicating a procedure	injuries & poisonings	14	41	0.00364583	0.00237557	1.53667	0.165869	0.694498	1.41414	0.285109	0.88045	FALSE
455	Hemorrhoids	circulatory system	111	671	0.0289063	0.0388783	0.735872	0.00320427	0.0377028	0.673506	0.000235085	0.00394746	FALSE
54	Herpes simplex	infectious diseases	112	900	0.0291667	0.0521467	0.54608	2.82592e-09	7.99189e-08	0.472242	9.0239e-13	2.85226e-11	FALSE
53	Herpes zoster	infectious diseases	19	73	0.00494792	0.00422968	1.17065	0.541655	0.967744	1.21331	0.470205	1	FALSE
705.3	Hidradenitis	dermatologic	10	42	0.00260417	0.00243351	1.07031	0.847069	0.967744	1.02084	0.955551	1	FALSE
704.2	Hirsutism	dermatologic	26	54	0.00677083	0.0031288	2.17197	0.00119426	0.0163148	2.07054	0.00441093	0.0559875	FALSE
595	Hydronephrosis	genitourinary	22	168	0.00572917	0.00973405	0.586199	0.0188561	0.154962	0.646132	0.0638938	0.408717	FALSE
272.11	Hypercholesterolemia	endocrine/metabolic	19	85	0.00494792	0.00492497	1.00468	0.985347	0.995225	0.787641	0.365312	0.962226	FALSE
643.1	Hyperemesis gravidarum	pregnancy complications	61	297	0.0158854	0.0172084	0.921878	0.565987	0.967744	1.1404	0.375172	0.966099	FALSE
705.8	Hyperhidrosis	dermatologic	25	72	0.00651042	0.00417174	1.56427	0.0546458	0.329921	1.55467	0.0700699	0.431117	FALSE
272.1	Hyperlipidemia	endocrine/metabolic	65	195	0.0169271	0.0112985	1.50675	0.00451032	0.0504905	1.15466	0.348433	0.951311	FALSE
367.8	Hypermetropia	sense organs	13	44	0.00338542	0.00254939	1.32904	0.368292	0.921874	1.29586	0.442336	1	FALSE
642	Hypertension complicating pregnancy, childbirth, and the puerperium	pregnancy complications	285	3564	0.0742188	0.206501	0.308056	9.59871e-75	9.6707e-73	0.284469	3.2895e-80	4.14746e-78	FALSE
401.22	Hypertensive chronic kidney disease	circulatory system	16	53	0.00416667	0.00307086	1.35833	0.283925	0.849082	1.57076	0.134847	0.608889	FALSE
623	Hypertrophy of female genital organs	genitourinary	62	227	0.0161458	0.0131526	1.23132	0.14964	0.638149	1.12835	0.423121	1	FALSE
275.51	Hypocalcemia	endocrine/metabolic	11	40	0.00286458	0.00231763	1.23667	0.533225	0.967744	1.2088	0.602047	1	FALSE
276.14	Hypopotassemia	endocrine/metabolic	27	123	0.00703125	0.00712672	0.98651	0.949222	0.971995	1.10656	0.651787	1	FALSE
276.12	Hyposmolality and/or hyponatremia	endocrine/metabolic	17	96	0.00442708	0.00556232	0.794999	0.384386	0.950354	0.847892	0.553091	1	FALSE
458.9	Hypotension NOS	circulatory system	35	155	0.00911458	0.00898082	1.01503	0.936748	0.967744	1.02177	0.912342	1	FALSE
244.4	Hypothyroidism NOS	endocrine/metabolic	366	1316	0.0953125	0.0762501	1.27634	8.28289e-05	0.00151727	1.01961	0.765255	1	FALSE
276.5	Hypovolemia	endocrine/metabolic	28	162	0.00729167	0.00938641	0.775193	0.215173	0.779877	0.860506	0.484277	1	FALSE
279.1	Immunity deficiency	endocrine/metabolic	14	57	0.00364583	0.00330262	1.1043	0.739878	0.967744	1.35514	0.329587	0.922386	FALSE
380.4	Impacted cerumen	sense organs	39	151	0.0101563	0.00874906	1.16249	0.404232	0.967744	1.05904	0.761395	1	FALSE
250.41	Impaired fasting glucose	endocrine/metabolic	68	461	0.0177083	0.0267107	0.656892	0.00135391	0.0181875	0.585559	8.04599e-05	0.00147388	FALSE
647.1	Infections of genitourinary tract during pregnancy	pregnancy complications	156	1160	0.040625	0.0672113	0.587687	1.09354e-09	3.14783e-08	0.664239	6.19778e-06	0.000131458	FALSE
647	Infectious and parasitic complications affecting pregnancy	pregnancy complications	169	2058	0.0440104	0.119242	0.340039	1.99523e-39	1.03752e-37	0.335313	1.25014e-38	7.19723e-37	FALSE
626.8	Infertility, female	genitourinary	1533	1457	0.399219	0.0844197	7.20688	0	0	5.0737	4.06371e-270	2.18357e-267	FALSE
626.15	Infertility, female, associated with anovulation	genitourinary	236	286	0.0614583	0.0165711	3.88615	1.38549e-51	1.06353e-49	2.88063	8.43501e-29	4.12037e-27	FALSE
371.3	Inflammation of eyelids	sense organs	34	116	0.00885417	0.00672113	1.3202	0.156072	0.658607	1.18194	0.417376	1	FALSE
357	Inflammatory and toxic neuropathy	neurological	13	54	0.00338542	0.0031288	1.0823	0.79829	0.967744	0.93929	0.846174	1	FALSE
613.1	Inflammatory disease of breast	genitourinary	14	150	0.00364583	0.00869112	0.417366	0.00179954	0.0237775	0.409856	0.0019172	0.0280957	FALSE
614.4	Inflammatory diseases of uterus, except cervix	genitourinary	43	96	0.0111979	0.00556232	2.02465	0.000130304	0.00223458	1.95881	0.000598824	0.00946377	FALSE
481	Influenza	respiratory	22	89	0.00572917	0.00515673	1.11165	0.657559	0.967744	1.2619	0.353694	0.951311	FALSE
1009	Injury, NOS	NULL	122	488	0.0317708	0.0282751	1.12769	0.24256	0.809461	1.06589	0.555438	1	FALSE
912	Insect bite	injuries & poisonings	18	63	0.0046875	0.00365027	1.28549	0.348458	0.894421	1.29083	0.360521	0.957027	FALSE
327.4	Insomnia	neurological	112	394	0.0291667	0.0228287	1.28597	0.0205599	0.164888	1.09802	0.411339	0.999157	FALSE
835	Internal derangement of knee	injuries & poisonings	26	46	0.00677083	0.00266528	2.55089	0.000140937	0.00236657	1.99011	0.00893025	0.100668	FALSE
271.3	Intestinal disaccharidase deficiencies and disaccharide malabsorption	endocrine/metabolic	57	211	0.0148437	0.0122255	1.21739	0.190769	0.728719	1.00569	0.971602	1	FALSE
280.2	Iron deficiency anemia secondary to blood loss (chronic)	hematopoietic	21	75	0.00546875	0.00434556	1.25989	0.35066	0.894421	1.03738	0.889861	1	FALSE
280.1	Iron deficiency anemias, unspecified or not due to blood loss	hematopoietic	90	649	0.0234375	0.0376036	0.614237	1.88525e-05	0.000375187	0.601382	1.75328e-05	0.000340517	FALSE
626.14	Irregular menstrual bleeding	genitourinary	79	174	0.0205729	0.0100817	2.06248	1.22627e-07	3.08866e-06	1.8042	4.584e-05	0.000869341	FALSE
626.13	Irregular menstrual cycle	genitourinary	420	908	0.109375	0.0526102	2.21147	1.35876e-37	6.84473e-36	2.15671	5.04739e-32	2.71213e-30	FALSE
626.1	Irregular menstrual cycle/bleeding	genitourinary	86	137	0.0223958	0.00793789	2.86311	3.42256e-14	1.12595e-12	2.66749	3.55963e-11	1.10349e-09	FALSE
564.1	Irritable Bowel Syndrome	digestive	44	146	0.0114583	0.00845935	1.35863	0.0763233	0.414423	1.26441	0.192242	0.739605	FALSE
741.4	Joint effusions	musculoskeletal	41	127	0.0106771	0.00735848	1.45586	0.037463	0.249547	1.37196	0.096185	0.530994	FALSE
840.3	Joint/ligament sprain	injuries & poisonings	55	166	0.0143229	0.00961817	1.49626	0.010083	0.0967483	1.31126	0.100642	0.537203	FALSE
701.4	Keloid scar	dermatologic	17	120	0.00442708	0.00695289	0.63511	0.0805349	0.422422	0.505736	0.0109256	0.117414	FALSE
587	Kidney replaced by transpant	genitourinary	10	18	0.00260417	0.00104293	2.50087	0.0202478	0.163197	2.90347	0.0115313	0.120704	FALSE
655	Known or suspected fetal abnormality affecting management of mother	pregnancy complications	1511	9582	0.39349	0.555189	0.519793	3.33228e-72	2.98424e-70	0.511498	1.23841e-69	1.16273e-67	FALSE
737.3	Kyphoscoliosis and scoliosis	musculoskeletal	29	162	0.00755208	0.00938641	0.803089	0.278674	0.849082	0.869112	0.50192	1	FALSE
645	Late pregnancy and failed induction	pregnancy complications	254	4137	0.0661458	0.239701	0.224666	5.91211e-109	1.05892e-106	0.217217	2.1618e-109	4.35603e-107	FALSE
214	Lipoma	neoplasms	12	34	0.003125	0.00196999	1.58814	0.168927	0.700023	1.31975	0.426472	1	FALSE
214.1	Lipoma of skin and subcutaneous tissue	neoplasms	15	36	0.00390625	0.00208587	1.87614	0.0409539	0.267278	1.42771	0.268987	0.871904	FALSE
687.2	Localized superficial swelling, mass, or lump	dermatologic	57	230	0.0148437	0.0133264	1.11558	0.463061	0.967744	0.966233	0.825099	1	FALSE
611.3	Lump or mass in breast	genitourinary	151	632	0.0393229	0.0366186	1.07687	0.422768	0.967744	0.951047	0.601154	1	FALSE
289.4	Lymphadenitis	hematopoietic	61	226	0.0158854	0.0130946	1.21657	0.177589	0.717382	1.13277	0.413423	0.999157	FALSE
296.22	Major depressive disorder	mental disorders	231	1333	0.0601563	0.0772351	0.764719	0.000268479	0.00428503	0.699035	2.98957e-06	6.5124e-05	FALSE
647.3	Major puerperal infection	pregnancy complications	17	231	0.00442708	0.0133843	0.32779	9.54593e-06	0.000202474	0.31977	9.71868e-06	0.000195706	FALSE
798	Malaise and fatigue	symptoms	208	796	0.0541667	0.0461209	1.18444	0.0343551	0.240583	1.05727	0.50672	1	FALSE
174.11	Malignant neoplasm of female breast	neoplasms	12	41	0.003125	0.00237557	1.31646	0.402889	0.967744	0.81357	0.549727	1	FALSE
652	Malposition and malpresentation of fetus or obstruction	pregnancy complications	250	2624	0.0651042	0.152037	0.388396	4.57185e-43	2.72956e-41	0.367112	8.45026e-46	5.67576e-44	FALSE
613.5	Mastodynia	genitourinary	86	383	0.0223958	0.0221913	1.00943	0.938029	0.967744	0.965024	0.776741	1	FALSE
658	Maternal complication of pregnancy affecting fetus or newborn	pregnancy complications	42	245	0.0109375	0.0141955	0.767953	0.115977	0.541897	0.589795	0.00257446	0.0357761	FALSE
857	Mechanical complication of unspecified genitourinary device, implant, and graft	injuries & poisonings	25	156	0.00651042	0.00903876	0.718444	0.126106	0.580808	0.790825	0.293448	0.892402	FALSE
306.1	Mental disorders durring/after pregnancy	mental disorders	346	3331	0.0901042	0.193001	0.414064	1.37875e-49	9.66327e-48	0.37702	2.20816e-56	1.77978e-54	FALSE
593.2	Microscopic hematuria	genitourinary	14	52	0.00364583	0.00301292	1.21083	0.525911	0.967744	1.41205	0.276519	0.87416	FALSE
340.1	Migrain with aura	neurological	50	272	0.0130208	0.0157599	0.823908	0.21118	0.771931	0.724856	0.0461323	0.336494	FALSE
340	Migraine	neurological	156	828	0.040625	0.047975	0.840308	0.0510214	0.315121	0.830481	0.0455694	0.333899	FALSE
262	Mineral deficiency NEC	endocrine/metabolic	26	99	0.00677083	0.00573614	1.18161	0.450378	0.967744	1.14111	0.56708	1	FALSE
634	Miscarriage; stillbirth	pregnancy complications	2328	10	0.60625	0.000579408	2655.8	1.11993e-135	2.25665e-133	2977.4	5.09372e-138	1.17301e-135	FALSE
296	Mood disorders	mental disorders	25	143	0.00651042	0.00828553	0.784353	0.264133	0.839807	0.695049	0.10801	0.560022	FALSE
278.11	Morbid obesity	endocrine/metabolic	53	270	0.0138021	0.015644	0.880612	0.400767	0.967744	0.83644	0.269255	0.871904	FALSE
622.2	Mucous polyp of cervix	genitourinary	43	151	0.0111979	0.00874906	1.28307	0.151487	0.644213	0.963549	0.837313	1	FALSE
651	Multiple gestation	pregnancy complications	207	513	0.0539063	0.0297236	1.85994	1.88613e-13	5.84701e-12	1.56267	4.97504e-07	1.14568e-05	FALSE
335	Multiple sclerosis	neurological	12	50	0.003125	0.00289704	1.07893	0.813449	0.967744	1.01027	0.975482	1	FALSE
771	Musculoskeletal symptoms referable to limbs	symptoms	20	106	0.00520833	0.00614172	0.847229	0.497643	0.967744	0.762616	0.286665	0.883563	FALSE
770	Myalgia and myositis unspecified	symptoms	39	151	0.0101563	0.00874906	1.16249	0.404232	0.967744	1.02085	0.914256	1	FALSE
367.1	Myopia	sense organs	83	284	0.0216146	0.0164552	1.32047	0.027456	0.202167	1.29691	0.0490803	0.350077	FALSE
789	Nausea and vomiting	symptoms	228	946	0.059375	0.054812	1.0885	0.264706	0.839973	1.25008	0.00531219	0.0655834	FALSE
199	Neoplasm of uncertain behavior	neoplasms	30	113	0.0078125	0.00654731	1.19476	0.388069	0.952483	1.04353	0.843545	1	FALSE
173	Neoplasm of uncertain behavior of skin	neoplasms	99	481	0.0257812	0.0278695	0.923087	0.474221	0.967744	0.762679	0.01975	0.182971	FALSE
580.32	Nephritis and nephropathy with pathological lesion	genitourinary	14	33	0.00364583	0.00191205	1.91009	0.0427854	0.27588	2.27812	0.0165825	0.162006	FALSE
766	Neuralgia, neuritis, and radiculitis NOS	symptoms	19	43	0.00494792	0.00249145	1.99086	0.0126208	0.113658	1.4488	0.208892	0.779476	FALSE
292	Neurological disorders	mental disorders	12	30	0.003125	0.00173822	1.80031	0.0856101	0.442319	1.81838	0.0983546	0.53175	FALSE
288.11	Neutropenia	hematopoietic	12	44	0.003125	0.00254939	1.22649	0.531355	0.967744	1.73615	0.106679	0.556527	FALSE
217.1	Nevus, non-neoplastic	neoplasms	28	174	0.00729167	0.0100817	0.721225	0.109867	0.527102	0.590424	0.0122993	0.126283	FALSE
558	Noninfectious gastroenteritis	digestive	61	245	0.0158854	0.0141955	1.12097	0.428469	0.967744	1.19105	0.249071	0.846478	FALSE
619.3	Noninflammatory disorders of cervix	genitourinary	161	604	0.0419271	0.0349962	1.20671	0.0379704	0.251886	1.07985	0.415317	0.999873	FALSE
619.1	Noninflammatory disorders of ovary, fallopian tube, and broad ligament	genitourinary	126	329	0.0328125	0.0190625	1.74578	1.59958e-07	3.79195e-06	1.32533	0.0119594	0.12358	FALSE
619.4	Noninflammatory disorders of vagina	genitourinary	307	1394	0.0799479	0.0807695	0.988945	0.865701	0.967744	1.04048	0.562248	1	FALSE
619.5	Noninflammatory disorders of vulva and perineum	genitourinary	82	390	0.0213542	0.0225969	0.943804	0.637706	0.967744	0.888573	0.354403	0.951311	FALSE
619	Noninflammatory female genital disorders	genitourinary	109	262	0.0283854	0.0151805	1.89527	3.02038e-08	7.85299e-07	1.76006	3.57721e-06	7.68861e-05	FALSE
395.1	Nonrheumatic mitral valve disorders	circulatory system	24	91	0.00625	0.00527261	1.18654	0.457413	0.967744	1.18047	0.487325	1	FALSE
579.8	Nonspecific abnormal findings in stool contents	digestive	26	71	0.00677083	0.0041138	1.65029	0.0293513	0.210286	1.5734	0.0638367	0.408717	FALSE
793	Nonspecific abnormal findings on radiological and other examination of musculoskeletal system	symptoms	16	41	0.00416667	0.00237557	1.75712	0.0562959	0.338615	1.66361	0.0983134	0.53175	FALSE
793.2	Nonspecific abnormal findings on radiological and other examination of other intrathoracic organs (echocardiogram, etc)	symptoms	33	66	0.00859375	0.00382409	2.25808	0.000140665	0.00236657	2.17812	0.000655519	0.0102592	FALSE
346.1	Nonspecific abnormal findings on radiological and other examination of skull and head	neurological	12	42	0.003125	0.00243351	1.28504	0.444246	0.967744	1.29943	0.444057	1	FALSE
418	Nonspecific chest pain	circulatory system	204	943	0.053125	0.0546382	0.970752	0.708386	0.967744	1.00421	0.9599	1	FALSE
573.6	Nonspecific elevation of levels of transaminase or lactic acid dehydrogenase [LDH]	digestive	18	117	0.0046875	0.00677907	0.690013	0.143778	0.621368	0.795597	0.382323	0.976711	FALSE
241.2	Nontoxic multinodular goiter	endocrine/metabolic	18	64	0.0046875	0.00370821	1.26533	0.378808	0.942947	0.952408	0.862477	1	FALSE
241	Nontoxic nodular goiter	endocrine/metabolic	16	63	0.00416667	0.00365027	1.14206	0.63584	0.967744	1.16878	0.593107	1	FALSE
241.1	Nontoxic uninodular goiter	endocrine/metabolic	44	160	0.0114583	0.00927053	1.23873	0.211032	0.771931	0.957545	0.808893	1	FALSE
650	Normal delivery	pregnancy complications	492	9253	0.128125	0.536126	0.127149	0	0	0.139274	0	0	FALSE
278.1	Obesity	endocrine/metabolic	183	1039	0.0476562	0.0602005	0.781199	0.00267501	0.0326306	0.781983	0.0048808	0.0609911	FALSE
300.3	Obsessive-compulsive disorders	mental disorders	10	54	0.00260417	0.0031288	0.831883	0.593384	0.967744	0.667365	0.260367	0.865384	FALSE
665	Obstetrical/birth trauma	pregnancy complications	502	9712	0.130729	0.562721	0.116865	0	0	0.11978	0	0	FALSE
575.2	Obstruction of bile duct	digestive	31	240	0.00807292	0.0139058	0.57713	0.00413602	0.0472856	0.649243	0.0280461	0.240481	FALSE
327.32	Obstructive sleep apnea	neurological	39	142	0.0101563	0.00822759	1.23682	0.242032	0.809461	0.844548	0.381284	0.976503	FALSE
871.2	Open wound of finger(s)	injuries & poisonings	22	97	0.00572917	0.00562026	1.01949	0.935039	0.967744	1.11222	0.664286	1	FALSE
870.8	Open wound of genital organs	injuries & poisonings	14	181	0.00364583	0.0104873	0.345257	0.000128086	0.00222015	0.354862	0.000234914	0.00394746	FALSE
740.9	Osteoarthrosis NOS	musculoskeletal	25	54	0.00651042	0.0031288	2.08788	0.00240666	0.0303555	1.65456	0.04987	0.351312	FALSE
740.11	Osteoarthrosis, localized, primary	musculoskeletal	16	29	0.00416667	0.00168028	2.48593	0.00350741	0.0409706	1.47133	0.249253	0.846478	FALSE
743.9	Osteopenia or other disorder of bone and cartilage	musculoskeletal	26	120	0.00677083	0.00695289	0.973637	0.902039	0.967744	0.841412	0.447386	1	FALSE
382	Otalgia	sense organs	43	129	0.0111979	0.00747436	1.50382	0.0211603	0.167637	1.54761	0.019312	0.182053	FALSE
790.6	Other abnormal blood chemistry	symptoms	108	371	0.028125	0.021496	1.31731	0.0128922	0.115457	1.26357	0.0437241	0.326311	FALSE
250.42	Other abnormal glucose	endocrine/metabolic	82	512	0.0213542	0.0296657	0.713714	0.00505652	0.0560183	0.612632	8.61237e-05	0.00154257	FALSE
599.9	Other abnormality of urination	genitourinary	56	254	0.0145833	0.014717	0.990786	0.950369	0.971995	0.934999	0.663396	1	FALSE
738	Other acquired musculoskeletal deformity	musculoskeletal	11	37	0.00286458	0.00214381	1.33718	0.398142	0.963672	0.89589	0.762857	1	FALSE
795	Other and nonspecific abnormal cytological, histological and immunological findings	symptoms	25	163	0.00651042	0.00944435	0.68731	0.0819087	0.425925	0.594378	0.0194347	0.182143	FALSE
286.7	Other and unspecified coagulation defects	hematopoietic	22	74	0.00572917	0.00428762	1.33815	0.231582	0.789771	1.32723	0.272147	0.872167	FALSE
654	Other and unspecified complications of birth; puerperium affecting management of mother	pregnancy complications	276	1718	0.071875	0.0995423	0.700531	1.31777e-07	3.22158e-06	0.375672	1.86114e-43	1.1539e-41	FALSE
759	Other and unspecified congenital anomalies	congenital anomalies	21	171	0.00546875	0.00990787	0.549496	0.00982901	0.0961411	0.692199	0.125312	0.595879	FALSE
285	Other anemias	hematopoietic	263	2482	0.0684896	0.143809	0.437745	1.77862e-34	8.6883e-33	0.419615	1.50874e-35	8.38649e-34	FALSE
215	Other benign neoplasm of connective and other soft tissue	neoplasms	55	149	0.0143229	0.00863318	1.66863	0.00126277	0.0171057	1.1225	0.484825	1	FALSE
218.2	Other benign neoplasm of uterus	neoplasms	13	22	0.00338542	0.0012747	2.66148	0.00519695	0.0568348	2.01547	0.058338	0.390211	FALSE
571.5	Other chronic nonalcoholic liver disease	digestive	38	143	0.00989583	0.00828553	1.19629	0.328406	0.894421	1.22153	0.300188	0.893022	FALSE
646	Other complications of pregnancy NEC	pregnancy complications	1045	7949	0.272135	0.460571	0.437897	8.29599e-98	1.33731e-95	0.443736	1.20804e-87	2.16374e-85	FALSE
674	Other complications of the puerperium NEC	pregnancy complications	97	1255	0.0252604	0.0727157	0.330474	4.01603e-25	1.61846e-23	0.30737	3.76025e-27	1.68376e-25	FALSE
649	Other conditions or status of the mother complicating pregnancy, childbirth, or the puerperium	pregnancy complications	1146	9942	0.298438	0.576047	0.313074	4.67722e-200	1.88492e-197	0.312809	3.04834e-184	1.22848e-181	FALSE
742.9	Other derangement of joint	musculoskeletal	74	241	0.0192708	0.0139637	1.38753	0.0146018	0.126193	1.27423	0.0841877	0.488167	FALSE
289	Other diseases of blood and blood-forming organs	hematopoietic	11	66	0.00286458	0.00382409	0.748368	0.374159	0.935108	0.82846	0.581415	1	FALSE
525	Other diseases of the teeth and supporting structures	digestive	18	63	0.0046875	0.00365027	1.28549	0.348458	0.894421	1.75027	0.0477049	0.344845	FALSE
447	Other disorders of arteries and arterioles	circulatory system	10	23	0.00260417	0.00133264	1.95664	0.0767133	0.414423	1.56702	0.282134	0.8763	FALSE
733	Other disorders of bone and cartilage	musculoskeletal	25	95	0.00651042	0.00550437	1.18397	0.453914	0.967744	1.07232	0.766635	1	FALSE
388	Other disorders of ear	sense organs	24	76	0.00625	0.0044035	1.42196	0.133841	0.592458	1.17384	0.513593	1	FALSE
379	Other disorders of eye	sense organs	13	58	0.00338542	0.00336057	1.00742	0.980812	0.991888	0.942803	0.856546	1	FALSE
374	Other disorders of eyelids	sense organs	16	59	0.00416667	0.00341851	1.21977	0.481807	0.967744	1.09384	0.760112	1	FALSE
569	Other disorders of intestine	digestive	19	111	0.00494792	0.00643143	0.768187	0.289386	0.849082	0.664613	0.114719	0.570763	FALSE
573	Other disorders of liver	digestive	26	117	0.00677083	0.00677907	0.998776	0.99551	0.998759	0.999825	0.999386	1	FALSE
568	Other disorders of peritoneum	digestive	19	40	0.00494792	0.00231763	2.14055	0.00641293	0.0675663	1.84128	0.0393076	0.301732	FALSE
729	Other disorders of soft tissues	musculoskeletal	55	240	0.0143229	0.0139058	1.03043	0.842184	0.967744	0.985785	0.927645	1	FALSE
537	Other disorders of stomach and duodenum	digestive	25	40	0.00651042	0.00231763	2.82094	4.95504e-05	0.000962352	2.92128	8.59037e-05	0.00154257	FALSE
676	Other disorders of the breast associated with childbirth and disorders of lactation	pregnancy complications	67	718	0.0174479	0.0416015	0.409096	4.19276e-12	1.27523e-10	0.380834	2.57265e-13	8.46348e-12	FALSE
586	Other disorders of the kidney and ureters	genitourinary	24	173	0.00625	0.0100238	0.621151	0.02935	0.210286	0.680102	0.0884386	0.500221	FALSE
246	Other disorders of thyroid	endocrine/metabolic	74	345	0.0192708	0.0199896	0.963338	0.7728	0.967744	0.742024	0.0263693	0.227312	FALSE
694.2	Other dyschromia	dermatologic	176	740	0.0458333	0.0428762	1.07228	0.416148	0.967744	0.906281	0.271523	0.871904	FALSE
512.9	Other dyspnea	respiratory	75	318	0.0195312	0.0184252	1.06123	0.646634	0.967744	1.02543	0.854118	1	FALSE
259	Other endocrine disorders	endocrine/metabolic	26	73	0.00677083	0.00422968	1.60489	0.0389268	0.255081	1.68315	0.0295009	0.247853	FALSE
414	Other forms of chronic heart disease	circulatory system	17	115	0.00442708	0.00666319	0.662917	0.114476	0.536438	0.669456	0.13825	0.619623	FALSE
339	Other headache syndromes	neurological	180	1055	0.046875	0.0611275	0.755373	0.000692471	0.0101478	0.821385	0.0232218	0.206815	FALSE
282.8	Other hemoglobinopathies	hematopoietic	50	316	0.0130208	0.0183093	0.707349	0.0238732	0.182387	0.752109	0.0732534	0.445602	FALSE
638	Other high-risk pregnancy	pregnancy complications	2072	8809	0.539583	0.5104	1.12418	0.00106888	0.0148537	0.695918	6.36306e-19	2.33119e-17	FALSE
401.3	Other hypertensive complications	circulatory system	17	66	0.00442708	0.00382409	1.15838	0.589609	0.967744	1.30527	0.351903	0.951311	FALSE
701	Other hypertrophic and atrophic conditions of skin	dermatologic	74	293	0.0192708	0.0169766	1.13779	0.325681	0.891338	1.00348	0.97981	1	FALSE
1019	Other ill-defined and unknown causes of morbidity and mortality	NULL	80	216	0.0208333	0.0125152	1.67878	8.80495e-05	0.00157706	1.50066	0.0038303	0.0506101	FALSE
279.7	Other immunological findings	endocrine/metabolic	35	44	0.00911458	0.00254939	3.59888	1.7348e-08	4.73984e-07	3.62849	6.76694e-08	1.7594e-06	FALSE
136	Other infectious and parasitic diseases	infectious diseases	14	26	0.00364583	0.00150646	2.42533	0.00761338	0.0770857	2.50774	0.00971719	0.108028	FALSE
686	Other local infections of skin and subcutaneous tissue	dermatologic	18	87	0.0046875	0.00504085	0.929573	0.778431	0.967744	0.983723	0.951895	1	FALSE
598.9	Other nonspecific findings on examination of urine	genitourinary	82	450	0.0213542	0.0260734	0.815054	0.092136	0.461446	0.878465	0.306353	0.894639	FALSE
656	Other perinatal conditions of fetus or newborn	pregnancy complications	806	3955	0.209896	0.229156	0.893625	0.00984075	0.0961411	0.853322	0.000501954	0.00801138	FALSE
351	Other peripheral nerve disorders	neurological	75	453	0.0195312	0.0262472	0.739031	0.0163554	0.138036	0.617249	0.000226454	0.00388345	FALSE
613.7	Other signs and symptoms in breast	genitourinary	40	134	0.0104167	0.00776407	1.34525	0.101427	0.496963	1.27486	0.194426	0.742687	FALSE
1004	Other signs and symptoms involving emotional state	NULL	29	131	0.00755208	0.00759024	0.994934	0.980332	0.991888	0.92667	0.722891	1	FALSE
610.8	Other specified benign mammary dysplasias	genitourinary	12	38	0.003125	0.00220175	1.42064	0.289699	0.849082	1.03717	0.916634	1	FALSE
427.3	Other specified cardiac dysrhythmias	circulatory system	41	269	0.0106771	0.0155861	0.681641	0.0230265	0.178456	0.683227	0.0295209	0.247853	FALSE
704.8	Other specified diseases of hair and hair follicles	dermatologic	29	105	0.00755208	0.00608378	1.24318	0.301188	0.864408	1.2077	0.391131	0.994424	FALSE
706.8	Other specified diseases of sebaceous glands	dermatologic	23	117	0.00598958	0.00677907	0.882839	0.58599	0.967744	0.950332	0.829744	1	FALSE
279.8	Other specified disorders involving the immune mechanism	endocrine/metabolic	48	25	0.0125	0.00144852	8.72608	1.95199e-18	6.99246e-17	7.92627	2.51462e-15	8.44492e-14	FALSE
613.8	Other specified disorders of breast	genitourinary	34	117	0.00885417	0.00677907	1.30884	0.168945	0.700023	0.96654	0.867685	1	FALSE
695.8	Other specified erythematous conditions	dermatologic	11	38	0.00286458	0.00220175	1.30191	0.441572	0.967744	1.19104	0.63337	1	FALSE
842	Other sprains and strains	injuries & poisonings	10	35	0.00260417	0.00202793	1.28489	0.485029	0.967744	1.18466	0.660948	1	FALSE
1005	Other symptoms	NULL	71	204	0.0184896	0.0118199	1.5749	0.00108128	0.0148976	1.571	0.00200568	0.0291275	FALSE
579	Other symptoms involving abdomen and pelvis	digestive	44	163	0.0114583	0.00944435	1.21572	0.252861	0.821271	1.18289	0.349495	0.951311	FALSE
599.8	Other symptoms involving urinary system	genitourinary	80	355	0.0208333	0.020569	1.01313	0.916959	0.967744	1.02783	0.832869	1	FALSE
599	Other symptoms/disorders or the urinary system	genitourinary	31	76	0.00807292	0.0044035	1.84008	0.00435248	0.0490643	1.6971	0.0190825	0.180947	FALSE
1010	Other tests	NULL	516	5065	0.134375	0.29347	0.373728	1.12997e-85	1.30108e-83	0.375382	3.34473e-80	4.14746e-78	FALSE
479	Other upper respiratory disease	respiratory	96	394	0.025	0.0228287	1.09755	0.419259	0.967744	0.995211	0.968256	1	FALSE
452	Other venous embolism and thrombosis	circulatory system	17	69	0.00442708	0.00399791	1.10783	0.705909	0.967744	1.17133	0.583475	1	FALSE
380.1	Otitis externa	sense organs	20	77	0.00520833	0.00446144	1.16829	0.536459	0.967744	1.13	0.643264	1	FALSE
381.1	Otitis media	sense organs	10	66	0.00260417	0.00382409	0.680157	0.256686	0.827418	0.533245	0.0768938	0.460791	FALSE
628	Ovarian cyst	genitourinary	407	780	0.10599	0.0451938	2.50471	9.89126e-47	6.18248e-45	2.11534	1.77731e-28	8.42653e-27	FALSE
256	Ovarian dysfunction	endocrine/metabolic	140	114	0.0364583	0.00660525	5.69061	2.21659e-42	1.23212e-40	3.1713	7.88476e-18	2.8245e-16	FALSE
625	Pain and other symptoms associated with female genital organs	genitourinary	185	726	0.0481771	0.042065	1.15266	0.0921748	0.461446	1.12184	0.193655	0.741501	FALSE
745	Pain in joint	musculoskeletal	376	1467	0.0979167	0.0849991	1.16847	0.0104092	0.09795	1.0253	0.694972	1	FALSE
773	Pain in limb	symptoms	256	959	0.0666667	0.0555652	1.21406	0.00765119	0.0770857	1.05946	0.450499	1	FALSE
379.9	Pain, swelling or discharge of eye	sense organs	19	65	0.00494792	0.00376615	1.31535	0.294391	0.861266	1.32181	0.312586	0.904343	FALSE
512.2	Painful respiration	respiratory	31	167	0.00807292	0.00967611	0.832966	0.352043	0.894421	0.826173	0.352252	0.951311	FALSE
427.9	Palpitations	circulatory system	181	826	0.0471354	0.0478591	0.984131	0.849116	0.967744	0.951785	0.572636	1	FALSE
792.1	Papanicolaou smear of cervix or vagina with atypical squamous cells	genitourinary	225	1114	0.0585938	0.064546	0.902043	0.171366	0.702907	0.871618	0.078903	0.465903	FALSE
427.11	Paroxysmal supraventricular tachycardia	circulatory system	34	242	0.00885417	0.0140217	0.628171	0.0115198	0.104915	0.616071	0.0113694	0.120575	FALSE
427.12	Paroxysmal ventricular tachycardia	circulatory system	10	54	0.00260417	0.0031288	0.831883	0.593384	0.967744	0.99391	0.986465	1	FALSE
614.33	Pelvic inflammatory disease, NOS	genitourinary	21	35	0.00546875	0.00202793	2.70605	0.000319497	0.00490505	4.28776	1.00763e-06	2.28775e-05	FALSE
614.1	Pelvic peritoneal adhesions, female (postoperative) (postinfection)	genitourinary	36	77	0.009375	0.00446144	2.11176	0.000226119	0.00371199	1.65287	0.0174525	0.169479	FALSE
726	Peripheral enthesopathies and allied syndromes	musculoskeletal	26	75	0.00677083	0.00434556	1.56191	0.0507868	0.314878	1.13748	0.588944	1	FALSE
386.2	Peripheral or central vertigo	sense organs	16	31	0.00416667	0.00179616	2.32528	0.00620659	0.0662584	1.90325	0.0517227	0.360062	FALSE
568.1	Peritoneal adhesions (postoperative) (postinfection)	digestive	21	102	0.00546875	0.00590996	0.924934	0.745383	0.967744	0.782922	0.32841	0.922386	FALSE
451	Phlebitis and thrombophlebitis	circulatory system	26	348	0.00677083	0.0201634	0.33127	6.19196e-08	1.58436e-06	0.317492	4.42823e-08	1.20988e-06	FALSE
300.13	Phobia	mental disorders	12	57	0.003125	0.00330262	0.946049	0.861595	0.967744	0.91854	0.797356	1	FALSE
253.1	Pituitary hyperfunction	endocrine/metabolic	32	42	0.00833333	0.00243351	3.44478	1.47342e-07	3.54499e-06	3.73869	7.94442e-08	2.03276e-06	FALSE
635.3	Placenta previa and abruptio placenta	pregnancy complications	225	2595	0.0585938	0.150356	0.351714	8.27104e-48	5.55538e-46	0.320527	1.92446e-53	1.41011e-51	FALSE
507	Pleurisy; pleural effusion	respiratory	27	134	0.00703125	0.00776407	0.904946	0.637083	0.967744	1.10897	0.643098	1	FALSE
480	Pneumonia	respiratory	19	88	0.00494792	0.00509879	0.970263	0.905247	0.967744	1.06083	0.824389	1	FALSE
256.4	Polycystic ovaries	endocrine/metabolic	180	398	0.046875	0.0230604	2.08349	1.15852e-15	3.8907e-14	2.15205	1.39367e-15	4.77999e-14	FALSE
622.1	Polyp of corpus uteri	genitourinary	261	198	0.0679687	0.0114723	6.28374	1.13381e-81	1.21847e-79	4.09327	2.59521e-44	1.67339e-42	FALSE
627.3	Postmenopausal atrophic vaginitis	genitourinary	12	152	0.003125	0.008807	0.35281	0.000516875	0.00778693	0.290262	5.38646e-05	0.000998042	FALSE
475.9	Postnasal drip	respiratory	31	86	0.00807292	0.00498291	1.62517	0.0209078	0.166849	1.42022	0.109414	0.563498	FALSE
300.9	Posttraumatic stress disorder	mental disorders	52	227	0.0135417	0.0131526	1.02999	0.8486	0.967744	0.986938	0.935644	1	FALSE
418.1	Precordial pain	circulatory system	10	29	0.00260417	0.00168028	1.55127	0.231738	0.789771	1.4987	0.304451	0.893022	FALSE
642.1	Preeclampsia and eclampsia	pregnancy complications	133	1927	0.0346354	0.111652	0.285461	1.00436e-42	5.78224e-41	0.253054	1.72428e-48	1.2085e-46	FALSE
427.6	Premature beats	circulatory system	20	99	0.00520833	0.00573614	0.907504	0.692954	0.967744	0.756776	0.277315	0.87416	FALSE
627.5	Premature menopause and other ovarian failure	genitourinary	412	285	0.107292	0.0165131	7.15807	4.79248e-136	1.10364e-133	3.75374	2.56546e-55	1.9693e-53	FALSE
626.4	Premenstrual tension syndromes	genitourinary	15	30	0.00390625	0.00173822	2.25216	0.0103675	0.09795	1.61309	0.15464	0.652564	FALSE
286.81	Primary hypercoagulable state	hematopoietic	138	155	0.0359375	0.00898082	4.11347	7.19894e-33	3.41315e-31	4.19726	1.71267e-30	8.62757e-29	FALSE
287.31	Primary thrombocytopenia	hematopoietic	18	119	0.0046875	0.00689495	0.678337	0.125816	0.580808	0.639281	0.0893851	0.502611	FALSE
425.1	Primary/intrinsic cardiomyopathies	circulatory system	15	84	0.00390625	0.00486703	0.801821	0.431655	0.967744	0.774149	0.381636	0.976503	FALSE
653	Problems associated with amniotic cavity and membranes	pregnancy complications	436	4801	0.113542	0.278174	0.332364	9.39606e-94	1.37695e-91	0.337194	1.25563e-86	2.02408e-84	FALSE
618.1	Prolapse of vaginal walls	genitourinary	12	176	0.003125	0.0101976	0.304271	6.86615e-05	0.00127221	0.240577	2.57842e-06	5.69371e-05	FALSE
269	Proteinuria	endocrine/metabolic	20	155	0.00520833	0.00898082	0.57774	0.0213007	0.167637	0.656801	0.0894847	0.502611	FALSE
695.7	Prurigo and Lichen	dermatologic	16	91	0.00416667	0.00527261	0.78937	0.383977	0.950354	0.679507	0.17288	0.691519	FALSE
698	Pruritus and related conditions	dermatologic	142	856	0.0369792	0.0495973	0.735819	0.000902633	0.0127635	0.698533	0.000183697	0.00321869	FALSE
696.41	Psoriasis vulgaris	dermatologic	29	130	0.00755208	0.0075323	1.00265	0.989772	0.998443	0.948992	0.807628	1	FALSE
303.3	Psychogenic disorder	mental disorders	10	20	0.00260417	0.00115882	2.25052	0.0364217	0.247719	2.09456	0.0695184	0.429935	FALSE
508	Pulmonary collapse; interstitial and compensatory emphysema	respiratory	21	158	0.00546875	0.00915464	0.59516	0.025908	0.192576	0.651423	0.0784456	0.464906	FALSE
503	Pulmonary congestion and hypostasis	respiratory	10	81	0.00260417	0.0046932	0.553718	0.0782256	0.418936	0.521622	0.0629612	0.408717	FALSE
287	Purpura and other hemorrhagic conditions	hematopoietic	10	17	0.00260417	0.000984993	2.64813	0.014639	0.126193	2.48683	0.0296846	0.247936	FALSE
590	Pyelonephritis	genitourinary	44	160	0.0114583	0.00927053	1.23873	0.211032	0.771931	1.68505	0.0041901	0.0540355	FALSE
687.1	Rash and other nonspecific skin eruption	dermatologic	171	926	0.0445313	0.0536532	0.82206	0.0214835	0.168113	0.792965	0.00880328	0.0999358	FALSE
443.1	Raynaud's syndrome	circulatory system	18	80	0.0046875	0.00463526	1.01132	0.965656	0.979734	0.821137	0.470362	1	FALSE
555.1	Regional enteritis	digestive	19	89	0.00494792	0.00515673	0.959305	0.869743	0.967744	1.00912	0.972257	1	FALSE
327.71	Restless legs syndrome	neurological	11	64	0.00286458	0.00370821	0.771844	0.428217	0.967744	0.660984	0.219559	0.800988	FALSE
599.2	Retention of urine	genitourinary	34	335	0.00885417	0.0194102	0.451303	1.08599e-05	0.000227354	0.438945	9.83387e-06	0.000195706	FALSE
654.2	Rhesus isoimmunization in pregnancy	pregnancy complications	122	862	0.0317708	0.049945	0.624177	1.67751e-06	3.65425e-05	0.588211	1.89067e-07	4.68887e-06	FALSE
714.1	Rheumatoid arthritis	musculoskeletal	10	47	0.00260417	0.00272322	0.956169	0.897727	0.967744	0.829357	0.608959	1	FALSE
695.3	Rosacea	dermatologic	51	175	0.0132812	0.0101396	1.31401	0.0881448	0.451591	1.05787	0.734444	1	FALSE
701.2	Scar conditions and fibrosis of skin	dermatologic	34	168	0.00885417	0.00973405	0.9088	0.612694	0.967744	0.74441	0.133556	0.608172	FALSE
764	Sciatica	symptoms	74	379	0.0192708	0.0219596	0.875154	0.298852	0.864408	0.828087	0.156923	0.660468	FALSE
706.2	Sebaceous cyst	dermatologic	58	232	0.0151042	0.0134423	1.12553	0.423978	0.967744	0.963454	0.808903	1	FALSE
690.1	Seborrheic dermatitis	dermatologic	55	166	0.0143229	0.00961817	1.49626	0.010083	0.0967483	1.26037	0.159269	0.666159	FALSE
702.2	Seborrheic keratosis	dermatologic	102	376	0.0265625	0.0217857	1.22524	0.0724615	0.402655	0.863307	0.211663	0.785693	FALSE
244.1	Secondary hypothyroidism	endocrine/metabolic	29	105	0.00755208	0.00608378	1.24318	0.301188	0.864408	0.947683	0.808588	1	FALSE
287.32	Secondary thrombocytopenia	hematopoietic	23	303	0.00598958	0.0175561	0.3372	5.29079e-07	1.21839e-05	0.316081	1.97387e-07	4.82103e-06	FALSE
389.1	Sensorineural hearing loss	sense organs	40	122	0.0104167	0.00706878	1.4786	0.0326621	0.231944	1.32509	0.141473	0.625915	FALSE
994.2	Sepsis	injuries & poisonings	14	75	0.00364583	0.00434556	0.83839	0.545632	0.967744	0.892251	0.710984	1	FALSE
470	Septal Deviations/Turbinate Hypertrophy	respiratory	23	90	0.00598958	0.00521467	1.1495	0.552128	0.967744	0.960593	0.868138	1	FALSE
38	Septicemia	infectious diseases	14	66	0.00364583	0.00382409	0.953215	0.87088	0.967744	1.00716	0.981823	1	FALSE
90	Sexually transmitted infections (not HIV or hepatitis)	infectious diseases	18	63	0.0046875	0.00365027	1.28549	0.348458	0.894421	1.89079	0.0252241	0.219141	FALSE
637	Short gestation; low birth weight; and fetal growth retardation	pregnancy complications	22	160	0.00572917	0.00927053	0.615797	0.0335315	0.236038	0.599073	0.0302391	0.248701	FALSE
512.7	Shortness of breath	respiratory	153	687	0.0398437	0.0398053	1.00101	0.99121	0.998759	1.04643	0.635356	1	FALSE
709.2	Sicca syndrome	dermatologic	15	38	0.00390625	0.00220175	1.77719	0.0597598	0.354164	1.48963	0.209831	0.781172	FALSE
282.5	Sickle cell anemia	hematopoietic	16	76	0.00416667	0.0044035	0.945992	0.840366	0.967744	1.23198	0.479688	1	FALSE
240	Simple and unspecified goiter	endocrine/metabolic	15	67	0.00390625	0.00388203	1.00626	0.982596	0.993069	0.930281	0.809227	1	FALSE
327.3	Sleep apnea	neurological	12	38	0.003125	0.00220175	1.42064	0.289699	0.849082	1.15877	0.67556	1	FALSE
327	Sleep disorders	neurological	34	96	0.00885417	0.00556232	1.5971	0.0194606	0.157641	1.56643	0.03467	0.276673	FALSE
772.2	Spasm of muscle	symptoms	21	75	0.00546875	0.00434556	1.25989	0.35066	0.894421	1.15112	0.596219	1	FALSE
720	Spinal stenosis	musculoskeletal	11	22	0.00286458	0.0012747	2.25085	0.028202	0.205965	1.53539	0.279743	0.87416	FALSE
720.1	Spinal stenosis of lumbar region	musculoskeletal	17	36	0.00442708	0.00208587	2.12741	0.0104512	0.09795	1.67703	0.0996311	0.533573	FALSE
721.1	Spondylosis without myelopathy	musculoskeletal	22	61	0.00572917	0.00353439	1.62456	0.0516408	0.317729	1.21194	0.464615	1	FALSE
840	Sprains and strains	injuries & poisonings	85	308	0.0221354	0.0178458	1.24582	0.0759364	0.414423	1.02968	0.822034	1	FALSE
841	Sprains and strains of back and neck	injuries & poisonings	14	62	0.00364583	0.00359233	1.01495	0.960079	0.976434	1.00048	0.998772	1	FALSE
741.2	Stiffness of joint	musculoskeletal	19	40	0.00494792	0.00231763	2.14055	0.00641293	0.0675663	1.41735	0.232175	0.808352	FALSE
41.2	Streptococcus infection	infectious diseases	24	304	0.00625	0.017614	0.350775	8.29076e-07	1.85621e-05	0.378996	8.39032e-06	0.0001734	FALSE
624.9	stress incontinence, female	genitourinary	45	378	0.0117188	0.0219016	0.52955	6.1853e-05	0.00117302	0.412035	4.98721e-08	1.31793e-06	FALSE
368.9	Subjective visual disturbances	sense organs	12	41	0.003125	0.00237557	1.31646	0.402889	0.967744	1.33249	0.40802	0.999157	FALSE
316	Substance addiction and disorders	mental disorders	52	323	0.0135417	0.0187149	0.719783	0.0289053	0.209889	0.897691	0.497568	1	FALSE
297.1	Suicidal ideation	mental disorders	11	50	0.00286458	0.00289704	0.988765	0.972974	0.985197	1.44274	0.300981	0.893022	FALSE
681	Superficial cellulitis and abscess	dermatologic	34	156	0.00885417	0.00903876	0.979395	0.912794	0.967744	0.910599	0.638187	1	FALSE
915	Superficial injury without mention of infection	injuries & poisonings	25	126	0.00651042	0.00730054	0.891063	0.599548	0.967744	0.826925	0.410357	0.999157	FALSE
381.11	Suppurative and unspecified otitis media	sense organs	28	94	0.00729167	0.00544643	1.34129	0.174102	0.705763	1.35267	0.184379	0.719658	FALSE
771.1	Swelling of limb	symptoms	75	323	0.0195312	0.0187149	1.04449	0.736646	0.967744	0.971608	0.832128	1	FALSE
293.1	Swelling, mass, or lump in head and neck [Space-occupying lesion, intracranial NOS]	mental disorders	43	162	0.0111979	0.00938641	1.19518	0.301278	0.864408	1.10749	0.571476	1	FALSE
627.2	Symptomatic menopause	genitourinary	11	15	0.00286458	0.000869112	3.30259	0.0026418	0.0326306	1.79982	0.159385	0.666159	FALSE
687	Symptoms affecting skin	dermatologic	37	114	0.00963542	0.00660525	1.46321	0.0452002	0.289138	1.43782	0.0696111	0.429935	FALSE
741	Symptoms and disorders of the joints	musculoskeletal	44	151	0.0114583	0.00874906	1.31325	0.113648	0.534111	1.08599	0.649143	1	FALSE
429.3	Symptoms involving cardiovascular system	circulatory system	26	101	0.00677083	0.00585202	1.15808	0.505949	0.967744	1.03747	0.873576	1	FALSE
561	Symptoms involving digestive system	digestive	40	196	0.0104167	0.0113564	0.91638	0.616624	0.967744	0.83366	0.315216	0.907241	FALSE
624	Symptoms involving female genital tract	genitourinary	73	355	0.0190104	0.020569	0.922759	0.535614	0.967744	1.08325	0.55762	1	FALSE
293	Symptoms involving head and neck	mental disorders	11	26	0.00286458	0.00150646	1.90412	0.0737229	0.405602	1.79219	0.12647	0.597221	FALSE
781	Symptoms involving nervous and musculoskeletal systems	symptoms	14	46	0.00364583	0.00266528	1.36925	0.304037	0.864408	1.33064	0.374471	0.966099	FALSE
519.9	Symptoms involving respiratory system and other chest symptoms	respiratory	16	120	0.00416667	0.00695289	0.597594	0.0535929	0.327241	0.620672	0.0854408	0.491895	FALSE
772	Symptoms of the muscles	symptoms	40	245	0.0104167	0.0141955	0.730999	0.0676479	0.383974	0.660033	0.0183225	0.175809	FALSE
788	Syncope and collapse	symptoms	70	368	0.0182292	0.0213222	0.852245	0.224522	0.78754	0.946059	0.686328	1	FALSE
727.1	Synovitis and tenosynovitis	musculoskeletal	50	324	0.0130208	0.0187728	0.689558	0.0151228	0.128984	0.577504	0.000500936	0.00801138	FALSE
695.42	Systemic lupus erythematosus	dermatologic	24	91	0.00625	0.00527261	1.18654	0.457413	0.967744	1.31074	0.261733	0.865633	FALSE
427.7	Tachycardia NOS	circulatory system	82	605	0.0213542	0.0350542	0.600648	1.85534e-05	0.000373851	0.70096	0.00395796	0.0514535	FALSE
704.12	Telogen effluvium	dermatologic	11	28	0.00286458	0.00162234	1.76791	0.109765	0.527102	1.70049	0.161524	0.671073	FALSE
306.9	Tension headache	mental disorders	18	94	0.0046875	0.00544643	0.859999	0.558674	0.967744	0.913992	0.736569	1	FALSE
763	Thoracic or lumbosacral neuritis or radiculitis, unspecified	symptoms	34	87	0.00885417	0.00504085	1.76324	0.00521808	0.0568348	1.52361	0.0487992	0.349619	FALSE
636.1	Threatened premature labor	pregnancy complications	66	207	0.0171875	0.0119937	1.44061	0.0104103	0.09795	1.55209	0.00348894	0.0468681	FALSE
478	Throat pain	respiratory	12	39	0.003125	0.00225969	1.38413	0.325461	0.891338	1.49253	0.249454	0.846478	FALSE
287.3	Thrombocytopenia	hematopoietic	61	657	0.0158854	0.0380671	0.407895	3.09228e-11	9.23104e-10	0.415073	2.08882e-10	6.12213e-09	FALSE
193	Thyroid cancer	neoplasms	16	52	0.00416667	0.00301292	1.38453	0.25601	0.827029	1.04465	0.884808	1	FALSE
245	Thyroiditis	endocrine/metabolic	12	34	0.003125	0.00196999	1.58814	0.168927	0.700023	1.54844	0.21202	0.785693	FALSE
242	Thyrotoxicosis with or without goiter	endocrine/metabolic	47	189	0.0122396	0.0109508	1.11915	0.492426	0.967744	1.01505	0.930716	1	FALSE
389.4	Tinnitus	sense organs	29	96	0.00755208	0.00556232	1.36045	0.147756	0.631782	1.13226	0.575112	1	FALSE
318	Tobacco use disorder	mental disorders	71	331	0.0184896	0.0191784	0.963407	0.777661	0.967744	1.00536	0.969253	1	FALSE
291.1	Transient mental disorders due to conditions classified elsewhere	mental disorders	23	235	0.00598958	0.0136161	0.436515	0.000155379	0.00258218	0.400479	4.83911e-05	0.000907053	FALSE
250.1	Type 1 diabetes	endocrine/metabolic	18	99	0.0046875	0.00573614	0.816327	0.429477	0.967744	1.04373	0.872625	1	FALSE
250.2	Type 2 diabetes	endocrine/metabolic	62	347	0.0161458	0.0201055	0.799825	0.108197	0.525343	0.712623	0.0202486	0.185459	FALSE
555.2	Ulcerative colitis	digestive	19	113	0.00494792	0.00654731	0.754503	0.257157	0.827418	0.749689	0.26259	0.865633	FALSE
555.21	Ulcerative colitis (chronic)	digestive	15	76	0.00390625	0.0044035	0.886636	0.670825	0.967744	0.950241	0.86166	1	FALSE
663	Umbilical cord complications during labor and delivery	pregnancy complications	242	3666	0.0630208	0.212411	0.249389	3.5466e-90	4.39778e-88	0.255908	8.493e-84	1.24461e-81	FALSE
550.4	Umbilical hernia	digestive	12	62	0.003125	0.00359233	0.869501	0.657996	0.967744	0.616431	0.141682	0.625915	FALSE
709.7	Unspecified diffuse connective tissue disease	dermatologic	52	30	0.0135417	0.00173822	7.88374	2.74289e-19	1.02827e-17	7.32095	2.20208e-16	7.71686e-15	FALSE
599.4	Urinary incontinence	genitourinary	54	420	0.0140625	0.0243351	0.571847	0.000124846	0.00218751	0.468106	4.02298e-07	9.39861e-06	FALSE
591	Urinary tract infection	genitourinary	169	794	0.0440104	0.046005	0.954649	0.592255	0.967744	1.0509	0.584498	1	FALSE
947	Urticaria	dermatologic	58	263	0.0151042	0.0152384	0.991054	0.950981	0.971995	1.02525	0.869357	1	FALSE
218.1	Uterine leiomyoma	neoplasms	377	1056	0.0981771	0.0611855	1.6704	3.25584e-16	1.11669e-14	1.06901	0.318181	0.911026	FALSE
371.1	Uveitis, noninfectious or NOS	sense organs	14	35	0.00364583	0.00202793	1.80073	0.0633015	0.365742	2.17643	0.0226154	0.203665	FALSE
614.52	Vaginitis and vulvovaginitis	genitourinary	188	660	0.0489583	0.0382409	1.29469	0.00228501	0.0294675	1.47866	1.36774e-05	0.000268877	FALSE
454.1	Varicose veins of lower extremity	circulatory system	19	50	0.00494792	0.00289704	1.71144	0.0466532	0.294784	1.48256	0.165247	0.674375	FALSE
454.11	Varicose veins of lower extremity, symptomtic	circulatory system	10	34	0.00260417	0.00196999	1.32276	0.437387	0.967744	1.26337	0.52934	1	FALSE
671	Venous/cerebrovascular complications embolism in pregnancy and the puerperium	pregnancy complications	157	1519	0.0408854	0.0880121	0.441718	1.66973e-21	6.40857e-20	0.40771	2.41668e-24	9.73921e-23	FALSE
70.2	Viral hepatitis B	infectious diseases	16	113	0.00416667	0.00654731	0.634872	0.0896776	0.453167	0.567605	0.0403851	0.308535	FALSE
79	Viral infection	infectious diseases	62	358	0.0161458	0.0207428	0.774746	0.0658146	0.374887	0.858495	0.292141	0.891914	FALSE
78	Viral warts & HPV	infectious diseases	99	383	0.0257812	0.0221913	1.16605	0.178502	0.717382	0.989794	0.931365	1	FALSE
79.9	Viremia, NOS	infectious diseases	25	112	0.00651042	0.00648937	1.00326	0.988281	0.997564	1.07891	0.746279	1	FALSE
368	Visual disturbances	sense organs	47	257	0.0122396	0.0148908	0.819751	0.213171	0.777449	0.768298	0.113597	0.56869	FALSE
261.2	Vitamin B-complex deficiencies	endocrine/metabolic	13	75	0.00338542	0.00434556	0.778302	0.404952	0.967744	0.776779	0.413403	0.999157	FALSE
261.4	Vitamin D deficiency	endocrine/metabolic	115	381	0.0299479	0.0220754	1.36763	0.00372153	0.0431591	1.25833	0.0443354	0.328743	FALSE
473.4	Voice disturbance	respiratory	14	56	0.00364583	0.00324468	1.12409	0.695977	0.967744	0.974882	0.934673	1	FALSE
512.1	Wheezing	respiratory	23	68	0.00598958	0.00393997	1.52334	0.081828	0.425925	1.457	0.141724	0.625915	FALSE
550	Abdominal hernia	digestive											TRUE
790.9	Abnormal arterial blood gases	symptoms											TRUE
512.3	Abnormal chest sounds	respiratory											TRUE
286.9	Abnormal coagulation profile	hematopoietic											TRUE
611	Abnormal findings on mammogram or breast exam	genitourinary											TRUE
346	Abnormal findings on study of brain and/or nervous system	neurological											TRUE
429.2	Abnormal function study of cardiovascular system	circulatory system											TRUE
781.2	Abnormal posture	symptoms											TRUE
350.5	Abnormal reflex	neurological											TRUE
589	Abnormal results of function study of kidney	genitourinary											TRUE
514.1	Abnormal results of function study of pulmonary system	respiratory											TRUE
794	Abnormal results of other function studies (bladder, pancreas, placenta, spleen, etc)	symptoms											TRUE
516	Abnormal sputum	respiratory											TRUE
350.2	Abnormality of gait	neurological											TRUE
289.9	Abnormality of red blood cells	hematopoietic											TRUE
276.4	Acid-base balance disorder	endocrine/metabolic											TRUE
175	Acquired absence of breast	neoplasms											TRUE
701.6	Acquired acanthosis nigricans	dermatologic											TRUE
286.4	Acquired coagulation factor deficiency	hematopoietic											TRUE
736.2	Acquired deformities of finger	musculoskeletal											TRUE
736.1	Acquired deformities of forearm	musculoskeletal											TRUE
736.3	Acquired deformities of hip	musculoskeletal											TRUE
735	Acquired foot deformities	musculoskeletal											TRUE
283	Acquired hemolytic anemias	hematopoietic											TRUE
738.4	Acquired spondylolisthesis	musculoskeletal											TRUE
735.2	Acquired toe deformities	musculoskeletal											TRUE
253.11	Acromegaly and gigantism	endocrine/metabolic											TRUE
323.2	Acute (transverse) myelitis	neurological											TRUE
474	Acute and chronic tonsillitis	respiratory											TRUE
573.4	Acute and subacute necrosis of liver	digestive											TRUE
498	Acute bronchospasm	respiratory											TRUE
938.1	Acute dermatitis due to solar radiation	dermatologic											TRUE
446.2	Acute febrile mucocutaneous lymph node syndrome (Kawasaki disease)	circulatory system											TRUE
535.1	Acute gastritis	digestive											TRUE
580.13	Acute glomerulonephritis, NOS	genitourinary											TRUE
81.11	Acute graft-versus-host disease	infectious diseases											TRUE
465.4	Acute laryngitis and tracheitis	respiratory											TRUE
710.11	Acute osteomyelitis	musculoskeletal											TRUE
577.1	Acute pancreatitis	digestive											TRUE
420.21	Acute pericarditis	circulatory system											TRUE
523.31	Acute periodontitis	digestive											TRUE
415.1	Acute pulmonary heart disease	circulatory system											TRUE
394.4	Acute rheumatic heart disease	circulatory system											TRUE
441.1	Acute vascular insufficiency of intestine	circulatory system											TRUE
433.6	Acute, but ill-defined cerebrovascular disease	circulatory system											TRUE
255.1	Adrenal hyperfunction	endocrine/metabolic											TRUE
255.2	Adrenal hypofunction	endocrine/metabolic											TRUE
255.3	Adrenogenital disorders	endocrine/metabolic											TRUE
260.3	Adult failure to thrive	endocrine/metabolic											TRUE
979	Adverse drug events and drug allergies	injuries & poisonings											TRUE
941	Adverse reaction to serum or vaccine	injuries & poisonings											TRUE
317.11	Alcoholic liver damage	mental disorders											TRUE
276.42	Alkalosis	endocrine/metabolic											TRUE
287.2	Allergic purpura	hematopoietic											TRUE
930	Allergic reaction to food	injuries & poisonings											TRUE
704.11	Alopecia Areata	dermatologic											TRUE
270.34	Alpha-1-antitrypsin deficiency	endocrine/metabolic											TRUE
291.8	Alteration of consciousness	mental disorders											TRUE
368.1	Amblyopia	sense organs											TRUE
270.33	Amyloidosis	endocrine/metabolic											TRUE
565.1	Anal and rectal polyp	digestive											TRUE
285.21	Anemia in chronic kidney disease	hematopoietic											TRUE
285.22	Anemia in neoplastic disease	hematopoietic											TRUE
285.2	Anemia of chronic disease	hematopoietic											TRUE
411.41	Aneurysm and dissection of heart	circulatory system											TRUE
442.8	Aneurysm of other specified artery	circulatory system											TRUE
411.3	Angina pectoris	circulatory system											TRUE
368.3	Anisometropia	sense organs											TRUE
715.2	Ankylosing spondylitis	musculoskeletal											TRUE
741.1	Ankylosis of joint	musculoskeletal											TRUE
759.1	Anomalies of endocrine glands, congenital	congenital anomalies											TRUE
526.3	Anomalies of jaw size/symmetry	digestive											TRUE
379.4	Anomalies of pupillary function	sense organs											TRUE
748	Anomalies of respiratory system, congenital	congenital anomalies											TRUE
524.3	Anomalies of tooth position/malocclusion	digestive											TRUE
426.4	Anomalous atrioventricular excitation	circulatory system											TRUE
260.6	Anorexia	endocrine/metabolic											TRUE
305.21	Anorexia nervosa	mental disorders											TRUE
334.2	Anterior horn cell disease	neurological											TRUE
253.4	Anterior pituitary disorders	endocrine/metabolic											TRUE
964.1	Anticoagulants causing adverse effects	injuries & poisonings											TRUE
972.6	Antihypertensive agents causing adverse effects	injuries & poisonings											TRUE
963.1	Antineoplastic and immunosuppressive drugs causing adverse effects	injuries & poisonings											TRUE
301.2	Antisocial/borderline personality disorder	mental disorders											TRUE
300	Anxiety disorders	mental disorders											TRUE
442.1	Aortic aneurysm	circulatory system											TRUE
447.7	Aortic ectasia	circulatory system											TRUE
394.3	Aortic valve disease	circulatory system											TRUE
379.3	Aphakia and other disorders of lens	sense organs											TRUE
292.11	Aphasia	mental disorders											TRUE
292.1	Aphasia/speech disturbance	mental disorders											TRUE
284	Aplastic anemia	hematopoietic											TRUE
540	Appendiceal conditions	digestive											TRUE
540.1	Appendicitis	digestive											TRUE
442.4	Arterial dissection	circulatory system											TRUE
444	Arterial embolism and thrombosis	circulatory system											TRUE
444.1	Arterial embolism and thrombosis of lower extremity artery	circulatory system											TRUE
446.9	Arteritis NOS	circulatory system											TRUE
526.42	Arthralgia/ankylosis of temporomandibular joint	digestive											TRUE
713.5	Arthropathy associated with neurological disorders	musculoskeletal											TRUE
713	Arthropathy associated with other disorders classified elsewhere	musculoskeletal											TRUE
133	Arthropod-borne diseases	infectious diseases											TRUE
742.8	Articular cartilage disorder	musculoskeletal											TRUE
414.2	ASCVD	circulatory system											TRUE
733.4	Aseptic necrosis of bone	musculoskeletal											TRUE
117.4	Aspergillosis	infectious diseases											TRUE
440.9	Atherosclerosis of aorta	circulatory system											TRUE
440.22	Atherosclerosis of native arteries of the extremities with intermittent claudication	circulatory system											TRUE
440.1	Atherosclerosis of renal artery	circulatory system											TRUE
440.2	Atherosclerosis of the extremities	circulatory system											TRUE
427.21	Atrial fibrillation	circulatory system											TRUE
427.22	Atrial flutter	circulatory system											TRUE
426.2	Atrioventricular [AV] block	circulatory system											TRUE
426.24	Atrioventricular block, complete	circulatory system											TRUE
624.2	Atrophy of female genital tract	genitourinary											TRUE
313.3	Autism	mental disorders											TRUE
279.2	Autoimmune disease NEC	endocrine/metabolic											TRUE
283.1	Autoimmune hemolytic anemias	hematopoietic											TRUE
609.11	Azoospermia and oligospermia	genitourinary											TRUE
38.3	Bacteremia	infectious diseases											TRUE
8.5	Bacterial enteritis	infectious diseases											TRUE
480.1	Bacterial pneumonia	respiratory											TRUE
539	Bariatric surgery	digestive											TRUE
530.13	Barrett's esophagus	digestive											TRUE
172.21	Basal cell carcinoma	neoplasms											TRUE
711.3	Behcet's syndrome	musculoskeletal											TRUE
227.1	Benign neoplasm of adrenal gland	neoplasms											TRUE
213	Benign neoplasm of bone and articular cartilage	neoplasms											TRUE
225.1	Benign neoplasm of brain, cranial nerves, meninges	neoplasms											TRUE
224	Benign neoplasm of eye	neoplasms											TRUE
224.1	Benign neoplasm of eye, uveal	neoplasms											TRUE
223	Benign neoplasm of kidney and other urinary organs	neoplasms											TRUE
210	Benign neoplasm of lip, oral cavity, and pharynx	neoplasms											TRUE
229.1	Benign neoplasm of lymph nodes	neoplasms											TRUE
221	Benign neoplasm of other female genital organs	neoplasms											TRUE
227.2	Benign neoplasm of parathyroid gland	neoplasms											TRUE
212	Benign neoplasm of respiratory and intrathoracic organs	neoplasms											TRUE
225.2	Benign neoplasm of spinal cord, meninges	neoplasms											TRUE
226	Benign neoplasm of thyroid glands	neoplasms											TRUE
596.1	Bladder neck obstruction	genitourinary											TRUE
117.3	Blastomycotic infection	infectious diseases											TRUE
911	Blister	injuries & poisonings											TRUE
170.1	Bone cancer	neoplasms											TRUE
860	Bone marrow or stem cell transplant	neoplasms											TRUE
174.1	Breast cancer [female]	neoplasms											TRUE
612	Breast conditions, congenital or relating to hormones	genitourinary											TRUE
613.9	Breast disorder NOS	genitourinary											TRUE
873	Broken tooth	injuries & poisonings											TRUE
496.3	Bronchiectasis	respiratory											TRUE
480.5	Bronchopneumonia and lung abscess	respiratory											TRUE
695.2	Bullous dermatoses	dermatologic											TRUE
426.3	Bundle branch block	circulatory system											TRUE
1000	Burns	NULL											TRUE
726.3	Bursitis	musculoskeletal											TRUE
727.2	Bursitis disorders	musculoskeletal											TRUE
260.1	Cachexia	endocrine/metabolic											TRUE
726.4	Calcaneal spur; Exostosis NOS	musculoskeletal											TRUE
574.2	Calculus of bile duct	digestive											TRUE
594.2	Calculus of lower urinary tract	genitourinary											TRUE
594.3	Calculus of ureter	genitourinary											TRUE
189.2	Cancer of bladder	neoplasms											TRUE
191.11	Cancer of brain	neoplasms											TRUE
191.1	Cancer of brain and nervous system	neoplasms											TRUE
165.1	Cancer of bronchus; lung	neoplasms											TRUE
170.2	Cancer of connective tissue	neoplasms											TRUE
190	Cancer of eye	neoplasms											TRUE
164	Cancer of intrathoracic organs	neoplasms											TRUE
145.3	Cancer of major salivary glands	neoplasms											TRUE
145	Cancer of mouth	neoplasms											TRUE
194	Cancer of other endocrine glands	neoplasms											TRUE
184	Cancer of other female genital organs	neoplasms											TRUE
184.2	Cancer of other female genital organs (excluding uterus and ovary)	neoplasms											TRUE
202	Cancer of other lymphoid, histiocytic tissue	neoplasms											TRUE
151	Cancer of stomach	neoplasms											TRUE
145.2	Cancer of tongue	neoplasms											TRUE
165	Cancer within the respiratory system	neoplasms											TRUE
195	Cancer, suspected or other	neoplasms											TRUE
112.3	Candidiasis of skin and nails	infectious diseases											TRUE
172.3	Carcinoma in situ of skin	neoplasms											TRUE
427.42	Cardiac arrest	circulatory system											TRUE
429.9	Cardiac complications, not elsewhere classified	circulatory system											TRUE
426	Cardiac conduction disorders	circulatory system											TRUE
426.92	Cardiac defibrillator in situ	circulatory system											TRUE
426.91	Cardiac pacemaker in situ	circulatory system											TRUE
797.1	Cardiogenic shock	symptoms											TRUE
277.8	Carnitine deficiencies	endocrine/metabolic											TRUE
347	Cataplexy and narcolepsy	neurological											TRUE
366	Cataract	sense organs											TRUE
681.6	Cellulitis and abscess of foot, toe	dermatologic											TRUE
528.3	Cellulitis and abscess of oral soft tissues	digestive											TRUE
386.21	Central origin vertigo	sense organs											TRUE
327.31	Central/nonobstroctive sleep apnea	neurological											TRUE
433.5	Cerebral aneurysm	circulatory system											TRUE
433.21	Cerebral artery occlusion, with cerebral infarction	circulatory system											TRUE
348.4	Cerebral cysts	neurological											TRUE
331.9	Cerebral degeneration, unspecified	neurological											TRUE
348.2	Cerebral edema and compression of brain	neurological											TRUE
433.3	Cerebral ischemia	circulatory system											TRUE
816	Cerebral laceration and contusion	injuries & poisonings											TRUE
433	Cerebrovascular disease	circulatory system											TRUE
958	Certain early complications of trauma or procedure	injuries & poisonings											TRUE
180.1	Cervical cancer	neoplasms											TRUE
767	Cervicocranial/Cervicobrachial syndrome	symptoms											TRUE
687.3	Changes in skin texture	dermatologic											TRUE
575.1	Cholangitis	digestive											TRUE
574.3	Cholecystitis without cholelithiasis	digestive											TRUE
574.11	Cholelithiasis with acute cholecystitis	digestive											TRUE
385.3	Cholesteatoma	sense organs											TRUE
575.6	Cholesterolosis of gallbladder	digestive											TRUE
274.21	Chondrocalcinosis	endocrine/metabolic											TRUE
363	Chorioretinal inflammations, scars, and other disorders of choroid	sense organs											TRUE
363.3	Chorioretinal scars	sense organs											TRUE
758	Chromosomal anomalies and genetic disorders	congenital anomalies											TRUE
496	Chronic airway obstruction	respiratory											TRUE
496.2	Chronic bronchitis	respiratory											TRUE
592.12	Chronic cystitis	genitourinary											TRUE
798.1	Chronic fatigue syndrome	symptoms											TRUE
580.14	Chronic glomerulonephritis, NOS	genitourinary											TRUE
81.12	Chronic graft-versus-host disease	infectious diseases											TRUE
70.4	Chronic hepatitis	infectious diseases											TRUE
371.9	Chronic inflammatory disorders of orbit	sense organs											TRUE
592.13	Chronic interstitial cystitis	genitourinary											TRUE
585.4	Chronic kidney disease, Stage I or II	genitourinary											TRUE
585.33	Chronic Kidney Disease, Stage III	genitourinary											TRUE
585.34	Chronic Kidney Disease, Stage IV	genitourinary											TRUE
473.1	Chronic laryngitis	respiratory											TRUE
495.1	Chronic obstructive asthma	respiratory											TRUE
495.11	Chronic obstructive asthma with exacerbation	respiratory											TRUE
710.12	Chronic osteomyelitis	musculoskeletal											TRUE
355.1	Chronic pain syndrome	neurological											TRUE
577.2	Chronic pancreatitis	digestive											TRUE
573.1	Chronic passive congestion of liver	digestive											TRUE
420.22	Chronic pericarditis	circulatory system											TRUE
523.32	Chronic periodontitis	digestive											TRUE
415.2	Chronic pulmonary heart disease	circulatory system											TRUE
245.2	Chronic thyroiditis	endocrine/metabolic											TRUE
707.2	Chronic ulcer of leg or foot	dermatologic											TRUE
707.3	Chronic ulcer of unspecified site	dermatologic											TRUE
441.2	Chronic vascular insufficiency of intestine	circulatory system											TRUE
453	Chronic venous hypertension	circulatory system											TRUE
456	Chronic venous insufficiency [CVI]	circulatory system											TRUE
327.6	Circadian rhythm sleep disorder	neurological											TRUE
459.9	Circulatory disease NEC	circulatory system											TRUE
701.3	Circumscribed scleroderma	dermatologic											TRUE
571.51	Cirrhosis of liver without mention of alcohol	digestive											TRUE
735.22	Claw toe (acquired)	musculoskeletal											TRUE
749.1	Cleft palate	congenital anomalies											TRUE
117.2	Coccidioidomycosis	infectious diseases											TRUE
803.21	Colles' fracture	injuries & poisonings											TRUE
153.2	Colon cancer	neoplasms											TRUE
368.5	Color vision deficiencies	sense organs											TRUE
153	Colorectal cancer	neoplasms											TRUE
348.7	Coma	neurological											TRUE
355	Complex regional/central pain syndrome	neurological											TRUE
859	Complication due to other implant and internal device	injuries & poisonings											TRUE
853	Complication of colostomy or enterostomy	injuries & poisonings											TRUE
858	Complication of internal orthopedic device	injuries & poisonings											TRUE
855	Complication of nervous system device, implant, and graft	injuries & poisonings											TRUE
639	Complications following abortion or ectopic and molar pregnancies	pregnancy complications											TRUE
854	Complications of cardiac/vascular device, implant, and graft	injuries & poisonings											TRUE
536.7	Complications of gastrostomy, colostomy and enterostomy	digestive											TRUE
679	Complications of in utero procedures	pregnancy complications											TRUE
668	Complications of the administration of anesthetic or other sedation in labor and delivery	pregnancy complications											TRUE
817	Concussion	injuries & poisonings											TRUE
656.7	Conditions involving the integument and temperature regulation of fetus and newborn	pregnancy complications											TRUE
312	Conduct disorders	mental disorders											TRUE
756.1	Congenital anomalies of abdominal wall; diaphram	congenital anomalies											TRUE
612.3	Congenital anomalies of breast	genitourinary											TRUE
749	Congenital anomalies of face and neck	congenital anomalies											TRUE
751.1	Congenital anomalies of genital organs	congenital anomalies											TRUE
747.13	Congenital anomalies of great vessels	congenital anomalies											TRUE
750.21	Congenital anomalies of intestine	congenital anomalies											TRUE
755	Congenital anomalies of limbs	congenital anomalies											TRUE
751.12	Congenital anomalies of male genital organs	congenital anomalies											TRUE
750.13	Congenital anomalies of mouth/tongue	congenital anomalies											TRUE
756.3	Congenital anomalies of muscle, tendon, fascia, and connective tissue	congenital anomalies											TRUE
747.2	Congenital anomalies of peripheral vascular system	congenital anomalies											TRUE
753.2	Congenital anomalies of posterior segment of eye	congenital anomalies											TRUE
749.2	Congenital anomalies of skull and face bones	congenital anomalies											TRUE
750.15	Congenital anomalies of stomach	congenital anomalies											TRUE
753	Congenital anomalies of the eye	congenital anomalies											TRUE
757	Congenital anomalies of the integument	congenital anomalies											TRUE
755.4	Congenital anomalies of upper limb, including shoulder girdle	congenital anomalies											TRUE
751.2	Congenital anomalies of urinary system	congenital anomalies											TRUE
755.3	Congenital anomaly of fingers/toes	congenital anomalies											TRUE
750.22	Congenital anomaly of gallbladder, bile ducts, liver, pancreas	congenital anomalies											TRUE
753.1	Congenital cataract and lens anomalies	congenital anomalies											TRUE
286.1	Congenital coagulation defects	hematopoietic											TRUE
286.12	Congenital deficiency of other clotting factors (including factor VII)	hematopoietic											TRUE
755.1	Congenital deformities of feet	congenital anomalies											TRUE
286.13	Congenital factor VIII disorder	hematopoietic											TRUE
755.61	Congenital hip dysplasia and deformity	congenital anomalies											TRUE
750.5	Congenital hypertrophic pyloric stenosis	congenital anomalies											TRUE
244.5	Congenital hypothyroidism	endocrine/metabolic											TRUE
754	Congenital musculoskeletal deformities of spine	congenital anomalies											TRUE
691.3	Congenital pigmentary anomalies of skin	dermatologic											TRUE
428.1	Congestive heart failure (CHF) NOS	circulatory system											TRUE
371.2	Conjunctivitis, noninfectious	sense organs											TRUE
284.2	Constitutional aplastic anemia	hematopoietic											TRUE
939.1	Contact and allergic dermatitis of eyelid	dermatologic											TRUE
931	Contact dermatitis and other eczema due to plants [except food]	dermatologic											TRUE
739	Contracture of joint	musculoskeletal											TRUE
728.71	Contracture of palmar fascia [Dupuytren's disease]	musculoskeletal											TRUE
727.7	Contracture of tendon (sheath)	musculoskeletal											TRUE
364.9	Cornea replaced by transplant	sense organs											TRUE
364.4	Corneal degenerations	sense organs											TRUE
364.5	Corneal dystrophy	sense organs											TRUE
364.2	Corneal edema	sense organs											TRUE
364.1	Corneal opacity	sense organs											TRUE
364	Corneal opacity and other disorders of cornea	sense organs											TRUE
370.1	Corneal ulcer	sense organs											TRUE
733.6	Costochondritis	musculoskeletal											TRUE
771.2	Cramp of limb	symptoms											TRUE
1006	Crushing injury	NULL											TRUE
1008	Crushing or internal injury to organs	NULL											TRUE
737	Curvature of spine	musculoskeletal											TRUE
255.11	Cushing's syndrome	endocrine/metabolic											TRUE
695.41	Cutaneous lupus erythematosus	dermatologic											TRUE
577.3	Cyst and pseudocyst of pancreas	digestive											TRUE
733.2	Cyst of bone	musculoskeletal											TRUE
586.2	Cyst of kidney, acquired	genitourinary											TRUE
528.41	Cyst of the salivary gland	digestive											TRUE
614.53	Cyst or abscess of Bartholin's gland	genitourinary											TRUE
499	Cystic fibrosis	respiratory											TRUE
751.21	Cystic kidney disease	congenital anomalies											TRUE
362.23	Cystoid macular degeneration of retina	sense organs											TRUE
526.1	Cysts of the jaws	digestive											TRUE
302.1	Decreased libido	mental disorders											TRUE
288.1	Decreased white blood cell count	hematopoietic											TRUE
707.1	Decubitus ulcer	dermatologic											TRUE
286.6	Defibrination syndrome	hematopoietic											TRUE
281.9	Deficiency anemias	hematopoietic											TRUE
279.11	Deficiency of humoral immunity	endocrine/metabolic											TRUE
389.3	Degenerative and vascular disorders of ear	sense organs											TRUE
334	Degenerative disease of the spinal cord	neurological											TRUE
702	Degenerative skin conditions and other dermatoses	dermatologic											TRUE
702.4	Degenerative skin disorders	dermatologic											TRUE
259.3	Delay in sexual development and puberty NEC	endocrine/metabolic											TRUE
290	Delirium dementia and amnestic and other cognitive disorders	mental disorders											TRUE
290.2	Delirium due to conditions classified elsewhere	mental disorders											TRUE
521.2	Dental abrasion, erosion and attrition	digestive											TRUE
521.1	Dental caries	digestive											TRUE
524	Dentofacial anomalies, including malocclusion	digestive											TRUE
509.8	Dependence on respirator [Ventilator] or supplemental oxygen	respiratory											TRUE
938	Dermatitis due to solar radiation	dermatologic											TRUE
695.21	Dermatitis herpetiformis	dermatologic											TRUE
709.5	Dermatomyositis	dermatologic											TRUE
110.1	Dermatophytosis	infectious diseases											TRUE
315	Develomental delays and disorders	mental disorders											TRUE
253.3	Diabetes insipidus	endocrine/metabolic											TRUE
250.7	Diabetic retinopathy	endocrine/metabolic											TRUE
741.3	Difficulty in walking	musculoskeletal											TRUE
368.2	Diplopia and disorders of binocular vision	sense organs											TRUE
448	Disease of capillaries	circulatory system											TRUE
394.7	Disease of tricuspid valve	circulatory system											TRUE
529	Diseases and other conditions of the tongue	digestive											TRUE
31	Diseases due to other mycobacteria	infectious diseases											TRUE
530	Diseases of esophagus	digestive											TRUE
521	Diseases of hard tissues of teeth	digestive											TRUE
577	Diseases of pancreas	digestive											TRUE
706	Diseases of sebaceous glands	dermatologic											TRUE
289.5	Diseases of spleen	hematopoietic											TRUE
527	Diseases of the salivary glands	digestive											TRUE
254	Diseases of thymus gland	endocrine/metabolic											TRUE
288	Diseases of white blood cells	hematopoietic											TRUE
279	Disorders involving the immune mechanism	endocrine/metabolic											TRUE
368.7	Disorders of accommodation	sense organs											TRUE
389.5	Disorders of acoustic nerve	sense organs											TRUE
255	Disorders of adrenal glands	endocrine/metabolic											TRUE
270.2	Disorders of amino-acid metabolism	endocrine/metabolic											TRUE
277.4	Disorders of bilirubin excretion	endocrine/metabolic											TRUE
275.5	Disorders of calcium/phosphorus metabolism	endocrine/metabolic											TRUE
724.2	Disorders of coccyx	musculoskeletal											TRUE
275.2	Disorders of copper metabolism	endocrine/metabolic											TRUE
513.8	Disorders of diaphragm	respiratory											TRUE
530.5	Disorders of esophageal motility	digestive											TRUE
380	Disorders of external ear	sense organs											TRUE
379.5	Disorders of iris and ciliary body	sense organs											TRUE
275.1	Disorders of iron metabolism	hematopoietic											TRUE
375	Disorders of lacrimal system	sense organs											TRUE
275	Disorders of mineral metabolism	endocrine/metabolic											TRUE
377	Disorders of optic nerve and visual pathways	sense organs											TRUE
352	Disorders of other cranial nerves	neurological											TRUE
252	Disorders of parathyroid gland	endocrine/metabolic											TRUE
275.53	Disorders of phosphorus metabolism	endocrine/metabolic											TRUE
270.3	Disorders of plasma protein metabolism	endocrine/metabolic											TRUE
277.1	Disorders of porphyrin metabolism	endocrine/metabolic											TRUE
367	Disorders of refraction and accommodation; blindness and low vision	sense organs											TRUE
724.1	Disorders of sacrum	musculoskeletal											TRUE
705	Disorders of sweat glands	dermatologic											TRUE
337	Disorders of the autonomic nervous system	neurological											TRUE
360	Disorders of the globe	sense organs											TRUE
376	Disorders of the orbit	sense organs											TRUE
253	Disorders of the pituitary gland and its hypothalamic control	endocrine/metabolic											TRUE
270.21	Disorders of urea cycle metabolism	endocrine/metabolic											TRUE
588	Disorders resulting from impaired renal function	genitourinary											TRUE
527.7	Disturbance of salivary secretion	digestive											TRUE
520.2	Disturbances in tooth eruption	digestive											TRUE
270.1	Disturbances of amino-acid transport	endocrine/metabolic											TRUE
350.6	Disturbances of sensation of smell and taste	neurological											TRUE
562.2	Diverticulitis	digestive											TRUE
562.1	Diverticulosis	digestive											TRUE
530.6	Diverticulum of esophagus, acquired	digestive											TRUE
362.27	Drusen (degenerative) of retina	sense organs											TRUE
531.3	Duodenal ulcer	digestive											TRUE
535.6	Duodenitis	digestive											TRUE
620	Dysplasia of female genital organs	genitourinary											TRUE
624.1	Dystrophy of female genital tract	genitourinary											TRUE
41.4	E. coli	infectious diseases											TRUE
305.2	Eating disorder	mental disorders											TRUE
634.3	Ectopic pregnancy	pregnancy complications											TRUE
374.1	Ectropion or entropion	sense organs											TRUE
1014	Effects of heat, cold and air pressure	NULL											TRUE
990	Effects radiation NOS	injuries & poisonings											TRUE
276.1	Electrolyte imbalance	endocrine/metabolic											TRUE
790.8	Elevated C-reactive protein (CRP)	symptoms											TRUE
795.82	Elevated cancer antigen 125 [CA 125]	symptoms											TRUE
790.1	Elevated sedimentation rate	symptoms											TRUE
444.2	Embolism and thrombosis of abdominal aorta	circulatory system											TRUE
496.1	Emphysema	respiratory											TRUE
506	Empyema and pneumothorax	respiratory											TRUE
323	Encephalitis	neurological											TRUE
323.8	Encephalitis, non-infectious	neurological											TRUE
348.8	Encephalopathy, not elsewhere classified	neurological											TRUE
585.32	End stage renal disease	genitourinary											TRUE
420.3	Endocarditis	circulatory system											TRUE
656.3	Endocrine and metabolic disturbances of fetus and newborn	pregnancy complications											TRUE
621	Endometrial hyperplasia	genitourinary											TRUE
288.3	Eosinophilia	hematopoietic											TRUE
530.15	Eosinophilic esophagitis	digestive											TRUE
345.1	Epilepsy	neurological											TRUE
375.2	Epiphora	sense organs											TRUE
605	Erectile dysfunction [ED]	genitourinary											TRUE
695.81	Erythema nodosum	dermatologic											TRUE
690	Erythematosquamous dermatosis	dermatologic											TRUE
530.2	Esophageal bleeding (varices/hemorrhage)	digestive											TRUE
530.1	Esophagitis, GERD and related diseases	digestive											TRUE
333.1	Essential tremor	neurological											TRUE
242.3	Exophthalmos	endocrine/metabolic											TRUE
333	Extrapyramidal disease and abnormal movement disorders	neurological											TRUE
500.1	Extrinsic allergic alveolitis	respiratory											TRUE
352.2	Facial nerve disorders [CN7]	neurological											TRUE
772.6	Facial weakness	symptoms											TRUE
264.2	Failure to thrive (childhood)	endocrine/metabolic											TRUE
550.3	Femoral hernia	digestive											TRUE
610.2	Fibroadenosis of breast	genitourinary											TRUE
610.3	Fibrosclerosis of breast	genitourinary											TRUE
426.21	First degree AV block	circulatory system											TRUE
735.1	Flat foot	musculoskeletal											TRUE
803.3	Fracture of clavicle or scapula	injuries & poisonings											TRUE
801.1	Fracture of foot	injuries & poisonings											TRUE
803.1	Fracture of humerus	injuries & poisonings											TRUE
800	Fracture of lower limb	injuries & poisonings											TRUE
800.1	Fracture of neck of femur	injuries & poisonings											TRUE
800.4	Fracture of patella	injuries & poisonings											TRUE
802	Fracture of pelvis	injuries & poisonings											TRUE
803.2	Fracture of radius and ulna	injuries & poisonings											TRUE
807	Fracture of ribs	injuries & poisonings											TRUE
800.3	Fracture of tibia and fibula	injuries & poisonings											TRUE
809	Fracture of unspecified bones	injuries & poisonings											TRUE
800.2	Fracture of unspecified part of femur	injuries & poisonings											TRUE
803	Fracture of upper limb	injuries & poisonings											TRUE
805	Fracture of vertebral column without mention of spinal cord injury	injuries & poisonings											TRUE
564	Functional digestive disorders	digestive											TRUE
612.1	Galactorrhea	genitourinary											TRUE
791	Gangrene	symptoms											TRUE
531.2	Gastric ulcer	digestive											TRUE
530.7	Gastroesophageal laceration-hemorrhage syndrome	digestive											TRUE
569.2	Gastrointestinal complications	digestive											TRUE
303.31	Gastrointestinal malfunction arising from mental factors	mental disorders											TRUE
531.5	Gastrojejunal ulcer	digestive											TRUE
345.11	Generalized convulsive epilepsy	neurological											TRUE
736.4	Genu valgum or varum (acquired)	musculoskeletal											TRUE
523	Gingival and periodontal diseases	digestive											TRUE
523.1	Gingivitis	digestive											TRUE
529.1	Glossitis	digestive											TRUE
529.6	Glossodynia	digestive											TRUE
255.21	Glucocorticoid deficiency	endocrine/metabolic											TRUE
250.5	Glycosuria or Acetonuria	endocrine/metabolic											TRUE
90.2	Gonococcal infections	infectious diseases											TRUE
274.1	Gout	endocrine/metabolic											TRUE
274.11	Gouty arthropathy	endocrine/metabolic											TRUE
81.1	Graft-versus-host disease	infectious diseases											TRUE
38.1	Gram negative septicemia	infectious diseases											TRUE
38.2	Gram positive septicemia	infectious diseases											TRUE
593.1	Gross hematuria	genitourinary											TRUE
41.8	H. pylori	infectious diseases											TRUE
292.6	Hallucinations	mental disorders											TRUE
735.23	Hallux rigidus	musculoskeletal											TRUE
735.21	Hammer toe (acquired)	musculoskeletal											TRUE
428.2	Heart failure NOS	circulatory system											TRUE
428.4	Heart failure with preserved EF [Diastolic heart failure]	circulatory system											TRUE
428.3	Heart failure with reduced EF [Systolic or combined heart failure]	circulatory system											TRUE
429.1	Heart transplant/surgery	circulatory system											TRUE
395	Heart valve disorders	circulatory system											TRUE
395.6	Heart valve replaced	circulatory system											TRUE
134	Helminthiases	infectious diseases											TRUE
741.5	Hemarthrosis	musculoskeletal											TRUE
578.1	Hematemesis	digestive											TRUE
656.5	Hematological disorders of newborn	pregnancy complications											TRUE
342	Hemiplegia	neurological											TRUE
285.8	Hemoglobinuria	hematopoietic											TRUE
635	Hemorrhage during pregnancy; childbirth and postpartum	pregnancy complications											TRUE
531.1	Hemorrhage from gastrointestinal ulcer	digestive											TRUE
656.4	Hemorrhage of fetus or newborn	pregnancy complications											TRUE
578.9	Hemorrhage of gastrointestinal tract	digestive											TRUE
286.5	Hemorrhagic disorder due to intrinsic circulating anticoagulants	hematopoietic											TRUE
70.9	Hepatitis NOS	infectious diseases											TRUE
573.3	Hepatomegaly	digestive											TRUE
356	Hereditary and idiopathic peripheral neuropathy	neurological											TRUE
520.1	Hereditary disturbances in tooth structure	digestive											TRUE
275.11	Hereditary hemochromatosis	hematopoietic											TRUE
362.7	Hereditary retinal dystrophies	sense organs											TRUE
53.1	Herpes zoster with nervous system complications	infectious diseases											TRUE
117.1	Histoplasmosis	infectious diseases											TRUE
71.1	HIV infection, symptomatic	infectious diseases											TRUE
201	Hodgkin's disease	neoplasms											TRUE
962.3	Hormones and synthetic substitutes causing adverse effects in therapeutic use	injuries & poisonings											TRUE
71	Human immunodeficiency virus [HIV] disease	infectious diseases											TRUE
603.1	Hydrocele	genitourinary											TRUE
331.1	Hydrocephalus	neurological											TRUE
255.12	Hyperaldosteronism	endocrine/metabolic											TRUE
275.6	Hypercalcemia	endocrine/metabolic											TRUE
272.14	Hyperchylomicronemia	endocrine/metabolic											TRUE
286.8	Hypercoagulable state	hematopoietic											TRUE
256.1	Hyperestrogenism	endocrine/metabolic											TRUE
272.12	Hyperglyceridemia	endocrine/metabolic											TRUE
276.11	Hyperosmolality and/or hypernatremia	endocrine/metabolic											TRUE
252.1	Hyperparathyroidism	endocrine/metabolic											TRUE
276.13	Hyperpotassemia	endocrine/metabolic											TRUE
446.3	Hypersensitivity angiitis	circulatory system											TRUE
327.1	Hypersomnia	neurological											TRUE
401	Hypertension	circulatory system											TRUE
401.2	Hypertensive heart and/or renal disease	circulatory system											TRUE
401.21	Hypertensive heart disease	circulatory system											TRUE
425.11	Hypertrophic obstructive cardiomyopathy	circulatory system											TRUE
612.2	Hypertrophy of breast (Gynecomastia)	genitourinary											TRUE
527.1	Hypertrophy of salivary gland	digestive											TRUE
513.4	Hyperventilation	respiratory											TRUE
251.1	Hypoglycemia	endocrine/metabolic											TRUE
252.2	Hypoparathyroidism	endocrine/metabolic											TRUE
458	Hypotension	circulatory system											TRUE
780	Hypothermia/Chills	symptoms											TRUE
360.3	Hypotony of eye	sense organs											TRUE
513.3	Hypoventilation	respiratory											TRUE
258	Iatrogenic endocrine disorders	endocrine/metabolic											TRUE
458.2	Iatrogenic hypotension	circulatory system											TRUE
452.1	Iatrogenic pulmonary embolism and infarction	circulatory system											TRUE
691.1	Ichthyosis congenita	dermatologic											TRUE
504.1	Idiopathic fibrosing alveolitis	respiratory											TRUE
559	Ileostomy status	digestive											TRUE
560.2	Impaction of intestine	digestive											TRUE
686.2	Impetigo	dermatologic											TRUE
312.3	Impulse control disorder	mental disorders											TRUE
550.6	Incisional hernia	digestive											TRUE
343	Infantile cerebral palsy	neurological											TRUE
369	Infection of the eye	sense organs											TRUE
41.9	Infection with drug-resistant microorganisms	infectious diseases											TRUE
81	Infection/inflammation of internal prosthetic device; implant; and graft	infectious diseases											TRUE
657	Infections specific to the perinatal period	pregnancy complications											TRUE
79.2	Infectious mononucleosis	infectious diseases											TRUE
712	Infective connective tissue disorders	musculoskeletal											TRUE
609.1	Infertility, male	genitourinary											TRUE
132	Infestation (lice, mites)	infectious diseases											TRUE
371	Inflammation of the eye	sense organs											TRUE
526.5	Inflammatory conditions of jaw	digestive											TRUE
614.5	Inflammatory disease of cervix, vagina, and vulva	genitourinary											TRUE
614	Inflammatory diseases of female pelvic organs	genitourinary											TRUE
942	Infusion and transfusion reaction	injuries & poisonings											TRUE
703.1	Ingrowing nail	dermatologic											TRUE
550.1	Inguinal hernia	digestive											TRUE
907	Injuries to the nervous system	injuries & poisonings											TRUE
1007	Injury to blood vessels	NULL											TRUE
957	Injury to other and unspecified nerves	injuries & poisonings											TRUE
250.3	Insulin pump user	endocrine/metabolic											TRUE
722.7	Intervertebral disc disorder with myelopathy	musculoskeletal											TRUE
134.1	Intestinal helminthiases	infectious diseases											TRUE
8	Intestinal infection	infectious diseases											TRUE
8.52	Intestinal infection due to C. difficile	infectious diseases											TRUE
8.7	Intestinal infection due to protozoa	infectious diseases											TRUE
557	Intestinal malabsorption (non-celiac)	digestive											TRUE
430.2	Intracerebral hemorrhage	circulatory system											TRUE
430	Intracranial hemorrhage	circulatory system											TRUE
818	Intracranial hemorrhage (injury)	injuries & poisonings											TRUE
656.1	Isoimmunization of fetus or newborn	pregnancy complications											TRUE
573.5	Jaundice (not of newborn)	digestive											TRUE
732.1	Juvenile osteochondrosis	musculoskeletal											TRUE
714.2	Juvenile rheumatoid arthritis	musculoskeletal											TRUE
370	Keratitis	sense organs											TRUE
370.3	Keratoconjunctivitis	sense organs											TRUE
364.41	Keratoconus	sense organs											TRUE
701.1	Keratoderma, acquired	dermatologic											TRUE
737.1	Kyphosis (acquired)	musculoskeletal											TRUE
386.3	Labyrinthitis	sense organs											TRUE
350.3	Lack of coordination	neurological											TRUE
264.9	Lack of normal physiological development, unspecified	endocrine/metabolic											TRUE
374.2	Lagophthalmos	sense organs											TRUE
202.24	Large cell lymphoma	neoplasms											TRUE
1012	Late effect	NULL											TRUE
433.8	Late effects of cerebrovascular disease	circulatory system											TRUE
728.2	Laxity of ligament or hypermobility syndrome	musculoskeletal											TRUE
315.1	Learning disorder	mental disorders											TRUE
426.32	Left bundle branch block	circulatory system											TRUE
204	Leukemia	neoplasms											TRUE
528.6	Leukoplakia of oral mucosa	digestive											TRUE
277.51	Lipoprotein disorders	endocrine/metabolic											TRUE
571.8	Liver abscess and sequelae of chronic liver disease	digestive											TRUE
573.2	Liver replaced by transplant	digestive											TRUE
278.3	Localized adiposity	endocrine/metabolic											TRUE
742.1	Loose body in joint	musculoskeletal											TRUE
737.2	Lordosis (acquired)	musculoskeletal											TRUE
525.1	Loss of teeth or edentulism	digestive											TRUE
754.1	Lumbosacral spondylolysis, congenital	congenital anomalies											TRUE
500	Lung disease due to external agents	respiratory											TRUE
510.2	Lung transplant	respiratory											TRUE
695.4	Lupus (localized and systemic)	dermatologic											TRUE
130.1	Lyme disease	infectious diseases											TRUE
204.11	Lymphoid leukemia, acute	neoplasms											TRUE
204.12	Lymphoid leukemia, chronic	neoplasms											TRUE
202.23	Lymphosarcoma	neoplasms											TRUE
362.29	Macular degeneration (senile) of retina NOS	sense organs											TRUE
362.26	Macular puckering of retina	sense organs											TRUE
189.21	Malignant neoplasm of bladder	neoplasms											TRUE
189.11	Malignant neoplasm of kidney, except pelvis	neoplasms											TRUE
155.1	Malignant neoplasm of liver, primary	neoplasms											TRUE
189.4	Malignant neoplasm of other urinary organs	neoplasms											TRUE
184.11	Malignant neoplasm of ovary	neoplasms											TRUE
153.3	Malignant neoplasm of rectum, rectosigmoid junction, and anus	neoplasms											TRUE
159.4	Malignant neoplasm of retroperitoneum and peritoneum	neoplasms											TRUE
159.2	Malignant neoplasm of small intestine, including duodenum	neoplasms											TRUE
182	Malignant neoplasm of uterus	neoplasms											TRUE
195.1	Malignant neoplasm, other	neoplasms											TRUE
733.8	Malunion and nonunion of fracture	musculoskeletal											TRUE
611.11	Mammographic microcalcification	genitourinary											TRUE
191	Manlignant and unknown neoplasms of brain and nervous system	neoplasms											TRUE
381.3	Mastoiditis & related conditions	sense organs											TRUE
255.13	Medulloadrenal hyperfunction	endocrine/metabolic											TRUE
281.1	Megaloblastic anemia	hematopoietic											TRUE
172.11	Melanomas of skin	neoplasms											TRUE
292.3	Memory loss	mental disorders											TRUE
386.1	Meniere's disease	sense organs											TRUE
320	Meningitis	neurological											TRUE
315.3	Mental retardation	mental disorders											TRUE
41.12	Methicillin resistant Staphylococcus aureus	infectious diseases											TRUE
41.11	Methicillin sensitive Staphylococcus aureus	infectious diseases											TRUE
292.2	Mild cognitive impairment	mental disorders											TRUE
634.1	Missed abortion/Hydatidiform mole	pregnancy complications											TRUE
394.2	Mitral valve disease	circulatory system											TRUE
394.1	Mitral valve stenosis and aortic valve stenosis	circulatory system											TRUE
626.21	Mittelschmerz	genitourinary											TRUE
272.13	Mixed hyperlipidemia	endocrine/metabolic											TRUE
204.3	Monocytic leukemia	neoplasms											TRUE
433.32	Moyamoya disease	circulatory system											TRUE
480.13	MRSA pneumonia	respiratory											TRUE
204.4	Multiple myeloma	neoplasms											TRUE
772.3	Muscle weakness	symptoms											TRUE
728.1	Muscular calcification and ossification	musculoskeletal											TRUE
359.1	Muscular dystrophies	neurological											TRUE
772.1	Muscular wasting and disuse atrophy	symptoms											TRUE
358.1	Myasthenia gravis	neurological											TRUE
117	Mycoses	infectious diseases											TRUE
204.2	Myeloid leukemia	neoplasms											TRUE
204.21	Myeloid leukemia, acute	neoplasms											TRUE
204.22	Myeloid leukemia, chronic	neoplasms											TRUE
200	Myeloproliferative disease	neoplasms											TRUE
411.2	Myocardial infarction	circulatory system											TRUE
420.1	Myocarditis	circulatory system											TRUE
333.2	Myoclonus	neurological											TRUE
359.2	Myopathy	neurological											TRUE
384.1	Myringitis	sense organs											TRUE
471	Nasal polyps	respiratory											TRUE
174.3	Neoplasm of uncertain behavior of breast	neoplasms											TRUE
158	Neoplasm of unspecified nature of digestive system	neoplasms											TRUE
580.31	Nephritis and nephropathy in diseases classified elsewhere	genitourinary											TRUE
580.2	Nephrotic syndrome without mention of glomerulonephritis	genitourinary											TRUE
353.1	Nerve plexus lesions	neurological											TRUE
353	Nerve root and plexus disorders	neurological											TRUE
353.2	Nerve root lesions	neurological											TRUE
752	Nervous system congenital anomalies	congenital anomalies											TRUE
752.1	Neural tube defects	congenital anomalies											TRUE
209	Neuroendocrine tumors	neoplasms											TRUE
199.4	Neurofibromatosis	neoplasms											TRUE
202.21	Nodular lymphoma	neoplasms											TRUE
283.2	Non-autoimmune hemolytic anemias	hematopoietic											TRUE
875	Non-healing surgical wound	injuries & poisonings											TRUE
202.2	Non-Hodgkins lymphoma	neoplasms											TRUE
580.12	Non-proliferative glomerulonephritis	genitourinary											TRUE
769	Nonallopathic lesions NEC	symptoms											TRUE
371.33	Noninfectious dermatoses of eyelid	sense organs											TRUE
450	Noninfectious disorders of lymphatic channels	circulatory system											TRUE
395.2	Nonrheumatic aortic valve disorders	circulatory system											TRUE
395.4	Nonrheumatic pulmonary valve disorders	circulatory system											TRUE
395.3	Nonrheumatic tricuspid valve disorders	circulatory system											TRUE
366.1	Nonsenile Cataract	sense organs											TRUE
346.3	Nonspecific abnormal findings in cerebrospinal fluid	neurological											TRUE
575.9	Nonspecific abnormal findings on radiological and other examination of biliary tract	digestive											TRUE
346.2	Nonspecific abnormal results of function study of brain and central nervous system	neurological											TRUE
259.1	Nonspecific abnormal results of other endocrine function study	endocrine/metabolic											TRUE
790	Nonspecific findings on examination of blood	symptoms											TRUE
729.7	Nontraumatic compartment syndrome	musculoskeletal											TRUE
260.22	Nutritional marasmus	endocrine/metabolic											TRUE
378.2	Nystagmus and other irregular eye movements	sense organs											TRUE
496.21	Obstructive chronic bronchitis	respiratory											TRUE
751.3	Obstructive genitourinary defect	congenital anomalies											TRUE
433.1	Occlusion and stenosis of precerebral arteries	circulatory system											TRUE
433.2	Occlusion of cerebral arteries	circulatory system											TRUE
433.11	Occlusion of cerebral arteries, with cerebral infarction	circulatory system											TRUE
599.6	Oliguria and anuria	genitourinary											TRUE
870.2	Open wound of ear	injuries & poisonings											TRUE
871.3	Open wound of foot except toe(s) alone	injuries & poisonings											TRUE
871.1	Open wound of hand except finger(s)	injuries & poisonings											TRUE
870.5	Open wound of lip and mouth	injuries & poisonings											TRUE
870.6	Open wound of neck	injuries & poisonings											TRUE
871.4	Open wound of toe(s)	injuries & poisonings											TRUE
870.1	Open wound or laceration of eye or eyelid	injuries & poisonings											TRUE
871	Open wounds of extremities	injuries & poisonings											TRUE
870	Open wounds of head; neck; and trunk	injuries & poisonings											TRUE
365.1	Open-angle glaucoma	sense organs											TRUE
965.1	Opiates and related narcotics causing adverse effects in therapeutic use	injuries & poisonings											TRUE
377.1	Optic atrophy	sense organs											TRUE
377.3	Optic neuritis/neuropathy	sense organs											TRUE
528.12	Oral aphthae	digestive											TRUE
327.41	Organic or persistent insomnia	neurological											TRUE
513.32	Orthopnea	respiratory											TRUE
458.1	Orthostatic hypotension	circulatory system											TRUE
731	Osteitis deformans and osteopathies associated with other disorders classified elsewhere	musculoskeletal											TRUE
740.1	Osteoarthritis; localized	musculoskeletal											TRUE
740.3	Osteoarthrosis involving more than one site, but not specified as generalized	musculoskeletal											TRUE
740.12	Osteoarthrosis, localized, secondary	musculoskeletal											TRUE
732.7	Osteochondritis dissecans	musculoskeletal											TRUE
732	Osteochondropathies	musculoskeletal											TRUE
710.1	Osteomyelitis	musculoskeletal											TRUE
710	Osteomyelitis, periostitis, and other infections involving bone	musculoskeletal											TRUE
743.11	Osteoporosis NOS	musculoskeletal											TRUE
736	Other acquired deformities of limbs	musculoskeletal											TRUE
411.9	Other acute and subacute forms of ischemic heart disease	circulatory system											TRUE
721.8	Other allied disorders of spine	musculoskeletal											TRUE
504	Other alveolar and parietoalveolar pneumonopathy	respiratory											TRUE
722.9	Other and unspecified disc disorder	musculoskeletal											TRUE
349	Other and unspecified disorders of the nervous system	neurological											TRUE
442	Other aneurysm	circulatory system											TRUE
716	Other arthropathies	musculoskeletal											TRUE
426.8	Other cardiac conduction disorders	circulatory system											TRUE
425.8	Other cardiomyopathy	circulatory system											TRUE
598.4	Other cells and casts in urine	genitourinary											TRUE
331	Other cerebral degenerations	neurological											TRUE
411.8	Other chronic ischemic heart disease, unspecified	circulatory system											TRUE
324	Other CNS infection and poliomyelitis	neurological											TRUE
348	Other conditions of brain	neurological											TRUE
348.9	Other conditions of brain, NOS	neurological											TRUE
755.6	Other congenital anomalies of lower limb, including pelvic girdle	congenital anomalies											TRUE
756	Other congenital musculoskeletal anomalies	congenital anomalies											TRUE
277.6	Other deficiencies of circulating enzymes	endocrine/metabolic											TRUE
281	Other deficiency anemia	hematopoietic											TRUE
341	Other demyelinating diseases of central nervous system	neurological											TRUE
510	Other diseases of lung	respiratory											TRUE
519.8	Other diseases of respiratory system, NEC	respiratory											TRUE
519	Other diseases of respiratory system, not elsewhere classified	respiratory											TRUE
575.8	Other disorders of biliary tract	digestive											TRUE
596	Other disorders of bladder	genitourinary											TRUE
271.9	Other disorders of carbohydrate transport and metabolism	endocrine/metabolic											TRUE
723	Other disorders of cervical region	musculoskeletal											TRUE
459	Other disorders of circulatory system	circulatory system											TRUE
575.7	Other disorders of gallbladder	digestive											TRUE
277.5	Other disorders of lipoid metabolism	endocrine/metabolic											TRUE
277	Other disorders of metabolism	endocrine/metabolic											TRUE
385	Other disorders of middle ear and mastoid	sense organs											TRUE
253.7	Other disorders of neurohypophysis	endocrine/metabolic											TRUE
251	Other disorders of pancreatic internal secretion	endocrine/metabolic											TRUE
277.2	Other disorders of purine and pyrimidine metabolism	endocrine/metabolic											TRUE
727	Other disorders of synovium, tendon, and bursa	musculoskeletal											TRUE
384	Other disorders of tympanic membrane	sense organs											TRUE
597	Other disorders of urethra and urinary tract	genitourinary											TRUE
426.25	Other heart block	circulatory system											TRUE
282.9	Other hereditary hemolytic anemias	hematopoietic											TRUE
425.12	Other hypertrophic cardiomyopathy	circulatory system											TRUE
715	Other inflammatory spondylopathies	musculoskeletal											TRUE
560.4	Other intestinal obstruction	digestive											TRUE
306	Other mental disorder	mental disorders											TRUE
172.2	Other non-epithelial cancer of skin	neoplasms											TRUE
362.3	Other nondiabetic retinopathy	sense organs											TRUE
613	Other nonmalignant breast conditions	genitourinary											TRUE
263	Other nutritional deficiency	endocrine/metabolic											TRUE
870.3	Other open wound of head and face	injuries & poisonings											TRUE
344	Other paralytic syndromes	neurological											TRUE
290.3	Other persistent mental disorders due to conditions classified elsewhere	mental disorders											TRUE
505	Other pulmonary inflamation or edema	respiratory											TRUE
362	Other retinal disorders	sense organs											TRUE
751.22	Other specified congenital anomalies of kidney	congenital anomalies											TRUE
752.2	Other specified congenital anomalies of nervous system	congenital anomalies											TRUE
709.6	Other specified diffuse diseases of connective tissue	dermatologic											TRUE
527.8	Other specified diseases of the salivary glands	digestive											TRUE
270.38	Other specified disorders of plasma protein metabolism	endocrine/metabolic											TRUE
535.8	Other specified gastritis	digestive											TRUE
743.13	Other specified osteoporosis	musculoskeletal											TRUE
443.8	Other specified peripheral vascular diseases	circulatory system											TRUE
724.8	Other symptoms referable to back	musculoskeletal											TRUE
724.9	Other unspecified back disorders	musculoskeletal											TRUE
281.12	Other vitamin B12 deficiency anemia	hematopoietic											TRUE
381.9	Otorrhea	sense organs											TRUE
383	Otosclerosis	sense organs											TRUE
278	Overweight, obesity and other hyperalimentation	endocrine/metabolic											TRUE
716.8	Palindromic rheumatism	musculoskeletal											TRUE
782.6	Pallor and flushing	symptoms											TRUE
157	Pancreatic cancer	neoplasms											TRUE
284.1	Pancytopenia	hematopoietic											TRUE
729.3	Panniculitis	musculoskeletal											TRUE
473.3	Paralysis/spasm of vocal cords or larynx	respiratory											TRUE
560.1	Paralytic ileus	digestive											TRUE
378.5	Paralytic strabismus	sense organs											TRUE
295.2	Paranoid disorders	mental disorders											TRUE
270.32	Paraproteinemia	endocrine/metabolic											TRUE
696.2	Parapsoriasis	dermatologic											TRUE
327.5	Parasomnia	neurological											TRUE
332	Parkinson's disease	neurological											TRUE
427.1	Paroxysmal tachycardia, unspecified	circulatory system											TRUE
345.12	Partial epilepsy	neurological											TRUE
743.2	Pathologic fracture	musculoskeletal											TRUE
743.22	Pathologic fracture of femur	musculoskeletal											TRUE
743.21	Pathologic fracture of vertebrae	musculoskeletal											TRUE
742.2	Pathological, developmental or recurrent dislocation	musculoskeletal											TRUE
756.2	Pectus and other congenital anomalies of ribs/sternum	congenital anomalies											TRUE
756.21	Pectus excavatum	congenital anomalies											TRUE
132.1	Pediculosis and phthirus infestation	infectious diseases											TRUE
614.3	Pelvic inflammatory disease (PID)	genitourinary											TRUE
695.22	Pemphigus and pemphigoid	dermatologic											TRUE
531.4	Peptic ulcer, site unspecified	digestive											TRUE
384.4	Perforation of tympanic membrane	sense organs											TRUE
522.5	Periapical abscess	digestive											TRUE
420.2	Pericarditis	circulatory system											TRUE
656.6	Perinatal disorders of digestive system	pregnancy complications											TRUE
656.8	Perinatal jaundice	pregnancy complications											TRUE
337.1	Peripheral autonomic neuropathy	neurological											TRUE
362.6	Peripheral retinal degenerations	sense organs											TRUE
443.9	Peripheral vascular disease, unspecified	circulatory system											TRUE
560.3	Peritoneal or intestinal adhesions	digestive											TRUE
567	Peritonitis and retroperitoneal infections	digestive											TRUE
281.11	Pernicious anemia	hematopoietic											TRUE
789.1	Persistent vomiting	symptoms											TRUE
301	Personality disorders	mental disorders											TRUE
313	Pervasive developmental disorders	mental disorders											TRUE
270.12	Phenylketonuria [PKU]	endocrine/metabolic											TRUE
325	Phlebitis and thrombophlebitis of intracranial venous sinuses	neurological											TRUE
451.2	Phlebitis and thrombophlebitis of lower extremities	circulatory system											TRUE
686.3	Pilonidal cyst	dermatologic											TRUE
253.5	Pituitary dwarfism	endocrine/metabolic											TRUE
253.2	Pituitary hypofunction	endocrine/metabolic											TRUE
696.3	Pityriasis	dermatologic											TRUE
727.8	Plica syndrome	musculoskeletal											TRUE
480.11	Pneumococcal pneumonia	respiratory											TRUE
480.3	Pneumonia due to fungus (mycoses)	respiratory											TRUE
501	Pneumonitis due to inhalation of food or vomitus	respiratory											TRUE
975	Poisoning by agents primarily acting on the smooth and skeletal muscles and respiratory system	injuries & poisonings											TRUE
965	Poisoning by analgesics, antipyretics, and antirheumatics	injuries & poisonings											TRUE
960	Poisoning by antibiotics	injuries & poisonings											TRUE
966	Poisoning by anticonvulsants and anti-Parkinsonism drugs	injuries & poisonings											TRUE
971	Poisoning by drugs primarily affecting the autonomic nervous system	injuries & poisonings											TRUE
962	Poisoning by hormones and synthetic substitutes	injuries & poisonings											TRUE
961	Poisoning by other anti-infectives	injuries & poisonings											TRUE
963	Poisoning by primarily systemic agents	injuries & poisonings											TRUE
969	Poisoning by psychotropic agents	injuries & poisonings											TRUE
446.6	Polyarteritis nodosa	circulatory system											TRUE
270.31	Polyclonal hypergammaglobulinemia	endocrine/metabolic											TRUE
200.1	Polycythemia vera	neoplasms											TRUE
289.8	Polycythemia, secondary	hematopoietic											TRUE
276.8	Polydipsia	endocrine/metabolic											TRUE
259.8	Polyglandular activity in multiple endocrine adenomatosis	endocrine/metabolic											TRUE
717	Polymyalgia Rheumatica	musculoskeletal											TRUE
709.4	Polymyositis	dermatologic											TRUE
316.1	Polyneuropathy due to drugs	mental disorders											TRUE
250.6	Polyneuropathy in diabetes	endocrine/metabolic											TRUE
622	Polyp of female genital organs	genitourinary											TRUE
571.81	Portal hypertension	digestive											TRUE
258.1	Postablative ovarian failure	endocrine/metabolic											TRUE
502	Postinflammatory pulmonary fibrosis	respiratory											TRUE
722.8	Postlaminectomy syndrome	musculoskeletal											TRUE
627.1	Postmenopausal bleeding	genitourinary											TRUE
80	Postoperative infection	infectious diseases											TRUE
958.1	Postoperative shock	injuries & poisonings											TRUE
452.8	Postphlebitic syndrome	circulatory system											TRUE
783.1	Postprocedural fever	symptoms											TRUE
876	Posttraumatic wound infection not elsewhere classified	injuries & poisonings											TRUE
259.4	Precocious sexual development and puberty NEC	endocrine/metabolic											TRUE
627.4	Premenopausal menorrhagia	genitourinary											TRUE
367.4	Presbyopia	sense organs											TRUE
365.2	Primary angle-closure glaucoma	sense organs											TRUE
571.6	Primary biliary cirrhosis	digestive											TRUE
365.11	Primary open angle glaucoma	sense organs											TRUE
415.21	Primary pulmonary hypertension	circulatory system											TRUE
360.2	Progressive myopia	sense organs											TRUE
580.11	Proliferative glomerulonephritis	genitourinary											TRUE
260	Protein-calorie malnutrition	endocrine/metabolic											TRUE
131	Protozoan infection	infectious diseases											TRUE
480.12	Pseudomonal pneumonia	respiratory											TRUE
696.4	Psoriasis	dermatologic											TRUE
696.42	Psoriatic arthropathy	dermatologic											TRUE
368.91	Psychophysical visual disturbances	sense organs											TRUE
295.3	Psychosis	mental disorders											TRUE
374.3	Ptosis of eyelid	sense organs											TRUE
415.11	Pulmonary embolism and infarction, acute	circulatory system											TRUE
415	Pulmonary heart disease	circulatory system											TRUE
509.3	Pulmonary insufficiency or respiratory failure following trauma and surgery	respiratory											TRUE
522.1	Pulpitis and necrosis of tooth pulp	digestive											TRUE
686.5	Pyoderma	dermatologic											TRUE
711.1	Pyogenic arthritis	musculoskeletal											TRUE
686.4	Pyogenic granuloma	dermatologic											TRUE
287.4	Qualitative platelet defects	hematopoietic											TRUE
530.14	Reflux esophagitis	digestive											TRUE
711.2	Reiter's disease	musculoskeletal											TRUE
594.8	Renal colic	genitourinary											TRUE
585.31	Renal dialysis	genitourinary											TRUE
585.2	Renal failure NOS	genitourinary											TRUE
588.1	Renal osteodystrophy	genitourinary											TRUE
580.4	Renal sclerosis, NOS	genitourinary											TRUE
513	Respiratory abnormalities	respiratory											TRUE
509.5	Respiratory arrest	respiratory											TRUE
519.2	Respiratory complications	respiratory											TRUE
656.2	Respiratory conditions of fetus and newborn	pregnancy complications											TRUE
509.1	Respiratory failure	respiratory											TRUE
509	Respiratory failure, insufficiency, arrest	respiratory											TRUE
509.2	Respiratory insufficiency	respiratory											TRUE
202.22	Reticulosarcoma	neoplasms											TRUE
361.1	Retinal detachment with retinal defect	sense organs											TRUE
361	Retinal detachments and defects	sense organs											TRUE
362.9	Retinal edema	sense organs											TRUE
362.8	Retinal hemorrhage/ischemia	sense organs											TRUE
362.4	Retinal vascular changes and abnomalities	sense organs											TRUE
362.1	Retinopathy of prematurity	sense organs											TRUE
361.2	Retinoschisis and retinal cysts	sense organs											TRUE
772.4	Rhabdomyolysis	symptoms											TRUE
394	Rheumatic disease of the heart valves	circulatory system											TRUE
729.1	Rheumatism, unspecified and fibrositis	musculoskeletal											TRUE
714	Rheumatoid arthritis and other inflammatory polyarthropathies	musculoskeletal											TRUE
261.41	Rickets or osteomalacia	endocrine/metabolic											TRUE
426.31	Right bundle branch block	circulatory system											TRUE
840.2	Rotator cuff (capsule) sprain	injuries & poisonings											TRUE
727.5	Rupture of synovium	musculoskeletal											TRUE
727.6	Rupture of tendon, nontraumatic	musculoskeletal											TRUE
715.1	Sacroiliitis NEC	musculoskeletal											TRUE
697	Sarcoidosis	dermatologic											TRUE
301.1	Schizoid personality disorder	mental disorders											TRUE
295.1	Schizophrenia	mental disorders											TRUE
295	Schizophrenia and other psychotic disorders	mental disorders											TRUE
722.3	Schmorl's nodes	musculoskeletal											TRUE
379.1	Scleritis and episcleritis	sense organs											TRUE
706.3	Seborrhea	dermatologic											TRUE
426.23	Second degree AV block	circulatory system											TRUE
249	Secondary diabetes mellitus	endocrine/metabolic											TRUE
588.2	Secondary hyperparathyroidism (of renal origin)	genitourinary											TRUE
198.6	Secondary malignancy of bone	neoplasms											TRUE
198.5	Secondary malignancy of brain/spine	neoplasms											TRUE
198.1	Secondary malignancy of lymph nodes	neoplasms											TRUE
198.2	Secondary malignancy of respiratory organs	neoplasms											TRUE
198	Secondary malignant neoplasm	neoplasms											TRUE
198.3	Secondary malignant neoplasm of digestive systems	neoplasms											TRUE
198.4	Secondary malignant neoplasm of liver	neoplasms											TRUE
198.7	Secondary malignant neoplasm of skin	neoplasms											TRUE
425.2	Secondary/extrinsic cardiomyopathies	circulatory system											TRUE
366.2	Senile cataract	sense organs											TRUE
362.31	Separation of retinal layers	sense organs											TRUE
994.21	Septic shock	injuries & poisonings											TRUE
260.2	severe protein-calorie malnutrition	endocrine/metabolic											TRUE
302	Sexual and gender identity disorders	mental disorders											TRUE
797	Shock	symptoms											TRUE
264.1	Short stature	endocrine/metabolic											TRUE
527.2	Sialoadenitis	digestive											TRUE
528.7	Sialolithiasis	digestive											TRUE
427.8	Sinoatrial node dysfunction (Bradycardia)	circulatory system											TRUE
819	Skull and face fracture and other intercranial injury	injuries & poisonings											TRUE
327.72	Sleep related leg cramps	neurological											TRUE
327.7	Sleep related movement disorders	neurological											TRUE
586.11	Small kidney	genitourinary											TRUE
514.2	Solitary pulmonary nodule	respiratory											TRUE
303.4	Somatoform disorder	mental disorders											TRUE
291.4	Specific nonpsychotic mental disorders due to brain damage	mental disorders											TRUE
315.2	Speech and language disorder	mental disorders											TRUE
752.11	Spina bifida	congenital anomalies											TRUE
952	Spinal cord injury without evidence of spinal bone injury	injuries & poisonings											TRUE
715.3	Spinal enthesopathy	musculoskeletal											TRUE
334.1	Spinocerebellar disease	neurological											TRUE
130	Spirochetal infection	infectious diseases											TRUE
579.2	Splenomegaly	digestive											TRUE
754.2	Spondylolisthesis, congenital	congenital anomalies											TRUE
721	Spondylosis and allied disorders	musculoskeletal											TRUE
721.2	Spondylosis with myelopathy	musculoskeletal											TRUE
287.1	Spontaneous ecchymoses	hematopoietic											TRUE
172.22	Squamous cell carcinoma	neoplasms											TRUE
41.1	Staphylococcus infections	infectious diseases											TRUE
528.1	Stomatitis and mucositis	digestive											TRUE
528.11	Stomatitis and mucositis (ulcerative)	digestive											TRUE
378.1	Strabismus (not specified as paralytic)	sense organs											TRUE
378	Strabismus and other disorders of binocular eye movements	sense organs											TRUE
743.4	Stress fracture	musculoskeletal											TRUE
530.3	Stricture and stenosis of esophagus	digestive											TRUE
447.1	Stricture of artery	circulatory system											TRUE
586.4	Stricture/obstruction of ureter	genitourinary											TRUE
430.1	Subarachnoid hemorrhage	circulatory system											TRUE
430.3	Subdural hemorrhage	circulatory system											TRUE
1003	Sudden death	NULL											TRUE
297	Suicidal ideation or attempt	mental disorders											TRUE
297.2	Suicide or self-inflicted injury	mental disorders											TRUE
910	Superficial injury, infected	injuries & poisonings											TRUE
370.2	Superficial keratitis	sense organs											TRUE
427.61	Supraventricular premature beats	circulatory system											TRUE
292.12	Symbolic dysfunction	mental disorders											TRUE
726.2	Synoviopathy	musculoskeletal											TRUE
994.1	Systemic inflammatory response syndrome (SIRS)	injuries & poisonings											TRUE
709.3	Systemic sclerosis	dermatologic											TRUE
446.7	Takayasu's disease	circulatory system											TRUE
526.41	Temporomandibular joint disorder, unspecified	digestive											TRUE
526.4	Temporomandibular joint disorders	digestive											TRUE
257.1	Testicular hypofunction	endocrine/metabolic											TRUE
446.1	Thromboangiitis obliterans	circulatory system											TRUE
446.8	Thrombotic microangiopathy	circulatory system											TRUE
246.2	Thyroid cyst	endocrine/metabolic											TRUE
245.1	Thyroiditis, acute and subacute	endocrine/metabolic											TRUE
242.31	Thyrotoxic exophthalmos	endocrine/metabolic											TRUE
333.3	Tics and choreas	neurological											TRUE
313.2	Tics and stuttering	mental disorders											TRUE
521.4	Tooth complications likely association with other diseases	digestive											TRUE
333.4	Torsion dystonia	neurological											TRUE
723.1	Torticollis	musculoskeletal											TRUE
981	Toxic effect of (non-ethyl) alcohol and petroleum and other solvents	injuries & poisonings											TRUE
986	Toxic effect of carbon monoxide	injuries & poisonings											TRUE
983	Toxic effect of corrosive aromatics, acids, and caustic alkalis	injuries & poisonings											TRUE
984	Toxic effect of lead and its compounds (including fumes)	injuries & poisonings											TRUE
987	Toxic effect of other gases, fumes, or vapors	injuries & poisonings											TRUE
985	Toxic effect of other metals	injuries & poisonings											TRUE
989	Toxic effect of other substances, chiefly nonmedicinal as to source	injuries & poisonings											TRUE
913	Toxic effect of venom	injuries & poisonings											TRUE
695.1	Toxic erythema	dermatologic											TRUE
569.1	Toxic gastroenteritis and colitis	digestive											TRUE
362.5	Toxic maculopathy of retina	sense organs											TRUE
242.2	Toxic multinodular goiter	endocrine/metabolic											TRUE
519.1	Tracheostomy complications	respiratory											TRUE
292.5	Transient alteration of awareness	mental disorders											TRUE
433.31	Transient cerebral ischemia	circulatory system											TRUE
872	Traumatic amputation	injuries & poisonings											TRUE
958.2	Traumatic and surgical subcutaneous emphysema	injuries & poisonings											TRUE
836	Traumatic arthropathy	injuries & poisonings											TRUE
352.1	Trigeminal nerve disorders [CN5]	neurological											TRUE
10	Tuberculosis	infectious diseases											TRUE
385.5	Tympanosclerosis and middle ear disease related to otitis media	sense organs											TRUE
250.11	Type 1 diabetes with ketoacidosis	endocrine/metabolic											TRUE
250.14	Type 1 diabetes with neurological manifestations	endocrine/metabolic											TRUE
250.13	Type 1 diabetes with ophthalmic manifestations	endocrine/metabolic											TRUE
250.12	Type 1 diabetes with renal manifestations	endocrine/metabolic											TRUE
250.21	Type 2 diabetes with ketoacidosis	endocrine/metabolic											TRUE
250.24	Type 2 diabetes with neurological manifestations	endocrine/metabolic											TRUE
250.23	Type 2 diabetes with ophthalmic manifestations	endocrine/metabolic											TRUE
250.22	Type 2 diabetes with renal manifestations	endocrine/metabolic											TRUE
530.12	Ulcer of esophagus	digestive											TRUE
556.1	Ulceration of intestine	digestive											TRUE
556	Ulceration of the lower GI tract	digestive											TRUE
736.6	Unequal leg length (acquired)	musculoskeletal											TRUE
272.9	Unspecified disorder of lipoid metabolism	endocrine/metabolic											TRUE
695.9	Unspecified erythematous condition	dermatologic											TRUE
716.2	Unspecified monoarthritis	musculoskeletal											TRUE
710.19	Unspecified osteomyelitis	musculoskeletal											TRUE
716.1	Unspecified polyarthropathy or polyarthritis	musculoskeletal											TRUE
750.1	Upper gastrointestinal congenital anomalies	congenital anomalies											TRUE
597.8	Urethral hypermobility/ISD	genitourinary											TRUE
597.1	Urethral stricture (not specified as infectious)	genitourinary											TRUE
592.21	Urethral syndrome	genitourinary											TRUE
592.2	Urethritis and urethral syndrome	genitourinary											TRUE
594	Urinary calculus	genitourinary											TRUE
597.2	Urinary complications NEC	genitourinary											TRUE
599.1	Urinary obstruction	genitourinary											TRUE
618.2	Uterine/Uterovaginal prolapse	genitourinary											TRUE
747.12	Valvular heart disease/ heart chambers	congenital anomalies											TRUE
79.1	Varicella infection	infectious diseases											TRUE
454	Varicose veins	circulatory system											TRUE
856	Vascular complications of surgery and medical procedures	injuries & poisonings											TRUE
586.3	Vascular disorders of kidney/hypertrophy	genitourinary											TRUE
694.3	Vascular disorders of skin	dermatologic											TRUE
217	Vascular hamartomas and non-neoplastic nevi	neoplasms											TRUE
441	Vascular insufficiency of intestine	circulatory system											TRUE
90.3	Venereal diseases due to Chlamydia trachomatis	infectious diseases											TRUE
550.5	Ventral hernia	digestive											TRUE
427.41	Ventricular fibrillation and flutter	circulatory system											TRUE
386	Vertiginous syndromes and other disorders of vestibular system	sense organs											TRUE
586.12	Vesicoureteral reflux	genitourinary											TRUE
8.6	Viral Enteritis	infectious diseases											TRUE
70	Viral hepatitis	infectious diseases											TRUE
70.1	Viral hepatitis A	infectious diseases											TRUE
70.3	Viral hepatitis C	infectious diseases											TRUE
480.2	Viral pneumonia	respiratory											TRUE
368.4	Visual field defects	sense organs											TRUE
261.1	Vitamin A deficiency	endocrine/metabolic											TRUE
261.3	Vitamin C deficiencies	endocrine/metabolic											TRUE
261	Vitamin deficiency	endocrine/metabolic											TRUE
694.1	Vitiligo	dermatologic											TRUE
286.11	Von willebrand's disease	hematopoietic											TRUE
446.4	Wegener's granulomatosis	circulatory system											TRUE

## Sheet: UCSF <35 results
phecode	phenotype	category	rpl_count	control_count	rpl_prop	control_prop	odds_ratio_crude	p_value_crude	adj_p_value_crude	odds_ratio_w_age_re	p_value_w_age_re	adj_p_value_w_age_re	count_under10
785	Abdominal pain	symptoms	299	2019	0.213419	0.183345	1.20853	0.00658023	0.0974258	1.26902	0.000791625	0.0158987	FALSE
426.7	Abnormal electrocardiogram [ECG] [EKG]	circulatory system	36	252	0.0256959	0.0228841	1.12611	0.510473	0.988745	1.20756	0.302952	0.927714	FALSE
514	Abnormal findings examination of lungs	respiratory	14	175	0.00999286	0.0158918	0.625063	0.0920682	0.531833	0.690462	0.189639	0.757066	FALSE
396	Abnormal heart sounds	circulatory system	10	123	0.00713776	0.0111696	0.636439	0.17062	0.723681	0.667089	0.223833	0.817917	FALSE
350.1	Abnormal involuntary movements	neurological	10	65	0.00713776	0.00590265	1.21075	0.574777	0.988745	1.16797	0.651744	1	FALSE
792	Abnormal Papanicolaou smear of cervix and cervical HPV	genitourinary	22	218	0.0157031	0.0197966	0.789922	0.295622	0.925714	0.704069	0.121758	0.588998	FALSE
573.7	Abnormal results of function study of liver	digestive	11	31	0.00785153	0.00281511	2.80323	0.00341744	0.0566478	2.91266	0.00291355	0.0484835	FALSE
246.7	Abnormal results of function study of thyroid	endocrine/metabolic	13	67	0.00927909	0.00608427	1.53001	0.162387	0.705528	1.60621	0.123458	0.589721	FALSE
655.1	Abnormality in fetal heart rate or rhythm	pregnancy complications	150	3774	0.107066	0.342717	0.229959	1.15738e-61	2.94166e-59	0.21553	4.12083e-66	1.25685e-63	FALSE
654.1	Abnormality of organs and soft tissues of pelvis complicating pregnancy, childbirth, or the puerperium	pregnancy complications	115	1300	0.0820842	0.118053	0.66807	7.31801e-05	0.00186	0.597085	5.78007e-07	1.69512e-05	FALSE
626.11	Absent or infrequent menstruation	genitourinary	218	939	0.155603	0.0852706	1.97681	4.83463e-17	2.63315e-15	1.85554	7.97647e-14	3.37892e-12	FALSE
276.41	Acidosis	endocrine/metabolic	13	53	0.00927909	0.00481293	1.93664	0.0334569	0.303476	2.27938	0.00978925	0.121371	FALSE
706.1	Acne	dermatologic	59	389	0.0421128	0.0353251	1.2006	0.200098	0.791724	1.16316	0.295014	0.916286	FALSE
244.2	Acquired hypothyroidism	endocrine/metabolic	31	154	0.0221271	0.0139847	1.5954	0.0188654	0.21331	1.45437	0.0622861	0.437725	FALSE
592.11	Acute cystitis	genitourinary	22	92	0.0157031	0.00835452	1.89362	0.00756147	0.109821	1.91652	0.00729342	0.0975655	FALSE
338.1	Acute pain	neurological	52	359	0.0371163	0.0326008	1.14385	0.373959	0.988745	1.13209	0.41726	1	FALSE
465.2	Acute pharyngitis	respiratory	58	328	0.041399	0.0297857	1.40673	0.0188831	0.21331	1.49485	0.00652204	0.0947248	FALSE
285.1	Acute posthemorrhagic anemia	hematopoietic	20	298	0.0142755	0.0270614	0.520681	0.00504815	0.0793653	0.515335	0.00464885	0.0716111	FALSE
585.1	Acute renal failure	genitourinary	12	76	0.00856531	0.00690156	1.24315	0.485338	0.988745	1.3569	0.336851	0.967416	FALSE
464	Acute sinusitis	respiratory	15	72	0.0107066	0.00653832	1.64442	0.0812145	0.480876	1.58773	0.109979	0.566614	FALSE
465	Acute upper respiratory infections of multiple or unspecified sites	respiratory	56	467	0.0399714	0.0424083	0.940146	0.668951	0.988745	0.982526	0.903924	1	FALSE
304	Adjustment reaction	mental disorders	72	367	0.0513919	0.0333273	1.5714	0.000625145	0.0132409	1.53089	0.00148113	0.0275455	FALSE
300.12	Agorophobia, social phobia, and panic disorder	mental disorders	23	173	0.0164168	0.0157101	1.04574	0.841603	0.988745	1.08852	0.708262	1	FALSE
317.1	Alcoholism	mental disorders	11	42	0.00785153	0.00381402	2.06697	0.0326629	0.301884	1.99581	0.0460023	0.357926	FALSE
476	Allergic rhinitis	respiratory	47	353	0.0335475	0.0320559	1.04814	0.765904	0.988745	1.02708	0.867072	1	FALSE
949	Allergies, other	injuries & poisonings	23	123	0.0164168	0.0111696	1.47762	0.0881608	0.515116	1.4909	0.0858225	0.505326	FALSE
704.1	Alopecia	dermatologic	28	146	0.0199857	0.0132583	1.51776	0.045158	0.358677	1.45142	0.0771299	0.4963	FALSE
565	Anal and rectal conditions	digestive	17	135	0.0121342	0.0122594	0.989665	0.967995	0.989681	0.949962	0.844135	1	FALSE
644	Anemia during pregnancy	pregnancy complications	110	2110	0.0785153	0.191609	0.359477	1.40579e-23	1.07191e-21	0.352939	8.13285e-24	6.52768e-22	FALSE
635.2	Antepartum hemorrhage, abruptio placentae, and placenta previa	pregnancy complications	185	1217	0.132049	0.110516	1.22448	0.016631	0.192138	1.15549	0.0908874	0.525012	FALSE
300.1	Anxiety disorder	mental disorders	152	1254	0.108494	0.113876	0.946988	0.549418	0.988745	0.896545	0.236404	0.834069	FALSE
427.5	Arrhythmia (cardiac) NOS	circulatory system	18	137	0.012848	0.012441	1.03314	0.897193	0.988745	1.03179	0.902238	1	FALSE
495	Asthma	respiratory	92	1055	0.0656674	0.0958046	0.663322	0.000267217	0.00617433	0.66664	0.000373403	0.00837412	FALSE
495.2	Asthma with exacerbation	respiratory	18	127	0.012848	0.0115329	1.11551	0.666261	0.988745	1.18006	0.51801	1	FALSE
367.2	Astigmatism	sense organs	17	93	0.0121342	0.00844533	1.44216	0.167575	0.723681	1.40727	0.203062	0.781993	FALSE
939	Atopic/contact dermatitis due to other or unspecified	dermatologic	79	623	0.0563883	0.0565746	0.996509	0.977309	0.989681	0.998508	0.990428	1	FALSE
313.1	Attention deficit hyperactivity disorder	mental disorders	15	86	0.0107066	0.00780966	1.37496	0.257576	0.859354	1.29637	0.362378	1	FALSE
760	Back pain	symptoms	131	1024	0.0935046	0.0929895	1.00611	0.950147	0.988745	1.03437	0.732854	1	FALSE
41	Bacterial infection NOS	infectious diseases	43	261	0.0306924	0.0237014	1.3043	0.111829	0.599088	1.36853	0.0669017	0.45324	FALSE
610.4	Benign neoplasm of breast	genitourinary	13	53	0.00927909	0.00481293	1.93664	0.0334569	0.303476	1.82892	0.0550908	0.398168	FALSE
216	Benign neoplasm of skin	neoplasms	119	782	0.0849393	0.0710134	1.21431	0.0588186	0.416649	1.04516	0.675837	1	FALSE
296.1	Bipolar	mental disorders	16	85	0.0114204	0.00771885	1.48509	0.148932	0.671955	1.51168	0.137923	0.625992	FALSE
578.2	Blood in stool	digestive	20	87	0.0142755	0.00790047	1.81861	0.0165784	0.192138	2.11457	0.00331743	0.0532534	FALSE
594.1	Calculus of kidney	genitourinary	10	68	0.00713776	0.00617508	1.15702	0.667839	0.988745	1.25482	0.510332	1	FALSE
112	Candidiasis	infectious diseases	52	541	0.0371163	0.0491282	0.746075	0.0477887	0.377605	0.784199	0.105054	0.561523	FALSE
686.1	Carbuncle and furuncle	dermatologic	11	150	0.00785153	0.0136215	0.573055	0.07589	0.472376	0.588084	0.0923308	0.527024	FALSE
747	Cardiac and circulatory congenital anomalies	congenital anomalies	11	72	0.00785153	0.00653832	1.20244	0.570525	0.988745	1.24932	0.496348	1	FALSE
747.1	Cardiac congenital anomalies	congenital anomalies	10	110	0.00713776	0.0099891	0.712503	0.306346	0.944538	0.784519	0.46834	1	FALSE
636.8	Cervical incompetence	pregnancy complications	66	154	0.0471092	0.0139847	3.48571	8.28771e-17	4.35819e-15	3.7171	1.96962e-17	1.15526e-15	FALSE
180.3	Cervical intraepithelial neoplasia [CIN] [Cervical dysplasia]	neoplasms	32	214	0.0228408	0.0194333	1.17944	0.389257	0.988745	1.08546	0.671051	1	FALSE
761	Cervicalgia	symptoms	35	216	0.0249822	0.019615	1.28064	0.179926	0.749691	1.23072	0.266837	0.869499	FALSE
614.51	Cervicitis and endocervicitis	genitourinary	16	138	0.0114204	0.0125318	0.910291	0.723447	0.988745	0.861789	0.578013	1	FALSE
574.1	Cholelithiasis	digestive	12	93	0.00856531	0.00844533	1.01433	0.963162	0.989106	1.27333	0.440522	1	FALSE
758.1	Chromosomal anomalies	congenital anomalies	31	38	0.0221271	0.00345078	6.53465	1.33695e-14	5.99662e-13	6.41472	6.77757e-14	2.95308e-12	FALSE
245.21	Chronic lymphocytic thyroiditis	endocrine/metabolic	28	120	0.0199857	0.0108972	1.85103	0.0036501	0.0598538	1.72485	0.0110654	0.131834	FALSE
338.2	Chronic pain	neurological	61	286	0.0435403	0.0259717	1.70725	0.000203158	0.00491771	1.65931	0.000546328	0.0119021	FALSE
472	Chronic pharyngitis and nasopharyngitis	respiratory	15	71	0.0107066	0.00644751	1.66773	0.0733122	0.464005	1.51673	0.148534	0.658471	FALSE
474.2	Chronic tonsillitis and adenoiditis	respiratory	14	41	0.00999286	0.00372321	2.70093	0.00139183	0.0265318	3.13736	0.000349212	0.00794848	FALSE
286.3	Coagulation defects complicating pregnancy or postpartum	hematopoietic	69	729	0.0492505	0.0662005	0.730697	0.0151935	0.182776	0.703	0.0068311	0.0970342	FALSE
669	Complications of labor and delivery NEC	pregnancy complications	100	1933	0.0713776	0.175536	0.361018	1.3698e-21	9.08236e-20	0.343326	2.43936e-23	1.86002e-21	FALSE
1011	Complications of surgical and medical procedures	NULL	37	184	0.0264097	0.016709	1.59631	0.0103638	0.136253	1.65533	0.00660219	0.0949843	FALSE
851	Complications of transplants and reattached limbs	injuries & poisonings	14	45	0.00999286	0.00408645	2.45995	0.00340338	0.0566478	2.55539	0.00304901	0.0494654	FALSE
751.11	Congenital anomalies of female genital organs	congenital anomalies	107	123	0.076374	0.0111696	7.32036	6.5277e-49	1.24434e-46	6.67712	7.51153e-43	1.27279e-40	FALSE
369.5	Conjunctivitis, infectious	sense organs	17	89	0.0121342	0.00808209	1.50753	0.123113	0.623744	1.51643	0.123285	0.589721	FALSE
563	Constipation	digestive	81	673	0.0578158	0.0611151	0.942702	0.626319	0.988745	1.00713	0.953892	1	FALSE
916	Contusion	injuries & poisonings	31	108	0.0221271	0.00980748	2.28456	5.94066e-05	0.00153551	2.31274	6.75134e-05	0.00168783	FALSE
345.3	Convulsions	neurological	10	63	0.00713776	0.00572103	1.24942	0.514478	0.988745	1.31066	0.43518	1	FALSE
512.8	Cough	respiratory	74	469	0.0528194	0.0425899	1.25358	0.0784499	0.474933	1.29544	0.0470548	0.360596	FALSE
610.1	Cystic mastopathy	genitourinary	11	62	0.00785153	0.00563022	1.39766	0.307981	0.944538	1.26504	0.476946	1	FALSE
722.6	Degeneration of intervertebral disc	musculoskeletal	10	43	0.00713776	0.00390483	1.83388	0.0851233	0.499281	1.61691	0.177908	0.739263	FALSE
296.2	Depression	mental disorders	31	359	0.0221271	0.0326008	0.671458	0.035349	0.30725	0.673972	0.0390027	0.323256	FALSE
110.2	Dermatomycoses	infectious diseases	13	69	0.00927909	0.00626589	1.48539	0.192608	0.769943	1.41333	0.260909	0.86486	FALSE
649.1	Diabetes or abnormal glucose tolerance complicating pregnancy	pregnancy complications	129	1911	0.0920771	0.173538	0.482982	2.9727e-14	1.29525e-12	0.462388	1.75902e-15	8.65322e-14	FALSE
561.1	Diarrhea	digestive	42	330	0.0299786	0.0299673	1.00039	0.998139	0.998139	1.07807	0.655374	1	FALSE
704	Diseases of hair and hair follicles	dermatologic	13	74	0.00927909	0.00671994	1.3844	0.281584	0.905939	1.30499	0.384229	1	FALSE
689	Disorder of skin and subcutaneous tissue NOS	dermatologic	27	176	0.0192719	0.0159826	1.20986	0.361257	0.988745	1.08987	0.684021	1	FALSE
626	Disorders of menstruation and other abnormal bleeding from female genital tract	genitourinary	121	305	0.0863669	0.0276971	3.31851	5.07514e-27	5.15973e-25	3.33309	3.94132e-26	4.00701e-24	FALSE
619.2	Disorders of uterus, NEC	genitourinary	110	328	0.0785153	0.0297857	2.77541	3.54526e-19	2.16261e-17	2.68239	1.66032e-17	1.0128e-15	FALSE
617	Disorders secondary to childbirth, surgery, trauma	genitourinary	145	705	0.103498	0.0640211	1.6878	4.90571e-08	1.59175e-06	1.66134	1.80572e-07	5.73692e-06	FALSE
722.1	Displacement of intervertebral disc	musculoskeletal	10	48	0.00713776	0.00435888	1.6421	0.155008	0.683202	1.52627	0.230953	0.828714	FALSE
687.4	Disturbance of skin sensation	dermatologic	35	287	0.0249822	0.0260625	0.957487	0.81065	0.988745	0.922398	0.659044	1	FALSE
270.11	Disturbances of sulphur-bearing amino-acid metabolism	endocrine/metabolic	12	11	0.00856531	0.00099891	8.64009	2.54947e-07	7.6234e-06	8.75466	3.05204e-07	9.49869e-06	FALSE
386.9	Dizziness and giddiness (Light-headedness and vertigo)	sense organs	66	403	0.0471092	0.0365964	1.30146	0.0525669	0.385518	1.39618	0.0153233	0.168115	FALSE
626.2	Dysmenorrhea	genitourinary	40	131	0.028551	0.0118961	2.44118	1.06601e-06	3.06729e-05	2.55857	4.83743e-07	1.44649e-05	FALSE
277.7	Dysmetabolic syndrome X	endocrine/metabolic	26	21	0.0185582	0.00190701	9.89666	7.49722e-15	3.46463e-13	11.396	8.72607e-16	4.58871e-14	FALSE
625.1	Dyspareunia	genitourinary	29	290	0.0206995	0.0263349	0.781487	0.210311	0.819303	0.722729	0.101135	0.557187	FALSE
599.3	Dysuria	genitourinary	86	634	0.0613847	0.0575736	1.07053	0.565491	0.988745	1.09781	0.436338	1	FALSE
636.2	Early onset of delivery	pregnancy complications	43	235	0.0306924	0.0213404	1.45211	0.026707	0.262763	1.5373	0.0121868	0.140795	FALSE
636	Early or threatened labor; hemorrhage in early pregnancy	pregnancy complications	225	1203	0.1606	0.109244	1.56003	1.74928e-08	5.79924e-07	1.54011	6.60996e-08	2.14472e-06	FALSE
782.3	Edema	symptoms	22	177	0.0157031	0.0160734	0.976594	0.917214	0.988745	0.962432	0.868012	1	FALSE
1015	Effects of other external causes	NULL	10	60	0.00713776	0.0054486	1.31225	0.42788	0.988745	1.30525	0.443364	1	FALSE
288.2	Elevated white blood cell count	hematopoietic	10	102	0.00713776	0.00926262	0.768949	0.429442	0.988745	0.80831	0.527367	1	FALSE
615	Endometriosis	genitourinary	66	106	0.0471092	0.00962586	5.08654	1.96395e-24	1.6639e-22	4.90442	1.0015e-22	7.2728e-21	FALSE
726.1	Enthesopathy	musculoskeletal	18	78	0.012848	0.00708318	1.82446	0.0222602	0.240757	1.72989	0.0394404	0.325117	FALSE
345	Epilepsy, recurrent seizures, convulsions	neurological	14	81	0.00999286	0.00735561	1.36215	0.287927	0.924396	1.36369	0.292226	0.914891	FALSE
477	Epistaxis or throat hemorrhage	respiratory	14	66	0.00999286	0.00599346	1.67403	0.0813547	0.480876	1.74006	0.0649375	0.444408	FALSE
401.1	Essential hypertension	circulatory system	65	431	0.0463954	0.0391391	1.19442	0.192065	0.769943	1.11951	0.415754	1	FALSE
626.12	Excessive or frequent menstruation	genitourinary	51	151	0.0364026	0.0137123	2.71725	1.22913e-09	4.46292e-08	2.59946	1.17999e-08	3.99885e-07	FALSE
643	Excessive vomiting in pregnancy	pregnancy complications	59	504	0.0421128	0.0457683	0.916619	0.535803	0.988745	0.993519	0.963651	1	FALSE
661	Fetal distress and abnormal forces of labor	pregnancy complications	77	1809	0.0549607	0.164275	0.295865	3.32576e-24	2.66936e-22	0.2799	4.6986e-26	4.47835e-24	FALSE
783	Fever of unknown origin	symptoms	47	280	0.0335475	0.0254268	1.33046	0.0747887	0.469353	1.45301	0.0218135	0.20791	FALSE
561.2	Flatulence	digestive	17	105	0.0121342	0.00953505	1.27594	0.354139	0.988745	1.30039	0.323478	0.946733	FALSE
1001	Foreign body injury	NULL	10	36	0.00713776	0.00326916	2.19187	0.0286378	0.272062	2.26607	0.0244417	0.231513	FALSE
801	Fracture of ankle and foot	injuries & poisonings	10	36	0.00713776	0.00326916	2.19187	0.0286378	0.272062	2.15656	0.0347067	0.300726	FALSE
599.5	Frequency of urination and polyuria	genitourinary	49	272	0.034975	0.0247003	1.43105	0.0231755	0.245435	1.40868	0.0318672	0.284195	FALSE
535.9	Gastritis and duodenitis, NOS	digestive	14	55	0.00999286	0.00499455	2.01085	0.0201746	0.22134	2.35803	0.0051427	0.0777763	FALSE
300.11	Generalized anxiety disorder	mental disorders	21	246	0.0149893	0.0223393	0.665978	0.0758663	0.472376	0.618896	0.0375877	0.314152	FALSE
530.11	GERD	digestive	73	848	0.0521056	0.0770069	0.658861	0.000878292	0.0180999	0.651548	0.000700625	0.0146364	FALSE
389	Hearing loss	sense organs	10	78	0.00713776	0.00708318	1.00776	0.981703	0.989681	1.05512	0.874504	1	FALSE
530.9	Heartburn	digestive	13	163	0.00927909	0.014802	0.623386	0.102381	0.571911	0.622109	0.103348	0.561421	FALSE
228.1	Hemangioma of skin and subcutaneous tissue	neoplasms	16	79	0.0114204	0.00717399	1.59876	0.0886841	0.516195	1.32073	0.317794	0.944709	FALSE
593	Hematuria	genitourinary	18	116	0.012848	0.010534	1.22253	0.430617	0.988745	1.313	0.293365	0.914891	FALSE
636.3	Hemorrhage in early pregnancy	pregnancy complications	293	431	0.209136	0.0391391	6.49198	4.45007e-115	1.69659e-112	6.48928	4.20687e-110	1.60387e-107	FALSE
459.1	Hemorrhage NOS	circulatory system	18	22	0.012848	0.00199782	6.50168	4.44534e-09	1.50648e-07	6.61287	6.27552e-09	2.17504e-07	FALSE
578.8	Hemorrhage of rectum and anus	digestive	15	103	0.0107066	0.00935343	1.14624	0.623238	0.988745	1.20431	0.508799	1	FALSE
455	Hemorrhoids	circulatory system	35	386	0.0249822	0.0350527	0.705342	0.0508745	0.385518	0.668311	0.0252475	0.234771	FALSE
54	Herpes simplex	infectious diseases	36	501	0.0256959	0.0454958	0.55332	0.000716644	0.014971	0.511114	0.000142288	0.00339046	FALSE
595	Hydronephrosis	genitourinary	10	122	0.00713776	0.0110788	0.641714	0.178717	0.746695	0.672266	0.233294	0.830804	FALSE
643.1	Hyperemesis gravidarum	pregnancy complications	37	208	0.0264097	0.0188885	1.40899	0.0577948	0.415741	1.59194	0.0115578	0.135582	FALSE
705.8	Hyperhidrosis	dermatologic	11	44	0.00785153	0.00399564	1.97266	0.044619	0.356251	1.96849	0.0481512	0.367153	FALSE
272.1	Hyperlipidemia	endocrine/metabolic	16	93	0.0114204	0.00844533	1.35634	0.262739	0.859354	1.40946	0.213481	0.798885	FALSE
642	Hypertension complicating pregnancy, childbirth, and the puerperium	pregnancy complications	116	2163	0.082798	0.196422	0.369311	1.97251e-23	1.43242e-21	0.346411	8.18262e-26	7.34029e-24	FALSE
623	Hypertrophy of female genital organs	genitourinary	14	140	0.00999286	0.0127134	0.78385	0.38729	0.988745	0.735051	0.277801	0.887046	FALSE
276.14	Hypopotassemia	endocrine/metabolic	13	82	0.00927909	0.00744642	1.24842	0.459373	0.988745	1.40952	0.261443	0.86486	FALSE
244.4	Hypothyroidism NOS	endocrine/metabolic	111	650	0.0792291	0.0590265	1.37171	0.00309942	0.0537116	1.25843	0.0337821	0.294387	FALSE
276.5	Hypovolemia	endocrine/metabolic	14	111	0.00999286	0.0100799	0.991277	0.975479	0.989681	1.08584	0.775638	1	FALSE
250.41	Impaired fasting glucose	endocrine/metabolic	26	258	0.0185582	0.023429	0.788172	0.251778	0.859354	0.758864	0.188162	0.757066	FALSE
647.1	Infections of genitourinary tract during pregnancy	pregnancy complications	69	806	0.0492505	0.0731929	0.655942	0.00105791	0.0209522	0.717149	0.0107609	0.129216	FALSE
647	Infectious and parasitic complications affecting pregnancy	pregnancy complications	62	1278	0.0442541	0.116055	0.352673	5.24061e-15	2.49748e-13	0.35679	1.46162e-14	6.75446e-13	FALSE
626.8	Infertility, female	genitourinary	354	414	0.252677	0.0375954	8.65526	4.63008e-163	3.53043e-160	7.73084	7.09795e-136	3.60812e-133	FALSE
626.15	Infertility, female, associated with anovulation	genitourinary	61	120	0.0435403	0.0108972	4.13192	7.10515e-19	4.16745e-17	3.68051	1.10616e-15	5.62297e-14	FALSE
371.3	Inflammation of eyelids	sense organs	12	69	0.00856531	0.00626589	1.37014	0.316002	0.9505	1.3335	0.364187	1	FALSE
614.4	Inflammatory diseases of uterus, except cervix	genitourinary	11	57	0.00785153	0.00517617	1.52095	0.204584	0.806177	1.70476	0.112671	0.569485	FALSE
1009	Injury, NOS	NULL	49	282	0.034975	0.0256084	1.37902	0.0412264	0.338013	1.41275	0.0312719	0.280527	FALSE
327.4	Insomnia	neurological	36	216	0.0256959	0.019615	1.31819	0.129661	0.652584	1.23435	0.253182	0.854989	FALSE
271.3	Intestinal disaccharidase deficiencies and disaccharide malabsorption	endocrine/metabolic	17	113	0.0121342	0.0102615	1.18473	0.517141	0.988745	1.20914	0.473668	1	FALSE
280.1	Iron deficiency anemias, unspecified or not due to blood loss	hematopoietic	33	422	0.0235546	0.0383218	0.605357	0.00609814	0.0921943	0.617247	0.00902366	0.114046	FALSE
626.14	Irregular menstrual bleeding	genitourinary	33	89	0.0235546	0.00808209	2.9606	1.33825e-07	4.08166e-06	2.87542	4.61414e-07	1.40731e-05	FALSE
626.13	Irregular menstrual cycle	genitourinary	152	527	0.108494	0.0478569	2.42125	6.59586e-20	4.19112e-18	2.46265	4.96101e-20	3.15231e-18	FALSE
626.1	Irregular menstrual cycle/bleeding	genitourinary	25	81	0.0178444	0.00735561	2.45186	0.000100386	0.00246918	2.60986	4.41995e-05	0.0011234	FALSE
564.1	Irritable Bowel Syndrome	digestive	17	82	0.0121342	0.00744642	1.63727	0.0658352	0.450218	1.49667	0.135973	0.623161	FALSE
741.4	Joint effusions	musculoskeletal	12	79	0.00856531	0.00717399	1.19561	0.565813	0.988745	1.08849	0.787581	1	FALSE
840.3	Joint/ligament sprain	injuries & poisonings	18	90	0.012848	0.0081729	1.57946	0.0784808	0.474933	1.5047	0.121302	0.588998	FALSE
655	Known or suspected fetal abnormality affecting management of mother	pregnancy complications	597	6015	0.426124	0.546222	0.616868	3.49722e-17	1.97528e-15	0.61529	5.10091e-17	2.88107e-15	FALSE
737.3	Kyphoscoliosis and scoliosis	musculoskeletal	12	106	0.00856531	0.00962586	0.888871	0.700147	0.988745	0.837164	0.564588	1	FALSE
645	Late pregnancy and failed induction	pregnancy complications	88	2575	0.0628123	0.233836	0.219598	1.83945e-41	3.11684e-39	0.201686	1.81405e-45	3.45802e-43	FALSE
687.2	Localized superficial swelling, mass, or lump	dermatologic	17	128	0.0121342	0.0116237	1.04446	0.866983	0.988745	0.996579	0.989574	1	FALSE
611.3	Lump or mass in breast	genitourinary	47	352	0.0335475	0.0319651	1.05122	0.751818	0.988745	0.939981	0.698087	1	FALSE
289.4	Lymphadenitis	hematopoietic	19	130	0.0135617	0.0118053	1.15083	0.569932	0.988745	1.11102	0.673177	1	FALSE
296.22	Major depressive disorder	mental disorders	79	768	0.0563883	0.0697421	0.797084	0.0623736	0.429458	0.780608	0.0441012	0.354674	FALSE
798	Malaise and fatigue	symptoms	77	444	0.0549607	0.0403197	1.38424	0.0103641	0.136253	1.34304	0.0216499	0.207648	FALSE
652	Malposition and malpresentation of fetus or obstruction	pregnancy complications	103	1562	0.0735189	0.141845	0.48008	4.3274e-12	1.69213e-10	0.468853	1.18832e-12	4.76892e-11	FALSE
613.5	Mastodynia	genitourinary	26	227	0.0185582	0.0206139	0.89839	0.608175	0.988745	0.866581	0.496783	1	FALSE
658	Maternal complication of pregnancy affecting fetus or newborn	pregnancy complications	10	126	0.00713776	0.0114421	0.621115	0.14829	0.67122	0.592388	0.114338	0.569554	FALSE
857	Mechanical complication of unspecified genitourinary device, implant, and graft	injuries & poisonings	13	104	0.00927909	0.00944424	0.982349	0.95195	0.988745	0.958012	0.885435	1	FALSE
306.1	Mental disorders durring/after pregnancy	mental disorders	143	1962	0.10207	0.178169	0.52433	1.90783e-12	7.65641e-11	0.499149	6.64252e-14	2.95308e-12	FALSE
340.1	Migrain with aura	neurological	15	156	0.0107066	0.0141664	0.753136	0.296828	0.927295	0.718329	0.227042	0.824378	FALSE
340	Migraine	neurological	64	513	0.0456817	0.0465855	0.979668	0.87969	0.988745	0.943703	0.673098	1	FALSE
262	Mineral deficiency NEC	endocrine/metabolic	13	60	0.00927909	0.0054486	1.70961	0.0809198	0.480876	1.54973	0.158712	0.687208	FALSE
296	Mood disorders	mental disorders	11	79	0.00785153	0.00717399	1.09519	0.778365	0.988745	1.14272	0.683179	1	FALSE
278.11	Morbid obesity	endocrine/metabolic	27	174	0.0192719	0.0158009	1.22399	0.333092	0.986341	1.3243	0.18875	0.757066	FALSE
622.2	Mucous polyp of cervix	genitourinary	10	69	0.00713776	0.00626589	1.14015	0.699312	0.988745	1.04157	0.905116	1	FALSE
651	Multiple gestation	pregnancy complications	67	268	0.047823	0.0243371	2.01349	5.38775e-07	1.58006e-05	1.88499	7.55981e-06	0.000202258	FALSE
771	Musculoskeletal symptoms referable to limbs	symptoms	11	58	0.00785153	0.00526698	1.49459	0.223454	0.849793	1.38953	0.323282	0.946733	FALSE
770	Myalgia and myositis unspecified	symptoms	14	94	0.00999286	0.00853614	1.17238	0.580667	0.988745	1.16899	0.591957	1	FALSE
367.1	Myopia	sense organs	31	169	0.0221271	0.0153469	1.45179	0.0590531	0.416649	1.42615	0.0760377	0.495545	FALSE
789	Nausea and vomiting	symptoms	108	630	0.0770878	0.0572103	1.37647	0.0031581	0.0541135	1.50716	0.000212539	0.00491421	FALSE
173	Neoplasm of uncertain behavior of skin	neoplasms	36	249	0.0256959	0.0226117	1.14	0.468162	0.988745	0.986148	0.93919	1	FALSE
558	Noninfectious gastroenteritis	digestive	28	160	0.0199857	0.0145296	1.38318	0.116825	0.60703	1.47723	0.0636895	0.442617	FALSE
619.3	Noninflammatory disorders of cervix	genitourinary	58	339	0.041399	0.0307846	1.35969	0.0341101	0.305987	1.24626	0.133228	0.619428	FALSE
619.1	Noninflammatory disorders of ovary, fallopian tube, and broad ligament	genitourinary	37	153	0.0264097	0.0138939	1.92524	0.000411782	0.00910097	1.7522	0.00294548	0.0484835	FALSE
619.4	Noninflammatory disorders of vagina	genitourinary	128	899	0.0913633	0.0816382	1.1311	0.213554	0.824051	1.11656	0.27073	0.880304	FALSE
619.5	Noninflammatory disorders of vulva and perineum	genitourinary	22	240	0.0157031	0.0217944	0.716051	0.136811	0.668542	0.683932	0.0929429	0.527024	FALSE
619	Noninflammatory female genital disorders	genitourinary	24	175	0.0171306	0.0158918	1.07932	0.728093	0.988745	1.06156	0.787232	1	FALSE
395.1	Nonrheumatic mitral valve disorders	circulatory system	11	53	0.00785153	0.00481293	1.63634	0.13864	0.668542	1.62477	0.149437	0.659024	FALSE
793.2	Nonspecific abnormal findings on radiological and other examination of other intrathoracic organs (echocardiogram, etc)	symptoms	16	39	0.0114204	0.00354159	3.25036	7.74202e-05	0.00193551	3.27657	8.79616e-05	0.00216357	FALSE
418	Nonspecific chest pain	circulatory system	75	608	0.0535332	0.0552125	0.967864	0.795149	0.988745	1.04795	0.714326	1	FALSE
650	Normal delivery	pregnancy complications	206	6235	0.147038	0.566201	0.132074	4.56291e-149	2.31948e-146	0.127715	3.53106e-151	2.69243e-148	FALSE
278.1	Obesity	endocrine/metabolic	75	676	0.0535332	0.0613876	0.864816	0.245815	0.859354	0.91817	0.508458	1	FALSE
665	Obstetrical/birth trauma	pregnancy complications	189	6429	0.134904	0.583818	0.111164	9.97957e-164	1.52188e-160	0.0970275	9.00161e-178	1.37275e-174	FALSE
575.2	Obstruction of bile duct	digestive	16	156	0.0114204	0.0141664	0.803925	0.408424	0.988745	0.816493	0.445939	1	FALSE
871.2	Open wound of finger(s)	injuries & poisonings	14	63	0.00999286	0.00572103	1.75423	0.0583087	0.416649	1.74289	0.064125	0.442617	FALSE
382	Otalgia	sense organs	18	82	0.012848	0.00744642	1.73483	0.035386	0.30725	1.76284	0.0332004	0.292326	FALSE
790.6	Other abnormal blood chemistry	symptoms	45	212	0.0321199	0.0192517	1.6906	0.00162721	0.0306358	1.67315	0.00232074	0.0406796	FALSE
250.42	Other abnormal glucose	endocrine/metabolic	23	271	0.0164168	0.0246095	0.661538	0.0591039	0.416649	0.629283	0.0360829	0.30741	FALSE
599.9	Other abnormality of urination	genitourinary	20	145	0.0142755	0.0131675	1.08537	0.733098	0.988745	1.07756	0.758125	1	FALSE
286.7	Other and unspecified coagulation defects	hematopoietic	11	45	0.00785153	0.00408645	1.92865	0.0516753	0.385518	2.04036	0.0376983	0.314152	FALSE
654	Other and unspecified complications of birth; puerperium affecting management of mother	pregnancy complications	29	221	0.0206995	0.020069	1.03208	0.874283	0.988745	0.82486	0.342871	0.975519	FALSE
759	Other and unspecified congenital anomalies	congenital anomalies	12	117	0.00856531	0.0106248	0.80449	0.474814	0.988745	1.05185	0.869846	1	FALSE
285	Other anemias	hematopoietic	101	1520	0.0720914	0.138031	0.485168	1.34167e-11	5.11511e-10	0.483879	1.94696e-11	7.61311e-10	FALSE
215	Other benign neoplasm of connective and other soft tissue	neoplasms	11	55	0.00785153	0.00499455	1.57655	0.169689	0.723681	1.25954	0.491675	1	FALSE
571.5	Other chronic nonalcoholic liver disease	digestive	22	85	0.0157031	0.00771885	2.05088	0.00286812	0.0502745	2.19898	0.00136833	0.0257617	FALSE
646	Other complications of pregnancy NEC	pregnancy complications	427	5028	0.304782	0.456593	0.521753	1.83055e-26	1.74474e-24	0.516623	1.50262e-26	1.63678e-24	FALSE
674	Other complications of the puerperium NEC	pregnancy complications	35	739	0.0249822	0.0671086	0.356181	3.92758e-09	1.36126e-07	0.34896	2.31749e-09	8.41469e-08	FALSE
649	Other conditions or status of the mother complicating pregnancy, childbirth, or the puerperium	pregnancy complications	473	6308	0.337616	0.57283	0.380092	4.56008e-59	9.93447e-57	0.379407	8.89567e-58	1.93798e-55	FALSE
742.9	Other derangement of joint	musculoskeletal	23	137	0.0164168	0.012441	1.32491	0.215487	0.825672	1.27198	0.294098	0.915304	FALSE
525	Other diseases of the teeth and supporting structures	digestive	12	47	0.00856531	0.00426807	2.01553	0.0308773	0.290666	2.32716	0.0112899	0.133466	FALSE
569	Other disorders of intestine	digestive	10	58	0.00713776	0.00526698	1.35774	0.373416	0.988745	1.31698	0.429329	1	FALSE
573	Other disorders of liver	digestive	13	68	0.00927909	0.00617508	1.50737	0.177107	0.741999	1.60872	0.121747	0.588998	FALSE
729	Other disorders of soft tissues	musculoskeletal	21	144	0.0149893	0.0130766	1.14849	0.556319	0.988745	1.15229	0.552454	1	FALSE
537	Other disorders of stomach and duodenum	digestive	12	26	0.00856531	0.00236106	3.65044	0.000217331	0.00517859	3.76755	0.00021268	0.00491421	FALSE
676	Other disorders of the breast associated with childbirth and disorders of lactation	pregnancy complications	22	429	0.0157031	0.0389575	0.393559	2.33639e-05	0.000625087	0.377502	1.07892e-05	0.000283682	FALSE
586	Other disorders of the kidney and ureters	genitourinary	13	117	0.00927909	0.0106248	0.872158	0.641426	0.988745	0.920686	0.780369	1	FALSE
246	Other disorders of thyroid	endocrine/metabolic	20	159	0.0142755	0.0144388	0.988528	0.961489	0.988745	0.921118	0.732738	1	FALSE
694.2	Other dyschromia	dermatologic	52	394	0.0371163	0.0357792	1.03881	0.80005	0.988745	0.916916	0.569422	1	FALSE
512.9	Other dyspnea	respiratory	32	188	0.0228408	0.0170723	1.34579	0.124585	0.629115	1.40408	0.0846907	0.503938	FALSE
259	Other endocrine disorders	endocrine/metabolic	10	45	0.00713776	0.00408645	1.75206	0.109868	0.599088	1.80627	0.0948015	0.533591	FALSE
339	Other headache syndromes	neurological	70	727	0.0499643	0.0660189	0.744029	0.0213494	0.232556	0.802682	0.0918159	0.526388	FALSE
282.8	Other hemoglobinopathies	hematopoietic	18	208	0.012848	0.0188885	0.676039	0.113252	0.599088	0.669666	0.109797	0.566614	FALSE
638	Other high-risk pregnancy	pregnancy complications	676	3751	0.482512	0.340628	1.80492	4.75224e-25	4.26303e-23	1.75561	4.00234e-22	2.77435e-20	FALSE
701	Other hypertrophic and atrophic conditions of skin	dermatologic	25	158	0.0178444	0.014348	1.24811	0.307389	0.944538	1.21804	0.36954	1	FALSE
1019	Other ill-defined and unknown causes of morbidity and mortality	NULL	24	118	0.0171306	0.0107156	1.6091	0.0351034	0.30725	1.73188	0.0165321	0.17508	FALSE
279.7	Other immunological findings	endocrine/metabolic	11	31	0.00785153	0.00281511	2.80323	0.00341744	0.0566478	2.65958	0.00591862	0.0867875	FALSE
598.9	Other nonspecific findings on examination of urine	genitourinary	38	286	0.0271235	0.0259717	1.04559	0.798979	0.988745	1.14965	0.431918	1	FALSE
656	Other perinatal conditions of fetus or newborn	pregnancy complications	310	2357	0.221271	0.214039	1.04338	0.534815	0.988745	1.06555	0.359071	1	FALSE
351	Other peripheral nerve disorders	neurological	22	237	0.0157031	0.021522	0.725316	0.152801	0.678084	0.667925	0.0748125	0.490189	FALSE
613.7	Other signs and symptoms in breast	genitourinary	16	74	0.0114204	0.00671994	1.70756	0.0535553	0.388913	1.48179	0.160623	0.690001	FALSE
704.8	Other specified diseases of hair and hair follicles	dermatologic	10	63	0.00713776	0.00572103	1.24942	0.514478	0.988745	1.21566	0.572698	1	FALSE
279.8	Other specified disorders involving the immune mechanism	endocrine/metabolic	16	15	0.0114204	0.00136215	8.46941	3.10513e-09	1.10124e-07	8.46166	5.10532e-09	1.81061e-07	FALSE
613.8	Other specified disorders of breast	genitourinary	10	55	0.00713776	0.00499455	1.43219	0.297724	0.927295	1.18917	0.619378	1	FALSE
1005	Other symptoms	NULL	26	117	0.0185582	0.0106248	1.76081	0.00968047	0.134206	1.88857	0.00418719	0.0658296	FALSE
579	Other symptoms involving abdomen and pelvis	digestive	18	103	0.012848	0.00935343	1.37847	0.211793	0.819758	1.35479	0.243115	0.834069	FALSE
599.8	Other symptoms involving urinary system	genitourinary	40	232	0.028551	0.0210679	1.36563	0.0726551	0.463594	1.2999	0.134786	0.620995	FALSE
599	Other symptoms/disorders or the urinary system	genitourinary	14	40	0.00999286	0.0036324	2.76871	0.00109163	0.0213428	2.84872	0.00101261	0.0197978	FALSE
1010	Other tests	NULL	191	3203	0.136331	0.290865	0.384846	2.3584e-32	2.76659e-30	0.377809	4.45608e-33	5.22732e-31	FALSE
479	Other upper respiratory disease	respiratory	31	224	0.0221271	0.0203414	1.08977	0.65729	0.988745	1.06145	0.760768	1	FALSE
628	Ovarian cyst	genitourinary	123	428	0.0877944	0.0388667	2.38002	3.90587e-16	1.98548e-14	2.24152	8.53997e-14	3.51985e-12	FALSE
256	Ovarian dysfunction	endocrine/metabolic	17	24	0.0121342	0.00217944	5.62368	5.76463e-08	1.83147e-06	4.75141	1.70053e-06	4.80243e-05	FALSE
625	Pain and other symptoms associated with female genital organs	genitourinary	69	444	0.0492505	0.0403197	1.23298	0.114318	0.599088	1.26784	0.07708	0.4963	FALSE
745	Pain in joint	musculoskeletal	130	806	0.0927909	0.0731929	1.29514	0.00905095	0.12663	1.23515	0.0357313	0.30741	FALSE
773	Pain in limb	symptoms	80	544	0.0571021	0.0494007	1.16534	0.214433	0.824051	1.15682	0.242859	0.834069	FALSE
512.2	Painful respiration	respiratory	13	108	0.00927909	0.00980748	0.945619	0.849634	0.988745	0.93724	0.82825	1	FALSE
427.9	Palpitations	circulatory system	68	491	0.0485368	0.0445877	1.09309	0.502133	0.988745	1.08377	0.548171	1	FALSE
792.1	Papanicolaou smear of cervix or vagina with atypical squamous cells	genitourinary	82	676	0.0585296	0.0613876	0.95055	0.673936	0.988745	0.922469	0.506513	1	FALSE
427.11	Paroxysmal supraventricular tachycardia	circulatory system	14	152	0.00999286	0.0138031	0.721171	0.244121	0.859354	0.749574	0.309679	0.930277	FALSE
614.33	Pelvic inflammatory disease, NOS	genitourinary	15	28	0.0107066	0.00254268	4.24552	6.76602e-06	0.000184253	5.25261	7.90683e-07	2.27508e-05	FALSE
614.1	Pelvic peritoneal adhesions, female (postoperative) (postinfection)	genitourinary	11	29	0.00785153	0.00263349	2.9971	0.00200301	0.0363642	2.74914	0.00515109	0.0777763	FALSE
253.1	Pituitary hyperfunction	endocrine/metabolic	15	24	0.0107066	0.00217944	4.95491	1.27144e-06	3.59064e-05	4.93527	1.92817e-06	5.3463e-05	FALSE
635.3	Placenta previa and abruptio placenta	pregnancy complications	80	1506	0.0571021	0.13676	0.382261	4.65387e-16	2.2894e-14	0.376086	2.18958e-16	1.19254e-14	FALSE
507	Pleurisy; pleural effusion	respiratory	13	96	0.00927909	0.00871776	1.06499	0.832044	0.988745	1.2806	0.411991	1	FALSE
256.4	Polycystic ovaries	endocrine/metabolic	81	254	0.0578158	0.0230657	2.59902	2.9422e-13	1.21266e-11	2.41446	3.37201e-11	1.28558e-09	FALSE
622.1	Polyp of corpus uteri	genitourinary	69	44	0.0492505	0.00399564	12.9128	2.78493e-39	4.24702e-37	10.9017	2.66926e-33	3.39218e-31	FALSE
300.9	Posttraumatic stress disorder	mental disorders	23	138	0.0164168	0.0125318	1.31519	0.227504	0.85244	1.30115	0.254846	0.856035	FALSE
642.1	Preeclampsia and eclampsia	pregnancy complications	52	1132	0.0371163	0.102797	0.336436	5.23216e-14	2.2164e-12	0.324747	1.21039e-14	5.76826e-13	FALSE
627.5	Premature menopause and other ovarian failure	genitourinary	55	40	0.0392577	0.0036324	11.2084	1.05937e-30	1.15396e-28	9.34246	1.05878e-25	8.97021e-24	FALSE
286.81	Primary hypercoagulable state	hematopoietic	60	95	0.0428266	0.00862695	5.14165	1.37351e-22	9.52093e-21	4.93613	6.64206e-21	4.40397e-19	FALSE
653	Problems associated with amniotic cavity and membranes	pregnancy complications	176	3106	0.125625	0.282056	0.365706	1.52979e-33	1.94411e-31	0.361842	9.3505e-34	1.29632e-31	FALSE
698	Pruritus and related conditions	dermatologic	49	513	0.034975	0.0465855	0.741737	0.0497237	0.385518	0.725377	0.0366727	0.310699	FALSE
590	Pyelonephritis	genitourinary	27	125	0.0192719	0.0113513	1.71149	0.0120938	0.148734	2.06309	0.000953925	0.0188927	FALSE
687.1	Rash and other nonspecific skin eruption	dermatologic	58	561	0.041399	0.0509444	0.804539	0.122749	0.623744	0.799692	0.116042	0.57456	FALSE
599.2	Retention of urine	genitourinary	11	223	0.00785153	0.0202506	0.382873	0.00196478	0.0360999	0.376949	0.00175204	0.0314337	FALSE
654.2	Rhesus isoimmunization in pregnancy	pregnancy complications	52	514	0.0371163	0.0466764	0.78729	0.106913	0.590733	0.751702	0.0572764	0.408161	FALSE
695.3	Rosacea	dermatologic	18	75	0.012848	0.00681075	1.89796	0.0152213	0.182776	1.63926	0.0641432	0.442617	FALSE
701.2	Scar conditions and fibrosis of skin	dermatologic	11	85	0.00785153	0.00771885	1.01733	0.957416	0.988745	0.939903	0.848286	1	FALSE
764	Sciatica	symptoms	29	216	0.0206995	0.019615	1.05646	0.783433	0.988745	1.02762	0.892654	1	FALSE
706.2	Sebaceous cyst	dermatologic	24	127	0.0171306	0.0115329	1.49383	0.0737009	0.464437	1.35444	0.179836	0.741215	FALSE
690.1	Seborrheic dermatitis	dermatologic	18	82	0.012848	0.00744642	1.73483	0.035386	0.30725	1.7036	0.0449783	0.354674	FALSE
702.2	Seborrheic keratosis	dermatologic	21	158	0.0149893	0.014348	1.04538	0.849596	0.988745	0.832215	0.436909	1	FALSE
287.32	Secondary thrombocytopenia	hematopoietic	10	185	0.00713776	0.0167999	0.420736	0.00789498	0.113583	0.392606	0.00427803	0.0665714	FALSE
389.1	Sensorineural hearing loss	sense organs	10	66	0.00713776	0.00599346	1.1923	0.605511	0.988745	1.14434	0.696002	1	FALSE
90	Sexually transmitted infections (not HIV or hepatitis)	infectious diseases	12	51	0.00856531	0.00463131	1.85677	0.0547024	0.395361	2.22121	0.0161341	0.173271	FALSE
512.7	Shortness of breath	respiratory	68	425	0.0485368	0.0385943	1.27076	0.0733281	0.464005	1.38396	0.0171711	0.179355	FALSE
327	Sleep disorders	neurological	13	61	0.00927909	0.00553941	1.68143	0.0903163	0.523697	1.72711	0.0791387	0.496567	FALSE
840	Sprains and strains	injuries & poisonings	29	163	0.0206995	0.014802	1.40684	0.0935709	0.538474	1.28843	0.219013	0.816613	FALSE
41.2	Streptococcus infection	infectious diseases	12	198	0.00856531	0.0179804	0.471846	0.0119042	0.147593	0.496888	0.0198808	0.198158	FALSE
624.9	stress incontinence, female	genitourinary	13	179	0.00927909	0.016255	0.566826	0.049216	0.385518	0.489378	0.0137866	0.155737	FALSE
316	Substance addiction and disorders	mental disorders	30	247	0.0214133	0.0224301	0.953676	0.808258	0.988745	1.09889	0.639103	1	FALSE
681	Superficial cellulitis and abscess	dermatologic	14	94	0.00999286	0.00853614	1.17238	0.580667	0.988745	1.17969	0.570195	1	FALSE
915	Superficial injury without mention of infection	injuries & poisonings	10	75	0.00713776	0.00681075	1.04836	0.888831	0.988745	1.10056	0.779362	1	FALSE
771.1	Swelling of limb	symptoms	28	187	0.0199857	0.0169815	1.18052	0.417412	0.988745	1.23915	0.302509	0.927714	FALSE
293.1	Swelling, mass, or lump in head and neck [Space-occupying lesion, intracranial NOS]	mental disorders	11	107	0.00785153	0.00971667	0.806529	0.498752	0.988745	0.728379	0.323375	0.946733	FALSE
741	Symptoms and disorders of the joints	musculoskeletal	14	85	0.00999286	0.00771885	1.29758	0.36877	0.988745	1.19214	0.547282	1	FALSE
561	Symptoms involving digestive system	digestive	18	110	0.012848	0.0099891	1.28992	0.319721	0.959792	1.18741	0.506744	1	FALSE
624	Symptoms involving female genital tract	genitourinary	35	270	0.0249822	0.0245187	1.01939	0.915949	0.988745	1.07046	0.712906	1	FALSE
772	Symptoms of the muscles	symptoms	16	136	0.0114204	0.0123502	0.923848	0.765722	0.988745	0.76719	0.322841	0.946733	FALSE
788	Syncope and collapse	symptoms	34	261	0.0242684	0.0237014	1.02452	0.895598	0.988745	1.04119	0.828944	1	FALSE
727.1	Synovitis and tenosynovitis	musculoskeletal	12	162	0.00856531	0.0147112	0.57862	0.0686854	0.451353	0.545444	0.0449241	0.354674	FALSE
695.42	Systemic lupus erythematosus	dermatologic	13	62	0.00927909	0.00563022	1.65416	0.100436	0.567278	1.66153	0.102704	0.561421	FALSE
427.7	Tachycardia NOS	circulatory system	37	424	0.0264097	0.0385035	0.677385	0.0249533	0.252012	0.736898	0.0824649	0.500647	FALSE
763	Thoracic or lumbosacral neuritis or radiculitis, unspecified	symptoms	12	46	0.00856531	0.00417726	2.05954	0.0263982	0.261411	1.77092	0.0833469	0.500647	FALSE
636.1	Threatened premature labor	pregnancy complications	30	139	0.0214133	0.0126226	1.71166	0.00821432	0.117073	1.84673	0.0029567	0.0484835	FALSE
287.3	Thrombocytopenia	hematopoietic	27	432	0.0192719	0.0392299	0.481259	0.000263411	0.00617433	0.462085	0.000128734	0.00311618	FALSE
242	Thyrotoxicosis with or without goiter	endocrine/metabolic	21	106	0.0149893	0.00962586	1.56567	0.0623752	0.429458	1.62734	0.0452481	0.354674	FALSE
318	Tobacco use disorder	mental disorders	31	232	0.0221271	0.0210679	1.05141	0.795436	0.988745	1.05481	0.786133	1	FALSE
250.2	Type 2 diabetes	endocrine/metabolic	21	209	0.0149893	0.0189793	0.786572	0.29795	0.927295	0.741607	0.201392	0.780288	FALSE
663	Umbilical cord complications during labor and delivery	pregnancy complications	96	2381	0.0685225	0.216219	0.266663	2.62933e-34	3.64521e-32	0.252085	1.01883e-36	1.55371e-34	FALSE
709.7	Unspecified diffuse connective tissue disease	dermatologic	14	21	0.00999286	0.00190701	5.28286	1.52661e-06	4.23286e-05	5.21421	2.54535e-06	6.93155e-05	FALSE
599.4	Urinary incontinence	genitourinary	19	211	0.0135617	0.0191609	0.703764	0.145106	0.668542	0.635377	0.0617344	0.435857	FALSE
591	Urinary tract infection	genitourinary	73	539	0.0521056	0.0489466	1.06809	0.607023	0.988745	1.16597	0.23735	0.834069	FALSE
947	Urticaria	dermatologic	30	157	0.0214133	0.0142572	1.51291	0.0397102	0.332737	1.51605	0.0410944	0.33693	FALSE
218.1	Uterine leiomyoma	neoplasms	73	369	0.0521056	0.0335089	1.58549	0.000450477	0.00981396	1.33512	0.0307607	0.277575	FALSE
614.52	Vaginitis and vulvovaginitis	genitourinary	85	471	0.0606709	0.0427715	1.44552	0.00240783	0.042697	1.5258	0.000697173	0.0146364	FALSE
671	Venous/cerebrovascular complications embolism in pregnancy and the puerperium	pregnancy complications	54	881	0.0385439	0.0800036	0.461002	6.33442e-08	1.97143e-06	0.446493	2.12097e-08	7.03149e-07	FALSE
79	Viral infection	infectious diseases	20	251	0.0142755	0.0227933	0.620891	0.0417588	0.340546	0.692449	0.120192	0.588998	FALSE
78	Viral warts & HPV	infectious diseases	25	212	0.0178444	0.0192517	0.92557	0.717	0.988745	0.846948	0.439702	1	FALSE
368	Visual disturbances	sense organs	16	154	0.0114204	0.0139847	0.814515	0.437382	0.988745	0.830298	0.485345	1	FALSE
261.4	Vitamin D deficiency	endocrine/metabolic	31	222	0.0221271	0.0201598	1.09979	0.623683	0.988745	1.22021	0.310739	0.930277	FALSE
550	Abdominal hernia	digestive											TRUE
512.3	Abnormal chest sounds	respiratory											TRUE
286.9	Abnormal coagulation profile	hematopoietic											TRUE
564.8	Abnormal findings on exam of gastrointestinal tract/ abdominal area	digestive											TRUE
346	Abnormal findings on study of brain and/or nervous system	neurological											TRUE
429.2	Abnormal function study of cardiovascular system	circulatory system											TRUE
701.5	Abnormal granulation tissue	dermatologic											TRUE
611.1	Abnormal mammogram	genitourinary											TRUE
781.2	Abnormal posture	symptoms											TRUE
350.5	Abnormal reflex	neurological											TRUE
589	Abnormal results of function study of kidney	genitourinary											TRUE
514.1	Abnormal results of function study of pulmonary system	respiratory											TRUE
794	Abnormal results of other function studies (bladder, pancreas, placenta, spleen, etc)	symptoms											TRUE
516	Abnormal sputum	respiratory											TRUE
350.2	Abnormality of gait	neurological											TRUE
289.9	Abnormality of red blood cells	hematopoietic											TRUE
614.54	Abscess or ulceration of vulva	genitourinary											TRUE
276.4	Acid-base balance disorder	endocrine/metabolic											TRUE
175	Acquired absence of breast	neoplasms											TRUE
701.6	Acquired acanthosis nigricans	dermatologic											TRUE
286.4	Acquired coagulation factor deficiency	hematopoietic											TRUE
736.2	Acquired deformities of finger	musculoskeletal											TRUE
736.1	Acquired deformities of forearm	musculoskeletal											TRUE
736.3	Acquired deformities of hip	musculoskeletal											TRUE
735	Acquired foot deformities	musculoskeletal											TRUE
283	Acquired hemolytic anemias	hematopoietic											TRUE
738.4	Acquired spondylolisthesis	musculoskeletal											TRUE
735.2	Acquired toe deformities	musculoskeletal											TRUE
253.11	Acromegaly and gigantism	endocrine/metabolic											TRUE
702.1	Actinic keratosis	dermatologic											TRUE
323.2	Acute (transverse) myelitis	neurological											TRUE
474	Acute and chronic tonsillitis	respiratory											TRUE
573.4	Acute and subacute necrosis of liver	digestive											TRUE
540.11	Acute appendicitis	digestive											TRUE
483	Acute bronchitis and bronchiolitis	respiratory											TRUE
498	Acute bronchospasm	respiratory											TRUE
938.1	Acute dermatitis due to solar radiation	dermatologic											TRUE
446.2	Acute febrile mucocutaneous lymph node syndrome (Kawasaki disease)	circulatory system											TRUE
535.1	Acute gastritis	digestive											TRUE
580.13	Acute glomerulonephritis, NOS	genitourinary											TRUE
81.11	Acute graft-versus-host disease	infectious diseases											TRUE
614.31	Acute inflammatory pelvic disease	genitourinary											TRUE
465.4	Acute laryngitis and tracheitis	respiratory											TRUE
577.1	Acute pancreatitis	digestive											TRUE
420.21	Acute pericarditis	circulatory system											TRUE
523.31	Acute periodontitis	digestive											TRUE
415.1	Acute pulmonary heart disease	circulatory system											TRUE
300.8	Acute reaction to stress	mental disorders											TRUE
394.4	Acute rheumatic heart disease	circulatory system											TRUE
474.1	Acute tonsillitis	respiratory											TRUE
441.1	Acute vascular insufficiency of intestine	circulatory system											TRUE
433.6	Acute, but ill-defined cerebrovascular disease	circulatory system											TRUE
255.1	Adrenal hyperfunction	endocrine/metabolic											TRUE
255.2	Adrenal hypofunction	endocrine/metabolic											TRUE
255.3	Adrenogenital disorders	endocrine/metabolic											TRUE
260.3	Adult failure to thrive	endocrine/metabolic											TRUE
979	Adverse drug events and drug allergies	injuries & poisonings											TRUE
967	Adverse effects of sedatives or other central nervous system depressants and anesthetics	injuries & poisonings											TRUE
317	Alcohol-related disorders	mental disorders											TRUE
317.11	Alcoholic liver damage	mental disorders											TRUE
276.42	Alkalosis	endocrine/metabolic											TRUE
371.21	Allergic conjunctivitis	sense organs											TRUE
287.2	Allergic purpura	hematopoietic											TRUE
930	Allergic reaction to food	injuries & poisonings											TRUE
704.11	Alopecia Areata	dermatologic											TRUE
270.34	Alpha-1-antitrypsin deficiency	endocrine/metabolic											TRUE
291.8	Alteration of consciousness	mental disorders											TRUE
292.4	Altered mental status	mental disorders											TRUE
110.12	Althete's foot	infectious diseases											TRUE
368.1	Amblyopia	sense organs											TRUE
270.33	Amyloidosis	endocrine/metabolic											TRUE
565.1	Anal and rectal polyp	digestive											TRUE
946	Anaphylactic shock NOS	injuries & poisonings											TRUE
285.21	Anemia in chronic kidney disease	hematopoietic											TRUE
285.22	Anemia in neoplastic disease	hematopoietic											TRUE
285.2	Anemia of chronic disease	hematopoietic											TRUE
411.41	Aneurysm and dissection of heart	circulatory system											TRUE
442.8	Aneurysm of other specified artery	circulatory system											TRUE
411.3	Angina pectoris	circulatory system											TRUE
368.3	Anisometropia	sense organs											TRUE
715.2	Ankylosing spondylitis	musculoskeletal											TRUE
759.1	Anomalies of endocrine glands, congenital	congenital anomalies											TRUE
526.3	Anomalies of jaw size/symmetry	digestive											TRUE
379.4	Anomalies of pupillary function	sense organs											TRUE
748	Anomalies of respiratory system, congenital	congenital anomalies											TRUE
524.3	Anomalies of tooth position/malocclusion	digestive											TRUE
426.4	Anomalous atrioventricular excitation	circulatory system											TRUE
260.6	Anorexia	endocrine/metabolic											TRUE
305.21	Anorexia nervosa	mental disorders											TRUE
334.2	Anterior horn cell disease	neurological											TRUE
253.4	Anterior pituitary disorders	endocrine/metabolic											TRUE
972.6	Antihypertensive agents causing adverse effects	injuries & poisonings											TRUE
963.1	Antineoplastic and immunosuppressive drugs causing adverse effects	injuries & poisonings											TRUE
301.2	Antisocial/borderline personality disorder	mental disorders											TRUE
300	Anxiety disorders	mental disorders											TRUE
442.1	Aortic aneurysm	circulatory system											TRUE
447.7	Aortic ectasia	circulatory system											TRUE
394.3	Aortic valve disease	circulatory system											TRUE
379.3	Aphakia and other disorders of lens	sense organs											TRUE
292.11	Aphasia	mental disorders											TRUE
292.1	Aphasia/speech disturbance	mental disorders											TRUE
284	Aplastic anemia	hematopoietic											TRUE
513.31	Apnea	respiratory											TRUE
540	Appendiceal conditions	digestive											TRUE
540.1	Appendicitis	digestive											TRUE
444	Arterial embolism and thrombosis	circulatory system											TRUE
444.1	Arterial embolism and thrombosis of lower extremity artery	circulatory system											TRUE
446.9	Arteritis NOS	circulatory system											TRUE
526.42	Arthralgia/ankylosis of temporomandibular joint	digestive											TRUE
713	Arthropathy associated with other disorders classified elsewhere	musculoskeletal											TRUE
716.9	Arthropathy NOS	musculoskeletal											TRUE
133	Arthropod-borne diseases	infectious diseases											TRUE
742.8	Articular cartilage disorder	musculoskeletal											TRUE
572	Ascites (non malignant)	digestive											TRUE
414.2	ASCVD	circulatory system											TRUE
733.4	Aseptic necrosis of bone	musculoskeletal											TRUE
117.4	Aspergillosis	infectious diseases											TRUE
1013	Asphyxia and hypoxemia	NULL											TRUE
440.9	Atherosclerosis of aorta	circulatory system											TRUE
440.22	Atherosclerosis of native arteries of the extremities with intermittent claudication	circulatory system											TRUE
440.1	Atherosclerosis of renal artery	circulatory system											TRUE
440.2	Atherosclerosis of the extremities	circulatory system											TRUE
427.21	Atrial fibrillation	circulatory system											TRUE
427.22	Atrial flutter	circulatory system											TRUE
426.2	Atrioventricular [AV] block	circulatory system											TRUE
426.24	Atrioventricular block, complete	circulatory system											TRUE
535.2	Atrophic gastritis	digestive											TRUE
624.2	Atrophy of female genital tract	genitourinary											TRUE
313.3	Autism	mental disorders											TRUE
279.2	Autoimmune disease NEC	endocrine/metabolic											TRUE
283.1	Autoimmune hemolytic anemias	hematopoietic											TRUE
609.11	Azoospermia and oligospermia	genitourinary											TRUE
38.3	Bacteremia	infectious diseases											TRUE
8.5	Bacterial enteritis	infectious diseases											TRUE
480.1	Bacterial pneumonia	respiratory											TRUE
539	Bariatric surgery	digestive											TRUE
530.13	Barrett's esophagus	digestive											TRUE
172.21	Basal cell carcinoma	neoplasms											TRUE
711.3	Behcet's syndrome	musculoskeletal											TRUE
227.1	Benign neoplasm of adrenal gland	neoplasms											TRUE
213	Benign neoplasm of bone and articular cartilage	neoplasms											TRUE
225.1	Benign neoplasm of brain, cranial nerves, meninges	neoplasms											TRUE
208	Benign neoplasm of colon	neoplasms											TRUE
224	Benign neoplasm of eye	neoplasms											TRUE
224.1	Benign neoplasm of eye, uveal	neoplasms											TRUE
223	Benign neoplasm of kidney and other urinary organs	neoplasms											TRUE
210	Benign neoplasm of lip, oral cavity, and pharynx	neoplasms											TRUE
229.1	Benign neoplasm of lymph nodes	neoplasms											TRUE
221	Benign neoplasm of other female genital organs	neoplasms											TRUE
211	Benign neoplasm of other parts of digestive system	neoplasms											TRUE
220	Benign neoplasm of ovary	neoplasms											TRUE
227.3	Benign neoplasm of pituitary gland and craniopharyngeal duct (pouch)	neoplasms											TRUE
225.2	Benign neoplasm of spinal cord, meninges	neoplasms											TRUE
226	Benign neoplasm of thyroid glands	neoplasms											TRUE
229	Benign neoplasm of unspecified sites	neoplasms											TRUE
596.1	Bladder neck obstruction	genitourinary											TRUE
117.3	Blastomycotic infection	infectious diseases											TRUE
367.9	Blindness and low vision	sense organs											TRUE
911	Blister	injuries & poisonings											TRUE
170.1	Bone cancer	neoplasms											TRUE
860	Bone marrow or stem cell transplant	neoplasms											TRUE
174.1	Breast cancer [female]	neoplasms											TRUE
612	Breast conditions, congenital or relating to hormones	genitourinary											TRUE
613.9	Breast disorder NOS	genitourinary											TRUE
873	Broken tooth	injuries & poisonings											TRUE
496.3	Bronchiectasis	respiratory											TRUE
497	Bronchitis	respiratory											TRUE
480.5	Bronchopneumonia and lung abscess	respiratory											TRUE
695.2	Bullous dermatoses	dermatologic											TRUE
426.3	Bundle branch block	circulatory system											TRUE
1000	Burns	NULL											TRUE
726.3	Bursitis	musculoskeletal											TRUE
727.2	Bursitis disorders	musculoskeletal											TRUE
260.1	Cachexia	endocrine/metabolic											TRUE
726.4	Calcaneal spur; Exostosis NOS	musculoskeletal											TRUE
574.2	Calculus of bile duct	digestive											TRUE
594.2	Calculus of lower urinary tract	genitourinary											TRUE
594.3	Calculus of ureter	genitourinary											TRUE
191.11	Cancer of brain	neoplasms											TRUE
191.1	Cancer of brain and nervous system	neoplasms											TRUE
165.1	Cancer of bronchus; lung	neoplasms											TRUE
170.2	Cancer of connective tissue	neoplasms											TRUE
190	Cancer of eye	neoplasms											TRUE
164	Cancer of intrathoracic organs	neoplasms											TRUE
145.3	Cancer of major salivary glands	neoplasms											TRUE
145	Cancer of mouth	neoplasms											TRUE
194	Cancer of other endocrine glands	neoplasms											TRUE
184	Cancer of other female genital organs	neoplasms											TRUE
184.2	Cancer of other female genital organs (excluding uterus and ovary)	neoplasms											TRUE
202	Cancer of other lymphoid, histiocytic tissue	neoplasms											TRUE
165	Cancer within the respiratory system	neoplasms											TRUE
195	Cancer, suspected or other	neoplasms											TRUE
112.3	Candidiasis of skin and nails	infectious diseases											TRUE
427.42	Cardiac arrest	circulatory system											TRUE
429.9	Cardiac complications, not elsewhere classified	circulatory system											TRUE
426	Cardiac conduction disorders	circulatory system											TRUE
426.92	Cardiac defibrillator in situ	circulatory system											TRUE
426.91	Cardiac pacemaker in situ	circulatory system											TRUE
747.11	Cardiac shunt/ heart septal defect	congenital anomalies											TRUE
797.1	Cardiogenic shock	symptoms											TRUE
416	Cardiomegaly	circulatory system											TRUE
277.8	Carnitine deficiencies	endocrine/metabolic											TRUE
347	Cataplexy and narcolepsy	neurological											TRUE
366	Cataract	sense organs											TRUE
557.1	Celiac disease	digestive											TRUE
681.3	Cellulitis and abscess of arm/hand	dermatologic											TRUE
681.2	Cellulitis and abscess of face/neck	dermatologic											TRUE
681.1	Cellulitis and abscess of fingers/toes	dermatologic											TRUE
681.6	Cellulitis and abscess of foot, toe	dermatologic											TRUE
681.5	Cellulitis and abscess of leg, except foot	dermatologic											TRUE
528.3	Cellulitis and abscess of oral soft tissues	digestive											TRUE
681.7	Cellulitis and abscess of trunk	dermatologic											TRUE
327.31	Central/nonobstroctive sleep apnea	neurological											TRUE
433.5	Cerebral aneurysm	circulatory system											TRUE
433.21	Cerebral artery occlusion, with cerebral infarction	circulatory system											TRUE
348.4	Cerebral cysts	neurological											TRUE
331.9	Cerebral degeneration, unspecified	neurological											TRUE
348.2	Cerebral edema and compression of brain	neurological											TRUE
433.3	Cerebral ischemia	circulatory system											TRUE
816	Cerebral laceration and contusion	injuries & poisonings											TRUE
433	Cerebrovascular disease	circulatory system											TRUE
958	Certain early complications of trauma or procedure	injuries & poisonings											TRUE
180.1	Cervical cancer	neoplasms											TRUE
765	Cervical radiculitis	symptoms											TRUE
767	Cervicocranial/Cervicobrachial syndrome	symptoms											TRUE
687.3	Changes in skin texture	dermatologic											TRUE
575.1	Cholangitis	digestive											TRUE
574.3	Cholecystitis without cholelithiasis	digestive											TRUE
574.11	Cholelithiasis with acute cholecystitis	digestive											TRUE
574.12	Cholelithiasis with other cholecystitis	digestive											TRUE
385.3	Cholesteatoma	sense organs											TRUE
575.6	Cholesterolosis of gallbladder	digestive											TRUE
363	Chorioretinal inflammations, scars, and other disorders of choroid	sense organs											TRUE
363.3	Chorioretinal scars	sense organs											TRUE
758	Chromosomal anomalies and genetic disorders	congenital anomalies											TRUE
496	Chronic airway obstruction	respiratory											TRUE
496.2	Chronic bronchitis	respiratory											TRUE
938.2	Chronic dermatitis due to solar radiation	dermatologic											TRUE
798.1	Chronic fatigue syndrome	symptoms											TRUE
580.14	Chronic glomerulonephritis, NOS	genitourinary											TRUE
81.12	Chronic graft-versus-host disease	infectious diseases											TRUE
70.4	Chronic hepatitis	infectious diseases											TRUE
614.32	Chronic inflammatory pelvic disease	genitourinary											TRUE
592.13	Chronic interstitial cystitis	genitourinary											TRUE
585.4	Chronic kidney disease, Stage I or II	genitourinary											TRUE
585.33	Chronic Kidney Disease, Stage III	genitourinary											TRUE
585.34	Chronic Kidney Disease, Stage IV	genitourinary											TRUE
473.1	Chronic laryngitis	respiratory											TRUE
495.1	Chronic obstructive asthma	respiratory											TRUE
495.11	Chronic obstructive asthma with exacerbation	respiratory											TRUE
355.1	Chronic pain syndrome	neurological											TRUE
577.2	Chronic pancreatitis	digestive											TRUE
573.1	Chronic passive congestion of liver	digestive											TRUE
420.22	Chronic pericarditis	circulatory system											TRUE
523.32	Chronic periodontitis	digestive											TRUE
415.2	Chronic pulmonary heart disease	circulatory system											TRUE
585.3	Chronic renal failure [CKD]	genitourinary											TRUE
475	Chronic sinusitis	respiratory											TRUE
245.2	Chronic thyroiditis	endocrine/metabolic											TRUE
707.2	Chronic ulcer of leg or foot	dermatologic											TRUE
707.3	Chronic ulcer of unspecified site	dermatologic											TRUE
441.2	Chronic vascular insufficiency of intestine	circulatory system											TRUE
453	Chronic venous hypertension	circulatory system											TRUE
456	Chronic venous insufficiency [CVI]	circulatory system											TRUE
327.6	Circadian rhythm sleep disorder	neurological											TRUE
459.9	Circulatory disease NEC	circulatory system											TRUE
701.3	Circumscribed scleroderma	dermatologic											TRUE
571.51	Cirrhosis of liver without mention of alcohol	digestive											TRUE
749.1	Cleft palate	congenital anomalies											TRUE
117.2	Coccidioidomycosis	infectious diseases											TRUE
803.21	Colles' fracture	injuries & poisonings											TRUE
153.2	Colon cancer	neoplasms											TRUE
368.5	Color vision deficiencies	sense organs											TRUE
153	Colorectal cancer	neoplasms											TRUE
355	Complex regional/central pain syndrome	neurological											TRUE
859	Complication due to other implant and internal device	injuries & poisonings											TRUE
853	Complication of colostomy or enterostomy	injuries & poisonings											TRUE
858	Complication of internal orthopedic device	injuries & poisonings											TRUE
855	Complication of nervous system device, implant, and graft	injuries & poisonings											TRUE
639	Complications following abortion or ectopic and molar pregnancies	pregnancy complications											TRUE
854	Complications of cardiac/vascular device, implant, and graft	injuries & poisonings											TRUE
536.7	Complications of gastrostomy, colostomy and enterostomy	digestive											TRUE
679	Complications of in utero procedures	pregnancy complications											TRUE
668	Complications of the administration of anesthetic or other sedation in labor and delivery	pregnancy complications											TRUE
817	Concussion	injuries & poisonings											TRUE
656.7	Conditions involving the integument and temperature regulation of fetus and newborn	pregnancy complications											TRUE
312	Conduct disorders	mental disorders											TRUE
389.2	Conductive hearing loss	sense organs											TRUE
756.1	Congenital anomalies of abdominal wall; diaphram	congenital anomalies											TRUE
612.3	Congenital anomalies of breast	genitourinary											TRUE
749	Congenital anomalies of face and neck	congenital anomalies											TRUE
751.1	Congenital anomalies of genital organs	congenital anomalies											TRUE
747.13	Congenital anomalies of great vessels	congenital anomalies											TRUE
750.21	Congenital anomalies of intestine	congenital anomalies											TRUE
755	Congenital anomalies of limbs	congenital anomalies											TRUE
751.12	Congenital anomalies of male genital organs	congenital anomalies											TRUE
750.13	Congenital anomalies of mouth/tongue	congenital anomalies											TRUE
756.3	Congenital anomalies of muscle, tendon, fascia, and connective tissue	congenital anomalies											TRUE
747.2	Congenital anomalies of peripheral vascular system	congenital anomalies											TRUE
753.2	Congenital anomalies of posterior segment of eye	congenital anomalies											TRUE
691	Congenital anomalies of skin	dermatologic											TRUE
749.2	Congenital anomalies of skull and face bones	congenital anomalies											TRUE
750.15	Congenital anomalies of stomach	congenital anomalies											TRUE
753	Congenital anomalies of the eye	congenital anomalies											TRUE
757	Congenital anomalies of the integument	congenital anomalies											TRUE
755.4	Congenital anomalies of upper limb, including shoulder girdle	congenital anomalies											TRUE
751.2	Congenital anomalies of urinary system	congenital anomalies											TRUE
755.3	Congenital anomaly of fingers/toes	congenital anomalies											TRUE
750.22	Congenital anomaly of gallbladder, bile ducts, liver, pancreas	congenital anomalies											TRUE
753.1	Congenital cataract and lens anomalies	congenital anomalies											TRUE
286.1	Congenital coagulation defects	hematopoietic											TRUE
286.12	Congenital deficiency of other clotting factors (including factor VII)	hematopoietic											TRUE
755.1	Congenital deformities of feet	congenital anomalies											TRUE
286.13	Congenital factor VIII disorder	hematopoietic											TRUE
755.61	Congenital hip dysplasia and deformity	congenital anomalies											TRUE
750.5	Congenital hypertrophic pyloric stenosis	congenital anomalies											TRUE
244.5	Congenital hypothyroidism	endocrine/metabolic											TRUE
754	Congenital musculoskeletal deformities of spine	congenital anomalies											TRUE
756.5	Congenital osteodystrophies	congenital anomalies											TRUE
691.3	Congenital pigmentary anomalies of skin	dermatologic											TRUE
428.1	Congestive heart failure (CHF) NOS	circulatory system											TRUE
371.2	Conjunctivitis, noninfectious	sense organs											TRUE
284.2	Constitutional aplastic anemia	hematopoietic											TRUE
939.1	Contact and allergic dermatitis of eyelid	dermatologic											TRUE
931	Contact dermatitis and other eczema due to plants [except food]	dermatologic											TRUE
739	Contracture of joint	musculoskeletal											TRUE
728.71	Contracture of palmar fascia [Dupuytren's disease]	musculoskeletal											TRUE
364.9	Cornea replaced by transplant	sense organs											TRUE
364.4	Corneal degenerations	sense organs											TRUE
364.2	Corneal edema	sense organs											TRUE
364.1	Corneal opacity	sense organs											TRUE
364	Corneal opacity and other disorders of cornea	sense organs											TRUE
370.1	Corneal ulcer	sense organs											TRUE
700	Corns and callosities	dermatologic											TRUE
411.4	Coronary atherosclerosis	circulatory system											TRUE
733.6	Costochondritis	musculoskeletal											TRUE
771.2	Cramp of limb	symptoms											TRUE
1006	Crushing injury	NULL											TRUE
1008	Crushing or internal injury to organs	NULL											TRUE
737	Curvature of spine	musculoskeletal											TRUE
255.11	Cushing's syndrome	endocrine/metabolic											TRUE
695.41	Cutaneous lupus erythematosus	dermatologic											TRUE
577.3	Cyst and pseudocyst of pancreas	digestive											TRUE
733.2	Cyst of bone	musculoskeletal											TRUE
586.2	Cyst of kidney, acquired	genitourinary											TRUE
528.41	Cyst of the salivary gland	digestive											TRUE
614.53	Cyst or abscess of Bartholin's gland	genitourinary											TRUE
499	Cystic fibrosis	respiratory											TRUE
751.21	Cystic kidney disease	congenital anomalies											TRUE
592.1	Cystitis	genitourinary											TRUE
362.23	Cystoid macular degeneration of retina	sense organs											TRUE
526.1	Cysts of the jaws	digestive											TRUE
302.1	Decreased libido	mental disorders											TRUE
288.1	Decreased white blood cell count	hematopoietic											TRUE
707.1	Decubitus ulcer	dermatologic											TRUE
452.2	Deep vein thrombosis [DVT]	circulatory system											TRUE
286.6	Defibrination syndrome	hematopoietic											TRUE
281.9	Deficiency anemias	hematopoietic											TRUE
279.11	Deficiency of humoral immunity	endocrine/metabolic											TRUE
334	Degenerative disease of the spinal cord	neurological											TRUE
702	Degenerative skin conditions and other dermatoses	dermatologic											TRUE
702.4	Degenerative skin disorders	dermatologic											TRUE
259.3	Delay in sexual development and puberty NEC	endocrine/metabolic											TRUE
290	Delirium dementia and amnestic and other cognitive disorders	mental disorders											TRUE
290.2	Delirium due to conditions classified elsewhere	mental disorders											TRUE
521.1	Dental caries	digestive											TRUE
524	Dentofacial anomalies, including malocclusion	digestive											TRUE
509.8	Dependence on respirator [Ventilator] or supplemental oxygen	respiratory											TRUE
938	Dermatitis due to solar radiation	dermatologic											TRUE
695.21	Dermatitis herpetiformis	dermatologic											TRUE
709.5	Dermatomyositis	dermatologic											TRUE
110.1	Dermatophytosis	infectious diseases											TRUE
110.11	Dermatophytosis of nail	infectious diseases											TRUE
110.13	Dermatophytosis of the body	infectious diseases											TRUE
315	Develomental delays and disorders	mental disorders											TRUE
253.3	Diabetes insipidus	endocrine/metabolic											TRUE
250	Diabetes mellitus	endocrine/metabolic											TRUE
250.7	Diabetic retinopathy	endocrine/metabolic											TRUE
550.2	Diaphragmatic hernia	digestive											TRUE
741.3	Difficulty in walking	musculoskeletal											TRUE
368.2	Diplopia and disorders of binocular vision	sense organs											TRUE
448	Disease of capillaries	circulatory system											TRUE
394.7	Disease of tricuspid valve	circulatory system											TRUE
529	Diseases and other conditions of the tongue	digestive											TRUE
31	Diseases due to other mycobacteria	infectious diseases											TRUE
530	Diseases of esophagus	digestive											TRUE
528.5	Diseases of lips	digestive											TRUE
703	Diseases of nail, NOS	dermatologic											TRUE
577	Diseases of pancreas	digestive											TRUE
706	Diseases of sebaceous glands	dermatologic											TRUE
289.5	Diseases of spleen	hematopoietic											TRUE
526	Diseases of the jaws	digestive											TRUE
473	Diseases of the larynx and vocal cords	respiratory											TRUE
528	Diseases of the oral soft tissues, excluding lesions specific for gingiva and tongue	digestive											TRUE
527	Diseases of the salivary glands	digestive											TRUE
254	Diseases of thymus gland	endocrine/metabolic											TRUE
288	Diseases of white blood cells	hematopoietic											TRUE
830	Dislocation	injuries & poisonings											TRUE
279	Disorders involving the immune mechanism	endocrine/metabolic											TRUE
368.7	Disorders of accommodation	sense organs											TRUE
389.5	Disorders of acoustic nerve	sense organs											TRUE
255	Disorders of adrenal glands	endocrine/metabolic											TRUE
270.2	Disorders of amino-acid metabolism	endocrine/metabolic											TRUE
277.4	Disorders of bilirubin excretion	endocrine/metabolic											TRUE
275.5	Disorders of calcium/phosphorus metabolism	endocrine/metabolic											TRUE
724.2	Disorders of coccyx	musculoskeletal											TRUE
372	Disorders of conjunctiva	sense organs											TRUE
513.8	Disorders of diaphragm	respiratory											TRUE
530.5	Disorders of esophageal motility	digestive											TRUE
380	Disorders of external ear	sense organs											TRUE
379.5	Disorders of iris and ciliary body	sense organs											TRUE
275.1	Disorders of iron metabolism	hematopoietic											TRUE
375	Disorders of lacrimal system	sense organs											TRUE
275.3	Disorders of magnesium metabolism	endocrine/metabolic											TRUE
275	Disorders of mineral metabolism	endocrine/metabolic											TRUE
728	Disorders of muscle, ligament, and fascia	musculoskeletal											TRUE
377	Disorders of optic nerve and visual pathways	sense organs											TRUE
352	Disorders of other cranial nerves	neurological											TRUE
252	Disorders of parathyroid gland	endocrine/metabolic											TRUE
275.53	Disorders of phosphorus metabolism	endocrine/metabolic											TRUE
270.3	Disorders of plasma protein metabolism	endocrine/metabolic											TRUE
277.1	Disorders of porphyrin metabolism	endocrine/metabolic											TRUE
367	Disorders of refraction and accommodation; blindness and low vision	sense organs											TRUE
724.1	Disorders of sacrum	musculoskeletal											TRUE
705	Disorders of sweat glands	dermatologic											TRUE
337	Disorders of the autonomic nervous system	neurological											TRUE
360	Disorders of the globe	sense organs											TRUE
253	Disorders of the pituitary gland and its hypothalamic control	endocrine/metabolic											TRUE
379.2	Disorders of vitreous body	sense organs											TRUE
588	Disorders resulting from impaired renal function	genitourinary											TRUE
527.7	Disturbance of salivary secretion	digestive											TRUE
520.2	Disturbances in tooth eruption	digestive											TRUE
270.1	Disturbances of amino-acid transport	endocrine/metabolic											TRUE
350.6	Disturbances of sensation of smell and taste	neurological											TRUE
562.2	Diverticulitis	digestive											TRUE
562.1	Diverticulosis	digestive											TRUE
362.27	Drusen (degenerative) of retina	sense organs											TRUE
375.1	Dry eyes	sense organs											TRUE
531.3	Duodenal ulcer	digestive											TRUE
535.6	Duodenitis	digestive											TRUE
705.1	Dyshidrosis	dermatologic											TRUE
536.8	Dyspepsia and other specified disorders of function of stomach	digestive											TRUE
532	Dysphagia	digestive											TRUE
620	Dysplasia of female genital organs	genitourinary											TRUE
300.4	Dysthymic disorder	mental disorders											TRUE
624.1	Dystrophy of female genital tract	genitourinary											TRUE
41.4	E. coli	infectious diseases											TRUE
305.2	Eating disorder	mental disorders											TRUE
634.3	Ectopic pregnancy	pregnancy complications											TRUE
374.1	Ectropion or entropion	sense organs											TRUE
1014	Effects of heat, cold and air pressure	NULL											TRUE
990	Effects radiation NOS	injuries & poisonings											TRUE
276.1	Electrolyte imbalance	endocrine/metabolic											TRUE
790.8	Elevated C-reactive protein (CRP)	symptoms											TRUE
790.1	Elevated sedimentation rate	symptoms											TRUE
496.1	Emphysema	respiratory											TRUE
506	Empyema and pneumothorax	respiratory											TRUE
323	Encephalitis	neurological											TRUE
323.8	Encephalitis, non-infectious	neurological											TRUE
348.8	Encephalopathy, not elsewhere classified	neurological											TRUE
585.32	End stage renal disease	genitourinary											TRUE
420.3	Endocarditis	circulatory system											TRUE
656.3	Endocrine and metabolic disturbances of fetus and newborn	pregnancy complications											TRUE
621	Endometrial hyperplasia	genitourinary											TRUE
288.3	Eosinophilia	hematopoietic											TRUE
530.15	Eosinophilic esophagitis	digestive											TRUE
345.1	Epilepsy	neurological											TRUE
375.2	Epiphora	sense organs											TRUE
695.81	Erythema nodosum	dermatologic											TRUE
690	Erythematosquamous dermatosis	dermatologic											TRUE
530.2	Esophageal bleeding (varices/hemorrhage)	digestive											TRUE
530.1	Esophagitis, GERD and related diseases	digestive											TRUE
381.2	Eustachian tube disorders	sense organs											TRUE
242.3	Exophthalmos	endocrine/metabolic											TRUE
333	Extrapyramidal disease and abnormal movement disorders	neurological											TRUE
369.2	Eye infection, viral	sense organs											TRUE
352.2	Facial nerve disorders [CN7]	neurological											TRUE
772.6	Facial weakness	symptoms											TRUE
264.2	Failure to thrive (childhood)	endocrine/metabolic											TRUE
728.7	Fasciitis	musculoskeletal											TRUE
550.3	Femoral hernia	digestive											TRUE
610.2	Fibroadenosis of breast	genitourinary											TRUE
610.3	Fibrosclerosis of breast	genitourinary											TRUE
426.21	First degree AV block	circulatory system											TRUE
735.1	Flat foot	musculoskeletal											TRUE
276.6	Fluid overload	endocrine/metabolic											TRUE
803.3	Fracture of clavicle or scapula	injuries & poisonings											TRUE
801.1	Fracture of foot	injuries & poisonings											TRUE
804	Fracture of hand or wrist	injuries & poisonings											TRUE
803.1	Fracture of humerus	injuries & poisonings											TRUE
800	Fracture of lower limb	injuries & poisonings											TRUE
800.1	Fracture of neck of femur	injuries & poisonings											TRUE
800.4	Fracture of patella	injuries & poisonings											TRUE
802	Fracture of pelvis	injuries & poisonings											TRUE
803.2	Fracture of radius and ulna	injuries & poisonings											TRUE
807	Fracture of ribs	injuries & poisonings											TRUE
800.3	Fracture of tibia and fibula	injuries & poisonings											TRUE
809	Fracture of unspecified bones	injuries & poisonings											TRUE
800.2	Fracture of unspecified part of femur	injuries & poisonings											TRUE
803	Fracture of upper limb	injuries & poisonings											TRUE
805	Fracture of vertebral column without mention of spinal cord injury	injuries & poisonings											TRUE
564	Functional digestive disorders	digestive											TRUE
596.5	Functional disorders of bladder	genitourinary											TRUE
612.1	Galactorrhea	genitourinary											TRUE
727.4	Ganglion and cyst of synovium, tendon, and bursa	musculoskeletal											TRUE
791	Gangrene	symptoms											TRUE
531.2	Gastric ulcer	digestive											TRUE
530.7	Gastroesophageal laceration-hemorrhage syndrome	digestive											TRUE
569.2	Gastrointestinal complications	digestive											TRUE
303.31	Gastrointestinal malfunction arising from mental factors	mental disorders											TRUE
531.5	Gastrojejunal ulcer	digestive											TRUE
536.3	Gastroparesis	digestive											TRUE
345.11	Generalized convulsive epilepsy	neurological											TRUE
618	Genital prolapse	genitourinary											TRUE
736.4	Genu valgum or varum (acquired)	musculoskeletal											TRUE
523	Gingival and periodontal diseases	digestive											TRUE
523.1	Gingivitis	digestive											TRUE
365	Glaucoma	sense organs											TRUE
529.1	Glossitis	digestive											TRUE
529.6	Glossodynia	digestive											TRUE
255.21	Glucocorticoid deficiency	endocrine/metabolic											TRUE
250.5	Glycosuria or Acetonuria	endocrine/metabolic											TRUE
90.2	Gonococcal infections	infectious diseases											TRUE
274.1	Gout	endocrine/metabolic											TRUE
274.11	Gouty arthropathy	endocrine/metabolic											TRUE
81.1	Graft-versus-host disease	infectious diseases											TRUE
38.1	Gram negative septicemia	infectious diseases											TRUE
38.2	Gram positive septicemia	infectious diseases											TRUE
242.1	Graves' disease	endocrine/metabolic											TRUE
593.1	Gross hematuria	genitourinary											TRUE
41.8	H. pylori	infectious diseases											TRUE
292.6	Hallucinations	mental disorders											TRUE
735.3	Hallux valgus (Bunion)	musculoskeletal											TRUE
428.2	Heart failure NOS	circulatory system											TRUE
428.4	Heart failure with preserved EF [Diastolic heart failure]	circulatory system											TRUE
428.3	Heart failure with reduced EF [Systolic or combined heart failure]	circulatory system											TRUE
429.1	Heart transplant/surgery	circulatory system											TRUE
395	Heart valve disorders	circulatory system											TRUE
395.6	Heart valve replaced	circulatory system											TRUE
134	Helminthiases	infectious diseases											TRUE
228	Hemangioma and lymphangioma, any site	neoplasms											TRUE
741.5	Hemarthrosis	musculoskeletal											TRUE
578.1	Hematemesis	digestive											TRUE
656.5	Hematological disorders of newborn	pregnancy complications											TRUE
342	Hemiplegia	neurological											TRUE
285.8	Hemoglobinuria	hematopoietic											TRUE
516.1	Hemoptysis	respiratory											TRUE
635	Hemorrhage during pregnancy; childbirth and postpartum	pregnancy complications											TRUE
531.1	Hemorrhage from gastrointestinal ulcer	digestive											TRUE
656.4	Hemorrhage of fetus or newborn	pregnancy complications											TRUE
578.9	Hemorrhage of gastrointestinal tract	digestive											TRUE
850	Hemorrhage or hematoma complicating a procedure	injuries & poisonings											TRUE
286.5	Hemorrhagic disorder due to intrinsic circulating anticoagulants	hematopoietic											TRUE
70.9	Hepatitis NOS	infectious diseases											TRUE
573.3	Hepatomegaly	digestive											TRUE
356	Hereditary and idiopathic peripheral neuropathy	neurological											TRUE
520.1	Hereditary disturbances in tooth structure	digestive											TRUE
275.11	Hereditary hemochromatosis	hematopoietic											TRUE
362.7	Hereditary retinal dystrophies	sense organs											TRUE
53	Herpes zoster	infectious diseases											TRUE
53.1	Herpes zoster with nervous system complications	infectious diseases											TRUE
705.3	Hidradenitis	dermatologic											TRUE
704.2	Hirsutism	dermatologic											TRUE
117.1	Histoplasmosis	infectious diseases											TRUE
71.1	HIV infection, symptomatic	infectious diseases											TRUE
201	Hodgkin's disease	neoplasms											TRUE
71	Human immunodeficiency virus [HIV] disease	infectious diseases											TRUE
603.1	Hydrocele	genitourinary											TRUE
331.1	Hydrocephalus	neurological											TRUE
255.12	Hyperaldosteronism	endocrine/metabolic											TRUE
275.6	Hypercalcemia	endocrine/metabolic											TRUE
272.11	Hypercholesterolemia	endocrine/metabolic											TRUE
272.14	Hyperchylomicronemia	endocrine/metabolic											TRUE
286.8	Hypercoagulable state	hematopoietic											TRUE
272.12	Hyperglyceridemia	endocrine/metabolic											TRUE
367.8	Hypermetropia	sense organs											TRUE
276.11	Hyperosmolality and/or hypernatremia	endocrine/metabolic											TRUE
252.1	Hyperparathyroidism	endocrine/metabolic											TRUE
276.13	Hyperpotassemia	endocrine/metabolic											TRUE
446.3	Hypersensitivity angiitis	circulatory system											TRUE
327.1	Hypersomnia	neurological											TRUE
401	Hypertension	circulatory system											TRUE
401.22	Hypertensive chronic kidney disease	circulatory system											TRUE
401.2	Hypertensive heart and/or renal disease	circulatory system											TRUE
401.21	Hypertensive heart disease	circulatory system											TRUE
425.11	Hypertrophic obstructive cardiomyopathy	circulatory system											TRUE
612.2	Hypertrophy of breast (Gynecomastia)	genitourinary											TRUE
527.1	Hypertrophy of salivary gland	digestive											TRUE
513.4	Hyperventilation	respiratory											TRUE
275.51	Hypocalcemia	endocrine/metabolic											TRUE
251.1	Hypoglycemia	endocrine/metabolic											TRUE
252.2	Hypoparathyroidism	endocrine/metabolic											TRUE
276.12	Hyposmolality and/or hyponatremia	endocrine/metabolic											TRUE
458	Hypotension	circulatory system											TRUE
458.9	Hypotension NOS	circulatory system											TRUE
780	Hypothermia/Chills	symptoms											TRUE
360.3	Hypotony of eye	sense organs											TRUE
513.3	Hypoventilation	respiratory											TRUE
258	Iatrogenic endocrine disorders	endocrine/metabolic											TRUE
458.2	Iatrogenic hypotension	circulatory system											TRUE
691.1	Ichthyosis congenita	dermatologic											TRUE
504.1	Idiopathic fibrosing alveolitis	respiratory											TRUE
559	Ileostomy status	digestive											TRUE
279.1	Immunity deficiency	endocrine/metabolic											TRUE
380.4	Impacted cerumen	sense organs											TRUE
560.2	Impaction of intestine	digestive											TRUE
686.2	Impetigo	dermatologic											TRUE
312.3	Impulse control disorder	mental disorders											TRUE
550.6	Incisional hernia	digestive											TRUE
343	Infantile cerebral palsy	neurological											TRUE
369	Infection of the eye	sense organs											TRUE
41.9	Infection with drug-resistant microorganisms	infectious diseases											TRUE
81	Infection/inflammation of internal prosthetic device; implant; and graft	infectious diseases											TRUE
657	Infections specific to the perinatal period	pregnancy complications											TRUE
79.2	Infectious mononucleosis	infectious diseases											TRUE
712	Infective connective tissue disorders	musculoskeletal											TRUE
609.1	Infertility, male	genitourinary											TRUE
132	Infestation (lice, mites)	infectious diseases											TRUE
371	Inflammation of the eye	sense organs											TRUE
357	Inflammatory and toxic neuropathy	neurological											TRUE
526.5	Inflammatory conditions of jaw	digestive											TRUE
613.1	Inflammatory disease of breast	genitourinary											TRUE
614.5	Inflammatory disease of cervix, vagina, and vulva	genitourinary											TRUE
614	Inflammatory diseases of female pelvic organs	genitourinary											TRUE
481	Influenza	respiratory											TRUE
942	Infusion and transfusion reaction	injuries & poisonings											TRUE
703.1	Ingrowing nail	dermatologic											TRUE
550.1	Inguinal hernia	digestive											TRUE
907	Injuries to the nervous system	injuries & poisonings											TRUE
1007	Injury to blood vessels	NULL											TRUE
957	Injury to other and unspecified nerves	injuries & poisonings											TRUE
912	Insect bite	injuries & poisonings											TRUE
250.3	Insulin pump user	endocrine/metabolic											TRUE
835	Internal derangement of knee	injuries & poisonings											TRUE
722.7	Intervertebral disc disorder with myelopathy	musculoskeletal											TRUE
134.1	Intestinal helminthiases	infectious diseases											TRUE
8	Intestinal infection	infectious diseases											TRUE
8.52	Intestinal infection due to C. difficile	infectious diseases											TRUE
8.7	Intestinal infection due to protozoa	infectious diseases											TRUE
557	Intestinal malabsorption (non-celiac)	digestive											TRUE
430.2	Intracerebral hemorrhage	circulatory system											TRUE
430	Intracranial hemorrhage	circulatory system											TRUE
818	Intracranial hemorrhage (injury)	injuries & poisonings											TRUE
280.2	Iron deficiency anemia secondary to blood loss (chronic)	hematopoietic											TRUE
656.1	Isoimmunization of fetus or newborn	pregnancy complications											TRUE
573.5	Jaundice (not of newborn)	digestive											TRUE
732.1	Juvenile osteochondrosis	musculoskeletal											TRUE
714.2	Juvenile rheumatoid arthritis	musculoskeletal											TRUE
701.4	Keloid scar	dermatologic											TRUE
370	Keratitis	sense organs											TRUE
370.3	Keratoconjunctivitis	sense organs											TRUE
364.41	Keratoconus	sense organs											TRUE
701.1	Keratoderma, acquired	dermatologic											TRUE
587	Kidney replaced by transpant	genitourinary											TRUE
737.1	Kyphosis (acquired)	musculoskeletal											TRUE
386.3	Labyrinthitis	sense organs											TRUE
350.3	Lack of coordination	neurological											TRUE
264.9	Lack of normal physiological development, unspecified	endocrine/metabolic											TRUE
374.2	Lagophthalmos	sense organs											TRUE
202.24	Large cell lymphoma	neoplasms											TRUE
1012	Late effect	NULL											TRUE
433.8	Late effects of cerebrovascular disease	circulatory system											TRUE
728.2	Laxity of ligament or hypermobility syndrome	musculoskeletal											TRUE
315.1	Learning disorder	mental disorders											TRUE
426.32	Left bundle branch block	circulatory system											TRUE
204	Leukemia	neoplasms											TRUE
528.6	Leukoplakia of oral mucosa	digestive											TRUE
214	Lipoma	neoplasms											TRUE
214.1	Lipoma of skin and subcutaneous tissue	neoplasms											TRUE
277.51	Lipoprotein disorders	endocrine/metabolic											TRUE
571.8	Liver abscess and sequelae of chronic liver disease	digestive											TRUE
573.2	Liver replaced by transplant	digestive											TRUE
278.3	Localized adiposity	endocrine/metabolic											TRUE
742.1	Loose body in joint	musculoskeletal											TRUE
525.1	Loss of teeth or edentulism	digestive											TRUE
754.1	Lumbosacral spondylolysis, congenital	congenital anomalies											TRUE
500	Lung disease due to external agents	respiratory											TRUE
510.2	Lung transplant	respiratory											TRUE
695.4	Lupus (localized and systemic)	dermatologic											TRUE
130.1	Lyme disease	infectious diseases											TRUE
204.11	Lymphoid leukemia, acute	neoplasms											TRUE
202.23	Lymphosarcoma	neoplasms											TRUE
362.26	Macular puckering of retina	sense organs											TRUE
647.3	Major puerperal infection	pregnancy complications											TRUE
189.21	Malignant neoplasm of bladder	neoplasms											TRUE
174.11	Malignant neoplasm of female breast	neoplasms											TRUE
189.11	Malignant neoplasm of kidney, except pelvis	neoplasms											TRUE
155.1	Malignant neoplasm of liver, primary	neoplasms											TRUE
189.4	Malignant neoplasm of other urinary organs	neoplasms											TRUE
184.11	Malignant neoplasm of ovary	neoplasms											TRUE
153.3	Malignant neoplasm of rectum, rectosigmoid junction, and anus	neoplasms											TRUE
159.4	Malignant neoplasm of retroperitoneum and peritoneum	neoplasms											TRUE
159.2	Malignant neoplasm of small intestine, including duodenum	neoplasms											TRUE
182	Malignant neoplasm of uterus	neoplasms											TRUE
195.1	Malignant neoplasm, other	neoplasms											TRUE
733.8	Malunion and nonunion of fracture	musculoskeletal											TRUE
611.11	Mammographic microcalcification	genitourinary											TRUE
191	Manlignant and unknown neoplasms of brain and nervous system	neoplasms											TRUE
381.3	Mastoiditis & related conditions	sense organs											TRUE
255.13	Medulloadrenal hyperfunction	endocrine/metabolic											TRUE
172.11	Melanomas of skin	neoplasms											TRUE
292.3	Memory loss	mental disorders											TRUE
386.1	Meniere's disease	sense organs											TRUE
320	Meningitis	neurological											TRUE
315.3	Mental retardation	mental disorders											TRUE
41.12	Methicillin resistant Staphylococcus aureus	infectious diseases											TRUE
41.11	Methicillin sensitive Staphylococcus aureus	infectious diseases											TRUE
593.2	Microscopic hematuria	genitourinary											TRUE
292.2	Mild cognitive impairment	mental disorders											TRUE
634	Miscarriage; stillbirth	pregnancy complications											TRUE
634.1	Missed abortion/Hydatidiform mole	pregnancy complications											TRUE
394.2	Mitral valve disease	circulatory system											TRUE
394.1	Mitral valve stenosis and aortic valve stenosis	circulatory system											TRUE
626.21	Mittelschmerz	genitourinary											TRUE
272.13	Mixed hyperlipidemia	endocrine/metabolic											TRUE
204.3	Monocytic leukemia	neoplasms											TRUE
433.32	Moyamoya disease	circulatory system											TRUE
480.13	MRSA pneumonia	respiratory											TRUE
204.4	Multiple myeloma	neoplasms											TRUE
335	Multiple sclerosis	neurological											TRUE
772.3	Muscle weakness	symptoms											TRUE
728.1	Muscular calcification and ossification	musculoskeletal											TRUE
359.1	Muscular dystrophies	neurological											TRUE
772.1	Muscular wasting and disuse atrophy	symptoms											TRUE
358.1	Myasthenia gravis	neurological											TRUE
117	Mycoses	infectious diseases											TRUE
204.21	Myeloid leukemia, acute	neoplasms											TRUE
204.22	Myeloid leukemia, chronic	neoplasms											TRUE
200	Myeloproliferative disease	neoplasms											TRUE
411.2	Myocardial infarction	circulatory system											TRUE
420.1	Myocarditis	circulatory system											TRUE
333.2	Myoclonus	neurological											TRUE
359.2	Myopathy	neurological											TRUE
384.1	Myringitis	sense organs											TRUE
471	Nasal polyps	respiratory											TRUE
199	Neoplasm of uncertain behavior	neoplasms											TRUE
174.3	Neoplasm of uncertain behavior of breast	neoplasms											TRUE
158	Neoplasm of unspecified nature of digestive system	neoplasms											TRUE
580.31	Nephritis and nephropathy in diseases classified elsewhere	genitourinary											TRUE
580.32	Nephritis and nephropathy with pathological lesion	genitourinary											TRUE
580.2	Nephrotic syndrome without mention of glomerulonephritis	genitourinary											TRUE
353.1	Nerve plexus lesions	neurological											TRUE
353	Nerve root and plexus disorders	neurological											TRUE
752	Nervous system congenital anomalies	congenital anomalies											TRUE
752.1	Neural tube defects	congenital anomalies											TRUE
766	Neuralgia, neuritis, and radiculitis NOS	symptoms											TRUE
209	Neuroendocrine tumors	neoplasms											TRUE
199.4	Neurofibromatosis	neoplasms											TRUE
292	Neurological disorders	mental disorders											TRUE
288.11	Neutropenia	hematopoietic											TRUE
217.1	Nevus, non-neoplastic	neoplasms											TRUE
202.21	Nodular lymphoma	neoplasms											TRUE
283.2	Non-autoimmune hemolytic anemias	hematopoietic											TRUE
875	Non-healing surgical wound	injuries & poisonings											TRUE
202.2	Non-Hodgkins lymphoma	neoplasms											TRUE
580.12	Non-proliferative glomerulonephritis	genitourinary											TRUE
769	Nonallopathic lesions NEC	symptoms											TRUE
371.33	Noninfectious dermatoses of eyelid	sense organs											TRUE
450	Noninfectious disorders of lymphatic channels	circulatory system											TRUE
395.2	Nonrheumatic aortic valve disorders	circulatory system											TRUE
395.4	Nonrheumatic pulmonary valve disorders	circulatory system											TRUE
395.3	Nonrheumatic tricuspid valve disorders	circulatory system											TRUE
346.3	Nonspecific abnormal findings in cerebrospinal fluid	neurological											TRUE
579.8	Nonspecific abnormal findings in stool contents	digestive											TRUE
575.9	Nonspecific abnormal findings on radiological and other examination of biliary tract	digestive											TRUE
793	Nonspecific abnormal findings on radiological and other examination of musculoskeletal system	symptoms											TRUE
346.1	Nonspecific abnormal findings on radiological and other examination of skull and head	neurological											TRUE
346.2	Nonspecific abnormal results of function study of brain and central nervous system	neurological											TRUE
259.1	Nonspecific abnormal results of other endocrine function study	endocrine/metabolic											TRUE
573.6	Nonspecific elevation of levels of transaminase or lactic acid dehydrogenase [LDH]	digestive											TRUE
790	Nonspecific findings on examination of blood	symptoms											TRUE
241.2	Nontoxic multinodular goiter	endocrine/metabolic											TRUE
241	Nontoxic nodular goiter	endocrine/metabolic											TRUE
241.1	Nontoxic uninodular goiter	endocrine/metabolic											TRUE
729.7	Nontraumatic compartment syndrome	musculoskeletal											TRUE
260.22	Nutritional marasmus	endocrine/metabolic											TRUE
378.2	Nystagmus and other irregular eye movements	sense organs											TRUE
300.3	Obsessive-compulsive disorders	mental disorders											TRUE
496.21	Obstructive chronic bronchitis	respiratory											TRUE
751.3	Obstructive genitourinary defect	congenital anomalies											TRUE
327.32	Obstructive sleep apnea	neurological											TRUE
433.1	Occlusion and stenosis of precerebral arteries	circulatory system											TRUE
433.2	Occlusion of cerebral arteries	circulatory system											TRUE
599.6	Oliguria and anuria	genitourinary											TRUE
870.2	Open wound of ear	injuries & poisonings											TRUE
871.3	Open wound of foot except toe(s) alone	injuries & poisonings											TRUE
870.8	Open wound of genital organs	injuries & poisonings											TRUE
871.1	Open wound of hand except finger(s)	injuries & poisonings											TRUE
870.5	Open wound of lip and mouth	injuries & poisonings											TRUE
871.4	Open wound of toe(s)	injuries & poisonings											TRUE
870.1	Open wound or laceration of eye or eyelid	injuries & poisonings											TRUE
871	Open wounds of extremities	injuries & poisonings											TRUE
870	Open wounds of head; neck; and trunk	injuries & poisonings											TRUE
365.1	Open-angle glaucoma	sense organs											TRUE
965.1	Opiates and related narcotics causing adverse effects in therapeutic use	injuries & poisonings											TRUE
377.1	Optic atrophy	sense organs											TRUE
377.3	Optic neuritis/neuropathy	sense organs											TRUE
528.12	Oral aphthae	digestive											TRUE
327.41	Organic or persistent insomnia	neurological											TRUE
513.32	Orthopnea	respiratory											TRUE
458.1	Orthostatic hypotension	circulatory system											TRUE
740.1	Osteoarthritis; localized	musculoskeletal											TRUE
740.3	Osteoarthrosis involving more than one site, but not specified as generalized	musculoskeletal											TRUE
740.9	Osteoarthrosis NOS	musculoskeletal											TRUE
740.11	Osteoarthrosis, localized, primary	musculoskeletal											TRUE
740.12	Osteoarthrosis, localized, secondary	musculoskeletal											TRUE
732.7	Osteochondritis dissecans	musculoskeletal											TRUE
732	Osteochondropathies	musculoskeletal											TRUE
710.1	Osteomyelitis	musculoskeletal											TRUE
710	Osteomyelitis, periostitis, and other infections involving bone	musculoskeletal											TRUE
743.9	Osteopenia or other disorder of bone and cartilage	musculoskeletal											TRUE
743.11	Osteoporosis NOS	musculoskeletal											TRUE
736	Other acquired deformities of limbs	musculoskeletal											TRUE
738	Other acquired musculoskeletal deformity	musculoskeletal											TRUE
411.9	Other acute and subacute forms of ischemic heart disease	circulatory system											TRUE
721.8	Other allied disorders of spine	musculoskeletal											TRUE
504	Other alveolar and parietoalveolar pneumonopathy	respiratory											TRUE
795	Other and nonspecific abnormal cytological, histological and immunological findings	symptoms											TRUE
722.9	Other and unspecified disc disorder	musculoskeletal											TRUE
349	Other and unspecified disorders of the nervous system	neurological											TRUE
442	Other aneurysm	circulatory system											TRUE
716	Other arthropathies	musculoskeletal											TRUE
218.2	Other benign neoplasm of uterus	neoplasms											TRUE
426.8	Other cardiac conduction disorders	circulatory system											TRUE
425.8	Other cardiomyopathy	circulatory system											TRUE
598.4	Other cells and casts in urine	genitourinary											TRUE
331	Other cerebral degenerations	neurological											TRUE
411.8	Other chronic ischemic heart disease, unspecified	circulatory system											TRUE
324	Other CNS infection and poliomyelitis	neurological											TRUE
348	Other conditions of brain	neurological											TRUE
348.9	Other conditions of brain, NOS	neurological											TRUE
756	Other congenital musculoskeletal anomalies	congenital anomalies											TRUE
277.6	Other deficiencies of circulating enzymes	endocrine/metabolic											TRUE
281	Other deficiency anemia	hematopoietic											TRUE
341	Other demyelinating diseases of central nervous system	neurological											TRUE
289	Other diseases of blood and blood-forming organs	hematopoietic											TRUE
510	Other diseases of lung	respiratory											TRUE
519.8	Other diseases of respiratory system, NEC	respiratory											TRUE
519	Other diseases of respiratory system, not elsewhere classified	respiratory											TRUE
447	Other disorders of arteries and arterioles	circulatory system											TRUE
575.8	Other disorders of biliary tract	digestive											TRUE
596	Other disorders of bladder	genitourinary											TRUE
733	Other disorders of bone and cartilage	musculoskeletal											TRUE
271.9	Other disorders of carbohydrate transport and metabolism	endocrine/metabolic											TRUE
723	Other disorders of cervical region	musculoskeletal											TRUE
459	Other disorders of circulatory system	circulatory system											TRUE
388	Other disorders of ear	sense organs											TRUE
379	Other disorders of eye	sense organs											TRUE
374	Other disorders of eyelids	sense organs											TRUE
575.7	Other disorders of gallbladder	digestive											TRUE
277.5	Other disorders of lipoid metabolism	endocrine/metabolic											TRUE
277	Other disorders of metabolism	endocrine/metabolic											TRUE
385	Other disorders of middle ear and mastoid	sense organs											TRUE
253.7	Other disorders of neurohypophysis	endocrine/metabolic											TRUE
568	Other disorders of peritoneum	digestive											TRUE
277.2	Other disorders of purine and pyrimidine metabolism	endocrine/metabolic											TRUE
727	Other disorders of synovium, tendon, and bursa	musculoskeletal											TRUE
384	Other disorders of tympanic membrane	sense organs											TRUE
597	Other disorders of urethra and urinary tract	genitourinary											TRUE
414	Other forms of chronic heart disease	circulatory system											TRUE
426.25	Other heart block	circulatory system											TRUE
282.9	Other hereditary hemolytic anemias	hematopoietic											TRUE
401.3	Other hypertensive complications	circulatory system											TRUE
425.12	Other hypertrophic cardiomyopathy	circulatory system											TRUE
136	Other infectious and parasitic diseases	infectious diseases											TRUE
715	Other inflammatory spondylopathies	musculoskeletal											TRUE
560.4	Other intestinal obstruction	digestive											TRUE
686	Other local infections of skin and subcutaneous tissue	dermatologic											TRUE
306	Other mental disorder	mental disorders											TRUE
172.2	Other non-epithelial cancer of skin	neoplasms											TRUE
362.3	Other nondiabetic retinopathy	sense organs											TRUE
613	Other nonmalignant breast conditions	genitourinary											TRUE
263	Other nutritional deficiency	endocrine/metabolic											TRUE
870.3	Other open wound of head and face	injuries & poisonings											TRUE
344	Other paralytic syndromes	neurological											TRUE
290.3	Other persistent mental disorders due to conditions classified elsewhere	mental disorders											TRUE
505	Other pulmonary inflamation or edema	respiratory											TRUE
362	Other retinal disorders	sense organs											TRUE
1004	Other signs and symptoms involving emotional state	NULL											TRUE
610.8	Other specified benign mammary dysplasias	genitourinary											TRUE
427.3	Other specified cardiac dysrhythmias	circulatory system											TRUE
751.22	Other specified congenital anomalies of kidney	congenital anomalies											TRUE
752.2	Other specified congenital anomalies of nervous system	congenital anomalies											TRUE
709.6	Other specified diffuse diseases of connective tissue	dermatologic											TRUE
706.8	Other specified diseases of sebaceous glands	dermatologic											TRUE
527.8	Other specified diseases of the salivary glands	digestive											TRUE
270.38	Other specified disorders of plasma protein metabolism	endocrine/metabolic											TRUE
695.8	Other specified erythematous conditions	dermatologic											TRUE
535.8	Other specified gastritis	digestive											TRUE
842	Other sprains and strains	injuries & poisonings											TRUE
724.8	Other symptoms referable to back	musculoskeletal											TRUE
724.9	Other unspecified back disorders	musculoskeletal											TRUE
452	Other venous embolism and thrombosis	circulatory system											TRUE
281.12	Other vitamin B12 deficiency anemia	hematopoietic											TRUE
380.1	Otitis externa	sense organs											TRUE
381.1	Otitis media	sense organs											TRUE
381.9	Otorrhea	sense organs											TRUE
383	Otosclerosis	sense organs											TRUE
278	Overweight, obesity and other hyperalimentation	endocrine/metabolic											TRUE
379.9	Pain, swelling or discharge of eye	sense organs											TRUE
782.6	Pallor and flushing	symptoms											TRUE
284.1	Pancytopenia	hematopoietic											TRUE
729.3	Panniculitis	musculoskeletal											TRUE
473.3	Paralysis/spasm of vocal cords or larynx	respiratory											TRUE
560.1	Paralytic ileus	digestive											TRUE
378.5	Paralytic strabismus	sense organs											TRUE
295.2	Paranoid disorders	mental disorders											TRUE
270.32	Paraproteinemia	endocrine/metabolic											TRUE
696.2	Parapsoriasis	dermatologic											TRUE
327.5	Parasomnia	neurological											TRUE
332	Parkinson's disease	neurological											TRUE
427.1	Paroxysmal tachycardia, unspecified	circulatory system											TRUE
427.12	Paroxysmal ventricular tachycardia	circulatory system											TRUE
345.12	Partial epilepsy	neurological											TRUE
743.2	Pathologic fracture	musculoskeletal											TRUE
743.22	Pathologic fracture of femur	musculoskeletal											TRUE
742.2	Pathological, developmental or recurrent dislocation	musculoskeletal											TRUE
756.2	Pectus and other congenital anomalies of ribs/sternum	congenital anomalies											TRUE
756.21	Pectus excavatum	congenital anomalies											TRUE
132.1	Pediculosis and phthirus infestation	infectious diseases											TRUE
614.3	Pelvic inflammatory disease (PID)	genitourinary											TRUE
695.22	Pemphigus and pemphigoid	dermatologic											TRUE
531.4	Peptic ulcer, site unspecified	digestive											TRUE
384.4	Perforation of tympanic membrane	sense organs											TRUE
522.5	Periapical abscess	digestive											TRUE
420.2	Pericarditis	circulatory system											TRUE
656.6	Perinatal disorders of digestive system	pregnancy complications											TRUE
337.1	Peripheral autonomic neuropathy	neurological											TRUE
726	Peripheral enthesopathies and allied syndromes	musculoskeletal											TRUE
386.2	Peripheral or central vertigo	sense organs											TRUE
362.6	Peripheral retinal degenerations	sense organs											TRUE
443.9	Peripheral vascular disease, unspecified	circulatory system											TRUE
568.1	Peritoneal adhesions (postoperative) (postinfection)	digestive											TRUE
567	Peritonitis and retroperitoneal infections	digestive											TRUE
281.11	Pernicious anemia	hematopoietic											TRUE
789.1	Persistent vomiting	symptoms											TRUE
301	Personality disorders	mental disorders											TRUE
313	Pervasive developmental disorders	mental disorders											TRUE
270.12	Phenylketonuria [PKU]	endocrine/metabolic											TRUE
451	Phlebitis and thrombophlebitis	circulatory system											TRUE
325	Phlebitis and thrombophlebitis of intracranial venous sinuses	neurological											TRUE
451.2	Phlebitis and thrombophlebitis of lower extremities	circulatory system											TRUE
300.13	Phobia	mental disorders											TRUE
686.3	Pilonidal cyst	dermatologic											TRUE
253.2	Pituitary hypofunction	endocrine/metabolic											TRUE
696.3	Pityriasis	dermatologic											TRUE
480.11	Pneumococcal pneumonia	respiratory											TRUE
480	Pneumonia	respiratory											TRUE
480.3	Pneumonia due to fungus (mycoses)	respiratory											TRUE
501	Pneumonitis due to inhalation of food or vomitus	respiratory											TRUE
975	Poisoning by agents primarily acting on the smooth and skeletal muscles and respiratory system	injuries & poisonings											TRUE
965	Poisoning by analgesics, antipyretics, and antirheumatics	injuries & poisonings											TRUE
960	Poisoning by antibiotics	injuries & poisonings											TRUE
966	Poisoning by anticonvulsants and anti-Parkinsonism drugs	injuries & poisonings											TRUE
962	Poisoning by hormones and synthetic substitutes	injuries & poisonings											TRUE
961	Poisoning by other anti-infectives	injuries & poisonings											TRUE
963	Poisoning by primarily systemic agents	injuries & poisonings											TRUE
969	Poisoning by psychotropic agents	injuries & poisonings											TRUE
446.6	Polyarteritis nodosa	circulatory system											TRUE
200.1	Polycythemia vera	neoplasms											TRUE
289.8	Polycythemia, secondary	hematopoietic											TRUE
276.8	Polydipsia	endocrine/metabolic											TRUE
259.8	Polyglandular activity in multiple endocrine adenomatosis	endocrine/metabolic											TRUE
717	Polymyalgia Rheumatica	musculoskeletal											TRUE
709.4	Polymyositis	dermatologic											TRUE
316.1	Polyneuropathy due to drugs	mental disorders											TRUE
250.6	Polyneuropathy in diabetes	endocrine/metabolic											TRUE
622	Polyp of female genital organs	genitourinary											TRUE
571.81	Portal hypertension	digestive											TRUE
258.1	Postablative ovarian failure	endocrine/metabolic											TRUE
502	Postinflammatory pulmonary fibrosis	respiratory											TRUE
722.8	Postlaminectomy syndrome	musculoskeletal											TRUE
627.3	Postmenopausal atrophic vaginitis	genitourinary											TRUE
475.9	Postnasal drip	respiratory											TRUE
80	Postoperative infection	infectious diseases											TRUE
958.1	Postoperative shock	injuries & poisonings											TRUE
452.8	Postphlebitic syndrome	circulatory system											TRUE
783.1	Postprocedural fever	symptoms											TRUE
876	Posttraumatic wound infection not elsewhere classified	injuries & poisonings											TRUE
259.4	Precocious sexual development and puberty NEC	endocrine/metabolic											TRUE
418.1	Precordial pain	circulatory system											TRUE
427.6	Premature beats	circulatory system											TRUE
627.4	Premenopausal menorrhagia	genitourinary											TRUE
626.4	Premenstrual tension syndromes	genitourinary											TRUE
367.4	Presbyopia	sense organs											TRUE
571.6	Primary biliary cirrhosis	digestive											TRUE
365.11	Primary open angle glaucoma	sense organs											TRUE
415.21	Primary pulmonary hypertension	circulatory system											TRUE
287.31	Primary thrombocytopenia	hematopoietic											TRUE
425.1	Primary/intrinsic cardiomyopathies	circulatory system											TRUE
618.1	Prolapse of vaginal walls	genitourinary											TRUE
580.11	Proliferative glomerulonephritis	genitourinary											TRUE
260	Protein-calorie malnutrition	endocrine/metabolic											TRUE
269	Proteinuria	endocrine/metabolic											TRUE
131	Protozoan infection	infectious diseases											TRUE
695.7	Prurigo and Lichen	dermatologic											TRUE
480.12	Pseudomonal pneumonia	respiratory											TRUE
696.4	Psoriasis	dermatologic											TRUE
696.41	Psoriasis vulgaris	dermatologic											TRUE
696.42	Psoriatic arthropathy	dermatologic											TRUE
303.3	Psychogenic disorder	mental disorders											TRUE
368.91	Psychophysical visual disturbances	sense organs											TRUE
295.3	Psychosis	mental disorders											TRUE
374.3	Ptosis of eyelid	sense organs											TRUE
508	Pulmonary collapse; interstitial and compensatory emphysema	respiratory											TRUE
503	Pulmonary congestion and hypostasis	respiratory											TRUE
415.11	Pulmonary embolism and infarction, acute	circulatory system											TRUE
415	Pulmonary heart disease	circulatory system											TRUE
509.3	Pulmonary insufficiency or respiratory failure following trauma and surgery	respiratory											TRUE
287	Purpura and other hemorrhagic conditions	hematopoietic											TRUE
686.5	Pyoderma	dermatologic											TRUE
711.1	Pyogenic arthritis	musculoskeletal											TRUE
686.4	Pyogenic granuloma	dermatologic											TRUE
287.4	Qualitative platelet defects	hematopoietic											TRUE
443.1	Raynaud's syndrome	circulatory system											TRUE
530.14	Reflux esophagitis	digestive											TRUE
555.1	Regional enteritis	digestive											TRUE
711.2	Reiter's disease	musculoskeletal											TRUE
594.8	Renal colic	genitourinary											TRUE
585.31	Renal dialysis	genitourinary											TRUE
585.2	Renal failure NOS	genitourinary											TRUE
588.1	Renal osteodystrophy	genitourinary											TRUE
580.4	Renal sclerosis, NOS	genitourinary											TRUE
513	Respiratory abnormalities	respiratory											TRUE
519.2	Respiratory complications	respiratory											TRUE
656.2	Respiratory conditions of fetus and newborn	pregnancy complications											TRUE
509.1	Respiratory failure	respiratory											TRUE
509	Respiratory failure, insufficiency, arrest	respiratory											TRUE
509.2	Respiratory insufficiency	respiratory											TRUE
327.71	Restless legs syndrome	neurological											TRUE
202.22	Reticulosarcoma	neoplasms											TRUE
361.1	Retinal detachment with retinal defect	sense organs											TRUE
361	Retinal detachments and defects	sense organs											TRUE
362.9	Retinal edema	sense organs											TRUE
362.8	Retinal hemorrhage/ischemia	sense organs											TRUE
362.4	Retinal vascular changes and abnomalities	sense organs											TRUE
362.1	Retinopathy of prematurity	sense organs											TRUE
361.2	Retinoschisis and retinal cysts	sense organs											TRUE
772.4	Rhabdomyolysis	symptoms											TRUE
394	Rheumatic disease of the heart valves	circulatory system											TRUE
729.1	Rheumatism, unspecified and fibrositis	musculoskeletal											TRUE
714.1	Rheumatoid arthritis	musculoskeletal											TRUE
714	Rheumatoid arthritis and other inflammatory polyarthropathies	musculoskeletal											TRUE
426.31	Right bundle branch block	circulatory system											TRUE
840.2	Rotator cuff (capsule) sprain	injuries & poisonings											TRUE
727.5	Rupture of synovium	musculoskeletal											TRUE
727.6	Rupture of tendon, nontraumatic	musculoskeletal											TRUE
715.1	Sacroiliitis NEC	musculoskeletal											TRUE
697	Sarcoidosis	dermatologic											TRUE
295.1	Schizophrenia	mental disorders											TRUE
722.3	Schmorl's nodes	musculoskeletal											TRUE
379.1	Scleritis and episcleritis	sense organs											TRUE
706.3	Seborrhea	dermatologic											TRUE
426.23	Second degree AV block	circulatory system											TRUE
249	Secondary diabetes mellitus	endocrine/metabolic											TRUE
588.2	Secondary hyperparathyroidism (of renal origin)	genitourinary											TRUE
244.1	Secondary hypothyroidism	endocrine/metabolic											TRUE
198.6	Secondary malignancy of bone	neoplasms											TRUE
198.5	Secondary malignancy of brain/spine	neoplasms											TRUE
198.1	Secondary malignancy of lymph nodes	neoplasms											TRUE
198.2	Secondary malignancy of respiratory organs	neoplasms											TRUE
198	Secondary malignant neoplasm	neoplasms											TRUE
198.7	Secondary malignant neoplasm of skin	neoplasms											TRUE
425.2	Secondary/extrinsic cardiomyopathies	circulatory system											TRUE
366.2	Senile cataract	sense organs											TRUE
362.31	Separation of retinal layers	sense organs											TRUE
994.2	Sepsis	injuries & poisonings											TRUE
470	Septal Deviations/Turbinate Hypertrophy	respiratory											TRUE
994.21	Septic shock	injuries & poisonings											TRUE
38	Septicemia	infectious diseases											TRUE
260.2	severe protein-calorie malnutrition	endocrine/metabolic											TRUE
302	Sexual and gender identity disorders	mental disorders											TRUE
797	Shock	symptoms											TRUE
637	Short gestation; low birth weight; and fetal growth retardation	pregnancy complications											TRUE
264.1	Short stature	endocrine/metabolic											TRUE
527.2	Sialoadenitis	digestive											TRUE
528.7	Sialolithiasis	digestive											TRUE
709.2	Sicca syndrome	dermatologic											TRUE
282.5	Sickle cell anemia	hematopoietic											TRUE
240	Simple and unspecified goiter	endocrine/metabolic											TRUE
427.8	Sinoatrial node dysfunction (Bradycardia)	circulatory system											TRUE
819	Skull and face fracture and other intercranial injury	injuries & poisonings											TRUE
327.3	Sleep apnea	neurological											TRUE
327.7	Sleep related movement disorders	neurological											TRUE
514.2	Solitary pulmonary nodule	respiratory											TRUE
303.4	Somatoform disorder	mental disorders											TRUE
772.2	Spasm of muscle	symptoms											TRUE
291.4	Specific nonpsychotic mental disorders due to brain damage	mental disorders											TRUE
315.2	Speech and language disorder	mental disorders											TRUE
752.11	Spina bifida	congenital anomalies											TRUE
952	Spinal cord injury without evidence of spinal bone injury	injuries & poisonings											TRUE
720	Spinal stenosis	musculoskeletal											TRUE
720.1	Spinal stenosis of lumbar region	musculoskeletal											TRUE
334.1	Spinocerebellar disease	neurological											TRUE
130	Spirochetal infection	infectious diseases											TRUE
579.2	Splenomegaly	digestive											TRUE
721.2	Spondylosis with myelopathy	musculoskeletal											TRUE
721.1	Spondylosis without myelopathy	musculoskeletal											TRUE
287.1	Spontaneous ecchymoses	hematopoietic											TRUE
841	Sprains and strains of back and neck	injuries & poisonings											TRUE
172.22	Squamous cell carcinoma	neoplasms											TRUE
41.1	Staphylococcus infections	infectious diseases											TRUE
741.2	Stiffness of joint	musculoskeletal											TRUE
528.1	Stomatitis and mucositis	digestive											TRUE
528.11	Stomatitis and mucositis (ulcerative)	digestive											TRUE
378.1	Strabismus (not specified as paralytic)	sense organs											TRUE
378	Strabismus and other disorders of binocular eye movements	sense organs											TRUE
743.4	Stress fracture	musculoskeletal											TRUE
530.3	Stricture and stenosis of esophagus	digestive											TRUE
447.1	Stricture of artery	circulatory system											TRUE
586.4	Stricture/obstruction of ureter	genitourinary											TRUE
430.1	Subarachnoid hemorrhage	circulatory system											TRUE
430.3	Subdural hemorrhage	circulatory system											TRUE
368.9	Subjective visual disturbances	sense organs											TRUE
1003	Sudden death	NULL											TRUE
297.1	Suicidal ideation	mental disorders											TRUE
297	Suicidal ideation or attempt	mental disorders											TRUE
297.2	Suicide or self-inflicted injury	mental disorders											TRUE
370.2	Superficial keratitis	sense organs											TRUE
381.11	Suppurative and unspecified otitis media	sense organs											TRUE
427.61	Supraventricular premature beats	circulatory system											TRUE
292.12	Symbolic dysfunction	mental disorders											TRUE
627.2	Symptomatic menopause	genitourinary											TRUE
687	Symptoms affecting skin	dermatologic											TRUE
429.3	Symptoms involving cardiovascular system	circulatory system											TRUE
293	Symptoms involving head and neck	mental disorders											TRUE
781	Symptoms involving nervous and musculoskeletal systems	symptoms											TRUE
519.9	Symptoms involving respiratory system and other chest symptoms	respiratory											TRUE
726.2	Synoviopathy	musculoskeletal											TRUE
994.1	Systemic inflammatory response syndrome (SIRS)	injuries & poisonings											TRUE
709.3	Systemic sclerosis	dermatologic											TRUE
446.7	Takayasu's disease	circulatory system											TRUE
704.12	Telogen effluvium	dermatologic											TRUE
526.41	Temporomandibular joint disorder, unspecified	digestive											TRUE
526.4	Temporomandibular joint disorders	digestive											TRUE
306.9	Tension headache	mental disorders											TRUE
257.1	Testicular hypofunction	endocrine/metabolic											TRUE
478	Throat pain	respiratory											TRUE
446.8	Thrombotic microangiopathy	circulatory system											TRUE
193	Thyroid cancer	neoplasms											TRUE
246.2	Thyroid cyst	endocrine/metabolic											TRUE
245	Thyroiditis	endocrine/metabolic											TRUE
245.1	Thyroiditis, acute and subacute	endocrine/metabolic											TRUE
242.31	Thyrotoxic exophthalmos	endocrine/metabolic											TRUE
389.4	Tinnitus	sense organs											TRUE
521.4	Tooth complications likely association with other diseases	digestive											TRUE
333.4	Torsion dystonia	neurological											TRUE
723.1	Torticollis	musculoskeletal											TRUE
981	Toxic effect of (non-ethyl) alcohol and petroleum and other solvents	injuries & poisonings											TRUE
986	Toxic effect of carbon monoxide	injuries & poisonings											TRUE
983	Toxic effect of corrosive aromatics, acids, and caustic alkalis	injuries & poisonings											TRUE
987	Toxic effect of other gases, fumes, or vapors	injuries & poisonings											TRUE
985	Toxic effect of other metals	injuries & poisonings											TRUE
989	Toxic effect of other substances, chiefly nonmedicinal as to source	injuries & poisonings											TRUE
913	Toxic effect of venom	injuries & poisonings											TRUE
695.1	Toxic erythema	dermatologic											TRUE
569.1	Toxic gastroenteritis and colitis	digestive											TRUE
362.5	Toxic maculopathy of retina	sense organs											TRUE
242.2	Toxic multinodular goiter	endocrine/metabolic											TRUE
519.1	Tracheostomy complications	respiratory											TRUE
292.5	Transient alteration of awareness	mental disorders											TRUE
433.31	Transient cerebral ischemia	circulatory system											TRUE
291.1	Transient mental disorders due to conditions classified elsewhere	mental disorders											TRUE
872	Traumatic amputation	injuries & poisonings											TRUE
958.2	Traumatic and surgical subcutaneous emphysema	injuries & poisonings											TRUE
352.1	Trigeminal nerve disorders [CN5]	neurological											TRUE
10	Tuberculosis	infectious diseases											TRUE
385.5	Tympanosclerosis and middle ear disease related to otitis media	sense organs											TRUE
250.1	Type 1 diabetes	endocrine/metabolic											TRUE
250.11	Type 1 diabetes with ketoacidosis	endocrine/metabolic											TRUE
250.14	Type 1 diabetes with neurological manifestations	endocrine/metabolic											TRUE
250.13	Type 1 diabetes with ophthalmic manifestations	endocrine/metabolic											TRUE
250.12	Type 1 diabetes with renal manifestations	endocrine/metabolic											TRUE
250.21	Type 2 diabetes with ketoacidosis	endocrine/metabolic											TRUE
250.24	Type 2 diabetes with neurological manifestations	endocrine/metabolic											TRUE
250.23	Type 2 diabetes with ophthalmic manifestations	endocrine/metabolic											TRUE
250.22	Type 2 diabetes with renal manifestations	endocrine/metabolic											TRUE
530.12	Ulcer of esophagus	digestive											TRUE
556.1	Ulceration of intestine	digestive											TRUE
556	Ulceration of the lower GI tract	digestive											TRUE
555.2	Ulcerative colitis	digestive											TRUE
555.21	Ulcerative colitis (chronic)	digestive											TRUE
550.4	Umbilical hernia	digestive											TRUE
736.6	Unequal leg length (acquired)	musculoskeletal											TRUE
272.9	Unspecified disorder of lipoid metabolism	endocrine/metabolic											TRUE
695.9	Unspecified erythematous condition	dermatologic											TRUE
716.2	Unspecified monoarthritis	musculoskeletal											TRUE
710.19	Unspecified osteomyelitis	musculoskeletal											TRUE
750.1	Upper gastrointestinal congenital anomalies	congenital anomalies											TRUE
597.8	Urethral hypermobility/ISD	genitourinary											TRUE
597.1	Urethral stricture (not specified as infectious)	genitourinary											TRUE
592.21	Urethral syndrome	genitourinary											TRUE
592.2	Urethritis and urethral syndrome	genitourinary											TRUE
594	Urinary calculus	genitourinary											TRUE
597.2	Urinary complications NEC	genitourinary											TRUE
599.1	Urinary obstruction	genitourinary											TRUE
618.2	Uterine/Uterovaginal prolapse	genitourinary											TRUE
371.1	Uveitis, noninfectious or NOS	sense organs											TRUE
747.12	Valvular heart disease/ heart chambers	congenital anomalies											TRUE
79.1	Varicella infection	infectious diseases											TRUE
454	Varicose veins	circulatory system											TRUE
454.1	Varicose veins of lower extremity	circulatory system											TRUE
454.11	Varicose veins of lower extremity, symptomtic	circulatory system											TRUE
856	Vascular complications of surgery and medical procedures	injuries & poisonings											TRUE
586.3	Vascular disorders of kidney/hypertrophy	genitourinary											TRUE
694.3	Vascular disorders of skin	dermatologic											TRUE
217	Vascular hamartomas and non-neoplastic nevi	neoplasms											TRUE
441	Vascular insufficiency of intestine	circulatory system											TRUE
90.3	Venereal diseases due to Chlamydia trachomatis	infectious diseases											TRUE
550.5	Ventral hernia	digestive											TRUE
427.41	Ventricular fibrillation and flutter	circulatory system											TRUE
386	Vertiginous syndromes and other disorders of vestibular system	sense organs											TRUE
586.12	Vesicoureteral reflux	genitourinary											TRUE
8.6	Viral Enteritis	infectious diseases											TRUE
70	Viral hepatitis	infectious diseases											TRUE
70.1	Viral hepatitis A	infectious diseases											TRUE
70.2	Viral hepatitis B	infectious diseases											TRUE
70.3	Viral hepatitis C	infectious diseases											TRUE
480.2	Viral pneumonia	respiratory											TRUE
79.9	Viremia, NOS	infectious diseases											TRUE
368.4	Visual field defects	sense organs											TRUE
261.2	Vitamin B-complex deficiencies	endocrine/metabolic											TRUE
261	Vitamin deficiency	endocrine/metabolic											TRUE
694.1	Vitiligo	dermatologic											TRUE
473.4	Voice disturbance	respiratory											TRUE
286.11	Von willebrand's disease	hematopoietic											TRUE
446.4	Wegener's granulomatosis	circulatory system											TRUE
512.1	Wheezing	respiratory											TRUE

## Sheet: UCSF 35+ results
phecode	phenotype	category	rpl_count	control_count	rpl_prop	control_prop	odds_ratio_crude	p_value_crude	adj_p_value_crude	odds_ratio_w_age_re	p_value_w_age_re	adj_p_value_w_age_re	count_under10
785	Abdominal pain	symptoms	429	1119	0.175892	0.179126	0.978091	0.723376	0.975999	1.00494	0.938992	0.999999	FALSE
426.7	Abnormal electrocardiogram [ECG] [EKG]	circulatory system	40	149	0.0164002	0.0238514	0.682387	0.03345	0.338092	0.67712	0.0346996	0.3438	FALSE
514	Abnormal findings examination of lungs	respiratory	19	99	0.00779008	0.0158476	0.48757	0.00430529	0.0682503	0.446524	0.00164996	0.0282367	FALSE
701.5	Abnormal granulation tissue	dermatologic	11	64	0.00451005	0.0102449	0.437687	0.0115811	0.146565	0.53641	0.0599044	0.492984	FALSE
396	Abnormal heart sounds	circulatory system	20	60	0.00820008	0.00960461	0.852556	0.538451	0.975999	0.886214	0.649619	0.999999	FALSE
350.1	Abnormal involuntary movements	neurological	22	56	0.00902009	0.0089643	1.00628	0.98024	0.983505	0.983023	0.947481	0.999999	FALSE
611.1	Abnormal mammogram	genitourinary	40	72	0.0164002	0.0115255	1.42999	0.071802	0.517387	1.11473	0.595952	0.999999	FALSE
792	Abnormal Papanicolaou smear of cervix and cervical HPV	genitourinary	59	150	0.0241902	0.0240115	1.00763	0.961043	0.983505	1.03888	0.810548	0.999999	FALSE
246.7	Abnormal results of function study of thyroid	endocrine/metabolic	31	50	0.0127101	0.00800384	1.59557	0.0420826	0.403671	1.53153	0.0713447	0.533731	FALSE
655.1	Abnormality in fetal heart rate or rhythm	pregnancy complications	229	2356	0.0938909	0.377141	0.171131	2.8058e-125	8.45107e-123	0.172991	3.00328e-120	9.04589e-118	FALSE
654.1	Abnormality of organs and soft tissues of pelvis complicating pregnancy, childbirth, or the puerperium	pregnancy complications	240	1358	0.098401	0.217384	0.392922	5.43404e-36	3.27347e-34	0.366787	2.1955e-39	1.43758e-37	FALSE
626.11	Absent or infrequent menstruation	genitourinary	357	654	0.146371	0.10469	1.46641	5.97184e-08	1.72954e-06	1.54667	2.21251e-09	7.08945e-08	FALSE
706.1	Acne	dermatologic	73	199	0.0299303	0.0318553	0.937706	0.643483	0.975999	1.02381	0.868691	0.999999	FALSE
244.2	Acquired hypothyroidism	endocrine/metabolic	85	186	0.0348503	0.0297743	1.17664	0.221863	0.90549	1.12029	0.406871	0.999999	FALSE
702.1	Actinic keratosis	dermatologic	12	26	0.00492005	0.004162	1.18304	0.63087	0.975999	0.908523	0.790147	0.999999	FALSE
483	Acute bronchitis and bronchiolitis	respiratory	12	36	0.00492005	0.00576277	0.853042	0.634349	0.975999	0.78236	0.474823	0.999999	FALSE
592.11	Acute cystitis	genitourinary	26	61	0.0106601	0.00976469	1.09269	0.706551	0.975999	1.06597	0.792362	0.999999	FALSE
338.1	Acute pain	neurological	85	241	0.0348503	0.0385785	0.899872	0.41153	0.975999	0.849888	0.21964	0.92234	FALSE
465.2	Acute pharyngitis	respiratory	95	175	0.0389504	0.0280134	1.40624	0.00859488	0.119851	1.39859	0.0121442	0.159037	FALSE
285.1	Acute posthemorrhagic anemia	hematopoietic	30	217	0.0123001	0.0347367	0.346053	6.4216e-08	1.8247e-06	0.357454	2.27901e-07	6.24033e-06	FALSE
300.8	Acute reaction to stress	mental disorders	14	39	0.00574006	0.006243	0.918974	0.786846	0.975999	0.874092	0.674973	0.999999	FALSE
585.1	Acute renal failure	genitourinary	12	66	0.00492005	0.0105651	0.463048	0.0144349	0.171173	0.435695	0.00962523	0.130591	FALSE
464	Acute sinusitis	respiratory	41	69	0.0168102	0.0110453	1.53085	0.0320655	0.326288	1.54541	0.0331778	0.335604	FALSE
465	Acute upper respiratory infections of multiple or unspecified sites	respiratory	108	318	0.0442804	0.0509044	0.863845	0.199281	0.855035	0.830991	0.11353	0.692213	FALSE
304	Adjustment reaction	mental disorders	120	307	0.0492005	0.0491436	1.00122	0.991205	0.992523	0.978221	0.846012	0.999999	FALSE
300.12	Agorophobia, social phobia, and panic disorder	mental disorders	27	122	0.0110701	0.0195294	0.561995	0.00709499	0.100802	0.560548	0.00788875	0.110974	FALSE
476	Allergic rhinitis	respiratory	106	238	0.0434604	0.0380983	1.14714	0.249849	0.926779	1.12351	0.341908	0.999999	FALSE
949	Allergies, other	injuries & poisonings	31	96	0.0127101	0.0153674	0.824859	0.354545	0.975999	0.808831	0.318108	0.999999	FALSE
704.1	Alopecia	dermatologic	33	96	0.0135301	0.0153674	0.878806	0.524954	0.975999	0.872877	0.514851	0.999999	FALSE
110.12	Althete's foot	infectious diseases	17	39	0.00697007	0.006243	1.11728	0.703732	0.975999	1.26805	0.425493	0.999999	FALSE
565	Anal and rectal conditions	digestive	24	91	0.0098401	0.014567	0.672282	0.0852453	0.560609	0.698994	0.127657	0.733782	FALSE
644	Anemia during pregnancy	pregnancy complications	149	1289	0.0610906	0.206339	0.250267	2.68576e-53	2.24708e-51	0.250707	1.64844e-51	1.65504e-49	FALSE
635.2	Antepartum hemorrhage, abruptio placentae, and placenta previa	pregnancy complications	284	988	0.116441	0.158156	0.701483	8.53228e-07	2.25432e-05	0.700371	1.36644e-06	3.42977e-05	FALSE
300.1	Anxiety disorder	mental disorders	260	948	0.106601	0.151753	0.666963	5.40913e-08	1.59729e-06	0.653712	2.71615e-08	8.18103e-07	FALSE
513.31	Apnea	respiratory	10	11	0.00410004	0.00176085	2.33392	0.0527605	0.454042	2.10463	0.103738	0.661989	FALSE
427.5	Arrhythmia (cardiac) NOS	circulatory system	28	105	0.0114801	0.0168081	0.679331	0.0708599	0.517387	0.640257	0.0422089	0.410108	FALSE
495	Asthma	respiratory	126	586	0.0516605	0.093805	0.526248	2.29108e-10	7.84173e-09	0.508578	7.2857e-11	2.55169e-09	FALSE
495.2	Asthma with exacerbation	respiratory	26	67	0.0106601	0.0107251	0.99387	0.978884	0.983505	0.962284	0.872215	0.999999	FALSE
367.2	Astigmatism	sense organs	26	67	0.0106601	0.0107251	0.99387	0.978884	0.983505	1.0109	0.963767	0.999999	FALSE
939	Atopic/contact dermatitis due to other or unspecified	dermatologic	149	448	0.0610906	0.0717144	0.842221	0.0789386	0.537925	0.834368	0.0716241	0.533731	FALSE
535.2	Atrophic gastritis	digestive	15	22	0.00615006	0.00352169	1.75096	0.0951888	0.610018	1.62751	0.160667	0.820143	FALSE
313.1	Attention deficit hyperactivity disorder	mental disorders	15	62	0.00615006	0.00992476	0.617315	0.094794	0.610018	0.630473	0.116635	0.705434	FALSE
760	Back pain	symptoms	193	605	0.0791308	0.0968465	0.801356	0.0103324	0.135309	0.798706	0.0112435	0.148532	FALSE
41	Bacterial infection NOS	infectious diseases	51	103	0.0209102	0.0164879	1.27394	0.161441	0.792031	1.22233	0.261974	0.96753	FALSE
610.4	Benign neoplasm of breast	genitourinary	16	38	0.00656007	0.00608292	1.07896	0.799354	0.975999	1.10162	0.753192	0.999999	FALSE
208	Benign neoplasm of colon	neoplasms	14	12	0.00574006	0.00192092	2.99966	0.0053169	0.0785024	2.93466	0.00736788	0.105676	FALSE
220	Benign neoplasm of ovary	neoplasms	10	48	0.00410004	0.00768369	0.531683	0.0698334	0.514224	0.493853	0.0469389	0.437898	FALSE
227.3	Benign neoplasm of pituitary gland and craniopharyngeal duct (pouch)	neoplasms	10	22	0.00410004	0.00352169	1.1649	0.689576	0.975999	1.37816	0.411105	0.999999	FALSE
216	Benign neoplasm of skin	neoplasms	229	669	0.0938909	0.107091	0.863964	0.0695824	0.514224	0.850527	0.0524269	0.45727	FALSE
296.1	Bipolar	mental disorders	19	50	0.00779008	0.00800384	0.973083	0.919671	0.975999	0.961594	0.887649	0.999999	FALSE
367.9	Blindness and low vision	sense organs	10	12	0.00410004	0.00192092	2.13908	0.076213	0.534577	2.22171	0.0708555	0.533731	FALSE
578.2	Blood in stool	digestive	11	37	0.00451005	0.00592284	0.760386	0.426191	0.975999	0.799212	0.523519	0.999999	FALSE
497	Bronchitis	respiratory	21	42	0.00861009	0.00672323	1.28309	0.352918	0.975999	1.14625	0.619244	0.999999	FALSE
594.1	Calculus of kidney	genitourinary	18	28	0.00738007	0.00448215	1.65135	0.0979004	0.614901	1.57911	0.145095	0.77797	FALSE
112	Candidiasis	infectious diseases	92	267	0.0377204	0.0427405	0.87794	0.291153	0.975999	0.86237	0.241731	0.950515	FALSE
686.1	Carbuncle and furuncle	dermatologic	20	96	0.00820008	0.0153674	0.529747	0.0100928	0.134511	0.527087	0.0112208	0.148532	FALSE
636.8	Cervical incompetence	pregnancy complications	69	80	0.0282903	0.0128061	2.24432	1.12703e-06	2.8768e-05	2.10706	1.36172e-05	0.000315501	FALSE
180.3	Cervical intraepithelial neoplasia [CIN] [Cervical dysplasia]	neoplasms	43	148	0.0176302	0.0236914	0.739569	0.0845619	0.558554	0.740128	0.0927865	0.623824	FALSE
765	Cervical radiculitis	symptoms	22	32	0.00902009	0.00512246	1.76782	0.0404126	0.392654	1.52669	0.142408	0.774248	FALSE
761	Cervicalgia	symptoms	75	184	0.0307503	0.0294541	1.0454	0.749613	0.975999	0.96831	0.82207	0.999999	FALSE
614.51	Cervicitis and endocervicitis	genitourinary	34	110	0.0139401	0.0176085	0.788728	0.229932	0.915682	0.769017	0.193917	0.874542	FALSE
574.1	Cholelithiasis	digestive	13	37	0.00533005	0.00592284	0.899378	0.742891	0.975999	0.839928	0.601097	0.999999	FALSE
758.1	Chromosomal anomalies	congenital anomalies	33	47	0.0135301	0.00752361	1.80931	0.0094227	0.127843	1.77769	0.0139259	0.17477	FALSE
938.2	Chronic dermatitis due to solar radiation	dermatologic	14	26	0.00574006	0.004162	1.38135	0.331042	0.975999	1.39361	0.331607	0.999999	FALSE
614.32	Chronic inflammatory pelvic disease	genitourinary	11	27	0.00451005	0.00432207	1.04369	0.905055	0.975999	0.883243	0.734854	0.999999	FALSE
245.21	Chronic lymphocytic thyroiditis	endocrine/metabolic	62	100	0.0254203	0.0160077	1.60334	0.00387124	0.0626891	1.51534	0.0137957	0.174591	FALSE
338.2	Chronic pain	neurological	90	212	0.0369004	0.0339363	1.09069	0.49811	0.975999	1.0282	0.833505	0.999999	FALSE
472	Chronic pharyngitis and nasopharyngitis	respiratory	24	61	0.0098401	0.00976469	1.0078	0.974404	0.983505	0.9622	0.876606	0.999999	FALSE
475	Chronic sinusitis	respiratory	33	96	0.0135301	0.0153674	0.878806	0.524954	0.975999	0.884453	0.554602	0.999999	FALSE
474.2	Chronic tonsillitis and adenoiditis	respiratory	16	21	0.00656007	0.00336161	1.95775	0.0434675	0.409137	2.25685	0.0165269	0.19445	FALSE
286.3	Coagulation defects complicating pregnancy or postpartum	hematopoietic	84	437	0.0344403	0.0699536	0.474223	8.52565e-10	2.85325e-08	0.469535	1.06204e-09	3.47702e-08	FALSE
669	Complications of labor and delivery NEC	pregnancy complications	196	1386	0.0803608	0.221866	0.306471	6.73797e-49	5.34073e-47	0.298093	2.3656e-49	2.09564e-47	FALSE
1011	Complications of surgical and medical procedures	NULL	42	141	0.0172202	0.0225708	0.758785	0.119775	0.697678	0.706974	0.056107	0.477385	FALSE
751.11	Congenital anomalies of female genital organs	congenital anomalies	190	114	0.0779008	0.0182488	4.54498	6.43217e-36	3.72571e-34	4.29394	9.18639e-32	5.12396e-30	FALSE
369.5	Conjunctivitis, infectious	sense organs	29	66	0.0118901	0.0105651	1.12693	0.593846	0.975999	1.04448	0.84989	0.999999	FALSE
563	Constipation	digestive	88	369	0.0360804	0.0590684	0.596257	1.96068e-05	0.000440715	0.595209	2.75143e-05	0.000618455	FALSE
916	Contusion	injuries & poisonings	28	69	0.0114801	0.0110453	1.03982	0.862424	0.975999	0.957362	0.8496	0.999999	FALSE
411.4	Coronary atherosclerosis	circulatory system	11	75	0.00451005	0.0120058	0.372828	0.0023075	0.0399436	0.352131	0.00148841	0.0257649	FALSE
512.8	Cough	respiratory	157	328	0.0643706	0.0525052	1.24153	0.0307157	0.316835	1.21181	0.0632673	0.501477	FALSE
610.1	Cystic mastopathy	genitourinary	21	64	0.00861009	0.0102449	0.839039	0.487245	0.975999	0.835639	0.48729	0.999999	FALSE
452.2	Deep vein thrombosis [DVT]	circulatory system	12	30	0.00492005	0.00480231	1.02464	0.943327	0.975999	1.07714	0.832406	0.999999	FALSE
722.6	Degeneration of intervertebral disc	musculoskeletal	20	48	0.00820008	0.00768369	1.06776	0.80618	0.975999	0.940152	0.822331	0.999999	FALSE
296.2	Depression	mental disorders	61	199	0.0250103	0.0318553	0.779609	0.0932805	0.60292	0.712548	0.0261412	0.277244	FALSE
110.2	Dermatomycoses	infectious diseases	11	46	0.00451005	0.00736353	0.610728	0.142795	0.7387	0.572454	0.103382	0.661989	FALSE
110.11	Dermatophytosis of nail	infectious diseases	20	44	0.00820008	0.00704338	1.16558	0.571442	0.975999	1.18064	0.552059	0.999999	FALSE
649.1	Diabetes or abnormal glucose tolerance complicating pregnancy	pregnancy complications	245	1507	0.100451	0.241236	0.351232	6.62487e-46	4.98853e-44	0.330017	1.2173e-48	9.64867e-47	FALSE
550.2	Diaphragmatic hernia	digestive	13	20	0.00533005	0.00320154	1.6684	0.151704	0.772958	1.34738	0.417182	0.999999	FALSE
561.1	Diarrhea	digestive	76	196	0.0311603	0.0313751	0.992935	0.958815	0.983505	0.999514	0.997252	0.999999	FALSE
704	Diseases of hair and hair follicles	dermatologic	19	45	0.00779008	0.00720346	1.08208	0.773949	0.975999	1.06355	0.827606	0.999999	FALSE
528.5	Diseases of lips	digestive	14	15	0.00574006	0.00240115	2.39857	0.0188038	0.216171	2.76403	0.00770463	0.109464	FALSE
703	Diseases of nail, NOS	dermatologic	19	46	0.00779008	0.00736353	1.05838	0.835804	0.975999	1.0157	0.956253	0.999999	FALSE
830	Dislocation	injuries & poisonings	16	39	0.00656007	0.006243	1.05112	0.867057	0.975999	1.06875	0.826824	0.999999	FALSE
689	Disorder of skin and subcutaneous tissue NOS	dermatologic	51	151	0.0209102	0.0241716	0.862192	0.365186	0.975999	0.808636	0.206463	0.897702	FALSE
626	Disorders of menstruation and other abnormal bleeding from female genital tract	genitourinary	169	271	0.0692907	0.0433808	1.64173	9.34028e-07	2.42525e-05	1.68947	4.9066e-07	1.29637e-05	FALSE
728	Disorders of muscle, ligament, and fascia	musculoskeletal	16	66	0.00656007	0.0105651	0.618417	0.0857402	0.561412	0.633094	0.108187	0.671687	FALSE
619.2	Disorders of uterus, NEC	genitourinary	226	287	0.0926609	0.0459421	2.12076	3.9405e-16	1.56168e-14	2.01219	1.90589e-13	7.35969e-12	FALSE
379.2	Disorders of vitreous body	sense organs	12	24	0.00492005	0.00384184	1.28204	0.483231	0.975999	1.19786	0.620988	0.999999	FALSE
617	Disorders secondary to childbirth, surgery, trauma	genitourinary	309	427	0.126691	0.0683528	1.97731	5.40474e-18	2.26098e-16	2.02385	4.38539e-18	2.06387e-16	FALSE
722.1	Displacement of intervertebral disc	musculoskeletal	20	55	0.00820008	0.00880423	0.930813	0.784524	0.975999	0.972102	0.91608	0.999999	FALSE
687.4	Disturbance of skin sensation	dermatologic	83	213	0.0340303	0.0340964	0.997995	0.987839	0.989811	0.955839	0.738902	0.999999	FALSE
270.11	Disturbances of sulphur-bearing amino-acid metabolism	endocrine/metabolic	15	19	0.00615006	0.00304146	2.0284	0.0410779	0.39656	1.89368	0.0745981	0.545363	FALSE
386.9	Dizziness and giddiness (Light-headedness and vertigo)	sense organs	85	206	0.0348503	0.0329758	1.0589	0.662659	0.975999	1.03765	0.784732	0.999999	FALSE
375.1	Dry eyes	sense organs	20	32	0.00820008	0.00512246	1.60578	0.0977856	0.614901	1.53764	0.145232	0.77797	FALSE
626.2	Dysmenorrhea	genitourinary	52	87	0.0213202	0.0139267	1.54245	0.0143121	0.171063	1.56292	0.0142668	0.177569	FALSE
277.7	Dysmetabolic syndrome X	endocrine/metabolic	50	16	0.0205002	0.00256123	8.15064	3.3596e-13	1.23404e-11	8.10943	1.08728e-12	3.99378e-11	FALSE
625.1	Dyspareunia	genitourinary	47	151	0.0192702	0.0241716	0.79324	0.169906	0.811795	0.828118	0.274787	0.981264	FALSE
536.8	Dyspepsia and other specified disorders of function of stomach	digestive	17	29	0.00697007	0.00464223	1.50497	0.182165	0.811795	1.29102	0.420662	0.999999	FALSE
532	Dysphagia	digestive	16	36	0.00656007	0.00576277	1.13927	0.665323	0.975999	1.03792	0.904832	0.999999	FALSE
300.4	Dysthymic disorder	mental disorders	30	82	0.0123001	0.0131263	0.936276	0.759107	0.975999	0.936854	0.766732	0.999999	FALSE
599.3	Dysuria	genitourinary	139	373	0.0569906	0.0597087	0.951726	0.628876	0.975999	0.961802	0.711684	0.999999	FALSE
636.2	Early onset of delivery	pregnancy complications	44	126	0.0180402	0.0201697	0.892481	0.519885	0.975999	0.828334	0.29897	0.995609	FALSE
636	Early or threatened labor; hemorrhage in early pregnancy	pregnancy complications	308	648	0.126281	0.10373	1.24883	0.00258422	0.0432426	1.34206	0.000104997	0.00219718	FALSE
782.3	Edema	symptoms	26	126	0.0106601	0.0201697	0.523441	0.00282023	0.0466733	0.493293	0.0013482	0.0238429	FALSE
1015	Effects of other external causes	NULL	12	31	0.00492005	0.00496238	0.991427	0.979846	0.983505	0.875626	0.704417	0.999999	FALSE
288.2	Elevated white blood cell count	hematopoietic	15	73	0.00615006	0.0116856	0.523362	0.0228542	0.252276	0.453309	0.00694282	0.101513	FALSE
615	Endometriosis	genitourinary	158	162	0.0647806	0.0259324	2.60182	6.65722e-17	2.70967e-15	2.48987	9.73135e-15	3.85669e-13	FALSE
726.1	Enthesopathy	musculoskeletal	47	95	0.0192702	0.0152073	1.27242	0.180644	0.811795	1.12206	0.533343	0.999999	FALSE
345	Epilepsy, recurrent seizures, convulsions	neurological	10	45	0.00410004	0.00720346	0.567403	0.105845	0.640172	0.599335	0.152502	0.804196	FALSE
477	Epistaxis or throat hemorrhage	respiratory	10	49	0.00410004	0.00784377	0.520748	0.0606666	0.468533	0.498521	0.0488492	0.437898	FALSE
401.1	Essential hypertension	circulatory system	104	348	0.0426404	0.0557067	0.754998	0.0140216	0.171063	0.709591	0.00367054	0.0569879	FALSE
381.2	Eustachian tube disorders	sense organs	17	42	0.00697007	0.00672323	1.03697	0.899842	0.975999	1.08857	0.773238	0.999999	FALSE
626.12	Excessive or frequent menstruation	genitourinary	107	157	0.0438704	0.0251321	1.77981	6.34982e-06	0.000151791	1.65838	0.000129092	0.00266318	FALSE
643	Excessive vomiting in pregnancy	pregnancy complications	68	221	0.0278803	0.035377	0.782013	0.0807061	0.545038	0.824589	0.180722	0.866987	FALSE
728.7	Fasciitis	musculoskeletal	15	49	0.00615006	0.00784377	0.782734	0.407998	0.975999	0.701201	0.241601	0.950515	FALSE
661	Fetal distress and abnormal forces of labor	pregnancy complications	146	1282	0.0598606	0.205219	0.246593	1.66525e-53	1.47521e-51	0.246288	3.8229e-52	4.11234e-50	FALSE
783	Fever of unknown origin	symptoms	51	145	0.0209102	0.0232111	0.898752	0.516596	0.975999	0.900713	0.537464	0.999999	FALSE
561.2	Flatulence	digestive	53	103	0.0217302	0.0164879	1.32501	0.0993403	0.616723	1.23487	0.228083	0.932583	FALSE
801	Fracture of ankle and foot	injuries & poisonings	14	46	0.00574006	0.00736353	0.778252	0.412879	0.975999	0.755866	0.370675	0.999999	FALSE
599.5	Frequency of urination and polyuria	genitourinary	90	196	0.0369004	0.0313751	1.18285	0.195168	0.842188	1.15799	0.27162	0.973952	FALSE
596.5	Functional disorders of bladder	genitourinary	11	22	0.00451005	0.00352169	1.28192	0.502125	0.975999	1.28018	0.51407	0.999999	FALSE
727.4	Ganglion and cyst of synovium, tendon, and bursa	musculoskeletal	16	42	0.00656007	0.00672323	0.975571	0.933132	0.975999	0.969948	0.919796	0.999999	FALSE
535.9	Gastritis and duodenitis, NOS	digestive	12	28	0.00492005	0.00448215	1.09818	0.786554	0.975999	1.13775	0.717194	0.999999	FALSE
300.11	Generalized anxiety disorder	mental disorders	49	203	0.0200902	0.0324956	0.610417	0.00216879	0.037979	0.627025	0.00442956	0.067383	FALSE
618	Genital prolapse	genitourinary	18	109	0.00738007	0.0174484	0.418676	0.000656822	0.0125212	0.415877	0.000718025	0.0135168	FALSE
530.11	GERD	digestive	156	569	0.0639606	0.0910837	0.68187	4.38665e-05	0.000943757	0.673906	4.04569e-05	0.000896002	FALSE
242.1	Graves' disease	endocrine/metabolic	18	49	0.00738007	0.00784377	0.940445	0.824356	0.975999	0.793091	0.414977	0.999999	FALSE
735.3	Hallux valgus (Bunion)	musculoskeletal	15	24	0.00615006	0.00384184	1.60453	0.151923	0.772958	1.69116	0.120655	0.718207	FALSE
389	Hearing loss	sense organs	29	56	0.0118901	0.0089643	1.33031	0.214702	0.895683	1.32379	0.23966	0.94981	FALSE
530.9	Heartburn	digestive	26	113	0.0106601	0.0180887	0.5849	0.0142547	0.171063	0.606153	0.0247626	0.266374	FALSE
228	Hemangioma and lymphangioma, any site	neoplasms	15	45	0.00615006	0.00720346	0.85286	0.594641	0.975999	0.785767	0.430509	0.999999	FALSE
228.1	Hemangioma of skin and subcutaneous tissue	neoplasms	33	100	0.0135301	0.0160077	0.843105	0.398629	0.975999	0.856612	0.45544	0.999999	FALSE
593	Hematuria	genitourinary	27	55	0.0110701	0.00880423	1.26024	0.327462	0.975999	1.27283	0.320782	0.999999	FALSE
636.3	Hemorrhage in early pregnancy	pregnancy complications	404	291	0.165642	0.0465824	4.0633	5.09111e-67	7.66721e-65	4.21841	1.84269e-66	3.46887e-64	FALSE
459.1	Hemorrhage NOS	circulatory system	13	21	0.00533005	0.00336161	1.5887	0.190627	0.832602	1.59453	0.197218	0.876677	FALSE
578.8	Hemorrhage of rectum and anus	digestive	23	60	0.00943009	0.00960461	0.981657	0.940111	0.975999	0.980403	0.937403	0.999999	FALSE
455	Hemorrhoids	circulatory system	76	285	0.0311603	0.0456219	0.672817	0.00255647	0.0432426	0.674819	0.00335235	0.0531435	FALSE
54	Herpes simplex	infectious diseases	76	399	0.0311603	0.0638707	0.471394	3.6764e-09	1.17801e-07	0.450547	8.63423e-10	2.88959e-08	FALSE
53	Herpes zoster	infectious diseases	10	29	0.00410004	0.00464223	0.882725	0.734282	0.975999	0.965943	0.926597	0.999999	FALSE
704.2	Hirsutism	dermatologic	18	20	0.00738007	0.00320154	2.31487	0.00998108	0.13421	2.25157	0.0163906	0.194364	FALSE
595	Hydronephrosis	genitourinary	12	46	0.00492005	0.00736353	0.666523	0.211986	0.89176	0.608776	0.134566	0.75901	FALSE
272.11	Hypercholesterolemia	endocrine/metabolic	12	51	0.00492005	0.00816392	0.600693	0.113166	0.673626	0.592206	0.111091	0.685671	FALSE
643.1	Hyperemesis gravidarum	pregnancy complications	24	89	0.0098401	0.0142468	0.687613	0.105329	0.639639	0.72629	0.176606	0.863532	FALSE
705.8	Hyperhidrosis	dermatologic	14	28	0.00574006	0.00448215	1.28227	0.448717	0.975999	1.24936	0.506023	0.999999	FALSE
272.1	Hyperlipidemia	endocrine/metabolic	49	102	0.0200902	0.0163278	1.23515	0.228777	0.915682	1.07266	0.699513	0.999999	FALSE
367.8	Hypermetropia	sense organs	11	13	0.00451005	0.002081	2.17254	0.0586619	0.46357	2.00912	0.102628	0.660505	FALSE
642	Hypertension complicating pregnancy, childbirth, and the puerperium	pregnancy complications	169	1401	0.0692907	0.224268	0.257517	6.01038e-57	6.46545e-55	0.248139	8.04665e-58	1.00985e-55	FALSE
623	Hypertrophy of female genital organs	genitourinary	48	87	0.0196802	0.0139267	1.42142	0.0525607	0.454042	1.41104	0.0645795	0.503921	FALSE
276.14	Hypopotassemia	endocrine/metabolic	14	41	0.00574006	0.00656315	0.873865	0.664089	0.975999	0.869764	0.661509	0.999999	FALSE
276.12	Hyposmolality and/or hyponatremia	endocrine/metabolic	11	30	0.00451005	0.00480231	0.938866	0.858286	0.975999	0.869007	0.699739	0.999999	FALSE
458.9	Hypotension NOS	circulatory system	28	53	0.0114801	0.00848407	1.35724	0.193402	0.838196	1.44918	0.123838	0.72485	FALSE
244.4	Hypothyroidism NOS	endocrine/metabolic	255	666	0.104551	0.106611	0.97842	0.779289	0.975999	0.914517	0.265056	0.96753	FALSE
276.5	Hypovolemia	endocrine/metabolic	14	51	0.00574006	0.00816392	0.701387	0.241244	0.926624	0.692137	0.234874	0.940746	FALSE
380.4	Impacted cerumen	sense organs	30	61	0.0123001	0.00976469	1.26289	0.29804	0.975999	1.24335	0.345705	0.999999	FALSE
250.41	Impaired fasting glucose	endocrine/metabolic	42	203	0.0172202	0.0324956	0.521687	0.000144593	0.00298297	0.500823	7.79279e-05	0.00170086	FALSE
647.1	Infections of genitourinary tract during pregnancy	pregnancy complications	87	354	0.0356704	0.0566672	0.615765	7.1719e-05	0.00152125	0.616387	0.000105045	0.00219718	FALSE
647	Infectious and parasitic complications affecting pregnancy	pregnancy complications	107	780	0.0438704	0.12486	0.321595	1.00865e-26	5.238e-25	0.32162	5.40693e-26	2.80787e-24	FALSE
626.8	Infertility, female	genitourinary	1179	1043	0.483395	0.16696	4.6687	6.68367e-187	5.0328e-184	4.18353	3.13558e-148	1.57406e-145	FALSE
626.15	Infertility, female, associated with anovulation	genitourinary	175	166	0.0717507	0.0265728	2.83158	7.39578e-21	3.48064e-19	2.55679	2.85018e-16	1.22639e-14	FALSE
371.3	Inflammation of eyelids	sense organs	22	47	0.00902009	0.00752361	1.20071	0.480772	0.975999	1.09718	0.728467	0.999999	FALSE
613.1	Inflammatory disease of breast	genitourinary	10	50	0.00410004	0.00800384	0.510251	0.0526555	0.454042	0.504226	0.0535456	0.463446	FALSE
614.4	Inflammatory diseases of uterus, except cervix	genitourinary	32	39	0.0131201	0.006243	2.11622	0.00176562	0.0320364	2.11319	0.00241037	0.0394566	FALSE
481	Influenza	respiratory	13	30	0.00533005	0.00480231	1.11048	0.752924	0.975999	1.19008	0.609864	0.999999	FALSE
1009	Injury, NOS	NULL	73	206	0.0299303	0.0329758	0.904794	0.469592	0.975999	0.87749	0.358637	0.999999	FALSE
912	Insect bite	injuries & poisonings	14	25	0.00574006	0.00400192	1.43683	0.278812	0.975999	1.56796	0.18724	0.866987	FALSE
327.4	Insomnia	neurological	76	178	0.0311603	0.0284937	1.0966	0.507549	0.975999	1.02315	0.872909	0.999999	FALSE
835	Internal derangement of knee	injuries & poisonings	18	21	0.00738007	0.00336161	2.20428	0.0141314	0.171063	1.89077	0.0582038	0.489692	FALSE
271.3	Intestinal disaccharidase deficiencies and disaccharide malabsorption	endocrine/metabolic	40	98	0.0164002	0.0156875	1.04618	0.811356	0.975999	0.916279	0.655182	0.999999	FALSE
280.2	Iron deficiency anemia secondary to blood loss (chronic)	hematopoietic	14	33	0.00574006	0.00528254	1.08711	0.793992	0.975999	0.889551	0.72495	0.999999	FALSE
280.1	Iron deficiency anemias, unspecified or not due to blood loss	hematopoietic	57	227	0.0233702	0.0363374	0.634605	0.00245105	0.0419463	0.595808	0.000763015	0.0141864	FALSE
626.14	Irregular menstrual bleeding	genitourinary	46	85	0.0188602	0.0136065	1.39354	0.0722632	0.51823	1.3017	0.16588	0.835502	FALSE
626.13	Irregular menstrual cycle	genitourinary	268	381	0.109881	0.0609893	1.90061	1.56e-14	5.87341e-13	1.96269	4.61881e-15	1.87998e-13	FALSE
626.1	Irregular menstrual cycle/bleeding	genitourinary	61	56	0.0250103	0.0089643	2.8359	2.33683e-08	7.03853e-07	2.73024	1.80867e-07	5.23819e-06	FALSE
564.1	Irritable Bowel Syndrome	digestive	27	64	0.0110701	0.0102449	1.08145	0.734341	0.975999	1.14161	0.574777	0.999999	FALSE
741.4	Joint effusions	musculoskeletal	29	48	0.0118901	0.00768369	1.55404	0.0622164	0.478051	1.59065	0.0586337	0.489799	FALSE
840.3	Joint/ligament sprain	injuries & poisonings	37	76	0.0151702	0.0121658	1.25075	0.267777	0.960173	1.21166	0.356855	0.999999	FALSE
655	Known or suspected fetal abnormality affecting management of mother	pregnancy complications	914	3567	0.374744	0.570994	0.450306	1.50082e-59	1.88353e-57	0.444741	2.73369e-58	3.74266e-56	FALSE
737.3	Kyphoscoliosis and scoliosis	musculoskeletal	17	56	0.00697007	0.0089643	0.775975	0.36149	0.975999	0.907224	0.73271	0.999999	FALSE
645	Late pregnancy and failed induction	pregnancy complications	166	1562	0.0680607	0.25004	0.219047	1.63888e-70	2.74239e-68	0.228279	5.1933e-65	7.82111e-63	FALSE
214.1	Lipoma of skin and subcutaneous tissue	neoplasms	11	18	0.00451005	0.00288138	1.5678	0.240922	0.926624	1.44133	0.35331	0.999999	FALSE
687.2	Localized superficial swelling, mass, or lump	dermatologic	40	102	0.0164002	0.0163278	1.0045	0.980942	0.983555	0.933609	0.721054	0.999999	FALSE
611.3	Lump or mass in breast	genitourinary	104	280	0.0426404	0.0448215	0.949171	0.656791	0.975999	0.953239	0.691146	0.999999	FALSE
289.4	Lymphadenitis	hematopoietic	42	96	0.0172202	0.0153674	1.12268	0.535086	0.975999	1.14916	0.470789	0.999999	FALSE
296.22	Major depressive disorder	mental disorders	152	565	0.0623206	0.0904434	0.66839	2.0837e-05	0.000461477	0.658621	1.69487e-05	0.000386739	FALSE
647.3	Major puerperal infection	pregnancy complications	10	84	0.00410004	0.0134465	0.302055	0.000357404	0.00699027	0.284459	0.000213549	0.00428807	FALSE
798	Malaise and fatigue	symptoms	131	352	0.0537105	0.056347	0.950554	0.629937	0.975999	0.905436	0.358729	0.999999	FALSE
652	Malposition and malpresentation of fetus or obstruction	pregnancy complications	147	1062	0.0602706	0.170002	0.313132	6.79738e-37	4.26535e-35	0.313434	7.99531e-36	4.63113e-34	FALSE
613.5	Mastodynia	genitourinary	60	156	0.0246002	0.024972	0.984738	0.920359	0.975999	1.03413	0.831806	0.999999	FALSE
658	Maternal complication of pregnancy affecting fetus or newborn	pregnancy complications	32	119	0.0131201	0.0190491	0.684614	0.0588875	0.46357	0.58318	0.00886593	0.122496	FALSE
857	Mechanical complication of unspecified genitourinary device, implant, and graft	injuries & poisonings	12	52	0.00492005	0.008324	0.589046	0.099356	0.616723	0.649785	0.190624	0.86731	FALSE
306.1	Mental disorders durring/after pregnancy	mental disorders	203	1369	0.0832308	0.219145	0.323491	8.06602e-46	5.78449e-44	0.313602	3.31261e-46	2.4944e-44	FALSE
340.1	Migrain with aura	neurological	35	116	0.0143501	0.0185689	0.769497	0.177597	0.811795	0.737167	0.12657	0.730323	FALSE
340	Migraine	neurological	92	315	0.0377204	0.0504242	0.738185	0.0121089	0.151967	0.750355	0.0209101	0.233264	FALSE
262	Mineral deficiency NEC	endocrine/metabolic	13	39	0.00533005	0.006243	0.852982	0.620494	0.975999	0.846191	0.612532	0.999999	FALSE
296	Mood disorders	mental disorders	14	64	0.00574006	0.0102449	0.557745	0.04857	0.435395	0.502263	0.02219	0.24216	FALSE
278.11	Morbid obesity	endocrine/metabolic	26	96	0.0106601	0.0153674	0.690384	0.0957008	0.610701	0.564249	0.0130015	0.168795	FALSE
622.2	Mucous polyp of cervix	genitourinary	33	82	0.0135301	0.0131263	1.03119	0.882366	0.975999	0.936863	0.758601	0.999999	FALSE
651	Multiple gestation	pregnancy complications	140	245	0.0574006	0.0392188	1.49183	0.000234828	0.00471535	1.39163	0.00315228	0.0505035	FALSE
335	Multiple sclerosis	neurological	11	17	0.00451005	0.00272131	1.66029	0.19097	0.832602	1.73485	0.162286	0.820143	FALSE
770	Myalgia and myositis unspecified	symptoms	25	57	0.0102501	0.00912438	1.12465	0.626057	0.975999	0.944147	0.817804	0.999999	FALSE
367.1	Myopia	sense organs	52	115	0.0213202	0.0184088	1.1616	0.374982	0.975999	1.20713	0.279361	0.982987	FALSE
789	Nausea and vomiting	symptoms	120	316	0.0492005	0.0505843	0.971228	0.790684	0.975999	1.04506	0.697267	0.999999	FALSE
199	Neoplasm of uncertain behavior	neoplasms	22	50	0.00902009	0.00800384	1.12813	0.638952	0.975999	1.09211	0.739811	0.999999	FALSE
173	Neoplasm of uncertain behavior of skin	neoplasms	63	232	0.0258303	0.0371378	0.687451	0.00931227	0.127493	0.66015	0.0049292	0.0734987	FALSE
766	Neuralgia, neuritis, and radiculitis NOS	symptoms	14	23	0.00574006	0.00368177	1.56228	0.189226	0.83083	1.28978	0.472875	0.999999	FALSE
217.1	Nevus, non-neoplastic	neoplasms	21	87	0.00861009	0.0139267	0.614928	0.0465615	0.421732	0.610479	0.048011	0.437898	FALSE
558	Noninfectious gastroenteritis	digestive	33	85	0.0135301	0.0136065	0.994308	0.977949	0.983505	0.986222	0.947849	0.999999	FALSE
619.3	Noninflammatory disorders of cervix	genitourinary	103	265	0.0422304	0.0424204	0.995325	0.968496	0.983505	0.980843	0.873542	0.999999	FALSE
619.1	Noninflammatory disorders of ovary, fallopian tube, and broad ligament	genitourinary	89	176	0.0364904	0.0281735	1.30638	0.0434004	0.409137	1.14987	0.305345	0.997149	FALSE
619.4	Noninflammatory disorders of vagina	genitourinary	179	495	0.0733907	0.079238	0.920361	0.360101	0.975999	0.979503	0.824154	0.999999	FALSE
619.5	Noninflammatory disorders of vulva and perineum	genitourinary	60	150	0.0246002	0.0240115	1.02514	0.872467	0.975999	1.03151	0.845038	0.999999	FALSE
619	Noninflammatory female genital disorders	genitourinary	85	87	0.0348503	0.0139267	2.55667	1.21064e-09	3.96352e-08	2.43429	2.20869e-08	6.78833e-07	FALSE
395.1	Nonrheumatic mitral valve disorders	circulatory system	13	38	0.00533005	0.00608292	0.875569	0.680032	0.975999	0.892535	0.728225	0.999999	FALSE
579.8	Nonspecific abnormal findings in stool contents	digestive	18	28	0.00738007	0.00448215	1.65135	0.0979004	0.614901	1.55738	0.154887	0.809457	FALSE
793	Nonspecific abnormal findings on radiological and other examination of musculoskeletal system	symptoms	10	20	0.00410004	0.00320154	1.2818	0.522299	0.975999	1.41022	0.385841	0.999999	FALSE
793.2	Nonspecific abnormal findings on radiological and other examination of other intrathoracic organs (echocardiogram, etc)	symptoms	17	27	0.00697007	0.00432207	1.61697	0.121747	0.697678	1.43175	0.264071	0.96753	FALSE
418	Nonspecific chest pain	circulatory system	129	335	0.0528905	0.0536257	0.985524	0.891083	0.975999	0.974154	0.811485	0.999999	FALSE
241.2	Nontoxic multinodular goiter	endocrine/metabolic	13	32	0.00533005	0.00512246	1.04074	0.90361	0.975999	0.916296	0.797522	0.999999	FALSE
241	Nontoxic nodular goiter	endocrine/metabolic	11	29	0.00451005	0.00464223	0.971397	0.934832	0.975999	1.15406	0.694453	0.999999	FALSE
241.1	Nontoxic uninodular goiter	endocrine/metabolic	37	77	0.0151702	0.0123259	1.23431	0.296097	0.975999	1.10712	0.623191	0.999999	FALSE
650	Normal delivery	pregnancy complications	286	3018	0.117261	0.483112	0.142125	6.72455e-182	3.37572e-179	0.14912	2.08738e-168	1.5718e-165	FALSE
278.1	Obesity	endocrine/metabolic	108	363	0.0442804	0.0581079	0.751013	0.0107867	0.137668	0.688743	0.00136155	0.0238429	FALSE
665	Obstetrical/birth trauma	pregnancy complications	313	3283	0.128331	0.525532	0.132919	1.27903e-207	1.92622e-204	0.139874	1.29621e-190	1.9521e-187	FALSE
575.2	Obstruction of bile duct	digestive	15	84	0.00615006	0.0134465	0.454016	0.00500437	0.0753658	0.518476	0.0214246	0.237204	FALSE
327.32	Obstructive sleep apnea	neurological	30	69	0.0123001	0.0110453	1.11502	0.620695	0.975999	0.846494	0.465169	0.999999	FALSE
740.9	Osteoarthrosis NOS	musculoskeletal	17	24	0.00697007	0.00384184	1.81997	0.0596142	0.46357	1.54795	0.180676	0.866987	FALSE
743.9	Osteopenia or other disorder of bone and cartilage	musculoskeletal	19	49	0.00779008	0.00784377	0.993102	0.979646	0.983505	0.894	0.688623	0.999999	FALSE
382	Otalgia	sense organs	25	47	0.0102501	0.00752361	1.36614	0.209664	0.886844	1.37987	0.208732	0.903001	FALSE
790.6	Other abnormal blood chemistry	symptoms	63	159	0.0258303	0.0254522	1.01525	0.920084	0.975999	1.0194	0.901229	0.999999	FALSE
250.42	Other abnormal glucose	endocrine/metabolic	59	241	0.0241902	0.0385785	0.617794	0.00107381	0.019965	0.606574	0.000920359	0.0169032	FALSE
599.9	Other abnormality of urination	genitourinary	36	109	0.0147601	0.0174484	0.843624	0.380074	0.975999	0.85167	0.416485	0.999999	FALSE
795	Other and nonspecific abnormal cytological, histological and immunological findings	symptoms	16	71	0.00656007	0.0113655	0.574401	0.0459389	0.421732	0.544742	0.0324483	0.33243	FALSE
286.7	Other and unspecified coagulation defects	hematopoietic	11	29	0.00451005	0.00464223	0.971397	0.934832	0.975999	0.888323	0.746053	0.999999	FALSE
654	Other and unspecified complications of birth; puerperium affecting management of mother	pregnancy complications	247	1497	0.101271	0.239635	0.357543	1.21346e-44	8.30666e-43	0.343465	3.98441e-46	2.85739e-44	FALSE
285	Other anemias	hematopoietic	162	962	0.0664207	0.153994	0.390861	2.70637e-26	1.3586e-24	0.383919	3.72527e-26	2.00366e-24	FALSE
215	Other benign neoplasm of connective and other soft tissue	neoplasms	44	94	0.0180402	0.0150472	1.20256	0.316764	0.975999	1.06561	0.736561	0.999999	FALSE
571.5	Other chronic nonalcoholic liver disease	digestive	16	58	0.00656007	0.00928446	0.704627	0.216715	0.899098	0.675542	0.175682	0.863532	FALSE
646	Other complications of pregnancy NEC	pregnancy complications	618	2921	0.253383	0.467584	0.386429	6.20909e-72	1.33584e-69	0.395349	2.57889e-65	4.31534e-63	FALSE
674	Other complications of the puerperium NEC	pregnancy complications	62	516	0.0254203	0.0825996	0.289696	1.19684e-19	5.3013e-18	0.28656	1.82443e-19	8.86319e-18	FALSE
649	Other conditions or status of the mother complicating pregnancy, childbirth, or the puerperium	pregnancy complications	673	3634	0.275933	0.581719	0.274018	1.66113e-136	6.25414e-134	0.269836	5.69153e-132	2.14286e-129	FALSE
742.9	Other derangement of joint	musculoskeletal	51	104	0.0209102	0.016648	1.26149	0.178457	0.811795	1.29681	0.144128	0.77797	FALSE
733	Other disorders of bone and cartilage	musculoskeletal	19	41	0.00779008	0.00656315	1.18841	0.535475	0.975999	1.15959	0.603746	0.999999	FALSE
388	Other disorders of ear	sense organs	16	43	0.00656007	0.0068833	0.95273	0.869095	0.975999	0.992022	0.978914	0.999999	FALSE
374	Other disorders of eyelids	sense organs	14	28	0.00574006	0.00448215	1.28227	0.448717	0.975999	1.34797	0.374728	0.999999	FALSE
573	Other disorders of liver	digestive	13	49	0.00533005	0.00784377	0.67781	0.213919	0.894982	0.678203	0.223647	0.925309	FALSE
568	Other disorders of peritoneum	digestive	10	23	0.00410004	0.00368177	1.11407	0.775937	0.975999	1.02756	0.944425	0.999999	FALSE
729	Other disorders of soft tissues	musculoskeletal	34	96	0.0139401	0.0153674	0.905813	0.622635	0.975999	0.882917	0.546002	0.999999	FALSE
537	Other disorders of stomach and duodenum	digestive	13	14	0.00533005	0.00224108	2.38573	0.0242498	0.264639	2.10017	0.0604392	0.494682	FALSE
676	Other disorders of the breast associated with childbirth and disorders of lactation	pregnancy complications	45	289	0.0184502	0.0462622	0.387517	4.94081e-09	1.55018e-07	0.383874	5.99481e-09	1.88087e-07	FALSE
586	Other disorders of the kidney and ureters	genitourinary	11	56	0.00451005	0.0089643	0.50086	0.0365264	0.361899	0.483955	0.0315304	0.325238	FALSE
246	Other disorders of thyroid	endocrine/metabolic	54	186	0.0221402	0.0297743	0.737797	0.0519474	0.454042	0.676848	0.0147055	0.180052	FALSE
694.2	Other dyschromia	dermatologic	124	346	0.0508405	0.0553866	0.913525	0.400149	0.975999	0.901342	0.347002	0.999999	FALSE
512.9	Other dyspnea	respiratory	43	130	0.0176302	0.02081	0.844456	0.341033	0.975999	0.798178	0.217675	0.92234	FALSE
259	Other endocrine disorders	endocrine/metabolic	16	28	0.00656007	0.00448215	1.46666	0.223027	0.907779	1.59062	0.149628	0.793514	FALSE
339	Other headache syndromes	neurological	110	328	0.0451005	0.0525052	0.85231	0.156798	0.786536	0.8368	0.12514	0.72485	FALSE
282.8	Other hemoglobinopathies	hematopoietic	32	108	0.0131201	0.0172883	0.755697	0.166998	0.811131	0.805062	0.298925	0.995609	FALSE
638	Other high-risk pregnancy	pregnancy complications	1396	5058	0.572366	0.809669	0.314633	3.666e-109	9.20166e-107	0.322653	4.59995e-98	1.15459e-95	FALSE
401.3	Other hypertensive complications	circulatory system	10	19	0.00410004	0.00304146	1.34948	0.443829	0.975999	1.47644	0.3355	0.999999	FALSE
701	Other hypertrophic and atrophic conditions of skin	dermatologic	49	135	0.0200902	0.0216104	0.928213	0.658447	0.975999	0.906084	0.568204	0.999999	FALSE
1019	Other ill-defined and unknown causes of morbidity and mortality	NULL	56	98	0.0229602	0.0156875	1.47449	0.0217674	0.242867	1.38239	0.0638878	0.503744	FALSE
279.7	Other immunological findings	endocrine/metabolic	24	13	0.0098401	0.002081	4.7656	6.09057e-06	0.000147942	5.04592	4.51445e-06	0.000109658	FALSE
686	Other local infections of skin and subcutaneous tissue	dermatologic	11	30	0.00451005	0.00480231	0.938866	0.858286	0.975999	0.943343	0.872776	0.999999	FALSE
598.9	Other nonspecific findings on examination of urine	genitourinary	44	164	0.0180402	0.0262526	0.68143	0.0253045	0.274162	0.700124	0.0425793	0.411054	FALSE
656	Other perinatal conditions of fetus or newborn	pregnancy complications	496	1598	0.203362	0.255803	0.742663	2.99602e-07	8.05715e-06	0.733544	2.16081e-07	6.06561e-06	FALSE
351	Other peripheral nerve disorders	neurological	53	216	0.0217302	0.0345766	0.620213	0.00208252	0.0368973	0.595103	0.0011381	0.0204045	FALSE
613.7	Other signs and symptoms in breast	genitourinary	24	60	0.0098401	0.00960461	1.02476	0.919726	0.975999	1.12742	0.628716	0.999999	FALSE
1004	Other signs and symptoms involving emotional state	NULL	21	55	0.00861009	0.00880423	0.977758	0.930427	0.975999	0.994795	0.984275	0.999999	FALSE
427.3	Other specified cardiac dysrhythmias	circulatory system	32	91	0.0131201	0.014567	0.899355	0.6082	0.975999	0.887798	0.574649	0.999999	FALSE
704.8	Other specified diseases of hair and hair follicles	dermatologic	19	42	0.00779008	0.00672323	1.15993	0.592934	0.975999	1.21239	0.496809	0.999999	FALSE
706.8	Other specified diseases of sebaceous glands	dermatologic	15	42	0.00615006	0.00672323	0.914221	0.766302	0.975999	1.00703	0.981932	0.999999	FALSE
279.8	Other specified disorders involving the immune mechanism	endocrine/metabolic	32	10	0.0131201	0.00160077	8.29182	5.67932e-09	1.74552e-07	7.63828	5.01518e-08	1.48095e-06	FALSE
613.8	Other specified disorders of breast	genitourinary	24	62	0.0098401	0.00992476	0.991384	0.97143	0.983505	0.868184	0.568832	0.999999	FALSE
1005	Other symptoms	NULL	45	87	0.0184502	0.0139267	1.33091	0.122683	0.699854	1.38524	0.0867498	0.59929	FALSE
579	Other symptoms involving abdomen and pelvis	digestive	26	60	0.0106601	0.00960461	1.11108	0.65539	0.975999	1.06739	0.788563	0.999999	FALSE
599.8	Other symptoms involving urinary system	genitourinary	40	123	0.0164002	0.0196895	0.830156	0.310667	0.975999	0.808551	0.257971	0.96753	FALSE
599	Other symptoms/disorders or the urinary system	genitourinary	17	36	0.00697007	0.00576277	1.21097	0.516771	0.975999	1.16169	0.620512	0.999999	FALSE
1010	Other tests	NULL	325	1862	0.133251	0.298063	0.36205	5.85068e-54	5.87409e-52	0.371685	1.87806e-49	1.76772e-47	FALSE
479	Other upper respiratory disease	respiratory	65	170	0.0266503	0.0272131	0.978753	0.88449	0.975999	0.958418	0.780009	0.999999	FALSE
380.1	Otitis externa	sense organs	14	30	0.00574006	0.00480231	1.1964	0.580606	0.975999	1.19018	0.601964	0.999999	FALSE
381.1	Otitis media	sense organs	10	29	0.00410004	0.00464223	0.882725	0.734282	0.975999	0.798393	0.554659	0.999999	FALSE
628	Ovarian cyst	genitourinary	284	352	0.116441	0.056347	2.20705	2.93527e-21	1.42597e-19	2.02968	2.42906e-16	1.07593e-14	FALSE
256	Ovarian dysfunction	endocrine/metabolic	123	90	0.0504305	0.0144069	3.63323	5.17431e-20	2.36137e-18	2.90802	1.98762e-13	7.48338e-12	FALSE
625	Pain and other symptoms associated with female genital organs	genitourinary	116	282	0.0475605	0.0451417	1.05626	0.628075	0.975999	1.03614	0.759641	0.999999	FALSE
745	Pain in joint	musculoskeletal	246	661	0.100861	0.105811	0.947973	0.497868	0.975999	0.914063	0.267932	0.972301	FALSE
773	Pain in limb	symptoms	176	415	0.0721607	0.0664319	1.09294	0.340809	0.975999	1.0153	0.874569	0.999999	FALSE
379.9	Pain, swelling or discharge of eye	sense organs	15	23	0.00615006	0.00368177	1.67456	0.121288	0.697678	1.65635	0.14043	0.77185	FALSE
512.2	Painful respiration	respiratory	18	59	0.00738007	0.00944453	0.779787	0.357516	0.975999	0.73631	0.270475	0.973952	FALSE
427.9	Palpitations	circulatory system	113	335	0.0463305	0.0536257	0.85735	0.167505	0.811131	0.877186	0.251579	0.96753	FALSE
792.1	Papanicolaou smear of cervix or vagina with atypical squamous cells	genitourinary	143	438	0.0586306	0.0701137	0.826022	0.0545369	0.46357	0.833337	0.0729321	0.538411	FALSE
427.11	Paroxysmal supraventricular tachycardia	circulatory system	20	90	0.00820008	0.0144069	0.565615	0.0217709	0.242867	0.537092	0.014553	0.179646	FALSE
614.1	Pelvic peritoneal adhesions, female (postoperative) (postinfection)	genitourinary	25	48	0.0102501	0.00768369	1.33747	0.240636	0.926624	1.33593	0.253029	0.96753	FALSE
726	Peripheral enthesopathies and allied syndromes	musculoskeletal	19	42	0.00779008	0.00672323	1.15993	0.592934	0.975999	1.01031	0.97122	0.999999	FALSE
386.2	Peripheral or central vertigo	sense organs	10	12	0.00410004	0.00192092	2.13908	0.076213	0.534577	1.74809	0.214791	0.918604	FALSE
568.1	Peritoneal adhesions (postoperative) (postinfection)	digestive	12	50	0.00492005	0.00800384	0.612806	0.128713	0.728225	0.583065	0.102449	0.660505	FALSE
451	Phlebitis and thrombophlebitis	circulatory system	17	134	0.00697007	0.0214503	0.320202	1.06184e-05	0.000249864	0.311375	9.82061e-06	0.000234759	FALSE
300.13	Phobia	mental disorders	10	19	0.00410004	0.00304146	1.34948	0.443829	0.975999	1.42112	0.383514	0.999999	FALSE
253.1	Pituitary hyperfunction	endocrine/metabolic	17	18	0.00697007	0.00288138	2.42896	0.00885691	0.122372	2.84562	0.00266519	0.0431588	FALSE
635.3	Placenta previa and abruptio placenta	pregnancy complications	145	1089	0.0594506	0.174324	0.299384	2.39345e-39	1.56719e-37	0.292619	1.94417e-39	1.33088e-37	FALSE
507	Pleurisy; pleural effusion	respiratory	14	38	0.00574006	0.00608292	0.94331	0.852347	0.975999	0.959168	0.897135	0.999999	FALSE
480	Pneumonia	respiratory	13	34	0.00533005	0.00544261	0.979208	0.948763	0.978472	1.08923	0.799755	0.999999	FALSE
256.4	Polycystic ovaries	endocrine/metabolic	99	144	0.0405904	0.0230511	1.79308	1.09754e-05	0.000254291	1.89835	2.62688e-06	6.48537e-05	FALSE
622.1	Polyp of corpus uteri	genitourinary	192	154	0.0787208	0.0246518	3.38072	4.86434e-28	2.61632e-26	2.86129	3.97034e-20	1.99311e-18	FALSE
475.9	Postnasal drip	respiratory	24	38	0.0098401	0.00608292	1.6238	0.0641083	0.485161	1.61847	0.0719438	0.533731	FALSE
300.9	Posttraumatic stress disorder	mental disorders	29	89	0.0118901	0.0142468	0.832589	0.394486	0.975999	0.790454	0.28901	0.98496	FALSE
642.1	Preeclampsia and eclampsia	pregnancy complications	81	795	0.0332103	0.127261	0.235575	7.36304e-34	4.10694e-32	0.217125	2.04619e-36	1.28398e-34	FALSE
427.6	Premature beats	circulatory system	12	49	0.00492005	0.00784377	0.625413	0.146176	0.748778	0.570029	0.0889248	0.605976	FALSE
627.5	Premature menopause and other ovarian failure	genitourinary	357	245	0.146371	0.0392188	4.20066	1.8885e-61	2.58552e-59	3.12621	2.25772e-36	1.36005e-34	FALSE
626.4	Premenstrual tension syndromes	genitourinary	13	12	0.00533005	0.00192092	2.78425	0.0106696	0.137337	2.26815	0.0483123	0.437898	FALSE
286.81	Primary hypercoagulable state	hematopoietic	78	60	0.0319803	0.00960461	3.40665	1.56919e-12	5.62668e-11	3.49055	2.43109e-12	8.7172e-11	FALSE
287.31	Primary thrombocytopenia	hematopoietic	10	47	0.00410004	0.00752361	0.543083	0.0803058	0.544777	0.504704	0.0546625	0.467737	FALSE
653	Problems associated with amniotic cavity and membranes	pregnancy complications	260	1695	0.106601	0.27133	0.320441	5.14752e-57	5.9632e-55	0.321255	8.31673e-55	9.63461e-53	FALSE
618.1	Prolapse of vaginal walls	genitourinary	11	94	0.00451005	0.0150472	0.296554	0.000142446	0.00297949	0.297864	0.000178457	0.00363184	FALSE
269	Proteinuria	endocrine/metabolic	11	45	0.00451005	0.00720346	0.624401	0.162508	0.792031	0.624137	0.172124	0.858342	FALSE
695.7	Prurigo and Lichen	dermatologic	13	40	0.00533005	0.00640307	0.831523	0.564426	0.975999	0.780081	0.449728	0.999999	FALSE
698	Pruritus and related conditions	dermatologic	93	343	0.0381304	0.0549064	0.68235	0.00137294	0.0252152	0.682297	0.00178536	0.0298825	FALSE
696.41	Psoriasis vulgaris	dermatologic	21	48	0.00861009	0.00768369	1.12161	0.662234	0.975999	1.11648	0.6841	0.999999	FALSE
508	Pulmonary collapse; interstitial and compensatory emphysema	respiratory	12	49	0.00492005	0.00784377	0.625413	0.146176	0.748778	0.591574	0.112831	0.690748	FALSE
590	Pyelonephritis	genitourinary	17	35	0.00697007	0.00560269	1.24577	0.45874	0.975999	1.15068	0.645326	0.999999	FALSE
687.1	Rash and other nonspecific skin eruption	dermatologic	113	365	0.0463305	0.058428	0.78289	0.0266259	0.284497	0.786963	0.0343216	0.342307	FALSE
443.1	Raynaud's syndrome	circulatory system	12	32	0.00492005	0.00512246	0.96029	0.904955	0.975999	0.817819	0.56327	0.999999	FALSE
555.1	Regional enteritis	digestive	13	37	0.00533005	0.00592284	0.899378	0.742891	0.975999	1.0897	0.793801	0.999999	FALSE
327.71	Restless legs syndrome	neurological	10	28	0.00410004	0.00448215	0.914397	0.808464	0.975999	0.913222	0.809871	0.999999	FALSE
599.2	Retention of urine	genitourinary	23	112	0.00943009	0.0179286	0.521468	0.00467425	0.0718308	0.479839	0.0017858	0.0298825	FALSE
654.2	Rhesus isoimmunization in pregnancy	pregnancy complications	70	348	0.0287003	0.0557067	0.500878	2.11013e-07	5.77792e-06	0.493853	2.17492e-07	6.06561e-06	FALSE
695.3	Rosacea	dermatologic	33	100	0.0135301	0.0160077	0.843105	0.398629	0.975999	0.84494	0.41439	0.999999	FALSE
701.2	Scar conditions and fibrosis of skin	dermatologic	23	83	0.00943009	0.0132864	0.706994	0.143227	0.7387	0.660196	0.0883224	0.605976	FALSE
764	Sciatica	symptoms	45	163	0.0184502	0.0260925	0.701601	0.0372295	0.365171	0.722114	0.0617003	0.496902	FALSE
706.2	Sebaceous cyst	dermatologic	34	105	0.0139401	0.0168081	0.82696	0.339163	0.975999	0.770646	0.200509	0.883772	FALSE
690.1	Seborrheic dermatitis	dermatologic	37	84	0.0151702	0.0134465	1.13016	0.538162	0.975999	1.0789	0.70975	0.999999	FALSE
702.2	Seborrheic keratosis	dermatologic	81	218	0.0332103	0.0348968	0.950014	0.698477	0.975999	0.870937	0.309621	0.999999	FALSE
244.1	Secondary hypothyroidism	endocrine/metabolic	23	54	0.00943009	0.00864415	1.09179	0.725541	0.975999	0.95644	0.862998	0.999999	FALSE
287.32	Secondary thrombocytopenia	hematopoietic	13	118	0.00533005	0.0188891	0.27833	1.28734e-05	0.000293748	0.270256	1.05243e-05	0.000247651	FALSE
389.1	Sensorineural hearing loss	sense organs	30	56	0.0123001	0.0089643	1.37676	0.159943	0.792031	1.42498	0.129413	0.738243	FALSE
470	Septal Deviations/Turbinate Hypertrophy	respiratory	16	51	0.00656007	0.00816392	0.802246	0.44351	0.975999	0.838878	0.549062	0.999999	FALSE
637	Short gestation; low birth weight; and fetal growth retardation	pregnancy complications	14	61	0.00574006	0.00976469	0.585459	0.0717582	0.517387	0.563816	0.0591812	0.489799	FALSE
512.7	Shortness of breath	respiratory	85	262	0.0348503	0.0419401	0.824851	0.130005	0.728225	0.830864	0.155334	0.809457	FALSE
709.2	Sicca syndrome	dermatologic	11	22	0.00451005	0.00352169	1.28192	0.502125	0.975999	1.36867	0.407055	0.999999	FALSE
240	Simple and unspecified goiter	endocrine/metabolic	10	29	0.00410004	0.00464223	0.882725	0.734282	0.975999	0.860767	0.690892	0.999999	FALSE
327	Sleep disorders	neurological	21	35	0.00861009	0.00560269	1.54144	0.118338	0.693452	1.41458	0.225398	0.92912	FALSE
772.2	Spasm of muscle	symptoms	18	23	0.00738007	0.00368177	2.01196	0.0267512	0.284497	1.75225	0.0888426	0.605976	FALSE
720	Spinal stenosis	musculoskeletal	10	10	0.00410004	0.00160077	2.56772	0.035235	0.351417	1.99497	0.137606	0.76666	FALSE
720.1	Spinal stenosis of lumbar region	musculoskeletal	12	19	0.00492005	0.00304146	1.62071	0.191288	0.832602	1.47901	0.308479	0.999999	FALSE
721.1	Spondylosis without myelopathy	musculoskeletal	16	33	0.00656007	0.00528254	1.24344	0.475838	0.975999	1.11975	0.721066	0.999999	FALSE
840	Sprains and strains	injuries & poisonings	56	145	0.0229602	0.0232111	0.988936	0.944277	0.976034	0.89929	0.517441	0.999999	FALSE
741.2	Stiffness of joint	musculoskeletal	16	23	0.00656007	0.00368177	1.78693	0.0753427	0.534577	1.50515	0.222714	0.923989	FALSE
41.2	Streptococcus infection	infectious diseases	12	106	0.00492005	0.0169681	0.286447	4.27061e-05	0.000932108	0.299102	9.9692e-05	0.0021448	FALSE
624.9	stress incontinence, female	genitourinary	32	199	0.0131201	0.0318553	0.404048	2.3535e-06	5.90728e-05	0.377814	6.11023e-07	1.58655e-05	FALSE
368.9	Subjective visual disturbances	sense organs	10	13	0.00410004	0.002081	1.97422	0.106428	0.641122	2.20298	0.0718448	0.533731	FALSE
316	Substance addiction and disorders	mental disorders	22	76	0.00902009	0.0121658	0.739074	0.21394	0.894982	0.675481	0.115546	0.701661	FALSE
681	Superficial cellulitis and abscess	dermatologic	20	62	0.00820008	0.00992476	0.824788	0.455763	0.975999	0.754604	0.287512	0.98496	FALSE
915	Superficial injury without mention of infection	injuries & poisonings	15	51	0.00615006	0.00816392	0.751796	0.333009	0.975999	0.682955	0.206841	0.897702	FALSE
381.11	Suppurative and unspecified otitis media	sense organs	19	30	0.00779008	0.00480231	1.62704	0.0979923	0.614901	1.63734	0.105331	0.666506	FALSE
771.1	Swelling of limb	symptoms	47	136	0.0192702	0.0217704	0.882897	0.466176	0.975999	0.834278	0.300798	0.995609	FALSE
293.1	Swelling, mass, or lump in head and neck [Space-occupying lesion, intracranial NOS]	mental disorders	32	55	0.0131201	0.00880423	1.49673	0.0713311	0.517387	1.40586	0.138166	0.76666	FALSE
627.2	Symptomatic menopause	genitourinary	10	11	0.00410004	0.00176085	2.33392	0.0527605	0.454042	1.90872	0.152722	0.804196	FALSE
687	Symptoms affecting skin	dermatologic	28	35	0.0114801	0.00560269	2.06122	0.00451085	0.070764	2.02564	0.00733465	0.105676	FALSE
741	Symptoms and disorders of the joints	musculoskeletal	30	66	0.0123001	0.0105651	1.16627	0.487425	0.975999	1.02	0.93105	0.999999	FALSE
429.3	Symptoms involving cardiovascular system	circulatory system	18	44	0.00738007	0.00704338	1.04816	0.866982	0.975999	1.00416	0.988484	0.999999	FALSE
561	Symptoms involving digestive system	digestive	22	86	0.00902009	0.0137666	0.652077	0.074956	0.534577	0.636967	0.0664963	0.516203	FALSE
624	Symptoms involving female genital tract	genitourinary	38	85	0.0155802	0.0136065	1.14735	0.484508	0.975999	1.08315	0.692424	0.999999	FALSE
781	Symptoms involving nervous and musculoskeletal systems	symptoms	10	19	0.00410004	0.00304146	1.34948	0.443829	0.975999	1.41486	0.390253	0.999999	FALSE
519.9	Symptoms involving respiratory system and other chest symptoms	respiratory	10	38	0.00410004	0.00608292	0.672683	0.265691	0.954965	0.621124	0.193022	0.874542	FALSE
772	Symptoms of the muscles	symptoms	24	109	0.0098401	0.0174484	0.559622	0.0104671	0.135892	0.590881	0.0228038	0.247069	FALSE
788	Syncope and collapse	symptoms	36	107	0.0147601	0.0171282	0.859673	0.436151	0.975999	0.83696	0.371796	0.999999	FALSE
727.1	Synovitis and tenosynovitis	musculoskeletal	38	162	0.0155802	0.0259324	0.59448	0.00423806	0.0678991	0.592741	0.004845	0.0729657	FALSE
695.42	Systemic lupus erythematosus	dermatologic	11	29	0.00451005	0.00464223	0.971397	0.934832	0.975999	0.963691	0.919099	0.999999	FALSE
427.7	Tachycardia NOS	circulatory system	45	181	0.0184502	0.0289739	0.629959	0.00604249	0.0874999	0.667969	0.0188874	0.218803	FALSE
306.9	Tension headache	mental disorders	12	35	0.00492005	0.00560269	0.877556	0.696939	0.975999	0.993264	0.984265	0.999999	FALSE
763	Thoracic or lumbosacral neuritis or radiculitis, unspecified	symptoms	22	41	0.00902009	0.00656315	1.37776	0.227197	0.912424	1.38654	0.235901	0.942351	FALSE
636.1	Threatened premature labor	pregnancy complications	36	68	0.0147601	0.0108852	1.36131	0.13717	0.728225	1.29254	0.226473	0.929343	FALSE
287.3	Thrombocytopenia	hematopoietic	34	225	0.0139401	0.0360173	0.378375	1.63133e-07	4.5496e-06	0.379803	2.87009e-07	7.71849e-06	FALSE
193	Thyroid cancer	neoplasms	13	28	0.00533005	0.00448215	1.19019	0.604831	0.975999	1.08641	0.811847	0.999999	FALSE
242	Thyrotoxicosis with or without goiter	endocrine/metabolic	26	83	0.0106601	0.0132864	0.800204	0.324067	0.975999	0.735722	0.185244	0.866987	FALSE
389.4	Tinnitus	sense organs	24	45	0.0098401	0.00720346	1.36966	0.215368	0.89598	1.34362	0.255497	0.96753	FALSE
318	Tobacco use disorder	mental disorders	40	99	0.0164002	0.0158476	1.03545	0.853689	0.975999	0.954891	0.811732	0.999999	FALSE
291.1	Transient mental disorders due to conditions classified elsewhere	mental disorders	15	96	0.00615006	0.0153674	0.396491	0.000901218	0.0169654	0.380943	0.000655269	0.0124916	FALSE
250.1	Type 1 diabetes	endocrine/metabolic	11	27	0.00451005	0.00432207	1.04369	0.905055	0.975999	1.19901	0.620846	0.999999	FALSE
250.2	Type 2 diabetes	endocrine/metabolic	41	138	0.0168102	0.0220906	0.756878	0.120686	0.697678	0.694731	0.0495474	0.438932	FALSE
555.2	Ulcerative colitis	digestive	11	39	0.00451005	0.006243	0.721159	0.339484	0.975999	0.716111	0.33888	0.999999	FALSE
663	Umbilical cord complications during labor and delivery	pregnancy complications	146	1285	0.0598606	0.205699	0.245868	9.84324e-54	9.26495e-52	0.257025	2.88828e-49	2.41653e-47	FALSE
550.4	Umbilical hernia	digestive	11	36	0.00451005	0.00576277	0.781633	0.475591	0.975999	0.740671	0.398893	0.999999	FALSE
599.4	Urinary incontinence	genitourinary	35	209	0.0143501	0.0334561	0.420611	2.58751e-06	6.38817e-05	0.400656	1.0497e-06	2.67941e-05	FALSE
591	Urinary tract infection	genitourinary	96	255	0.0393604	0.0408196	0.962788	0.756303	0.975999	0.962065	0.75757	0.999999	FALSE
947	Urticaria	dermatologic	28	106	0.0114801	0.0169681	0.672813	0.0638485	0.485161	0.702818	0.106303	0.669843	FALSE
218.1	Uterine leiomyoma	neoplasms	304	687	0.124641	0.109973	1.15237	0.0534598	0.457446	0.999593	0.995751	0.999999	FALSE
614.52	Vaginitis and vulvovaginitis	genitourinary	103	189	0.0422304	0.0302545	1.41329	0.00560183	0.0819064	1.40804	0.00795826	0.110974	FALSE
454.1	Varicose veins of lower extremity	circulatory system	17	20	0.00697007	0.00320154	2.18536	0.0180959	0.21126	2.19043	0.0215783	0.237204	FALSE
671	Venous/cerebrovascular complications embolism in pregnancy and the puerperium	pregnancy complications	103	638	0.0422304	0.102129	0.387641	3.5071e-18	1.50905e-16	0.386948	1.09818e-17	5.0117e-16	FALSE
70.2	Viral hepatitis B	infectious diseases	12	56	0.00492005	0.0089643	0.546618	0.0583044	0.46357	0.557386	0.0736192	0.540831	FALSE
79	Viral infection	infectious diseases	42	107	0.0172202	0.0171282	1.00546	0.976339	0.983505	0.996719	0.986072	0.999999	FALSE
78	Viral warts & HPV	infectious diseases	74	171	0.0303403	0.0273731	1.11179	0.453085	0.975999	1.06106	0.68296	0.999999	FALSE
79.9	Viremia, NOS	infectious diseases	16	36	0.00656007	0.00576277	1.13927	0.665323	0.975999	1.06814	0.831735	0.999999	FALSE
368	Visual disturbances	sense organs	31	103	0.0127101	0.0164879	0.767926	0.200469	0.857689	0.728591	0.134463	0.75901	FALSE
261.4	Vitamin D deficiency	endocrine/metabolic	84	159	0.0344403	0.0254522	1.36573	0.0229494	0.252276	1.28361	0.0772856	0.554248	FALSE
473.4	Voice disturbance	respiratory	12	27	0.00492005	0.00432207	1.13904	0.708151	0.975999	1.18051	0.641122	0.999999	FALSE
512.1	Wheezing	respiratory	16	30	0.00656007	0.00480231	1.36844	0.312383	0.975999	1.36409	0.329003	0.999999	FALSE
550	Abdominal hernia	digestive											TRUE
790.9	Abnormal arterial blood gases	symptoms											TRUE
512.3	Abnormal chest sounds	respiratory											TRUE
286.9	Abnormal coagulation profile	hematopoietic											TRUE
564.8	Abnormal findings on exam of gastrointestinal tract/ abdominal area	digestive											TRUE
611	Abnormal findings on mammogram or breast exam	genitourinary											TRUE
346	Abnormal findings on study of brain and/or nervous system	neurological											TRUE
429.2	Abnormal function study of cardiovascular system	circulatory system											TRUE
781.2	Abnormal posture	symptoms											TRUE
350.5	Abnormal reflex	neurological											TRUE
589	Abnormal results of function study of kidney	genitourinary											TRUE
573.7	Abnormal results of function study of liver	digestive											TRUE
514.1	Abnormal results of function study of pulmonary system	respiratory											TRUE
794	Abnormal results of other function studies (bladder, pancreas, placenta, spleen, etc)	symptoms											TRUE
516	Abnormal sputum	respiratory											TRUE
289.9	Abnormality of red blood cells	hematopoietic											TRUE
614.54	Abscess or ulceration of vulva	genitourinary											TRUE
276.4	Acid-base balance disorder	endocrine/metabolic											TRUE
276.41	Acidosis	endocrine/metabolic											TRUE
175	Acquired absence of breast	neoplasms											TRUE
701.6	Acquired acanthosis nigricans	dermatologic											TRUE
286.4	Acquired coagulation factor deficiency	hematopoietic											TRUE
736.2	Acquired deformities of finger	musculoskeletal											TRUE
736.3	Acquired deformities of hip	musculoskeletal											TRUE
735	Acquired foot deformities	musculoskeletal											TRUE
283	Acquired hemolytic anemias	hematopoietic											TRUE
738.4	Acquired spondylolisthesis	musculoskeletal											TRUE
735.2	Acquired toe deformities	musculoskeletal											TRUE
573.4	Acute and subacute necrosis of liver	digestive											TRUE
540.11	Acute appendicitis	digestive											TRUE
498	Acute bronchospasm	respiratory											TRUE
938.1	Acute dermatitis due to solar radiation	dermatologic											TRUE
446.2	Acute febrile mucocutaneous lymph node syndrome (Kawasaki disease)	circulatory system											TRUE
535.1	Acute gastritis	digestive											TRUE
614.31	Acute inflammatory pelvic disease	genitourinary											TRUE
465.4	Acute laryngitis and tracheitis	respiratory											TRUE
710.11	Acute osteomyelitis	musculoskeletal											TRUE
577.1	Acute pancreatitis	digestive											TRUE
420.21	Acute pericarditis	circulatory system											TRUE
523.31	Acute periodontitis	digestive											TRUE
394.4	Acute rheumatic heart disease	circulatory system											TRUE
474.1	Acute tonsillitis	respiratory											TRUE
441.1	Acute vascular insufficiency of intestine	circulatory system											TRUE
255.1	Adrenal hyperfunction	endocrine/metabolic											TRUE
255.3	Adrenogenital disorders	endocrine/metabolic											TRUE
260.3	Adult failure to thrive	endocrine/metabolic											TRUE
979	Adverse drug events and drug allergies	injuries & poisonings											TRUE
967	Adverse effects of sedatives or other central nervous system depressants and anesthetics	injuries & poisonings											TRUE
941	Adverse reaction to serum or vaccine	injuries & poisonings											TRUE
317	Alcohol-related disorders	mental disorders											TRUE
317.11	Alcoholic liver damage	mental disorders											TRUE
317.1	Alcoholism	mental disorders											TRUE
276.42	Alkalosis	endocrine/metabolic											TRUE
371.21	Allergic conjunctivitis	sense organs											TRUE
287.2	Allergic purpura	hematopoietic											TRUE
930	Allergic reaction to food	injuries & poisonings											TRUE
704.11	Alopecia Areata	dermatologic											TRUE
291.8	Alteration of consciousness	mental disorders											TRUE
292.4	Altered mental status	mental disorders											TRUE
368.1	Amblyopia	sense organs											TRUE
270.33	Amyloidosis	endocrine/metabolic											TRUE
565.1	Anal and rectal polyp	digestive											TRUE
946	Anaphylactic shock NOS	injuries & poisonings											TRUE
285.21	Anemia in chronic kidney disease	hematopoietic											TRUE
285.22	Anemia in neoplastic disease	hematopoietic											TRUE
285.2	Anemia of chronic disease	hematopoietic											TRUE
411.41	Aneurysm and dissection of heart	circulatory system											TRUE
442.8	Aneurysm of other specified artery	circulatory system											TRUE
411.3	Angina pectoris	circulatory system											TRUE
368.3	Anisometropia	sense organs											TRUE
715.2	Ankylosing spondylitis	musculoskeletal											TRUE
741.1	Ankylosis of joint	musculoskeletal											TRUE
759.1	Anomalies of endocrine glands, congenital	congenital anomalies											TRUE
526.3	Anomalies of jaw size/symmetry	digestive											TRUE
379.4	Anomalies of pupillary function	sense organs											TRUE
748	Anomalies of respiratory system, congenital	congenital anomalies											TRUE
524.3	Anomalies of tooth position/malocclusion	digestive											TRUE
426.4	Anomalous atrioventricular excitation	circulatory system											TRUE
260.6	Anorexia	endocrine/metabolic											TRUE
305.21	Anorexia nervosa	mental disorders											TRUE
334.2	Anterior horn cell disease	neurological											TRUE
253.4	Anterior pituitary disorders	endocrine/metabolic											TRUE
964.1	Anticoagulants causing adverse effects	injuries & poisonings											TRUE
963.1	Antineoplastic and immunosuppressive drugs causing adverse effects	injuries & poisonings											TRUE
301.2	Antisocial/borderline personality disorder	mental disorders											TRUE
300	Anxiety disorders	mental disorders											TRUE
442.1	Aortic aneurysm	circulatory system											TRUE
447.7	Aortic ectasia	circulatory system											TRUE
394.3	Aortic valve disease	circulatory system											TRUE
379.3	Aphakia and other disorders of lens	sense organs											TRUE
292.11	Aphasia	mental disorders											TRUE
292.1	Aphasia/speech disturbance	mental disorders											TRUE
284	Aplastic anemia	hematopoietic											TRUE
540	Appendiceal conditions	digestive											TRUE
540.1	Appendicitis	digestive											TRUE
442.4	Arterial dissection	circulatory system											TRUE
444	Arterial embolism and thrombosis	circulatory system											TRUE
444.1	Arterial embolism and thrombosis of lower extremity artery	circulatory system											TRUE
446.9	Arteritis NOS	circulatory system											TRUE
526.42	Arthralgia/ankylosis of temporomandibular joint	digestive											TRUE
713.5	Arthropathy associated with neurological disorders	musculoskeletal											TRUE
713	Arthropathy associated with other disorders classified elsewhere	musculoskeletal											TRUE
716.9	Arthropathy NOS	musculoskeletal											TRUE
133	Arthropod-borne diseases	infectious diseases											TRUE
742.8	Articular cartilage disorder	musculoskeletal											TRUE
572	Ascites (non malignant)	digestive											TRUE
733.4	Aseptic necrosis of bone	musculoskeletal											TRUE
117.4	Aspergillosis	infectious diseases											TRUE
1013	Asphyxia and hypoxemia	NULL											TRUE
440.9	Atherosclerosis of aorta	circulatory system											TRUE
440.22	Atherosclerosis of native arteries of the extremities with intermittent claudication	circulatory system											TRUE
440.2	Atherosclerosis of the extremities	circulatory system											TRUE
427.21	Atrial fibrillation	circulatory system											TRUE
427.22	Atrial flutter	circulatory system											TRUE
426.2	Atrioventricular [AV] block	circulatory system											TRUE
426.24	Atrioventricular block, complete	circulatory system											TRUE
624.2	Atrophy of female genital tract	genitourinary											TRUE
313.3	Autism	mental disorders											TRUE
279.2	Autoimmune disease NEC	endocrine/metabolic											TRUE
283.1	Autoimmune hemolytic anemias	hematopoietic											TRUE
609.11	Azoospermia and oligospermia	genitourinary											TRUE
38.3	Bacteremia	infectious diseases											TRUE
8.5	Bacterial enteritis	infectious diseases											TRUE
480.1	Bacterial pneumonia	respiratory											TRUE
539	Bariatric surgery	digestive											TRUE
530.13	Barrett's esophagus	digestive											TRUE
172.21	Basal cell carcinoma	neoplasms											TRUE
711.3	Behcet's syndrome	musculoskeletal											TRUE
227.1	Benign neoplasm of adrenal gland	neoplasms											TRUE
213	Benign neoplasm of bone and articular cartilage	neoplasms											TRUE
225.1	Benign neoplasm of brain, cranial nerves, meninges	neoplasms											TRUE
224	Benign neoplasm of eye	neoplasms											TRUE
224.1	Benign neoplasm of eye, uveal	neoplasms											TRUE
223	Benign neoplasm of kidney and other urinary organs	neoplasms											TRUE
210	Benign neoplasm of lip, oral cavity, and pharynx	neoplasms											TRUE
229.1	Benign neoplasm of lymph nodes	neoplasms											TRUE
221	Benign neoplasm of other female genital organs	neoplasms											TRUE
211	Benign neoplasm of other parts of digestive system	neoplasms											TRUE
227.2	Benign neoplasm of parathyroid gland	neoplasms											TRUE
212	Benign neoplasm of respiratory and intrathoracic organs	neoplasms											TRUE
225.2	Benign neoplasm of spinal cord, meninges	neoplasms											TRUE
226	Benign neoplasm of thyroid glands	neoplasms											TRUE
229	Benign neoplasm of unspecified sites	neoplasms											TRUE
596.1	Bladder neck obstruction	genitourinary											TRUE
911	Blister	injuries & poisonings											TRUE
170.1	Bone cancer	neoplasms											TRUE
860	Bone marrow or stem cell transplant	neoplasms											TRUE
174.1	Breast cancer [female]	neoplasms											TRUE
612	Breast conditions, congenital or relating to hormones	genitourinary											TRUE
613.9	Breast disorder NOS	genitourinary											TRUE
873	Broken tooth	injuries & poisonings											TRUE
496.3	Bronchiectasis	respiratory											TRUE
480.5	Bronchopneumonia and lung abscess	respiratory											TRUE
426.3	Bundle branch block	circulatory system											TRUE
1000	Burns	NULL											TRUE
726.3	Bursitis	musculoskeletal											TRUE
727.2	Bursitis disorders	musculoskeletal											TRUE
260.1	Cachexia	endocrine/metabolic											TRUE
726.4	Calcaneal spur; Exostosis NOS	musculoskeletal											TRUE
574.2	Calculus of bile duct	digestive											TRUE
594.2	Calculus of lower urinary tract	genitourinary											TRUE
594.3	Calculus of ureter	genitourinary											TRUE
189.2	Cancer of bladder	neoplasms											TRUE
191.11	Cancer of brain	neoplasms											TRUE
191.1	Cancer of brain and nervous system	neoplasms											TRUE
165.1	Cancer of bronchus; lung	neoplasms											TRUE
170.2	Cancer of connective tissue	neoplasms											TRUE
190	Cancer of eye	neoplasms											TRUE
164	Cancer of intrathoracic organs	neoplasms											TRUE
145.3	Cancer of major salivary glands	neoplasms											TRUE
194	Cancer of other endocrine glands	neoplasms											TRUE
184	Cancer of other female genital organs	neoplasms											TRUE
184.2	Cancer of other female genital organs (excluding uterus and ovary)	neoplasms											TRUE
151	Cancer of stomach	neoplasms											TRUE
145.2	Cancer of tongue	neoplasms											TRUE
195	Cancer, suspected or other	neoplasms											TRUE
112.3	Candidiasis of skin and nails	infectious diseases											TRUE
172.3	Carcinoma in situ of skin	neoplasms											TRUE
747	Cardiac and circulatory congenital anomalies	congenital anomalies											TRUE
427.42	Cardiac arrest	circulatory system											TRUE
429.9	Cardiac complications, not elsewhere classified	circulatory system											TRUE
426	Cardiac conduction disorders	circulatory system											TRUE
747.1	Cardiac congenital anomalies	congenital anomalies											TRUE
426.91	Cardiac pacemaker in situ	circulatory system											TRUE
747.11	Cardiac shunt/ heart septal defect	congenital anomalies											TRUE
797.1	Cardiogenic shock	symptoms											TRUE
416	Cardiomegaly	circulatory system											TRUE
277.8	Carnitine deficiencies	endocrine/metabolic											TRUE
347	Cataplexy and narcolepsy	neurological											TRUE
366	Cataract	sense organs											TRUE
557.1	Celiac disease	digestive											TRUE
681.3	Cellulitis and abscess of arm/hand	dermatologic											TRUE
681.2	Cellulitis and abscess of face/neck	dermatologic											TRUE
681.1	Cellulitis and abscess of fingers/toes	dermatologic											TRUE
681.6	Cellulitis and abscess of foot, toe	dermatologic											TRUE
681.5	Cellulitis and abscess of leg, except foot	dermatologic											TRUE
528.3	Cellulitis and abscess of oral soft tissues	digestive											TRUE
681.7	Cellulitis and abscess of trunk	dermatologic											TRUE
386.21	Central origin vertigo	sense organs											TRUE
327.31	Central/nonobstroctive sleep apnea	neurological											TRUE
433.5	Cerebral aneurysm	circulatory system											TRUE
433.21	Cerebral artery occlusion, with cerebral infarction	circulatory system											TRUE
348.4	Cerebral cysts	neurological											TRUE
348.2	Cerebral edema and compression of brain	neurological											TRUE
433.3	Cerebral ischemia	circulatory system											TRUE
816	Cerebral laceration and contusion	injuries & poisonings											TRUE
433	Cerebrovascular disease	circulatory system											TRUE
958	Certain early complications of trauma or procedure	injuries & poisonings											TRUE
180.1	Cervical cancer	neoplasms											TRUE
687.3	Changes in skin texture	dermatologic											TRUE
575.1	Cholangitis	digestive											TRUE
574.3	Cholecystitis without cholelithiasis	digestive											TRUE
574.11	Cholelithiasis with acute cholecystitis	digestive											TRUE
574.12	Cholelithiasis with other cholecystitis	digestive											TRUE
575.6	Cholesterolosis of gallbladder	digestive											TRUE
274.21	Chondrocalcinosis	endocrine/metabolic											TRUE
363	Chorioretinal inflammations, scars, and other disorders of choroid	sense organs											TRUE
363.3	Chorioretinal scars	sense organs											TRUE
758	Chromosomal anomalies and genetic disorders	congenital anomalies											TRUE
496	Chronic airway obstruction	respiratory											TRUE
496.2	Chronic bronchitis	respiratory											TRUE
592.12	Chronic cystitis	genitourinary											TRUE
798.1	Chronic fatigue syndrome	symptoms											TRUE
580.14	Chronic glomerulonephritis, NOS	genitourinary											TRUE
81.12	Chronic graft-versus-host disease	infectious diseases											TRUE
70.4	Chronic hepatitis	infectious diseases											TRUE
371.9	Chronic inflammatory disorders of orbit	sense organs											TRUE
592.13	Chronic interstitial cystitis	genitourinary											TRUE
585.4	Chronic kidney disease, Stage I or II	genitourinary											TRUE
585.33	Chronic Kidney Disease, Stage III	genitourinary											TRUE
585.34	Chronic Kidney Disease, Stage IV	genitourinary											TRUE
495.1	Chronic obstructive asthma	respiratory											TRUE
710.12	Chronic osteomyelitis	musculoskeletal											TRUE
355.1	Chronic pain syndrome	neurological											TRUE
577.2	Chronic pancreatitis	digestive											TRUE
573.1	Chronic passive congestion of liver	digestive											TRUE
420.22	Chronic pericarditis	circulatory system											TRUE
415.2	Chronic pulmonary heart disease	circulatory system											TRUE
585.3	Chronic renal failure [CKD]	genitourinary											TRUE
245.2	Chronic thyroiditis	endocrine/metabolic											TRUE
707.2	Chronic ulcer of leg or foot	dermatologic											TRUE
707.3	Chronic ulcer of unspecified site	dermatologic											TRUE
456	Chronic venous insufficiency [CVI]	circulatory system											TRUE
327.6	Circadian rhythm sleep disorder	neurological											TRUE
459.9	Circulatory disease NEC	circulatory system											TRUE
701.3	Circumscribed scleroderma	dermatologic											TRUE
571.51	Cirrhosis of liver without mention of alcohol	digestive											TRUE
735.22	Claw toe (acquired)	musculoskeletal											TRUE
749.1	Cleft palate	congenital anomalies											TRUE
803.21	Colles' fracture	injuries & poisonings											TRUE
153.2	Colon cancer	neoplasms											TRUE
368.5	Color vision deficiencies	sense organs											TRUE
153	Colorectal cancer	neoplasms											TRUE
348.7	Coma	neurological											TRUE
355	Complex regional/central pain syndrome	neurological											TRUE
859	Complication due to other implant and internal device	injuries & poisonings											TRUE
853	Complication of colostomy or enterostomy	injuries & poisonings											TRUE
858	Complication of internal orthopedic device	injuries & poisonings											TRUE
639	Complications following abortion or ectopic and molar pregnancies	pregnancy complications											TRUE
854	Complications of cardiac/vascular device, implant, and graft	injuries & poisonings											TRUE
536.7	Complications of gastrostomy, colostomy and enterostomy	digestive											TRUE
679	Complications of in utero procedures	pregnancy complications											TRUE
668	Complications of the administration of anesthetic or other sedation in labor and delivery	pregnancy complications											TRUE
851	Complications of transplants and reattached limbs	injuries & poisonings											TRUE
817	Concussion	injuries & poisonings											TRUE
656.7	Conditions involving the integument and temperature regulation of fetus and newborn	pregnancy complications											TRUE
312	Conduct disorders	mental disorders											TRUE
389.2	Conductive hearing loss	sense organs											TRUE
756.1	Congenital anomalies of abdominal wall; diaphram	congenital anomalies											TRUE
612.3	Congenital anomalies of breast	genitourinary											TRUE
749	Congenital anomalies of face and neck	congenital anomalies											TRUE
751.1	Congenital anomalies of genital organs	congenital anomalies											TRUE
747.13	Congenital anomalies of great vessels	congenital anomalies											TRUE
750.21	Congenital anomalies of intestine	congenital anomalies											TRUE
751.12	Congenital anomalies of male genital organs	congenital anomalies											TRUE
750.13	Congenital anomalies of mouth/tongue	congenital anomalies											TRUE
756.3	Congenital anomalies of muscle, tendon, fascia, and connective tissue	congenital anomalies											TRUE
747.2	Congenital anomalies of peripheral vascular system	congenital anomalies											TRUE
753.2	Congenital anomalies of posterior segment of eye	congenital anomalies											TRUE
691	Congenital anomalies of skin	dermatologic											TRUE
749.2	Congenital anomalies of skull and face bones	congenital anomalies											TRUE
750.15	Congenital anomalies of stomach	congenital anomalies											TRUE
753	Congenital anomalies of the eye	congenital anomalies											TRUE
757	Congenital anomalies of the integument	congenital anomalies											TRUE
755.4	Congenital anomalies of upper limb, including shoulder girdle	congenital anomalies											TRUE
751.2	Congenital anomalies of urinary system	congenital anomalies											TRUE
755.3	Congenital anomaly of fingers/toes	congenital anomalies											TRUE
750.22	Congenital anomaly of gallbladder, bile ducts, liver, pancreas	congenital anomalies											TRUE
753.1	Congenital cataract and lens anomalies	congenital anomalies											TRUE
286.1	Congenital coagulation defects	hematopoietic											TRUE
286.12	Congenital deficiency of other clotting factors (including factor VII)	hematopoietic											TRUE
755.1	Congenital deformities of feet	congenital anomalies											TRUE
286.13	Congenital factor VIII disorder	hematopoietic											TRUE
755.61	Congenital hip dysplasia and deformity	congenital anomalies											TRUE
244.5	Congenital hypothyroidism	endocrine/metabolic											TRUE
754	Congenital musculoskeletal deformities of spine	congenital anomalies											TRUE
756.5	Congenital osteodystrophies	congenital anomalies											TRUE
691.3	Congenital pigmentary anomalies of skin	dermatologic											TRUE
428.1	Congestive heart failure (CHF) NOS	circulatory system											TRUE
371.2	Conjunctivitis, noninfectious	sense organs											TRUE
284.2	Constitutional aplastic anemia	hematopoietic											TRUE
939.1	Contact and allergic dermatitis of eyelid	dermatologic											TRUE
931	Contact dermatitis and other eczema due to plants [except food]	dermatologic											TRUE
739	Contracture of joint	musculoskeletal											TRUE
728.71	Contracture of palmar fascia [Dupuytren's disease]	musculoskeletal											TRUE
727.7	Contracture of tendon (sheath)	musculoskeletal											TRUE
345.3	Convulsions	neurological											TRUE
364.9	Cornea replaced by transplant	sense organs											TRUE
364.4	Corneal degenerations	sense organs											TRUE
364.5	Corneal dystrophy	sense organs											TRUE
364.2	Corneal edema	sense organs											TRUE
364.1	Corneal opacity	sense organs											TRUE
364	Corneal opacity and other disorders of cornea	sense organs											TRUE
370.1	Corneal ulcer	sense organs											TRUE
700	Corns and callosities	dermatologic											TRUE
733.6	Costochondritis	musculoskeletal											TRUE
771.2	Cramp of limb	symptoms											TRUE
1006	Crushing injury	NULL											TRUE
1008	Crushing or internal injury to organs	NULL											TRUE
737	Curvature of spine	musculoskeletal											TRUE
255.11	Cushing's syndrome	endocrine/metabolic											TRUE
695.41	Cutaneous lupus erythematosus	dermatologic											TRUE
577.3	Cyst and pseudocyst of pancreas	digestive											TRUE
733.2	Cyst of bone	musculoskeletal											TRUE
586.2	Cyst of kidney, acquired	genitourinary											TRUE
614.53	Cyst or abscess of Bartholin's gland	genitourinary											TRUE
499	Cystic fibrosis	respiratory											TRUE
751.21	Cystic kidney disease	congenital anomalies											TRUE
592.1	Cystitis	genitourinary											TRUE
362.23	Cystoid macular degeneration of retina	sense organs											TRUE
526.1	Cysts of the jaws	digestive											TRUE
302.1	Decreased libido	mental disorders											TRUE
288.1	Decreased white blood cell count	hematopoietic											TRUE
707.1	Decubitus ulcer	dermatologic											TRUE
286.6	Defibrination syndrome	hematopoietic											TRUE
281.9	Deficiency anemias	hematopoietic											TRUE
279.11	Deficiency of humoral immunity	endocrine/metabolic											TRUE
389.3	Degenerative and vascular disorders of ear	sense organs											TRUE
334	Degenerative disease of the spinal cord	neurological											TRUE
702	Degenerative skin conditions and other dermatoses	dermatologic											TRUE
259.3	Delay in sexual development and puberty NEC	endocrine/metabolic											TRUE
290	Delirium dementia and amnestic and other cognitive disorders	mental disorders											TRUE
290.2	Delirium due to conditions classified elsewhere	mental disorders											TRUE
521.2	Dental abrasion, erosion and attrition	digestive											TRUE
521.1	Dental caries	digestive											TRUE
509.8	Dependence on respirator [Ventilator] or supplemental oxygen	respiratory											TRUE
938	Dermatitis due to solar radiation	dermatologic											TRUE
695.21	Dermatitis herpetiformis	dermatologic											TRUE
709.5	Dermatomyositis	dermatologic											TRUE
110.1	Dermatophytosis	infectious diseases											TRUE
110.13	Dermatophytosis of the body	infectious diseases											TRUE
315	Develomental delays and disorders	mental disorders											TRUE
253.3	Diabetes insipidus	endocrine/metabolic											TRUE
250	Diabetes mellitus	endocrine/metabolic											TRUE
250.7	Diabetic retinopathy	endocrine/metabolic											TRUE
741.3	Difficulty in walking	musculoskeletal											TRUE
368.2	Diplopia and disorders of binocular vision	sense organs											TRUE
448	Disease of capillaries	circulatory system											TRUE
394.7	Disease of tricuspid valve	circulatory system											TRUE
529	Diseases and other conditions of the tongue	digestive											TRUE
530	Diseases of esophagus	digestive											TRUE
521	Diseases of hard tissues of teeth	digestive											TRUE
577	Diseases of pancreas	digestive											TRUE
706	Diseases of sebaceous glands	dermatologic											TRUE
289.5	Diseases of spleen	hematopoietic											TRUE
526	Diseases of the jaws	digestive											TRUE
473	Diseases of the larynx and vocal cords	respiratory											TRUE
528	Diseases of the oral soft tissues, excluding lesions specific for gingiva and tongue	digestive											TRUE
254	Diseases of thymus gland	endocrine/metabolic											TRUE
288	Diseases of white blood cells	hematopoietic											TRUE
279	Disorders involving the immune mechanism	endocrine/metabolic											TRUE
368.7	Disorders of accommodation	sense organs											TRUE
389.5	Disorders of acoustic nerve	sense organs											TRUE
255	Disorders of adrenal glands	endocrine/metabolic											TRUE
270.2	Disorders of amino-acid metabolism	endocrine/metabolic											TRUE
277.4	Disorders of bilirubin excretion	endocrine/metabolic											TRUE
275.5	Disorders of calcium/phosphorus metabolism	endocrine/metabolic											TRUE
724.2	Disorders of coccyx	musculoskeletal											TRUE
372	Disorders of conjunctiva	sense organs											TRUE
275.2	Disorders of copper metabolism	endocrine/metabolic											TRUE
513.8	Disorders of diaphragm	respiratory											TRUE
530.5	Disorders of esophageal motility	digestive											TRUE
380	Disorders of external ear	sense organs											TRUE
379.5	Disorders of iris and ciliary body	sense organs											TRUE
275.1	Disorders of iron metabolism	hematopoietic											TRUE
375	Disorders of lacrimal system	sense organs											TRUE
275.3	Disorders of magnesium metabolism	endocrine/metabolic											TRUE
275	Disorders of mineral metabolism	endocrine/metabolic											TRUE
377	Disorders of optic nerve and visual pathways	sense organs											TRUE
352	Disorders of other cranial nerves	neurological											TRUE
252	Disorders of parathyroid gland	endocrine/metabolic											TRUE
275.53	Disorders of phosphorus metabolism	endocrine/metabolic											TRUE
270.3	Disorders of plasma protein metabolism	endocrine/metabolic											TRUE
367	Disorders of refraction and accommodation; blindness and low vision	sense organs											TRUE
724.1	Disorders of sacrum	musculoskeletal											TRUE
705	Disorders of sweat glands	dermatologic											TRUE
337	Disorders of the autonomic nervous system	neurological											TRUE
360	Disorders of the globe	sense organs											TRUE
376	Disorders of the orbit	sense organs											TRUE
253	Disorders of the pituitary gland and its hypothalamic control	endocrine/metabolic											TRUE
270.21	Disorders of urea cycle metabolism	endocrine/metabolic											TRUE
588	Disorders resulting from impaired renal function	genitourinary											TRUE
527.7	Disturbance of salivary secretion	digestive											TRUE
520.2	Disturbances in tooth eruption	digestive											TRUE
270.1	Disturbances of amino-acid transport	endocrine/metabolic											TRUE
350.6	Disturbances of sensation of smell and taste	neurological											TRUE
562.2	Diverticulitis	digestive											TRUE
562.1	Diverticulosis	digestive											TRUE
530.6	Diverticulum of esophagus, acquired	digestive											TRUE
362.27	Drusen (degenerative) of retina	sense organs											TRUE
531.3	Duodenal ulcer	digestive											TRUE
535.6	Duodenitis	digestive											TRUE
705.1	Dyshidrosis	dermatologic											TRUE
620	Dysplasia of female genital organs	genitourinary											TRUE
624.1	Dystrophy of female genital tract	genitourinary											TRUE
41.4	E. coli	infectious diseases											TRUE
305.2	Eating disorder	mental disorders											TRUE
634.3	Ectopic pregnancy	pregnancy complications											TRUE
374.1	Ectropion or entropion	sense organs											TRUE
1014	Effects of heat, cold and air pressure	NULL											TRUE
990	Effects radiation NOS	injuries & poisonings											TRUE
276.1	Electrolyte imbalance	endocrine/metabolic											TRUE
790.8	Elevated C-reactive protein (CRP)	symptoms											TRUE
795.82	Elevated cancer antigen 125 [CA 125]	symptoms											TRUE
790.1	Elevated sedimentation rate	symptoms											TRUE
444.2	Embolism and thrombosis of abdominal aorta	circulatory system											TRUE
496.1	Emphysema	respiratory											TRUE
506	Empyema and pneumothorax	respiratory											TRUE
323	Encephalitis	neurological											TRUE
323.8	Encephalitis, non-infectious	neurological											TRUE
348.8	Encephalopathy, not elsewhere classified	neurological											TRUE
585.32	End stage renal disease	genitourinary											TRUE
420.3	Endocarditis	circulatory system											TRUE
621	Endometrial hyperplasia	genitourinary											TRUE
288.3	Eosinophilia	hematopoietic											TRUE
530.15	Eosinophilic esophagitis	digestive											TRUE
345.1	Epilepsy	neurological											TRUE
375.2	Epiphora	sense organs											TRUE
605	Erectile dysfunction [ED]	genitourinary											TRUE
695.81	Erythema nodosum	dermatologic											TRUE
530.2	Esophageal bleeding (varices/hemorrhage)	digestive											TRUE
530.1	Esophagitis, GERD and related diseases	digestive											TRUE
333.1	Essential tremor	neurological											TRUE
242.3	Exophthalmos	endocrine/metabolic											TRUE
333	Extrapyramidal disease and abnormal movement disorders	neurological											TRUE
500.1	Extrinsic allergic alveolitis	respiratory											TRUE
369.2	Eye infection, viral	sense organs											TRUE
352.2	Facial nerve disorders [CN7]	neurological											TRUE
772.6	Facial weakness	symptoms											TRUE
264.2	Failure to thrive (childhood)	endocrine/metabolic											TRUE
610.2	Fibroadenosis of breast	genitourinary											TRUE
610.3	Fibrosclerosis of breast	genitourinary											TRUE
426.21	First degree AV block	circulatory system											TRUE
735.1	Flat foot	musculoskeletal											TRUE
276.6	Fluid overload	endocrine/metabolic											TRUE
1001	Foreign body injury	NULL											TRUE
803.3	Fracture of clavicle or scapula	injuries & poisonings											TRUE
801.1	Fracture of foot	injuries & poisonings											TRUE
804	Fracture of hand or wrist	injuries & poisonings											TRUE
803.1	Fracture of humerus	injuries & poisonings											TRUE
800	Fracture of lower limb	injuries & poisonings											TRUE
800.1	Fracture of neck of femur	injuries & poisonings											TRUE
800.4	Fracture of patella	injuries & poisonings											TRUE
802	Fracture of pelvis	injuries & poisonings											TRUE
803.2	Fracture of radius and ulna	injuries & poisonings											TRUE
807	Fracture of ribs	injuries & poisonings											TRUE
800.3	Fracture of tibia and fibula	injuries & poisonings											TRUE
809	Fracture of unspecified bones	injuries & poisonings											TRUE
800.2	Fracture of unspecified part of femur	injuries & poisonings											TRUE
803	Fracture of upper limb	injuries & poisonings											TRUE
805	Fracture of vertebral column without mention of spinal cord injury	injuries & poisonings											TRUE
564	Functional digestive disorders	digestive											TRUE
612.1	Galactorrhea	genitourinary											TRUE
791	Gangrene	symptoms											TRUE
531.2	Gastric ulcer	digestive											TRUE
530.7	Gastroesophageal laceration-hemorrhage syndrome	digestive											TRUE
569.2	Gastrointestinal complications	digestive											TRUE
303.31	Gastrointestinal malfunction arising from mental factors	mental disorders											TRUE
536.3	Gastroparesis	digestive											TRUE
345.11	Generalized convulsive epilepsy	neurological											TRUE
736.4	Genu valgum or varum (acquired)	musculoskeletal											TRUE
523	Gingival and periodontal diseases	digestive											TRUE
523.1	Gingivitis	digestive											TRUE
365	Glaucoma	sense organs											TRUE
529.1	Glossitis	digestive											TRUE
529.6	Glossodynia	digestive											TRUE
255.21	Glucocorticoid deficiency	endocrine/metabolic											TRUE
250.5	Glycosuria or Acetonuria	endocrine/metabolic											TRUE
90.2	Gonococcal infections	infectious diseases											TRUE
274.1	Gout	endocrine/metabolic											TRUE
274.11	Gouty arthropathy	endocrine/metabolic											TRUE
81.1	Graft-versus-host disease	infectious diseases											TRUE
38.1	Gram negative septicemia	infectious diseases											TRUE
38.2	Gram positive septicemia	infectious diseases											TRUE
593.1	Gross hematuria	genitourinary											TRUE
41.8	H. pylori	infectious diseases											TRUE
292.6	Hallucinations	mental disorders											TRUE
735.23	Hallux rigidus	musculoskeletal											TRUE
735.21	Hammer toe (acquired)	musculoskeletal											TRUE
428.2	Heart failure NOS	circulatory system											TRUE
428.4	Heart failure with preserved EF [Diastolic heart failure]	circulatory system											TRUE
428.3	Heart failure with reduced EF [Systolic or combined heart failure]	circulatory system											TRUE
429.1	Heart transplant/surgery	circulatory system											TRUE
395	Heart valve disorders	circulatory system											TRUE
395.6	Heart valve replaced	circulatory system											TRUE
134	Helminthiases	infectious diseases											TRUE
578.1	Hematemesis	digestive											TRUE
656.5	Hematological disorders of newborn	pregnancy complications											TRUE
342	Hemiplegia	neurological											TRUE
285.8	Hemoglobinuria	hematopoietic											TRUE
516.1	Hemoptysis	respiratory											TRUE
635	Hemorrhage during pregnancy; childbirth and postpartum	pregnancy complications											TRUE
656.4	Hemorrhage of fetus or newborn	pregnancy complications											TRUE
578.9	Hemorrhage of gastrointestinal tract	digestive											TRUE
850	Hemorrhage or hematoma complicating a procedure	injuries & poisonings											TRUE
286.5	Hemorrhagic disorder due to intrinsic circulating anticoagulants	hematopoietic											TRUE
70.9	Hepatitis NOS	infectious diseases											TRUE
573.3	Hepatomegaly	digestive											TRUE
356	Hereditary and idiopathic peripheral neuropathy	neurological											TRUE
275.11	Hereditary hemochromatosis	hematopoietic											TRUE
362.7	Hereditary retinal dystrophies	sense organs											TRUE
53.1	Herpes zoster with nervous system complications	infectious diseases											TRUE
705.3	Hidradenitis	dermatologic											TRUE
71.1	HIV infection, symptomatic	infectious diseases											TRUE
201	Hodgkin's disease	neoplasms											TRUE
962.3	Hormones and synthetic substitutes causing adverse effects in therapeutic use	injuries & poisonings											TRUE
71	Human immunodeficiency virus [HIV] disease	infectious diseases											TRUE
603.1	Hydrocele	genitourinary											TRUE
331.1	Hydrocephalus	neurological											TRUE
275.6	Hypercalcemia	endocrine/metabolic											TRUE
272.14	Hyperchylomicronemia	endocrine/metabolic											TRUE
286.8	Hypercoagulable state	hematopoietic											TRUE
256.1	Hyperestrogenism	endocrine/metabolic											TRUE
272.12	Hyperglyceridemia	endocrine/metabolic											TRUE
276.11	Hyperosmolality and/or hypernatremia	endocrine/metabolic											TRUE
252.1	Hyperparathyroidism	endocrine/metabolic											TRUE
276.13	Hyperpotassemia	endocrine/metabolic											TRUE
446.3	Hypersensitivity angiitis	circulatory system											TRUE
327.1	Hypersomnia	neurological											TRUE
401.22	Hypertensive chronic kidney disease	circulatory system											TRUE
401.2	Hypertensive heart and/or renal disease	circulatory system											TRUE
401.21	Hypertensive heart disease	circulatory system											TRUE
425.11	Hypertrophic obstructive cardiomyopathy	circulatory system											TRUE
612.2	Hypertrophy of breast (Gynecomastia)	genitourinary											TRUE
513.4	Hyperventilation	respiratory											TRUE
275.51	Hypocalcemia	endocrine/metabolic											TRUE
251.1	Hypoglycemia	endocrine/metabolic											TRUE
252.2	Hypoparathyroidism	endocrine/metabolic											TRUE
458	Hypotension	circulatory system											TRUE
780	Hypothermia/Chills	symptoms											TRUE
258	Iatrogenic endocrine disorders	endocrine/metabolic											TRUE
458.2	Iatrogenic hypotension	circulatory system											TRUE
452.1	Iatrogenic pulmonary embolism and infarction	circulatory system											TRUE
691.1	Ichthyosis congenita	dermatologic											TRUE
504.1	Idiopathic fibrosing alveolitis	respiratory											TRUE
559	Ileostomy status	digestive											TRUE
279.1	Immunity deficiency	endocrine/metabolic											TRUE
560.2	Impaction of intestine	digestive											TRUE
686.2	Impetigo	dermatologic											TRUE
312.3	Impulse control disorder	mental disorders											TRUE
550.6	Incisional hernia	digestive											TRUE
343	Infantile cerebral palsy	neurological											TRUE
369	Infection of the eye	sense organs											TRUE
41.9	Infection with drug-resistant microorganisms	infectious diseases											TRUE
81	Infection/inflammation of internal prosthetic device; implant; and graft	infectious diseases											TRUE
79.2	Infectious mononucleosis	infectious diseases											TRUE
712	Infective connective tissue disorders	musculoskeletal											TRUE
609.1	Infertility, male	genitourinary											TRUE
132	Infestation (lice, mites)	infectious diseases											TRUE
357	Inflammatory and toxic neuropathy	neurological											TRUE
526.5	Inflammatory conditions of jaw	digestive											TRUE
614.5	Inflammatory disease of cervix, vagina, and vulva	genitourinary											TRUE
614	Inflammatory diseases of female pelvic organs	genitourinary											TRUE
942	Infusion and transfusion reaction	injuries & poisonings											TRUE
703.1	Ingrowing nail	dermatologic											TRUE
550.1	Inguinal hernia	digestive											TRUE
907	Injuries to the nervous system	injuries & poisonings											TRUE
1007	Injury to blood vessels	NULL											TRUE
722.7	Intervertebral disc disorder with myelopathy	musculoskeletal											TRUE
134.1	Intestinal helminthiases	infectious diseases											TRUE
8	Intestinal infection	infectious diseases											TRUE
8.52	Intestinal infection due to C. difficile	infectious diseases											TRUE
8.7	Intestinal infection due to protozoa	infectious diseases											TRUE
557	Intestinal malabsorption (non-celiac)	digestive											TRUE
430.2	Intracerebral hemorrhage	circulatory system											TRUE
430	Intracranial hemorrhage	circulatory system											TRUE
818	Intracranial hemorrhage (injury)	injuries & poisonings											TRUE
656.1	Isoimmunization of fetus or newborn	pregnancy complications											TRUE
573.5	Jaundice (not of newborn)	digestive											TRUE
732.1	Juvenile osteochondrosis	musculoskeletal											TRUE
701.4	Keloid scar	dermatologic											TRUE
370	Keratitis	sense organs											TRUE
370.3	Keratoconjunctivitis	sense organs											TRUE
364.41	Keratoconus	sense organs											TRUE
701.1	Keratoderma, acquired	dermatologic											TRUE
587	Kidney replaced by transpant	genitourinary											TRUE
737.1	Kyphosis (acquired)	musculoskeletal											TRUE
386.3	Labyrinthitis	sense organs											TRUE
350.3	Lack of coordination	neurological											TRUE
264.9	Lack of normal physiological development, unspecified	endocrine/metabolic											TRUE
374.2	Lagophthalmos	sense organs											TRUE
202.24	Large cell lymphoma	neoplasms											TRUE
1012	Late effect	NULL											TRUE
433.8	Late effects of cerebrovascular disease	circulatory system											TRUE
728.2	Laxity of ligament or hypermobility syndrome	musculoskeletal											TRUE
315.1	Learning disorder	mental disorders											TRUE
426.32	Left bundle branch block	circulatory system											TRUE
528.6	Leukoplakia of oral mucosa	digestive											TRUE
214	Lipoma	neoplasms											TRUE
277.51	Lipoprotein disorders	endocrine/metabolic											TRUE
571.8	Liver abscess and sequelae of chronic liver disease	digestive											TRUE
278.3	Localized adiposity	endocrine/metabolic											TRUE
742.1	Loose body in joint	musculoskeletal											TRUE
737.2	Lordosis (acquired)	musculoskeletal											TRUE
754.1	Lumbosacral spondylolysis, congenital	congenital anomalies											TRUE
500	Lung disease due to external agents	respiratory											TRUE
510.2	Lung transplant	respiratory											TRUE
130.1	Lyme disease	infectious diseases											TRUE
204.11	Lymphoid leukemia, acute	neoplasms											TRUE
204.12	Lymphoid leukemia, chronic	neoplasms											TRUE
362.29	Macular degeneration (senile) of retina NOS	sense organs											TRUE
362.26	Macular puckering of retina	sense organs											TRUE
189.21	Malignant neoplasm of bladder	neoplasms											TRUE
174.11	Malignant neoplasm of female breast	neoplasms											TRUE
189.11	Malignant neoplasm of kidney, except pelvis	neoplasms											TRUE
184.11	Malignant neoplasm of ovary	neoplasms											TRUE
153.3	Malignant neoplasm of rectum, rectosigmoid junction, and anus	neoplasms											TRUE
159.2	Malignant neoplasm of small intestine, including duodenum	neoplasms											TRUE
182	Malignant neoplasm of uterus	neoplasms											TRUE
195.1	Malignant neoplasm, other	neoplasms											TRUE
733.8	Malunion and nonunion of fracture	musculoskeletal											TRUE
611.11	Mammographic microcalcification	genitourinary											TRUE
191	Manlignant and unknown neoplasms of brain and nervous system	neoplasms											TRUE
381.3	Mastoiditis & related conditions	sense organs											TRUE
281.1	Megaloblastic anemia	hematopoietic											TRUE
172.11	Melanomas of skin	neoplasms											TRUE
292.3	Memory loss	mental disorders											TRUE
386.1	Meniere's disease	sense organs											TRUE
320	Meningitis	neurological											TRUE
315.3	Mental retardation	mental disorders											TRUE
41.12	Methicillin resistant Staphylococcus aureus	infectious diseases											TRUE
41.11	Methicillin sensitive Staphylococcus aureus	infectious diseases											TRUE
593.2	Microscopic hematuria	genitourinary											TRUE
292.2	Mild cognitive impairment	mental disorders											TRUE
634	Miscarriage; stillbirth	pregnancy complications											TRUE
634.1	Missed abortion/Hydatidiform mole	pregnancy complications											TRUE
394.2	Mitral valve disease	circulatory system											TRUE
394.1	Mitral valve stenosis and aortic valve stenosis	circulatory system											TRUE
626.21	Mittelschmerz	genitourinary											TRUE
272.13	Mixed hyperlipidemia	endocrine/metabolic											TRUE
433.32	Moyamoya disease	circulatory system											TRUE
480.13	MRSA pneumonia	respiratory											TRUE
204.4	Multiple myeloma	neoplasms											TRUE
772.3	Muscle weakness	symptoms											TRUE
359.1	Muscular dystrophies	neurological											TRUE
772.1	Muscular wasting and disuse atrophy	symptoms											TRUE
771	Musculoskeletal symptoms referable to limbs	symptoms											TRUE
358.1	Myasthenia gravis	neurological											TRUE
117	Mycoses	infectious diseases											TRUE
204.2	Myeloid leukemia	neoplasms											TRUE
204.21	Myeloid leukemia, acute	neoplasms											TRUE
204.22	Myeloid leukemia, chronic	neoplasms											TRUE
200	Myeloproliferative disease	neoplasms											TRUE
411.2	Myocardial infarction	circulatory system											TRUE
420.1	Myocarditis	circulatory system											TRUE
333.2	Myoclonus	neurological											TRUE
359.2	Myopathy	neurological											TRUE
384.1	Myringitis	sense organs											TRUE
471	Nasal polyps	respiratory											TRUE
174.3	Neoplasm of uncertain behavior of breast	neoplasms											TRUE
158	Neoplasm of unspecified nature of digestive system	neoplasms											TRUE
580.31	Nephritis and nephropathy in diseases classified elsewhere	genitourinary											TRUE
580.32	Nephritis and nephropathy with pathological lesion	genitourinary											TRUE
580.2	Nephrotic syndrome without mention of glomerulonephritis	genitourinary											TRUE
353.1	Nerve plexus lesions	neurological											TRUE
353	Nerve root and plexus disorders	neurological											TRUE
353.2	Nerve root lesions	neurological											TRUE
752	Nervous system congenital anomalies	congenital anomalies											TRUE
752.1	Neural tube defects	congenital anomalies											TRUE
209	Neuroendocrine tumors	neoplasms											TRUE
199.4	Neurofibromatosis	neoplasms											TRUE
292	Neurological disorders	mental disorders											TRUE
288.11	Neutropenia	hematopoietic											TRUE
202.21	Nodular lymphoma	neoplasms											TRUE
283.2	Non-autoimmune hemolytic anemias	hematopoietic											TRUE
875	Non-healing surgical wound	injuries & poisonings											TRUE
202.2	Non-Hodgkins lymphoma	neoplasms											TRUE
580.12	Non-proliferative glomerulonephritis	genitourinary											TRUE
769	Nonallopathic lesions NEC	symptoms											TRUE
371.33	Noninfectious dermatoses of eyelid	sense organs											TRUE
450	Noninfectious disorders of lymphatic channels	circulatory system											TRUE
395.2	Nonrheumatic aortic valve disorders	circulatory system											TRUE
395.4	Nonrheumatic pulmonary valve disorders	circulatory system											TRUE
395.3	Nonrheumatic tricuspid valve disorders	circulatory system											TRUE
366.1	Nonsenile Cataract	sense organs											TRUE
346.3	Nonspecific abnormal findings in cerebrospinal fluid	neurological											TRUE
575.9	Nonspecific abnormal findings on radiological and other examination of biliary tract	digestive											TRUE
346.1	Nonspecific abnormal findings on radiological and other examination of skull and head	neurological											TRUE
346.2	Nonspecific abnormal results of function study of brain and central nervous system	neurological											TRUE
573.6	Nonspecific elevation of levels of transaminase or lactic acid dehydrogenase [LDH]	digestive											TRUE
790	Nonspecific findings on examination of blood	symptoms											TRUE
729.7	Nontraumatic compartment syndrome	musculoskeletal											TRUE
260.22	Nutritional marasmus	endocrine/metabolic											TRUE
378.2	Nystagmus and other irregular eye movements	sense organs											TRUE
300.3	Obsessive-compulsive disorders	mental disorders											TRUE
751.3	Obstructive genitourinary defect	congenital anomalies											TRUE
433.1	Occlusion and stenosis of precerebral arteries	circulatory system											TRUE
433.2	Occlusion of cerebral arteries	circulatory system											TRUE
433.11	Occlusion of cerebral arteries, with cerebral infarction	circulatory system											TRUE
599.6	Oliguria and anuria	genitourinary											TRUE
870.2	Open wound of ear	injuries & poisonings											TRUE
871.2	Open wound of finger(s)	injuries & poisonings											TRUE
871.3	Open wound of foot except toe(s) alone	injuries & poisonings											TRUE
870.8	Open wound of genital organs	injuries & poisonings											TRUE
871.1	Open wound of hand except finger(s)	injuries & poisonings											TRUE
870.5	Open wound of lip and mouth	injuries & poisonings											TRUE
870.6	Open wound of neck	injuries & poisonings											TRUE
871.4	Open wound of toe(s)	injuries & poisonings											TRUE
870.1	Open wound or laceration of eye or eyelid	injuries & poisonings											TRUE
871	Open wounds of extremities	injuries & poisonings											TRUE
870	Open wounds of head; neck; and trunk	injuries & poisonings											TRUE
365.1	Open-angle glaucoma	sense organs											TRUE
377.1	Optic atrophy	sense organs											TRUE
377.3	Optic neuritis/neuropathy	sense organs											TRUE
528.12	Oral aphthae	digestive											TRUE
327.41	Organic or persistent insomnia	neurological											TRUE
513.32	Orthopnea	respiratory											TRUE
458.1	Orthostatic hypotension	circulatory system											TRUE
731	Osteitis deformans and osteopathies associated with other disorders classified elsewhere	musculoskeletal											TRUE
740.1	Osteoarthritis; localized	musculoskeletal											TRUE
740.3	Osteoarthrosis involving more than one site, but not specified as generalized	musculoskeletal											TRUE
740.11	Osteoarthrosis, localized, primary	musculoskeletal											TRUE
740.12	Osteoarthrosis, localized, secondary	musculoskeletal											TRUE
732.7	Osteochondritis dissecans	musculoskeletal											TRUE
732	Osteochondropathies	musculoskeletal											TRUE
743.11	Osteoporosis NOS	musculoskeletal											TRUE
736	Other acquired deformities of limbs	musculoskeletal											TRUE
738	Other acquired musculoskeletal deformity	musculoskeletal											TRUE
411.9	Other acute and subacute forms of ischemic heart disease	circulatory system											TRUE
721.8	Other allied disorders of spine	musculoskeletal											TRUE
504	Other alveolar and parietoalveolar pneumonopathy	respiratory											TRUE
759	Other and unspecified congenital anomalies	congenital anomalies											TRUE
722.9	Other and unspecified disc disorder	musculoskeletal											TRUE
349	Other and unspecified disorders of the nervous system	neurological											TRUE
442	Other aneurysm	circulatory system											TRUE
716	Other arthropathies	musculoskeletal											TRUE
218.2	Other benign neoplasm of uterus	neoplasms											TRUE
426.8	Other cardiac conduction disorders	circulatory system											TRUE
425.8	Other cardiomyopathy	circulatory system											TRUE
331	Other cerebral degenerations	neurological											TRUE
411.8	Other chronic ischemic heart disease, unspecified	circulatory system											TRUE
324	Other CNS infection and poliomyelitis	neurological											TRUE
348	Other conditions of brain	neurological											TRUE
348.9	Other conditions of brain, NOS	neurological											TRUE
755.6	Other congenital anomalies of lower limb, including pelvic girdle	congenital anomalies											TRUE
756	Other congenital musculoskeletal anomalies	congenital anomalies											TRUE
277.6	Other deficiencies of circulating enzymes	endocrine/metabolic											TRUE
281	Other deficiency anemia	hematopoietic											TRUE
341	Other demyelinating diseases of central nervous system	neurological											TRUE
289	Other diseases of blood and blood-forming organs	hematopoietic											TRUE
510	Other diseases of lung	respiratory											TRUE
519.8	Other diseases of respiratory system, NEC	respiratory											TRUE
525	Other diseases of the teeth and supporting structures	digestive											TRUE
447	Other disorders of arteries and arterioles	circulatory system											TRUE
575.8	Other disorders of biliary tract	digestive											TRUE
596	Other disorders of bladder	genitourinary											TRUE
271.9	Other disorders of carbohydrate transport and metabolism	endocrine/metabolic											TRUE
723	Other disorders of cervical region	musculoskeletal											TRUE
459	Other disorders of circulatory system	circulatory system											TRUE
379	Other disorders of eye	sense organs											TRUE
575.7	Other disorders of gallbladder	digestive											TRUE
569	Other disorders of intestine	digestive											TRUE
277.5	Other disorders of lipoid metabolism	endocrine/metabolic											TRUE
277	Other disorders of metabolism	endocrine/metabolic											TRUE
385	Other disorders of middle ear and mastoid	sense organs											TRUE
253.7	Other disorders of neurohypophysis	endocrine/metabolic											TRUE
251	Other disorders of pancreatic internal secretion	endocrine/metabolic											TRUE
727	Other disorders of synovium, tendon, and bursa	musculoskeletal											TRUE
384	Other disorders of tympanic membrane	sense organs											TRUE
597	Other disorders of urethra and urinary tract	genitourinary											TRUE
414	Other forms of chronic heart disease	circulatory system											TRUE
426.25	Other heart block	circulatory system											TRUE
282.9	Other hereditary hemolytic anemias	hematopoietic											TRUE
425.12	Other hypertrophic cardiomyopathy	circulatory system											TRUE
136	Other infectious and parasitic diseases	infectious diseases											TRUE
715	Other inflammatory spondylopathies	musculoskeletal											TRUE
560.4	Other intestinal obstruction	digestive											TRUE
306	Other mental disorder	mental disorders											TRUE
172.2	Other non-epithelial cancer of skin	neoplasms											TRUE
362.3	Other nondiabetic retinopathy	sense organs											TRUE
613	Other nonmalignant breast conditions	genitourinary											TRUE
263	Other nutritional deficiency	endocrine/metabolic											TRUE
870.3	Other open wound of head and face	injuries & poisonings											TRUE
344	Other paralytic syndromes	neurological											TRUE
290.3	Other persistent mental disorders due to conditions classified elsewhere	mental disorders											TRUE
505	Other pulmonary inflamation or edema	respiratory											TRUE
362	Other retinal disorders	sense organs											TRUE
610.8	Other specified benign mammary dysplasias	genitourinary											TRUE
751.22	Other specified congenital anomalies of kidney	congenital anomalies											TRUE
752.2	Other specified congenital anomalies of nervous system	congenital anomalies											TRUE
709.6	Other specified diffuse diseases of connective tissue	dermatologic											TRUE
527.8	Other specified diseases of the salivary glands	digestive											TRUE
270.38	Other specified disorders of plasma protein metabolism	endocrine/metabolic											TRUE
695.8	Other specified erythematous conditions	dermatologic											TRUE
535.8	Other specified gastritis	digestive											TRUE
743.13	Other specified osteoporosis	musculoskeletal											TRUE
443.8	Other specified peripheral vascular diseases	circulatory system											TRUE
842	Other sprains and strains	injuries & poisonings											TRUE
724.8	Other symptoms referable to back	musculoskeletal											TRUE
724.9	Other unspecified back disorders	musculoskeletal											TRUE
452	Other venous embolism and thrombosis	circulatory system											TRUE
281.12	Other vitamin B12 deficiency anemia	hematopoietic											TRUE
381.9	Otorrhea	sense organs											TRUE
383	Otosclerosis	sense organs											TRUE
278	Overweight, obesity and other hyperalimentation	endocrine/metabolic											TRUE
716.8	Palindromic rheumatism	musculoskeletal											TRUE
782.6	Pallor and flushing	symptoms											TRUE
157	Pancreatic cancer	neoplasms											TRUE
284.1	Pancytopenia	hematopoietic											TRUE
729.3	Panniculitis	musculoskeletal											TRUE
473.3	Paralysis/spasm of vocal cords or larynx	respiratory											TRUE
560.1	Paralytic ileus	digestive											TRUE
378.5	Paralytic strabismus	sense organs											TRUE
295.2	Paranoid disorders	mental disorders											TRUE
270.32	Paraproteinemia	endocrine/metabolic											TRUE
696.2	Parapsoriasis	dermatologic											TRUE
327.5	Parasomnia	neurological											TRUE
332	Parkinson's disease	neurological											TRUE
427.1	Paroxysmal tachycardia, unspecified	circulatory system											TRUE
427.12	Paroxysmal ventricular tachycardia	circulatory system											TRUE
345.12	Partial epilepsy	neurological											TRUE
743.2	Pathologic fracture	musculoskeletal											TRUE
743.22	Pathologic fracture of femur	musculoskeletal											TRUE
743.21	Pathologic fracture of vertebrae	musculoskeletal											TRUE
742.2	Pathological, developmental or recurrent dislocation	musculoskeletal											TRUE
756.2	Pectus and other congenital anomalies of ribs/sternum	congenital anomalies											TRUE
756.21	Pectus excavatum	congenital anomalies											TRUE
132.1	Pediculosis and phthirus infestation	infectious diseases											TRUE
614.3	Pelvic inflammatory disease (PID)	genitourinary											TRUE
614.33	Pelvic inflammatory disease, NOS	genitourinary											TRUE
695.22	Pemphigus and pemphigoid	dermatologic											TRUE
531.4	Peptic ulcer, site unspecified	digestive											TRUE
384.4	Perforation of tympanic membrane	sense organs											TRUE
522.5	Periapical abscess	digestive											TRUE
420.2	Pericarditis	circulatory system											TRUE
656.8	Perinatal jaundice	pregnancy complications											TRUE
337.1	Peripheral autonomic neuropathy	neurological											TRUE
362.6	Peripheral retinal degenerations	sense organs											TRUE
443.9	Peripheral vascular disease, unspecified	circulatory system											TRUE
560.3	Peritoneal or intestinal adhesions	digestive											TRUE
567	Peritonitis and retroperitoneal infections	digestive											TRUE
281.11	Pernicious anemia	hematopoietic											TRUE
789.1	Persistent vomiting	symptoms											TRUE
301	Personality disorders	mental disorders											TRUE
313	Pervasive developmental disorders	mental disorders											TRUE
270.12	Phenylketonuria [PKU]	endocrine/metabolic											TRUE
325	Phlebitis and thrombophlebitis of intracranial venous sinuses	neurological											TRUE
451.2	Phlebitis and thrombophlebitis of lower extremities	circulatory system											TRUE
686.3	Pilonidal cyst	dermatologic											TRUE
253.5	Pituitary dwarfism	endocrine/metabolic											TRUE
253.2	Pituitary hypofunction	endocrine/metabolic											TRUE
696.3	Pityriasis	dermatologic											TRUE
727.8	Plica syndrome	musculoskeletal											TRUE
480.11	Pneumococcal pneumonia	respiratory											TRUE
480.3	Pneumonia due to fungus (mycoses)	respiratory											TRUE
501	Pneumonitis due to inhalation of food or vomitus	respiratory											TRUE
965	Poisoning by analgesics, antipyretics, and antirheumatics	injuries & poisonings											TRUE
966	Poisoning by anticonvulsants and anti-Parkinsonism drugs	injuries & poisonings											TRUE
971	Poisoning by drugs primarily affecting the autonomic nervous system	injuries & poisonings											TRUE
961	Poisoning by other anti-infectives	injuries & poisonings											TRUE
963	Poisoning by primarily systemic agents	injuries & poisonings											TRUE
969	Poisoning by psychotropic agents	injuries & poisonings											TRUE
446.6	Polyarteritis nodosa	circulatory system											TRUE
270.31	Polyclonal hypergammaglobulinemia	endocrine/metabolic											TRUE
200.1	Polycythemia vera	neoplasms											TRUE
289.8	Polycythemia, secondary	hematopoietic											TRUE
276.8	Polydipsia	endocrine/metabolic											TRUE
717	Polymyalgia Rheumatica	musculoskeletal											TRUE
316.1	Polyneuropathy due to drugs	mental disorders											TRUE
250.6	Polyneuropathy in diabetes	endocrine/metabolic											TRUE
622	Polyp of female genital organs	genitourinary											TRUE
571.81	Portal hypertension	digestive											TRUE
258.1	Postablative ovarian failure	endocrine/metabolic											TRUE
502	Postinflammatory pulmonary fibrosis	respiratory											TRUE
722.8	Postlaminectomy syndrome	musculoskeletal											TRUE
627.3	Postmenopausal atrophic vaginitis	genitourinary											TRUE
627.1	Postmenopausal bleeding	genitourinary											TRUE
80	Postoperative infection	infectious diseases											TRUE
958.1	Postoperative shock	injuries & poisonings											TRUE
783.1	Postprocedural fever	symptoms											TRUE
876	Posttraumatic wound infection not elsewhere classified	injuries & poisonings											TRUE
418.1	Precordial pain	circulatory system											TRUE
627.4	Premenopausal menorrhagia	genitourinary											TRUE
367.4	Presbyopia	sense organs											TRUE
365.2	Primary angle-closure glaucoma	sense organs											TRUE
571.6	Primary biliary cirrhosis	digestive											TRUE
415.21	Primary pulmonary hypertension	circulatory system											TRUE
425.1	Primary/intrinsic cardiomyopathies	circulatory system											TRUE
360.2	Progressive myopia	sense organs											TRUE
580.11	Proliferative glomerulonephritis	genitourinary											TRUE
260	Protein-calorie malnutrition	endocrine/metabolic											TRUE
131	Protozoan infection	infectious diseases											TRUE
480.12	Pseudomonal pneumonia	respiratory											TRUE
696.4	Psoriasis	dermatologic											TRUE
696.42	Psoriatic arthropathy	dermatologic											TRUE
303.3	Psychogenic disorder	mental disorders											TRUE
368.91	Psychophysical visual disturbances	sense organs											TRUE
295.3	Psychosis	mental disorders											TRUE
374.3	Ptosis of eyelid	sense organs											TRUE
503	Pulmonary congestion and hypostasis	respiratory											TRUE
415.11	Pulmonary embolism and infarction, acute	circulatory system											TRUE
415	Pulmonary heart disease	circulatory system											TRUE
509.3	Pulmonary insufficiency or respiratory failure following trauma and surgery	respiratory											TRUE
522.1	Pulpitis and necrosis of tooth pulp	digestive											TRUE
287	Purpura and other hemorrhagic conditions	hematopoietic											TRUE
686.5	Pyoderma	dermatologic											TRUE
711.1	Pyogenic arthritis	musculoskeletal											TRUE
686.4	Pyogenic granuloma	dermatologic											TRUE
287.4	Qualitative platelet defects	hematopoietic											TRUE
530.14	Reflux esophagitis	digestive											TRUE
594.8	Renal colic	genitourinary											TRUE
585.2	Renal failure NOS	genitourinary											TRUE
580.4	Renal sclerosis, NOS	genitourinary											TRUE
513	Respiratory abnormalities	respiratory											TRUE
509.5	Respiratory arrest	respiratory											TRUE
519.2	Respiratory complications	respiratory											TRUE
509.1	Respiratory failure	respiratory											TRUE
509.2	Respiratory insufficiency	respiratory											TRUE
202.22	Reticulosarcoma	neoplasms											TRUE
361.1	Retinal detachment with retinal defect	sense organs											TRUE
361	Retinal detachments and defects	sense organs											TRUE
362.9	Retinal edema	sense organs											TRUE
362.8	Retinal hemorrhage/ischemia	sense organs											TRUE
362.4	Retinal vascular changes and abnomalities	sense organs											TRUE
362.1	Retinopathy of prematurity	sense organs											TRUE
772.4	Rhabdomyolysis	symptoms											TRUE
394	Rheumatic disease of the heart valves	circulatory system											TRUE
729.1	Rheumatism, unspecified and fibrositis	musculoskeletal											TRUE
714.1	Rheumatoid arthritis	musculoskeletal											TRUE
714	Rheumatoid arthritis and other inflammatory polyarthropathies	musculoskeletal											TRUE
261.41	Rickets or osteomalacia	endocrine/metabolic											TRUE
426.31	Right bundle branch block	circulatory system											TRUE
840.2	Rotator cuff (capsule) sprain	injuries & poisonings											TRUE
727.5	Rupture of synovium	musculoskeletal											TRUE
715.1	Sacroiliitis NEC	musculoskeletal											TRUE
697	Sarcoidosis	dermatologic											TRUE
301.1	Schizoid personality disorder	mental disorders											TRUE
295.1	Schizophrenia	mental disorders											TRUE
295	Schizophrenia and other psychotic disorders	mental disorders											TRUE
722.3	Schmorl's nodes	musculoskeletal											TRUE
379.1	Scleritis and episcleritis	sense organs											TRUE
706.3	Seborrhea	dermatologic											TRUE
426.23	Second degree AV block	circulatory system											TRUE
249	Secondary diabetes mellitus	endocrine/metabolic											TRUE
588.2	Secondary hyperparathyroidism (of renal origin)	genitourinary											TRUE
198.6	Secondary malignancy of bone	neoplasms											TRUE
198.5	Secondary malignancy of brain/spine	neoplasms											TRUE
198.1	Secondary malignancy of lymph nodes	neoplasms											TRUE
198.2	Secondary malignancy of respiratory organs	neoplasms											TRUE
198	Secondary malignant neoplasm	neoplasms											TRUE
198.3	Secondary malignant neoplasm of digestive systems	neoplasms											TRUE
198.4	Secondary malignant neoplasm of liver	neoplasms											TRUE
425.2	Secondary/extrinsic cardiomyopathies	circulatory system											TRUE
366.2	Senile cataract	sense organs											TRUE
362.31	Separation of retinal layers	sense organs											TRUE
994.2	Sepsis	injuries & poisonings											TRUE
994.21	Septic shock	injuries & poisonings											TRUE
38	Septicemia	infectious diseases											TRUE
260.2	severe protein-calorie malnutrition	endocrine/metabolic											TRUE
302	Sexual and gender identity disorders	mental disorders											TRUE
90	Sexually transmitted infections (not HIV or hepatitis)	infectious diseases											TRUE
797	Shock	symptoms											TRUE
527.2	Sialoadenitis	digestive											TRUE
528.7	Sialolithiasis	digestive											TRUE
282.5	Sickle cell anemia	hematopoietic											TRUE
427.8	Sinoatrial node dysfunction (Bradycardia)	circulatory system											TRUE
819	Skull and face fracture and other intercranial injury	injuries & poisonings											TRUE
327.3	Sleep apnea	neurological											TRUE
327.72	Sleep related leg cramps	neurological											TRUE
327.7	Sleep related movement disorders	neurological											TRUE
586.11	Small kidney	genitourinary											TRUE
514.2	Solitary pulmonary nodule	respiratory											TRUE
303.4	Somatoform disorder	mental disorders											TRUE
291.4	Specific nonpsychotic mental disorders due to brain damage	mental disorders											TRUE
315.2	Speech and language disorder	mental disorders											TRUE
752.11	Spina bifida	congenital anomalies											TRUE
952	Spinal cord injury without evidence of spinal bone injury	injuries & poisonings											TRUE
715.3	Spinal enthesopathy	musculoskeletal											TRUE
130	Spirochetal infection	infectious diseases											TRUE
579.2	Splenomegaly	digestive											TRUE
754.2	Spondylolisthesis, congenital	congenital anomalies											TRUE
721	Spondylosis and allied disorders	musculoskeletal											TRUE
721.2	Spondylosis with myelopathy	musculoskeletal											TRUE
287.1	Spontaneous ecchymoses	hematopoietic											TRUE
841	Sprains and strains of back and neck	injuries & poisonings											TRUE
172.22	Squamous cell carcinoma	neoplasms											TRUE
41.1	Staphylococcus infections	infectious diseases											TRUE
528.1	Stomatitis and mucositis	digestive											TRUE
528.11	Stomatitis and mucositis (ulcerative)	digestive											TRUE
378.1	Strabismus (not specified as paralytic)	sense organs											TRUE
378	Strabismus and other disorders of binocular eye movements	sense organs											TRUE
743.4	Stress fracture	musculoskeletal											TRUE
530.3	Stricture and stenosis of esophagus	digestive											TRUE
447.1	Stricture of artery	circulatory system											TRUE
586.4	Stricture/obstruction of ureter	genitourinary											TRUE
430.1	Subarachnoid hemorrhage	circulatory system											TRUE
1003	Sudden death	NULL											TRUE
297.1	Suicidal ideation	mental disorders											TRUE
297	Suicidal ideation or attempt	mental disorders											TRUE
297.2	Suicide or self-inflicted injury	mental disorders											TRUE
910	Superficial injury, infected	injuries & poisonings											TRUE
370.2	Superficial keratitis	sense organs											TRUE
427.61	Supraventricular premature beats	circulatory system											TRUE
293	Symptoms involving head and neck	mental disorders											TRUE
726.2	Synoviopathy	musculoskeletal											TRUE
994.1	Systemic inflammatory response syndrome (SIRS)	injuries & poisonings											TRUE
709.3	Systemic sclerosis	dermatologic											TRUE
446.7	Takayasu's disease	circulatory system											TRUE
704.12	Telogen effluvium	dermatologic											TRUE
526.41	Temporomandibular joint disorder, unspecified	digestive											TRUE
526.4	Temporomandibular joint disorders	digestive											TRUE
257.1	Testicular hypofunction	endocrine/metabolic											TRUE
478	Throat pain	respiratory											TRUE
446.1	Thromboangiitis obliterans	circulatory system											TRUE
446.8	Thrombotic microangiopathy	circulatory system											TRUE
246.2	Thyroid cyst	endocrine/metabolic											TRUE
245	Thyroiditis	endocrine/metabolic											TRUE
245.1	Thyroiditis, acute and subacute	endocrine/metabolic											TRUE
242.31	Thyrotoxic exophthalmos	endocrine/metabolic											TRUE
333.3	Tics and choreas	neurological											TRUE
313.2	Tics and stuttering	mental disorders											TRUE
333.4	Torsion dystonia	neurological											TRUE
723.1	Torticollis	musculoskeletal											TRUE
984	Toxic effect of lead and its compounds (including fumes)	injuries & poisonings											TRUE
985	Toxic effect of other metals	injuries & poisonings											TRUE
989	Toxic effect of other substances, chiefly nonmedicinal as to source	injuries & poisonings											TRUE
913	Toxic effect of venom	injuries & poisonings											TRUE
695.1	Toxic erythema	dermatologic											TRUE
569.1	Toxic gastroenteritis and colitis	digestive											TRUE
362.5	Toxic maculopathy of retina	sense organs											TRUE
242.2	Toxic multinodular goiter	endocrine/metabolic											TRUE
519.1	Tracheostomy complications	respiratory											TRUE
292.5	Transient alteration of awareness	mental disorders											TRUE
433.31	Transient cerebral ischemia	circulatory system											TRUE
872	Traumatic amputation	injuries & poisonings											TRUE
958.2	Traumatic and surgical subcutaneous emphysema	injuries & poisonings											TRUE
836	Traumatic arthropathy	injuries & poisonings											TRUE
352.1	Trigeminal nerve disorders [CN5]	neurological											TRUE
10	Tuberculosis	infectious diseases											TRUE
385.5	Tympanosclerosis and middle ear disease related to otitis media	sense organs											TRUE
250.11	Type 1 diabetes with ketoacidosis	endocrine/metabolic											TRUE
250.14	Type 1 diabetes with neurological manifestations	endocrine/metabolic											TRUE
250.13	Type 1 diabetes with ophthalmic manifestations	endocrine/metabolic											TRUE
250.12	Type 1 diabetes with renal manifestations	endocrine/metabolic											TRUE
250.21	Type 2 diabetes with ketoacidosis	endocrine/metabolic											TRUE
250.24	Type 2 diabetes with neurological manifestations	endocrine/metabolic											TRUE
250.23	Type 2 diabetes with ophthalmic manifestations	endocrine/metabolic											TRUE
250.22	Type 2 diabetes with renal manifestations	endocrine/metabolic											TRUE
530.12	Ulcer of esophagus	digestive											TRUE
556.1	Ulceration of intestine	digestive											TRUE
556	Ulceration of the lower GI tract	digestive											TRUE
555.21	Ulcerative colitis (chronic)	digestive											TRUE
709.7	Unspecified diffuse connective tissue disease	dermatologic											TRUE
272.9	Unspecified disorder of lipoid metabolism	endocrine/metabolic											TRUE
695.9	Unspecified erythematous condition	dermatologic											TRUE
716.2	Unspecified monoarthritis	musculoskeletal											TRUE
710.19	Unspecified osteomyelitis	musculoskeletal											TRUE
716.1	Unspecified polyarthropathy or polyarthritis	musculoskeletal											TRUE
597.8	Urethral hypermobility/ISD	genitourinary											TRUE
597.1	Urethral stricture (not specified as infectious)	genitourinary											TRUE
592.21	Urethral syndrome	genitourinary											TRUE
592.2	Urethritis and urethral syndrome	genitourinary											TRUE
594	Urinary calculus	genitourinary											TRUE
597.2	Urinary complications NEC	genitourinary											TRUE
599.1	Urinary obstruction	genitourinary											TRUE
618.2	Uterine/Uterovaginal prolapse	genitourinary											TRUE
371.1	Uveitis, noninfectious or NOS	sense organs											TRUE
747.12	Valvular heart disease/ heart chambers	congenital anomalies											TRUE
79.1	Varicella infection	infectious diseases											TRUE
454	Varicose veins	circulatory system											TRUE
454.11	Varicose veins of lower extremity, symptomtic	circulatory system											TRUE
856	Vascular complications of surgery and medical procedures	injuries & poisonings											TRUE
586.3	Vascular disorders of kidney/hypertrophy	genitourinary											TRUE
694.3	Vascular disorders of skin	dermatologic											TRUE
217	Vascular hamartomas and non-neoplastic nevi	neoplasms											TRUE
550.5	Ventral hernia	digestive											TRUE
427.41	Ventricular fibrillation and flutter	circulatory system											TRUE
386	Vertiginous syndromes and other disorders of vestibular system	sense organs											TRUE
586.12	Vesicoureteral reflux	genitourinary											TRUE
8.6	Viral Enteritis	infectious diseases											TRUE
70	Viral hepatitis	infectious diseases											TRUE
70.3	Viral hepatitis C	infectious diseases											TRUE
480.2	Viral pneumonia	respiratory											TRUE
368.4	Visual field defects	sense organs											TRUE
261.1	Vitamin A deficiency	endocrine/metabolic											TRUE
261.2	Vitamin B-complex deficiencies	endocrine/metabolic											TRUE
261.3	Vitamin C deficiencies	endocrine/metabolic											TRUE
261	Vitamin deficiency	endocrine/metabolic											TRUE
694.1	Vitiligo	dermatologic											TRUE
286.11	Von willebrand's disease	hematopoietic											TRUE
446.4	Wegener's granulomatosis	circulatory system											TRUE

## Sheet: UCSF utilization results
phecode	phenotype	category	rpl_count	control_count	rpl_prop	control_prop	odds_ratio_w_hu	p_value_w_hu	adj_p_value_w_hu	count_under10
785	Abdominal pain	symptoms	728	3138	0.189583	0.181818	0.997502	0.960823	1	FALSE
426.7	Abnormal electrocardiogram [ECG] [EKG]	circulatory system	76	401	0.0197917	0.0232343	0.763878	0.0462717	0.334438	FALSE
514	Abnormal findings examination of lungs	respiratory	33	274	0.00859375	0.0158758	0.458214	6.19661e-05	0.00106265	FALSE
564.8	Abnormal findings on exam of gastrointestinal tract/ abdominal area	digestive	15	83	0.00390625	0.00480909	0.672111	0.185151	0.747919	FALSE
701.5	Abnormal granulation tissue	dermatologic	16	185	0.00416667	0.010719	0.397381	0.000500541	0.00747104	FALSE
[truncated: 1,607 more rows]
