# Supplementary material for: Leveraging health records to identify diagnoses associated with recurrent pregnancy loss across two medical centers
Source: iScience. 2026 Jan 7;29(2):114633. doi: 10.1016/j.isci.2026.114633 (PMC12877842; doi:10.1016/j.isci.2026.114633)
Supplement: Data S3. Association analysis results for Stanford [file mmc4.xlsx]

## Sheet: Stanford main results
phecode	phenotype	category	rpl_count	control_count	rpl_prop	control_prop	odds_ratio_crude	p_value_crude	adj_p_value_crude	odds_ratio_w_age_re	p_value_w_age_re	adj_p_value_w_age_re	count_under10
785	Abdominal pain	symptoms	1244	6753	0.267182	0.187484	1.58008	1.84193e-37	7.46655e-36	1.86652	2.77521e-62	2.3062e-60	FALSE
286.9	Abnormal coagulation profile	hematopoietic	22	32	0.00472509	0.00088842	5.33903	1.55579e-09	2.19129e-08	5.18672	1.64443e-08	2.3974e-07	FALSE
426.7	Abnormal electrocardiogram [ECG] [EKG]	circulatory system	106	500	0.0227663	0.0138816	1.65495	3.14709e-06	3.02339e-05	1.69336	2.51789e-06	2.86626e-05	FALSE
514	Abnormal findings examination of lungs	respiratory	44	296	0.00945017	0.00821789	1.15138	0.385183	0.680871	1.17885	0.326424	0.62954	FALSE
564.8	Abnormal findings on exam of gastrointestinal tract/ abdominal area	digestive	30	110	0.0064433	0.00305394	2.11703	0.000282417	0.00181021	2.00791	0.00118321	0.00759268	FALSE
611	Abnormal findings on mammogram or breast exam	genitourinary	17	19	0.0036512	0.000527499	6.94342	6.70787e-09	8.51029e-08	3.13416	0.00107834	0.00696673	FALSE
701.5	Abnormal granulation tissue	dermatologic	10	137	0.00214777	0.00380355	0.563741	0.0800178	0.225789	0.557428	0.0773752	0.228821	FALSE
396	Abnormal heart sounds	circulatory system	52	232	0.0111684	0.00644105	1.74223	0.000318653	0.0020137	1.78273	0.000294748	0.00218692	FALSE
350.1	Abnormal involuntary movements	neurological	36	201	0.00773196	0.00558039	1.38856	0.0707403	0.20447	1.39706	0.0737907	0.220576	FALSE
611.1	Abnormal mammogram	genitourinary	88	216	0.0189003	0.00599684	3.19317	8.19815e-20	1.94648e-18	1.98415	2.61394e-07	3.44791e-06	FALSE
792	Abnormal Papanicolaou smear of cervix and cervical HPV	genitourinary	124	667	0.0266323	0.018518	1.45017	0.000175334	0.00115637	1.30862	0.00820614	0.0389157	FALSE
573.7	Abnormal results of function study of liver	digestive	26	135	0.00558419	0.00374802	1.49265	0.0621368	0.184084	1.37485	0.15058	0.378614	FALSE
246.7	Abnormal results of function study of thyroid	endocrine/metabolic	66	158	0.0141753	0.00438657	3.2636	1.01772e-15	2.0882e-14	2.79628	1.55092e-11	2.86404e-10	FALSE
655.1	Abnormality in fetal heart rate or rhythm	pregnancy complications	369	9903	0.0792526	0.274938	0.226993	3.82618e-157	1.05985e-154	0.248325	1.33589e-135	3.17179e-133	FALSE
654.1	Abnormality of organs and soft tissues of pelvis complicating pregnancy, childbirth, or the puerperium	pregnancy complications	564	7109	0.121134	0.197368	0.56051	4.14612e-35	1.49801e-33	0.442254	1.07443e-63	9.39842e-62	FALSE
614.54	Abscess or ulceration of vulva	genitourinary	13	66	0.0027921	0.00183237	1.52523	0.164718	0.380224	1.58533	0.139324	0.357962	FALSE
626.11	Absent or infrequent menstruation	genitourinary	951	3068	0.204253	0.0851773	2.7568	2.54712e-135	4.23332e-133	2.73619	1.08724e-122	2.25873e-120	FALSE
276.41	Acidosis	endocrine/metabolic	11	85	0.00236254	0.00235987	1.00114	0.997173	0.997891	1.01575	0.962078	1	FALSE
706.1	Acne	dermatologic	260	1218	0.0558419	0.0338155	1.6899	7.57887e-14	1.39956e-12	1.62038	2.62899e-11	4.74932e-10	FALSE
701.6	Acquired acanthosis nigricans	dermatologic	19	49	0.00408076	0.00136039	3.00788	4.74228e-05	0.000353438	3.65931	5.38227e-06	5.88509e-05	FALSE
735	Acquired foot deformities	musculoskeletal	10	31	0.00214777	0.000860657	2.49872	0.0118754	0.047559	2.44312	0.0181708	0.0754998	FALSE
244.2	Acquired hypothyroidism	endocrine/metabolic	165	656	0.0354381	0.0182126	1.98055	1.16382e-14	2.2756e-13	1.56575	8.48713e-07	1.02961e-05	FALSE
702.1	Actinic keratosis	dermatologic	14	41	0.00300687	0.00113829	2.64653	0.00168872	0.00885379	1.80233	0.0662999	0.2083	FALSE
540.11	Acute appendicitis	digestive	14	109	0.00300687	0.00302618	0.993601	0.981986	0.984949	1.19538	0.540978	0.864429	FALSE
483	Acute bronchitis and bronchiolitis	respiratory	91	377	0.0195447	0.0104667	1.88461	7.55916e-08	9.10385e-07	1.59726	0.000121544	0.001005	FALSE
498	Acute bronchospasm	respiratory	16	78	0.00343643	0.00216552	1.5889	0.0920892	0.252562	1.28284	0.380211	0.688893	FALSE
592.11	Acute cystitis	genitourinary	177	835	0.0380155	0.0231822	1.66514	1.43111e-09	2.03291e-08	1.86904	1.04395e-12	2.09041e-11	FALSE
535.1	Acute gastritis	digestive	17	84	0.0036512	0.0023321	1.5677	0.0914706	0.251279	1.68911	0.0571415	0.18658	FALSE
614.31	Acute inflammatory pelvic disease	genitourinary	14	72	0.00300687	0.00199895	1.50575	0.161738	0.374387	2.43333	0.0037421	0.0201274	FALSE
465.4	Acute laryngitis and tracheitis	respiratory	11	43	0.00236254	0.00119381	1.98131	0.0432284	0.135302	1.53456	0.22154	0.491589	FALSE
338.1	Acute pain	neurological	155	762	0.0332904	0.0211555	1.59336	1.95488e-07	2.15166e-06	1.64969	7.72083e-08	1.0605e-06	FALSE
577.1	Acute pancreatitis	digestive	14	78	0.00300687	0.00216552	1.38969	0.257581	0.526567	1.90937	0.0321679	0.121507	FALSE
465.2	Acute pharyngitis	respiratory	324	1661	0.0695876	0.0461146	1.54709	3.79492e-12	6.30716e-11	1.64615	2.37993e-14	5.49366e-13	FALSE
285.1	Acute posthemorrhagic anemia	hematopoietic	91	1146	0.0195447	0.0318165	0.606604	5.55632e-06	4.93829e-05	0.640486	7.48887e-05	0.000655079	FALSE
300.8	Acute reaction to stress	mental disorders	26	69	0.00558419	0.00191566	2.92578	3.24658e-06	3.08332e-05	2.60992	6.74226e-05	0.000602453	FALSE
585.1	Acute renal failure	genitourinary	17	145	0.0036512	0.00402565	0.906643	0.702748	0.953823	1.07569	0.781432	1	FALSE
464	Acute sinusitis	respiratory	183	633	0.0393041	0.0175741	2.28707	3.48846e-22	9.2029e-21	1.90996	2.91706e-13	5.98537e-12	FALSE
474.1	Acute tonsillitis	respiratory	15	107	0.00322165	0.00297065	1.08476	0.768268	0.953823	1.36024	0.275977	0.564174	FALSE
465	Acute upper respiratory infections of multiple or unspecified sites	respiratory	376	2030	0.080756	0.0563591	1.47091	4.02811e-11	6.31577e-10	1.46279	3.0887e-10	5.3473e-09	FALSE
304	Adjustment reaction	mental disorders	151	485	0.0324313	0.0134651	2.45575	2.00077e-21	5.11583e-20	2.19747	9.3871e-16	2.32856e-14	FALSE
979	Adverse drug events and drug allergies	injuries & poisonings	12	61	0.00257732	0.00169355	1.52319	0.183218	0.410388	1.89678	0.0512063	0.174395	FALSE
967	Adverse effects of sedatives or other central nervous system depressants and anesthetics	injuries & poisonings	12	94	0.00257732	0.00260973	0.987547	0.967435	0.979476	1.01343	0.966064	1	FALSE
300.12	Agorophobia, social phobia, and panic disorder	mental disorders	63	314	0.0135309	0.00871762	1.55971	0.00137767	0.00745828	1.62225	0.00072828	0.00492033	FALSE
317	Alcohol-related disorders	mental disorders	13	57	0.0027921	0.0015825	1.7665	0.0644717	0.190154	1.7955	0.0691013	0.213073	FALSE
317.1	Alcoholism	mental disorders	25	153	0.00536942	0.00424776	1.26548	0.276319	0.542664	1.72579	0.0149522	0.0648838	FALSE
371.21	Allergic conjunctivitis	sense organs	31	112	0.00665808	0.00310947	2.14887	0.000171205	0.00113817	1.92121	0.00183991	0.0109478	FALSE
476	Allergic rhinitis	respiratory	305	1427	0.0655069	0.039618	1.69927	3.81782e-16	8.03192e-15	1.44841	3.61002e-08	5.12807e-07	FALSE
949	Allergies, other	injuries & poisonings	99	467	0.0212629	0.0129654	1.65388	6.73538e-06	5.89169e-05	1.53622	0.000204893	0.00156463	FALSE
704.1	Alopecia	dermatologic	129	473	0.0277062	0.013132	2.14145	3.69228e-14	6.97338e-13	1.7904	2.2689e-08	3.27905e-07	FALSE
291.8	Alteration of consciousness	mental disorders	15	60	0.00322165	0.00166579	1.93703	0.0221974	0.0806467	1.98913	0.0222746	0.0892058	FALSE
110.12	Althete's foot	infectious diseases	21	92	0.00451031	0.00255421	1.7693	0.0185517	0.0697578	1.55491	0.0784936	0.231717	FALSE
565	Anal and rectal conditions	digestive	75	338	0.0161082	0.00938394	1.72831	2.09442e-05	0.000169802	1.69519	6.57536e-05	0.000590716	FALSE
946	Anaphylactic shock NOS	injuries & poisonings	11	75	0.00236254	0.00208223	1.13494	0.695361	0.953823	1.06996	0.838492	1	FALSE
644	Anemia during pregnancy	pregnancy complications	280	4181	0.0601375	0.116078	0.487244	1.8587e-29	5.82861e-28	0.507644	1.97945e-25	6.45068e-24	FALSE
635.2	Antepartum hemorrhage, abruptio placentae, and placenta previa	pregnancy complications	593	3390	0.127363	0.094117	1.40479	8.5116e-13	1.47357e-11	1.36188	2.90328e-10	5.07921e-09	FALSE
300.1	Anxiety disorder	mental disorders	460	2477	0.0987973	0.0687693	1.48452	1.29937e-13	2.3221e-12	1.39866	1.38862e-09	2.21911e-08	FALSE
292.1	Aphasia/speech disturbance	mental disorders	10	34	0.00214777	0.000943946	2.27805	0.0222239	0.0806467	2.31912	0.0261254	0.102649	FALSE
427.5	Arrhythmia (cardiac) NOS	circulatory system	41	288	0.00880584	0.00799578	1.10221	0.56159	0.85787	1.16456	0.377944	0.688893	FALSE
526.42	Arthralgia/ankylosis of temporomandibular joint	digestive	20	53	0.00429553	0.00147145	2.92754	4.38927e-05	0.000330569	2.55381	0.000575481	0.00396867	FALSE
716.9	Arthropathy NOS	musculoskeletal	11	43	0.00236254	0.00119381	1.98131	0.0432284	0.135302	1.64156	0.154133	0.383303	FALSE
572	Ascites (non malignant)	digestive	30	122	0.0064433	0.0033871	1.90816	0.00157043	0.00833886	2.25237	0.000135365	0.00110283	FALSE
495	Asthma	respiratory	298	2153	0.0640034	0.059774	1.0756	0.253863	0.520889	1.05971	0.378968	0.688893	FALSE
495.2	Asthma with exacerbation	respiratory	93	505	0.0199742	0.0140204	1.43331	0.00157926	0.00835903	1.41207	0.00344877	0.0187315	FALSE
367.2	Astigmatism	sense organs	46	401	0.00987973	0.011133	0.886303	0.440412	0.735643	0.777671	0.113646	0.310129	FALSE
939	Atopic/contact dermatitis due to other or unspecified	dermatologic	336	1739	0.0721649	0.0482801	1.53319	4.46056e-12	7.26809e-11	1.36201	1.1668e-06	1.36565e-05	FALSE
427.21	Atrial fibrillation	circulatory system	10	52	0.00214777	0.00144368	1.48875	0.249621	0.517535	1.46293	0.284312	0.572759	FALSE
535.2	Atrophic gastritis	digestive	31	102	0.00665808	0.00283184	2.36021	2.97875e-05	0.000235747	2.08509	0.000598529	0.00411056	FALSE
313.1	Attention deficit hyperactivity disorder	mental disorders	35	217	0.00751718	0.0060246	1.24962	0.22288	0.477969	1.23242	0.266633	0.551667	FALSE
760	Back pain	symptoms	473	2971	0.101589	0.0824842	1.25781	1.09256e-05	9.17086e-05	1.34215	4.87834e-08	6.7565e-07	FALSE
38.3	Bacteremia	infectious diseases	16	59	0.00343643	0.00163802	2.10169	0.0085119	0.0356342	2.33625	0.00413335	0.0217393	FALSE
8.5	Bacterial enteritis	infectious diseases	30	105	0.0064433	0.00291513	2.21815	0.000124352	0.000861139	1.99507	0.00135444	0.00839956	FALSE
41	Bacterial infection NOS	infectious diseases	142	696	0.0304983	0.0193231	1.59652	5.51868e-07	5.87952e-06	1.77327	3.92557e-09	6.04101e-08	FALSE
539	Bariatric surgery	digestive	11	90	0.00236254	0.00249868	0.945387	0.860588	0.953823	0.847305	0.612192	0.933166	FALSE
172.21	Basal cell carcinoma	neoplasms	12	40	0.00257732	0.00111053	2.32422	0.0104816	0.0432267	1.4694	0.259315	0.54317	FALSE
610.4	Benign neoplasm of breast	genitourinary	42	231	0.00902062	0.00641328	1.41025	0.0413006	0.130003	1.27747	0.157021	0.387769	FALSE
208	Benign neoplasm of colon	neoplasms	11	65	0.00236254	0.0018046	1.30991	0.408195	0.69656	0.919794	0.80419	1	FALSE
211	Benign neoplasm of other parts of digestive system	neoplasms	13	28	0.0027921	0.000777368	3.59899	0.000137998	0.000947736	3.09778	0.00125954	0.00798988	FALSE
220	Benign neoplasm of ovary	neoplasms	30	210	0.0064433	0.00583026	1.10583	0.607418	0.907849	1.03778	0.853647	1	FALSE
227.3	Benign neoplasm of pituitary gland and craniopharyngeal duct (pouch)	neoplasms	29	81	0.00622852	0.00224881	2.78078	2.43029e-06	2.40425e-05	2.42405	6.852e-05	0.000608986	FALSE
216	Benign neoplasm of skin	neoplasms	299	1436	0.0642182	0.0398678	1.65269	1.82704e-14	3.49027e-13	1.35874	7.13238e-06	7.45536e-05	FALSE
229	Benign neoplasm of unspecified sites	neoplasms	11	64	0.00236254	0.00177684	1.33041	0.382295	0.67665	1.20553	0.576184	0.898328	FALSE
296.1	Bipolar	mental disorders	46	225	0.00987973	0.0062467	1.58739	0.0044767	0.0208997	1.4303	0.0341005	0.126507	FALSE
367.9	Blindness and low vision	sense organs	10	70	0.00214777	0.00194342	1.10537	0.767202	0.953823	0.959808	0.906311	1	FALSE
578.2	Blood in stool	digestive	55	210	0.0118127	0.00583026	2.03837	2.9165e-06	2.8441e-05	2.29573	1.58939e-07	2.1303e-06	FALSE
613.9	Breast disorder NOS	genitourinary	11	87	0.00236254	0.00241539	0.978068	0.944816	0.96991	0.743836	0.366265	0.67803	FALSE
497	Bronchitis	respiratory	34	125	0.00730241	0.00347039	2.11233	0.000116411	0.000812919	1.97108	0.000745806	0.0049981	FALSE
1000	Burns	NULL	20	105	0.00429553	0.00291513	1.47557	0.111527	0.294687	1.6271	0.0520585	0.175144	FALSE
726.3	Bursitis	musculoskeletal	19	42	0.00408076	0.00116605	3.50988	5.78494e-06	5.11413e-05	2.65667	0.000623468	0.00424674	FALSE
726.4	Calcaneal spur; Exostosis NOS	musculoskeletal	12	20	0.00257732	0.000555263	4.65103	2.60321e-05	0.000208006	4.23306	0.000139614	0.0011319	FALSE
574.2	Calculus of bile duct	digestive	26	169	0.00558419	0.00469197	1.19123	0.407463	0.69656	1.58127	0.0376094	0.137076	FALSE
594.1	Calculus of kidney	genitourinary	54	255	0.0115979	0.0070796	1.64571	0.000941167	0.00528453	1.6821	0.00087714	0.0057394	FALSE
594.3	Calculus of ureter	genitourinary	10	55	0.00214777	0.00152697	1.40743	0.320648	0.60196	1.41825	0.328164	0.631991	FALSE
112	Candidiasis	infectious diseases	261	1313	0.0560567	0.036453	1.56972	9.48708e-11	1.45996e-09	1.5973	9.05693e-11	1.61856e-09	FALSE
686.1	Carbuncle and furuncle	dermatologic	53	681	0.0113832	0.0189067	0.597489	0.000330812	0.00208261	0.57072	0.00011422	0.000953937	FALSE
747	Cardiac and circulatory congenital anomalies	congenital anomalies	20	169	0.00429553	0.00469197	0.915143	0.708256	0.953823	0.841557	0.476624	0.792942	FALSE
747.1	Cardiac congenital anomalies	congenital anomalies	36	329	0.00773196	0.00913407	0.845301	0.340249	0.624165	0.920165	0.643753	0.947138	FALSE
747.11	Cardiac shunt/ heart septal defect	congenital anomalies	29	265	0.00622852	0.00735723	0.845624	0.392742	0.690212	0.82708	0.343922	0.655503	FALSE
416	Cardiomegaly	circulatory system	16	134	0.00343643	0.00372026	0.923443	0.763717	0.953823	0.920253	0.759377	1	FALSE
366	Cataract	sense organs	10	17	0.00214777	0.000471973	4.55825	0.000142689	0.000965498	3.58195	0.00258781	0.0145795	FALSE
557.1	Celiac disease	digestive	28	97	0.00601375	0.00269302	2.24054	0.000176511	0.00115953	1.90432	0.00364027	0.0196433	FALSE
681.3	Cellulitis and abscess of arm/hand	dermatologic	16	84	0.00343643	0.0023321	1.47516	0.154757	0.365549	1.74011	0.0515893	0.174982	FALSE
681.2	Cellulitis and abscess of face/neck	dermatologic	10	59	0.00214777	0.00163802	1.31186	0.427816	0.716764	1.57619	0.195433	0.450498	FALSE
681.1	Cellulitis and abscess of fingers/toes	dermatologic	30	179	0.0064433	0.0049696	1.29847	0.186908	0.415439	1.336	0.155522	0.385213	FALSE
681.5	Cellulitis and abscess of leg, except foot	dermatologic	17	90	0.0036512	0.00249868	1.46294	0.150963	0.362049	1.79349	0.0330147	0.123582	FALSE
681.7	Cellulitis and abscess of trunk	dermatologic	26	155	0.00558419	0.00430328	1.29933	0.217868	0.467824	1.42967	0.105948	0.294459	FALSE
433.21	Cerebral artery occlusion, with cerebral infarction	circulatory system	13	38	0.0027921	0.001055	2.65115	0.00243837	0.0121699	2.68825	0.00318141	0.0174505	FALSE
348.2	Cerebral edema and compression of brain	neurological	14	47	0.00300687	0.00130487	2.30829	0.00607376	0.0265647	2.77338	0.00145271	0.00894225	FALSE
636.8	Cervical incompetence	pregnancy complications	150	269	0.0322165	0.00746828	4.42409	3.84435e-47	2.06106e-45	4.68259	8.25874e-46	5.08371e-44	FALSE
180.3	Cervical intraepithelial neoplasia [CIN] [Cervical dysplasia]	neoplasms	95	391	0.0204038	0.0108554	1.89792	2.86341e-08	3.55149e-07	1.69495	9.1975e-06	9.49456e-05	FALSE
765	Cervical radiculitis	symptoms	31	92	0.00665808	0.00255421	2.61748	3.83233e-06	3.55828e-05	1.79807	0.00684641	0.0334668	FALSE
761	Cervicalgia	symptoms	189	924	0.0405928	0.0256531	1.60701	5.61365e-09	7.28897e-08	1.52986	4.73356e-07	6.00548e-06	FALSE
614.51	Cervicitis and endocervicitis	genitourinary	102	499	0.0219072	0.0138538	1.59433	2.15393e-05	0.000173778	1.57477	6.38547e-05	0.000579926	FALSE
687.3	Changes in skin texture	dermatologic	12	33	0.00257732	0.000916183	2.81779	0.00214164	0.0108518	2.4148	0.0127344	0.0564391	FALSE
574.3	Cholecystitis without cholelithiasis	digestive	19	129	0.00408076	0.00358144	1.13999	0.594653	0.892785	1.48457	0.123242	0.329836	FALSE
574.1	Cholelithiasis	digestive	69	464	0.0148196	0.0128821	1.15266	0.274354	0.539617	1.39294	0.0144773	0.0629876	FALSE
574.11	Cholelithiasis with acute cholecystitis	digestive	13	74	0.0027921	0.00205447	1.36004	0.307162	0.58746	2.11622	0.0167098	0.0715764	FALSE
574.12	Cholelithiasis with other cholecystitis	digestive	22	193	0.00472509	0.00535828	0.881267	0.57522	0.870688	1.06077	0.800992	1	FALSE
575.6	Cholesterolosis of gallbladder	digestive	13	70	0.0027921	0.00194342	1.43792	0.229751	0.489592	1.33563	0.353644	0.664132	FALSE
758.1	Chromosomal anomalies	congenital anomalies	91	193	0.0195447	0.00535828	3.70034	1.75772e-24	4.86888e-23	2.90607	1.5398e-15	3.76344e-14	FALSE
798.1	Chronic fatigue syndrome	symptoms	19	55	0.00408076	0.00152697	2.6793	0.000217947	0.00141495	2.36158	0.00208233	0.0121008	FALSE
614.32	Chronic inflammatory pelvic disease	genitourinary	34	38	0.00730241	0.001055	6.96528	2.32454e-16	4.95306e-15	5.78231	1.4558e-12	2.8804e-11	FALSE
245.21	Chronic lymphocytic thyroiditis	endocrine/metabolic	129	416	0.0277062	0.0115495	2.43878	2.33398e-18	5.38761e-17	1.90695	8.53986e-10	1.41933e-08	FALSE
338.2	Chronic pain	neurological	216	1073	0.0463918	0.0297898	1.58441	1.59072e-09	2.22166e-08	1.35371	0.000121426	0.001005	FALSE
472	Chronic pharyngitis and nasopharyngitis	respiratory	37	139	0.00794674	0.00385907	2.06772	9.11551e-05	0.00064468	1.78921	0.00245136	0.0140006	FALSE
585.3	Chronic renal failure [CKD]	genitourinary	12	75	0.00257732	0.00208223	1.23838	0.492206	0.791147	1.58674	0.152061	0.381033	FALSE
475	Chronic sinusitis	respiratory	95	319	0.0204038	0.00885644	2.33099	7.17683e-13	1.25557e-11	1.99684	1.47728e-08	2.17278e-07	FALSE
474.2	Chronic tonsillitis and adenoiditis	respiratory	27	149	0.00579897	0.00413671	1.40418	0.105574	0.282552	1.52011	0.05353	0.17829	FALSE
459.9	Circulatory disease NEC	circulatory system	11	56	0.00236254	0.00155474	1.52081	0.204157	0.443542	1.57855	0.181259	0.424712	FALSE
701.3	Circumscribed scleroderma	dermatologic	11	32	0.00236254	0.00088842	2.66319	0.00511397	0.0227866	2.27407	0.0232597	0.0929271	FALSE
286.3	Coagulation defects complicating pregnancy or postpartum	hematopoietic	166	1869	0.0356529	0.0518893	0.675528	1.9824e-06	1.98479e-05	0.654947	4.9974e-07	6.29219e-06	FALSE
639	Complications following abortion or ectopic and molar pregnancies	pregnancy complications	34	12	0.00730241	0.000333158	22.0727	3.39918e-20	8.432e-19	24.5495	1.74141e-19	5.07758e-18	FALSE
669	Complications of labor and delivery NEC	pregnancy complications	257	3851	0.0551976	0.106916	0.488011	3.28357e-27	9.74516e-26	0.467621	1.86801e-29	6.89919e-28	FALSE
1011	Complications of surgical and medical procedures	NULL	66	414	0.0141753	0.0114939	1.23664	0.111522	0.294687	1.27336	0.0787373	0.232024	FALSE
851	Complications of transplants and reattached limbs	injuries & poisonings	10	120	0.00214777	0.00333158	0.643906	0.181248	0.407623	0.618265	0.15223	0.381033	FALSE
817	Concussion	injuries & poisonings	16	94	0.00343643	0.00260973	1.31787	0.308246	0.588855	1.48348	0.163218	0.395434	FALSE
751.11	Congenital anomalies of female genital organs	congenital anomalies	161	276	0.034579	0.00766262	4.63851	1.05107e-52	6.71876e-51	4.4614	8.83857e-46	5.24632e-44	FALSE
747.13	Congenital anomalies of great vessels	congenital anomalies	13	96	0.0027921	0.00266526	1.04772	0.874831	0.953823	1.05251	0.866116	1	FALSE
691	Congenital anomalies of skin	dermatologic	16	81	0.00343643	0.00224881	1.52993	0.120718	0.31164	1.44339	0.189986	0.441	FALSE
286.12	Congenital deficiency of other clotting factors (including factor VII)	hematopoietic	10	36	0.00214777	0.000999473	2.15137	0.0322612	0.107656	1.9553	0.0686621	0.212472	FALSE
756.5	Congenital osteodystrophies	congenital anomalies	16	73	0.00343643	0.00202671	1.69797	0.0555059	0.168144	1.42909	0.209687	0.470468	FALSE
428.1	Congestive heart failure (CHF) NOS	circulatory system	10	71	0.00214777	0.00197118	1.08978	0.799292	0.953823	0.995763	0.990233	1	FALSE
369.5	Conjunctivitis, infectious	sense organs	72	398	0.0154639	0.0110497	1.40576	0.00830022	0.034924	1.26514	0.0765508	0.227192	FALSE
563	Constipation	digestive	237	1487	0.0509021	0.0412838	1.24548	0.00221525	0.0111907	1.29195	0.000522497	0.00364189	FALSE
916	Contusion	injuries & poisonings	77	501	0.0165378	0.0139093	1.19215	0.154387	0.365549	1.35254	0.0183528	0.0760656	FALSE
345.3	Convulsions	neurological	18	115	0.00386598	0.00319276	1.21168	0.449619	0.748014	1.45218	0.153489	0.383303	FALSE
700	Corns and callosities	dermatologic	22	70	0.00472509	0.00194342	2.43812	0.000273789	0.00176371	2.25225	0.00129148	0.00813046	FALSE
411.4	Coronary atherosclerosis	circulatory system	11	59	0.00236254	0.00163802	1.44336	0.264361	0.532937	1.29433	0.446675	0.759217	FALSE
512.8	Cough	respiratory	364	1857	0.0781787	0.0515561	1.56017	8.1789e-14	1.47754e-12	1.52999	5.89904e-12	1.12163e-10	FALSE
1008	Crushing or internal injury to organs	NULL	11	71	0.00236254	0.00197118	1.19901	0.575832	0.870821	1.10641	0.759876	1	FALSE
586.2	Cyst of kidney, acquired	genitourinary	10	45	0.00214777	0.00124934	1.72067	0.120943	0.31164	1.64809	0.168888	0.403865	FALSE
614.53	Cyst or abscess of Bartholin's gland	genitourinary	16	85	0.00343643	0.00235987	1.45777	0.167339	0.385738	1.3709	0.25942	0.54317	FALSE
751.21	Cystic kidney disease	congenital anomalies	11	48	0.00236254	0.00133263	1.77467	0.0865073	0.238829	1.92697	0.0588653	0.19071	FALSE
610.1	Cystic mastopathy	genitourinary	85	321	0.018256	0.00891196	2.06798	3.47257e-09	4.61713e-08	1.62887	0.000126786	0.00103802	FALSE
592.1	Cystitis	genitourinary	43	151	0.0092354	0.00419223	2.21419	4.65177e-06	4.22472e-05	2.32037	3.05635e-06	3.45555e-05	FALSE
302.1	Decreased libido	mental disorders	14	62	0.00300687	0.00172131	1.7491	0.0591782	0.175947	1.32347	0.362842	0.674545	FALSE
288.1	Decreased white blood cell count	hematopoietic	19	77	0.00408076	0.00213776	1.91262	0.0115101	0.0465018	1.66781	0.053011	0.177239	FALSE
452.2	Deep vein thrombosis [DVT]	circulatory system	19	95	0.00408076	0.0026375	1.54945	0.0820164	0.229677	1.26044	0.373163	0.6853	FALSE
722.6	Degeneration of intervertebral disc	musculoskeletal	33	114	0.00708763	0.003165	2.24823	4.39566e-05	0.000330569	1.76142	0.00587485	0.0294985	FALSE
296.2	Depression	mental disorders	153	652	0.0328608	0.0181016	1.84306	2.03877e-11	3.22708e-10	1.78323	1.28434e-09	2.07241e-08	FALSE
110.2	Dermatomycoses	infectious diseases	35	140	0.00751718	0.00388684	1.94108	0.000469409	0.00283694	1.75034	0.00426429	0.022287	FALSE
110.1	Dermatophytosis	infectious diseases	11	51	0.00236254	0.00141592	1.67014	0.123278	0.317163	1.69013	0.126845	0.335457	FALSE
110.11	Dermatophytosis of nail	infectious diseases	36	164	0.00773196	0.00455315	1.7036	0.00392507	0.0187456	1.43057	0.060248	0.193305	FALSE
110.13	Dermatophytosis of the body	infectious diseases	22	114	0.00472509	0.003165	1.49526	0.0847553	0.234568	1.44375	0.126957	0.335457	FALSE
649.1	Diabetes or abnormal glucose tolerance complicating pregnancy	pregnancy complications	424	5989	0.0910653	0.166273	0.502367	9.23024e-39	3.83516e-37	0.432399	6.67581e-54	5.04327e-52	FALSE
550.2	Diaphragmatic hernia	digestive	15	51	0.00322165	0.00141592	2.27943	0.00509223	0.0227866	2.2827	0.00716218	0.0346033	FALSE
561.1	Diarrhea	digestive	216	1091	0.0463918	0.0302896	1.55747	5.96745e-09	7.6883e-08	1.79248	1.8534e-13	3.89917e-12	FALSE
704	Diseases of hair and hair follicles	dermatologic	46	164	0.00987973	0.00455315	2.18154	3.24287e-06	3.08332e-05	1.89339	0.000231169	0.00174638	FALSE
528.5	Diseases of lips	digestive	15	90	0.00322165	0.00249868	1.29028	0.361555	0.657445	1.18384	0.554773	0.877291	FALSE
703	Diseases of nail, NOS	dermatologic	27	131	0.00579897	0.00363697	1.59792	0.0269955	0.0930523	1.40255	0.120497	0.325108	FALSE
526	Diseases of the jaws	digestive	15	72	0.00322165	0.00199895	1.61365	0.0923037	0.252733	1.65553	0.0848449	0.245239	FALSE
473	Diseases of the larynx and vocal cords	respiratory	11	54	0.00236254	0.00149921	1.57722	0.168838	0.387582	1.28079	0.464153	0.776861	FALSE
528	Diseases of the oral soft tissues, excluding lesions specific for gingiva and tongue	digestive	32	116	0.00687285	0.00322052	2.14193	0.000142908	0.000965498	2.0837	0.00047893	0.00338716	FALSE
288	Diseases of white blood cells	hematopoietic	10	29	0.00214777	0.000805131	2.67119	0.0074326	0.0315933	2.8316	0.00652397	0.032271	FALSE
830	Dislocation	injuries & poisonings	24	123	0.00515464	0.00341486	1.51211	0.0645287	0.190154	1.34693	0.198215	0.453141	FALSE
689	Disorder of skin and subcutaneous tissue NOS	dermatologic	111	515	0.0238402	0.014298	1.68368	8.52095e-07	8.79616e-06	1.40811	0.00172714	0.0103628	FALSE
255	Disorders of adrenal glands	endocrine/metabolic	13	24	0.0027921	0.000666315	4.19929	3.14735e-05	0.00024791	4.12901	0.000101752	0.000871709	FALSE
277.4	Disorders of bilirubin excretion	endocrine/metabolic	17	40	0.0036512	0.00111053	3.2962	3.89175e-05	0.000298069	3.27314	9.06754e-05	0.000784909	FALSE
724.2	Disorders of coccyx	musculoskeletal	10	33	0.00214777	0.000916183	2.34715	0.018206	0.0688519	2.04779	0.056232	0.184334	FALSE
372	Disorders of conjunctiva	sense organs	28	118	0.00601375	0.00327605	1.84073	0.00379613	0.0182346	1.54292	0.0479125	0.166591	FALSE
275.1	Disorders of iron metabolism	hematopoietic	10	38	0.00214777	0.001055	2.03803	0.0453543	0.140895	1.74713	0.128125	0.33747	FALSE
275.3	Disorders of magnesium metabolism	endocrine/metabolic	17	70	0.0036512	0.00194342	1.88197	0.0195595	0.0732161	2.08489	0.00927756	0.0431913	FALSE
626	Disorders of menstruation and other abnormal bleeding from female genital tract	genitourinary	542	1062	0.116409	0.0294844	4.33655	4.53556e-155	1.07687e-152	4.47964	1.07821e-145	2.98665e-143	FALSE
728	Disorders of muscle, ligament, and fascia	musculoskeletal	19	128	0.00408076	0.00355368	1.14893	0.573065	0.868617	0.949025	0.834377	1	FALSE
377	Disorders of optic nerve and visual pathways	sense organs	12	36	0.00257732	0.000999473	2.58276	0.00446255	0.0208923	2.52727	0.0079169	0.03781	FALSE
275.53	Disorders of phosphorus metabolism	endocrine/metabolic	13	33	0.0027921	0.000916183	3.05326	0.000661881	0.00384631	3.53433	0.000257867	0.00193052	FALSE
253	Disorders of the pituitary gland and its hypothalamic control	endocrine/metabolic	11	37	0.00236254	0.00102724	2.30298	0.01524	0.0589045	1.97932	0.0552134	0.182417	FALSE
619.2	Disorders of uterus, NEC	genitourinary	602	1361	0.129296	0.0377856	3.78145	4.78334e-146	8.83323e-144	3.31341	4.41336e-109	6.1125e-107	FALSE
379.2	Disorders of vitreous body	sense organs	38	143	0.00816151	0.00397013	2.06442	7.58556e-05	0.000543414	1.61075	0.0116779	0.0525981	FALSE
617	Disorders secondary to childbirth, surgery, trauma	genitourinary	375	1373	0.0805412	0.0381188	2.21039	2.69242e-39	1.17758e-37	2.25503	2.42311e-38	1.18447e-36	FALSE
722.1	Displacement of intervertebral disc	musculoskeletal	47	175	0.0100945	0.00485855	2.08867	8.08498e-06	6.89089e-05	1.61659	0.00496142	0.0256881	FALSE
687.4	Disturbance of skin sensation	dermatologic	162	831	0.0347938	0.0230712	1.52643	1.28097e-06	1.31418e-05	1.43819	5.96201e-05	0.000550492	FALSE
350.6	Disturbances of sensation of smell and taste	neurological	14	51	0.00300687	0.00141592	2.12701	0.0124887	0.0494197	2.01238	0.0270551	0.105306	FALSE
270.11	Disturbances of sulphur-bearing amino-acid metabolism	endocrine/metabolic	75	62	0.0161082	0.00172131	9.49495	5.69296e-39	2.42608e-37	7.60635	7.2896e-30	2.75348e-28	FALSE
562.1	Diverticulosis	digestive	13	31	0.0027921	0.000860657	3.25043	0.000365921	0.00226925	3.10624	0.00108148	0.00696673	FALSE
386.9	Dizziness and giddiness (Light-headedness and vertigo)	sense organs	285	1488	0.0612113	0.0413115	1.51311	5.07955e-10	7.47099e-09	1.67445	1.02038e-13	2.26117e-12	FALSE
375.1	Dry eyes	sense organs	43	164	0.0092354	0.00455315	2.03794	3.50047e-05	0.000273135	1.70862	0.00255736	0.0144569	FALSE
705.1	Dyshidrosis	dermatologic	17	73	0.0036512	0.00202671	1.80448	0.0286539	0.0977882	1.56057	0.108644	0.300945	FALSE
626.2	Dysmenorrhea	genitourinary	181	469	0.0388746	0.0130209	3.06586	2.17124e-36	8.20136e-35	2.94457	2.72467e-31	1.10449e-29	FALSE
277.7	Dysmetabolic syndrome X	endocrine/metabolic	73	52	0.0156787	0.00144368	11.0173	1.24431e-39	5.58929e-38	9.83165	2.1868e-33	9.56436e-32	FALSE
625.1	Dyspareunia	genitourinary	109	569	0.0234107	0.0157972	1.4935	0.000148442	0.000998831	1.3658	0.00403675	0.0213174	FALSE
536.8	Dyspepsia and other specified disorders of function of stomach	digestive	31	145	0.00665808	0.00402565	1.65829	0.0108288	0.0442414	1.6943	0.00981012	0.0451646	FALSE
532	Dysphagia	digestive	41	169	0.00880584	0.00469197	1.88458	0.000288406	0.00182951	1.89339	0.000474257	0.00336844	FALSE
300.4	Dysthymic disorder	mental disorders	32	136	0.00687285	0.00377579	1.82592	0.00225234	0.0113093	1.54003	0.034203	0.126605	FALSE
599.3	Dysuria	genitourinary	412	1948	0.088488	0.0540826	1.69792	8.71312e-21	2.19412e-19	1.82156	1.87442e-24	5.76906e-23	FALSE
41.4	E. coli	infectious diseases	24	228	0.00515464	0.00632999	0.813358	0.336933	0.620137	1.09445	0.685128	0.983515	FALSE
636.2	Early onset of delivery	pregnancy complications	110	381	0.0236254	0.0105778	2.26335	8.13698e-14	1.47754e-12	2.51861	6.92219e-16	1.74313e-14	FALSE
636	Early or threatened labor; hemorrhage in early pregnancy	pregnancy complications	433	3208	0.0929983	0.0890641	1.0487	0.376263	0.668107	1.28863	5.17567e-06	5.69667e-05	FALSE
305.2	Eating disorder	mental disorders	10	58	0.00214777	0.00161026	1.33452	0.399843	0.69656	1.47179	0.277057	0.565372	FALSE
782.3	Edema	symptoms	94	527	0.020189	0.0146312	1.38769	0.00375716	0.0180997	1.27825	0.0353502	0.130271	FALSE
1015	Effects of other external causes	NULL	28	128	0.00601375	0.00355368	1.69645	0.0115275	0.0465018	1.5763	0.0371103	0.135555	FALSE
288.2	Elevated white blood cell count	hematopoietic	55	348	0.0118127	0.00966157	1.22531	0.163848	0.378742	1.38671	0.0294586	0.113072	FALSE
615	Endometriosis	genitourinary	197	441	0.042311	0.0122435	3.56428	3.61907e-48	2.0741e-46	2.72932	1.34529e-28	4.70313e-27	FALSE
726.1	Enthesopathy	musculoskeletal	79	318	0.0169674	0.00882867	1.93776	1.77176e-07	1.96312e-06	1.5472	0.00086398	0.00567563	FALSE
345	Epilepsy, recurrent seizures, convulsions	neurological	29	132	0.00622852	0.00366473	1.70397	0.00956237	0.0398312	1.88619	0.00300326	0.0165279	FALSE
477	Epistaxis or throat hemorrhage	respiratory	25	158	0.00536942	0.00438657	1.22527	0.346507	0.634245	1.4223	0.111728	0.305916	FALSE
401.1	Essential hypertension	circulatory system	197	1031	0.042311	0.0286238	1.4993	3.34382e-07	3.63231e-06	1.24072	0.00883847	0.041379	FALSE
381.2	Eustachian tube disorders	sense organs	43	210	0.0092354	0.00583026	1.58949	0.00584168	0.025753	1.31265	0.116276	0.31577	FALSE
626.12	Excessive or frequent menstruation	genitourinary	211	504	0.0453179	0.0139926	3.34497	2.2949e-47	1.27138e-45	2.97284	1.21892e-35	5.78812e-34	FALSE
643	Excessive vomiting in pregnancy	pregnancy complications	210	1200	0.0451031	0.0333158	1.37052	3.76725e-05	0.000289869	1.61756	1.19326e-09	1.95382e-08	FALSE
369.2	Eye infection, viral	sense organs	14	55	0.00300687	0.00152697	1.9721	0.0234819	0.0837488	1.73754	0.0731179	0.219354	FALSE
728.7	Fasciitis	musculoskeletal	36	119	0.00773196	0.00330381	2.35076	7.51752e-06	6.50395e-05	1.8511	0.00180411	0.0107857	FALSE
661	Fetal distress and abnormal forces of labor	pregnancy complications	217	4870	0.0466065	0.135206	0.312673	6.16343e-60	4.26818e-58	0.320904	4.94372e-56	3.9126e-54	FALSE
783	Fever of unknown origin	symptoms	199	1370	0.0427405	0.0380355	1.12923	0.116906	0.305981	1.34782	0.000205228	0.00156463	FALSE
735.1	Flat foot	musculoskeletal	10	38	0.00214777	0.001055	2.03803	0.0453543	0.140895	2.11454	0.0440836	0.154246	FALSE
561.2	Flatulence	digestive	101	397	0.0216924	0.011022	1.98958	9.82959e-10	1.42059e-08	1.80223	4.10491e-07	5.28865e-06	FALSE
1001	Foreign body injury	NULL	25	126	0.00536942	0.00349815	1.53782	0.0499196	0.153641	1.60019	0.0394998	0.142097	FALSE
801	Fracture of ankle and foot	injuries & poisonings	25	142	0.00536942	0.00394236	1.36393	0.153492	0.365549	1.22643	0.362509	0.674545	FALSE
801.1	Fracture of foot	injuries & poisonings	12	31	0.00257732	0.000860657	2.99975	0.00124791	0.00682245	2.33262	0.018558	0.076725	FALSE
804	Fracture of hand or wrist	injuries & poisonings	18	110	0.00386598	0.00305394	1.26693	0.352996	0.645412	1.38917	0.21316	0.475532	FALSE
803.2	Fracture of radius and ulna	injuries & poisonings	14	58	0.00300687	0.00161026	1.86994	0.0358117	0.117394	1.84181	0.0498189	0.171407	FALSE
599.5	Frequency of urination and polyuria	genitourinary	200	806	0.0429553	0.0223771	1.96089	6.45249e-17	1.44919e-15	1.9946	1.69814e-16	4.40987e-15	FALSE
596.5	Functional disorders of bladder	genitourinary	13	45	0.0027921	0.00124934	2.23831	0.010596	0.0435905	1.87139	0.0552517	0.182417	FALSE
612.1	Galactorrhea	genitourinary	27	59	0.00579897	0.00163802	3.55504	5.13443e-08	6.22877e-07	3.50258	2.43219e-07	3.23384e-06	FALSE
727.4	Ganglion and cyst of synovium, tendon, and bursa	musculoskeletal	32	148	0.00687285	0.00410894	1.67731	0.00818293	0.0345179	1.4693	0.0582036	0.1892	FALSE
535.9	Gastritis and duodenitis, NOS	digestive	45	237	0.00966495	0.00657986	1.47344	0.017659	0.0676689	1.58626	0.00669186	0.0328599	FALSE
300.11	Generalized anxiety disorder	mental disorders	167	694	0.0358677	0.0192676	1.89361	3.20121e-13	5.66002e-12	1.71754	2.35459e-09	3.72698e-08	FALSE
618	Genital prolapse	genitourinary	11	129	0.00236254	0.00358144	0.658857	0.184312	0.412283	0.493946	0.0273266	0.106114	FALSE
530.11	GERD	digestive	320	2386	0.0687285	0.0662428	1.04029	0.521879	0.82419	0.962413	0.544765	0.867241	FALSE
365	Glaucoma	sense organs	24	98	0.00515464	0.00272079	1.89918	0.00495844	0.0225779	1.60902	0.0426663	0.150555	FALSE
250.5	Glycosuria or Acetonuria	endocrine/metabolic	15	161	0.00322165	0.00446986	0.719847	0.223965	0.479678	0.795349	0.405246	0.71423	FALSE
242.1	Graves' disease	endocrine/metabolic	44	172	0.00945017	0.00477526	1.98833	5.10198e-05	0.000376866	1.71432	0.00196494	0.0115806	FALSE
593.1	Gross hematuria	genitourinary	14	48	0.00300687	0.00133263	2.26013	0.00733969	0.0312784	2.59018	0.00274421	0.0154048	FALSE
41.8	H. pylori	infectious diseases	19	93	0.00408076	0.00258197	1.58286	0.0686706	0.200581	1.43595	0.168762	0.403865	FALSE
735.3	Hallux valgus (Bunion)	musculoskeletal	33	100	0.00708763	0.00277631	2.56398	2.92624e-06	2.8441e-05	1.93693	0.00152356	0.00927533	FALSE
389	Hearing loss	sense organs	28	195	0.00601375	0.00541381	1.11149	0.602047	0.903071	0.948243	0.798083	1	FALSE
530.9	Heartburn	digestive	44	224	0.00945017	0.00621894	1.52454	0.0109016	0.044408	1.51153	0.0153684	0.0665162	FALSE
228	Hemangioma and lymphangioma, any site	neoplasms	36	106	0.00773196	0.00294289	2.64001	5.27431e-07	5.65542e-06	2.25744	4.45249e-05	0.000420457	FALSE
228.1	Hemangioma of skin and subcutaneous tissue	neoplasms	34	120	0.00730241	0.00333158	2.20065	5.19275e-05	0.000381874	1.75629	0.00485033	0.0251914	FALSE
578.1	Hematemesis	digestive	13	53	0.0027921	0.00147145	1.90003	0.0383344	0.123953	3.29548	0.000272888	0.00203381	FALSE
593	Hematuria	genitourinary	100	546	0.0214777	0.0151587	1.42601	0.00124248	0.00681521	1.49893	0.000366884	0.00268617	FALSE
636.3	Hemorrhage in early pregnancy	pregnancy complications	1367	2425	0.2936	0.0673256	5.75777	0	0	6.49423	0	0	FALSE
459.1	Hemorrhage NOS	circulatory system	27	68	0.00579897	0.00188789	3.08375	7.84817e-07	8.15229e-06	2.65019	5.25778e-05	0.000490923	FALSE
578.8	Hemorrhage of rectum and anus	digestive	81	352	0.0173969	0.00977262	1.79398	2.54537e-06	2.5032e-05	1.80282	4.2225e-06	4.74175e-05	FALSE
850	Hemorrhage or hematoma complicating a procedure	injuries & poisonings	20	65	0.00429553	0.0018046	2.38627	0.000686252	0.00396025	2.56524	0.000523714	0.00364189	FALSE
455	Hemorrhoids	circulatory system	153	883	0.0328608	0.0245148	1.35201	0.000701116	0.0040308	1.1967	0.049121	0.170437	FALSE
573.3	Hepatomegaly	digestive	21	76	0.00451031	0.00211	2.14274	0.00203495	0.0104708	2.27065	0.00130506	0.00818494	FALSE
54	Herpes simplex	infectious diseases	195	1156	0.0418814	0.0320942	1.31828	0.000471507	0.00283929	1.13381	0.124821	0.332824	FALSE
53	Herpes zoster	infectious diseases	34	134	0.00730241	0.00372026	1.96996	0.00043288	0.00262572	1.72645	0.00603364	0.0301288	FALSE
705.3	Hidradenitis	dermatologic	14	56	0.00300687	0.00155474	1.93683	0.0271543	0.0930523	2.19138	0.0117991	0.0528575	FALSE
704.2	Hirsutism	dermatologic	37	140	0.00794674	0.00388684	2.05289	0.000105695	0.000741203	1.95246	0.000439835	0.00313737	FALSE
595	Hydronephrosis	genitourinary	27	340	0.00579897	0.00943946	0.612084	0.0142832	0.0554643	0.663342	0.0445391	0.155513	FALSE
272.11	Hypercholesterolemia	endocrine/metabolic	61	166	0.0131014	0.00460868	2.86722	2.61509e-12	4.39018e-11	2.15247	9.40576e-07	1.13252e-05	FALSE
643.1	Hyperemesis gravidarum	pregnancy complications	142	891	0.0304983	0.0247369	1.24023	0.0189226	0.0709916	1.53326	6.76276e-06	7.15905e-05	FALSE
272.12	Hyperglyceridemia	endocrine/metabolic	29	84	0.00622852	0.0023321	2.68125	4.93986e-06	4.46198e-05	2.43736	7.65892e-05	0.000666446	FALSE
705.8	Hyperhidrosis	dermatologic	44	175	0.00945017	0.00485855	1.95408	7.64229e-05	0.000545128	1.73082	0.00185096	0.0109478	FALSE
272.1	Hyperlipidemia	endocrine/metabolic	207	541	0.0444588	0.0150199	3.05119	6.20026e-41	2.86245e-39	2.43294	7.12272e-25	2.27653e-23	FALSE
367.8	Hypermetropia	sense organs	15	51	0.00322165	0.00141592	2.27943	0.00509223	0.0227866	2.15143	0.0122511	0.0545878	FALSE
327.1	Hypersomnia	neurological	21	96	0.00451031	0.00266526	1.6954	0.0287577	0.0979411	1.5088	0.0944344	0.269674	FALSE
642	Hypertension complicating pregnancy, childbirth, and the puerperium	pregnancy complications	242	3688	0.0519759	0.10239	0.48063	7.22172e-27	2.0694e-25	0.461512	1.3583e-28	4.70313e-27	FALSE
623	Hypertrophy of female genital organs	genitourinary	47	201	0.0100945	0.00558039	1.81717	0.000243204	0.00157278	1.55952	0.00842649	0.0396737	FALSE
275.51	Hypocalcemia	endocrine/metabolic	13	63	0.0027921	0.00174908	1.598	0.12435	0.318936	1.45077	0.23818	0.515546	FALSE
251.1	Hypoglycemia	endocrine/metabolic	22	62	0.00472509	0.00172131	2.75333	4.6365e-05	0.000347111	2.82066	7.39398e-05	0.000650201	FALSE
276.14	Hypopotassemia	endocrine/metabolic	62	326	0.0133162	0.00905078	1.47763	0.0051078	0.0227866	1.92714	6.46646e-06	6.90508e-05	FALSE
276.12	Hyposmolality and/or hyponatremia	endocrine/metabolic	31	152	0.00665808	0.00422	1.58162	0.0203933	0.0757093	1.82714	0.00322886	0.0176525	FALSE
458.9	Hypotension NOS	circulatory system	27	260	0.00579897	0.00721841	0.802211	0.277092	0.543074	0.812731	0.318666	0.623821	FALSE
780	Hypothermia/Chills	symptoms	31	157	0.00665808	0.00435881	1.53103	0.0307412	0.103425	2.02093	0.00060849	0.00416177	FALSE
244.4	Hypothyroidism NOS	endocrine/metabolic	729	2720	0.156572	0.0755157	2.27263	2.17006e-74	1.89823e-72	1.83743	8.0135e-39	4.03589e-37	FALSE
276.5	Hypovolemia	endocrine/metabolic	76	501	0.016323	0.0139093	1.17641	0.190471	0.422646	1.47838	0.00244612	0.0140006	FALSE
279.1	Immunity deficiency	endocrine/metabolic	12	32	0.00257732	0.00088842	2.90593	0.00164358	0.00864439	2.83341	0.00293325	0.0161962	FALSE
380.4	Impacted cerumen	sense organs	50	285	0.0107388	0.00791249	1.36108	0.0454786	0.141018	1.27399	0.12536	0.332824	FALSE
250.41	Impaired fasting glucose	endocrine/metabolic	134	572	0.0287801	0.0158805	1.83636	4.13564e-10	6.137e-09	1.49509	6.13253e-05	0.000563109	FALSE
686.2	Impetigo	dermatologic	12	67	0.00257732	0.00186013	1.38656	0.297721	0.574694	1.35042	0.352407	0.663711	FALSE
647.1	Infections of genitourinary tract during pregnancy	pregnancy complications	207	1733	0.0444588	0.0481135	0.920505	0.270951	0.535458	1.26313	0.00279324	0.0155263	FALSE
647	Infectious and parasitic complications affecting pregnancy	pregnancy complications	217	3287	0.0466065	0.0912574	0.486796	1.32383e-23	3.60689e-22	0.518053	2.46351e-19	6.93958e-18	FALSE
626.8	Infertility, female	genitourinary	1707	1563	0.366624	0.0433938	12.7604	0	0	9.69449	0	0	FALSE
626.15	Infertility, female, associated with anovulation	genitourinary	271	309	0.0582045	0.00857881	7.14218	4.74221e-119	5.62968e-117	5.09981	5.16853e-75	4.77227e-73	FALSE
609.1	Infertility, male	genitourinary	41	43	0.00880584	0.00119381	7.43287	4.90203e-20	1.18075e-18	5.40823	1.22051e-13	2.6344e-12	FALSE
371.3	Inflammation of eyelids	sense organs	58	294	0.012457	0.00816236	1.53279	0.00312573	0.0153244	1.42548	0.0174882	0.0737698	FALSE
357	Inflammatory and toxic neuropathy	neurological	16	70	0.00343643	0.00194342	1.77089	0.0394862	0.126936	1.51018	0.151591	0.38058	FALSE
613.1	Inflammatory disease of breast	genitourinary	31	341	0.00665808	0.00946723	0.701288	0.0593232	0.176063	0.661221	0.0309648	0.117974	FALSE
614.4	Inflammatory diseases of uterus, except cervix	genitourinary	234	180	0.0502577	0.00499736	10.5361	1.29536e-121	1.79408e-119	10.4812	5.17541e-108	6.61657e-106	FALSE
481	Influenza	respiratory	39	303	0.00837629	0.00841223	0.995692	0.979837	0.983387	1.14148	0.451545	0.764224	FALSE
703.1	Ingrowing nail	dermatologic	17	135	0.0036512	0.00374802	0.974073	0.918846	0.953823	1.2992	0.323684	0.628521	FALSE
1009	Injury, NOS	NULL	220	1345	0.0472509	0.0373414	1.27854	0.000965859	0.00540491	1.38199	2.77636e-05	0.000269842	FALSE
912	Insect bite	injuries & poisonings	23	148	0.00493986	0.00410894	1.20323	0.410257	0.69656	1.24206	0.348893	0.660432	FALSE
327.4	Insomnia	neurological	162	603	0.0347938	0.0167412	2.11721	7.19763e-17	1.59499e-15	1.78487	5.39646e-10	9.24631e-09	FALSE
835	Internal derangement of knee	injuries & poisonings	39	148	0.00837629	0.00410894	2.04732	7.31059e-05	0.000525983	1.86394	0.00083052	0.0054993	FALSE
271.3	Intestinal disaccharidase deficiencies and disaccharide malabsorption	endocrine/metabolic	115	519	0.0246993	0.0144091	1.73224	1.36804e-07	1.55731e-06	1.43855	0.000738991	0.00497248	FALSE
8	Intestinal infection	infectious diseases	50	166	0.0107388	0.00460868	2.34457	1.46119e-07	1.65203e-06	2.14156	7.08193e-06	7.44948e-05	FALSE
557	Intestinal malabsorption (non-celiac)	digestive	23	58	0.00493986	0.00161026	3.078	5.27715e-06	4.71539e-05	2.84231	4.31614e-05	0.000412266	FALSE
280.2	Iron deficiency anemia secondary to blood loss (chronic)	hematopoietic	46	183	0.00987973	0.00508065	1.954	5.26986e-05	0.000385837	1.89858	0.00019849	0.00153438	FALSE
280.1	Iron deficiency anemias, unspecified or not due to blood loss	hematopoietic	206	1250	0.044244	0.0347039	1.28762	0.0010055	0.00558908	1.32162	0.000432929	0.00310141	FALSE
626.14	Irregular menstrual bleeding	genitourinary	188	424	0.040378	0.0117716	3.53238	1.36864e-45	6.89294e-44	3.52643	1.79027e-41	9.59814e-40	FALSE
626.13	Irregular menstrual cycle	genitourinary	1082	1930	0.232388	0.0535828	5.34724	0	0	4.95476	1.41972e-292	4.71915e-290	FALSE
626.1	Irregular menstrual cycle/bleeding	genitourinary	160	280	0.0343643	0.00777368	4.54232	2.18169e-51	1.34295e-49	4.41255	4.27406e-45	2.36783e-43	FALSE
564.1	Irritable Bowel Syndrome	digestive	83	334	0.0178265	0.00927288	1.93917	8.50821e-08	1.01731e-06	1.61017	0.000196673	0.00152743	FALSE
573.5	Jaundice (not of newborn)	digestive	15	48	0.00322165	0.00133263	2.42209	0.0028223	0.0139603	2.9733	0.000397893	0.00290043	FALSE
741.4	Joint effusions	musculoskeletal	54	212	0.0115979	0.00588578	1.98189	8.04117e-06	6.88888e-05	1.89083	6.53098e-05	0.000589918	FALSE
840.3	Joint/ligament sprain	injuries & poisonings	66	355	0.0141753	0.00985591	1.44455	0.00642559	0.0278108	1.3335	0.0394997	0.142097	FALSE
701.4	Keloid scar	dermatologic	23	179	0.00493986	0.0049696	0.993987	0.97833	0.982468	0.894476	0.622805	0.935435	FALSE
655	Known or suspected fetal abnormality affecting management of mother	pregnancy complications	1513	15199	0.324957	0.421972	0.659417	2.23711e-36	8.26238e-35	0.67353	2.49672e-31	1.03739e-29	FALSE
737.3	Kyphoscoliosis and scoliosis	musculoskeletal	33	302	0.00708763	0.00838446	0.844225	0.357385	0.652002	0.883345	0.508194	0.830127	FALSE
1012	Late effect	NULL	10	22	0.00214777	0.000610789	3.5218	0.000972727	0.00542507	4.61684	9.69345e-05	0.000834742	FALSE
645	Late pregnancy and failed induction	pregnancy complications	185	7078	0.0397337	0.196507	0.169188	2.77068e-120	3.54221e-118	0.191546	8.86697e-103	1.05264e-100	FALSE
214	Lipoma	neoplasms	18	67	0.00386598	0.00186013	2.08252	0.00580779	0.0256717	1.68443	0.0552855	0.182417	FALSE
214.1	Lipoma of skin and subcutaneous tissue	neoplasms	13	50	0.0027921	0.00138816	2.0142	0.0246811	0.0878373	1.6469	0.121367	0.326401	FALSE
277.51	Lipoprotein disorders	endocrine/metabolic	25	75	0.00536942	0.00208223	2.5872	4.01267e-05	0.00030592	2.44917	0.000175496	0.00138892	FALSE
687.2	Localized superficial swelling, mass, or lump	dermatologic	53	400	0.0113832	0.0111053	1.02531	0.864977	0.953823	0.937821	0.669913	0.969404	FALSE
611.3	Lump or mass in breast	genitourinary	244	1083	0.0524055	0.0300675	1.78402	1.60382e-15	3.25067e-14	1.49444	8.70392e-08	1.18573e-06	FALSE
289.4	Lymphadenitis	hematopoietic	92	445	0.0197595	0.0123546	1.61144	3.67003e-05	0.000283702	1.59287	0.000102379	0.000872581	FALSE
296.22	Major depressive disorder	mental disorders	327	1569	0.070232	0.0435603	1.65854	8.65983e-16	1.79908e-14	1.56925	5.93886e-12	1.12163e-10	FALSE
647.3	Major puerperal infection	pregnancy complications	29	273	0.00622852	0.00757933	0.82066	0.313039	0.595275	0.959367	0.836167	1	FALSE
798	Malaise and fatigue	symptoms	408	1580	0.0876289	0.0438657	2.09348	2.46735e-37	9.76367e-36	1.9811	5.47018e-30	2.11429e-28	FALSE
174.11	Malignant neoplasm of female breast	neoplasms	23	75	0.00493986	0.00208223	2.3792	0.000284832	0.00181376	1.6973	0.0336914	0.125269	FALSE
652	Malposition and malpresentation of fetus or obstruction	pregnancy complications	444	6101	0.0953608	0.169383	0.516923	4.0421e-37	1.56232e-35	0.494476	1.41878e-40	7.36879e-39	FALSE
613.5	Mastodynia	genitourinary	159	833	0.0341495	0.0231267	1.49348	5.13833e-06	4.61617e-05	1.40646	0.00017022	0.00136012	FALSE
658	Maternal complication of pregnancy affecting fetus or newborn	pregnancy complications	85	1069	0.018256	0.0296788	0.607963	1.22304e-05	0.000101913	0.605057	1.51293e-05	0.000152393	FALSE
857	Mechanical complication of unspecified genitourinary device, implant, and graft	injuries & poisonings	40	220	0.00859107	0.00610789	1.41008	0.0464802	0.143588	1.5258	0.017772	0.0742136	FALSE
292.3	Memory loss	mental disorders	17	33	0.0036512	0.000916183	3.99617	3.58597e-06	3.34825e-05	3.38227	0.000125062	0.00102897	FALSE
306.1	Mental disorders durring/after pregnancy	mental disorders	252	2883	0.0541237	0.0800411	0.657671	5.74723e-10	8.37886e-09	0.628659	1.96334e-11	3.5858e-10	FALSE
593.2	Microscopic hematuria	genitourinary	24	107	0.00515464	0.00297065	1.739	0.0145271	0.05628	1.69098	0.0247249	0.0973762	FALSE
340.1	Migrain with aura	neurological	82	337	0.0176117	0.00935617	1.89818	2.43092e-07	2.65801e-06	1.85867	1.36124e-06	1.58209e-05	FALSE
340	Migraine	neurological	323	1516	0.0693729	0.0420889	1.69657	7.30326e-17	1.59711e-15	1.64909	2.59088e-14	5.89869e-13	FALSE
262	Mineral deficiency NEC	endocrine/metabolic	26	101	0.00558419	0.00280408	1.99702	0.00170558	0.00891409	1.80683	0.00926068	0.0431913	FALSE
634	Miscarriage; stillbirth	pregnancy complications	2871	37	0.616624	0.00102724	1564.15	0	0	1975.63	0	0	FALSE
626.21	Mittelschmerz	genitourinary	12	25	0.00257732	0.000694078	3.72031	0.000185969	0.00121208	3.92135	0.000154191	0.00124401	FALSE
272.13	Mixed hyperlipidemia	endocrine/metabolic	22	82	0.00472509	0.00227658	2.08063	0.00232641	0.011646	1.55999	0.0735346	0.220206	FALSE
296	Mood disorders	mental disorders	28	141	0.00601375	0.0039146	1.53948	0.0375816	0.122954	1.47238	0.07108	0.216139	FALSE
278.11	Morbid obesity	endocrine/metabolic	104	665	0.0223368	0.0184625	1.21464	0.0681803	0.199851	1.31834	0.0126297	0.0561244	FALSE
622.2	Mucous polyp of cervix	genitourinary	41	179	0.00880584	0.0049696	1.7788	0.000923068	0.00520047	1.32909	0.110228	0.303452	FALSE
651	Multiple gestation	pregnancy complications	190	633	0.0408076	0.0175741	2.37828	8.18666e-25	2.30614e-23	2.20867	2.11354e-19	6.0564e-18	FALSE
335	Multiple sclerosis	neurological	12	57	0.00257732	0.0015825	1.63026	0.124305	0.318936	1.2939	0.430706	0.742708	FALSE
772.3	Muscle weakness	symptoms	31	139	0.00665808	0.00385907	1.73017	0.00593145	0.0260795	1.8662	0.00255258	0.0144569	FALSE
771	Musculoskeletal symptoms referable to limbs	symptoms	21	169	0.00451031	0.00469197	0.961108	0.864176	0.953823	0.820571	0.409028	0.71937	FALSE
770	Myalgia and myositis unspecified	symptoms	83	444	0.0178265	0.0123268	1.45425	0.00190333	0.00982401	1.54293	0.000537342	0.00372109	FALSE
117	Mycoses	infectious diseases	12	59	0.00257732	0.00163802	1.57491	0.151987	0.363457	1.32661	0.386143	0.692385	FALSE
200	Myeloproliferative disease	neoplasms	20	76	0.00429553	0.00211	2.04027	0.00462611	0.0214765	2.02403	0.00697958	0.0339183	FALSE
367.1	Myopia	sense organs	116	725	0.0249141	0.0201283	1.24384	0.031129	0.104307	1.09952	0.359122	0.670629	FALSE
471	Nasal polyps	respiratory	13	34	0.0027921	0.000943946	2.96338	0.00087604	0.00496921	2.75626	0.00278423	0.0155263	FALSE
789	Nausea and vomiting	symptoms	477	3089	0.102448	0.0857603	1.2168	0.000154628	0.00103626	1.45952	2.35716e-12	4.55534e-11	FALSE
199	Neoplasm of uncertain behavior	neoplasms	56	254	0.0120275	0.00705183	1.71417	0.000283186	0.00181021	1.42399	0.0209018	0.0843175	FALSE
173	Neoplasm of uncertain behavior of skin	neoplasms	96	520	0.0206186	0.0144368	1.43721	0.00122565	0.00674515	1.15419	0.213062	0.475532	FALSE
766	Neuralgia, neuritis, and radiculitis NOS	symptoms	25	117	0.00536942	0.00324829	1.65653	0.0223137	0.080796	1.22197	0.379611	0.688893	FALSE
288.11	Neutropenia	hematopoietic	15	57	0.00322165	0.0015825	2.03915	0.0142122	0.0553176	1.96102	0.0262109	0.102742	FALSE
217.1	Nevus, non-neoplastic	neoplasms	100	430	0.0214777	0.0119381	1.81662	1.0153e-07	1.18834e-06	1.3946	0.00400811	0.0212827	FALSE
769	Nonallopathic lesions NEC	symptoms	10	31	0.00214777	0.000860657	2.49872	0.0118754	0.047559	2.08983	0.0494938	0.171016	FALSE
558	Noninfectious gastroenteritis	digestive	94	457	0.020189	0.0126877	1.6034	3.64134e-05	0.000282799	1.79478	8.31512e-07	1.01616e-05	FALSE
619.3	Noninflammatory disorders of cervix	genitourinary	152	637	0.032646	0.0176851	1.87451	7.07087e-12	1.12998e-10	1.75139	2.89914e-09	4.50315e-08	FALSE
619.1	Noninflammatory disorders of ovary, fallopian tube, and broad ligament	genitourinary	207	475	0.0444588	0.0131875	3.48161	5.31512e-49	3.15491e-47	2.7627	3.55264e-30	1.40583e-28	FALSE
619.4	Noninflammatory disorders of vagina	genitourinary	474	1853	0.101804	0.0514451	2.08984	2.1416e-42	1.04686e-40	2.31397	2.56723e-50	1.77781e-48	FALSE
619.5	Noninflammatory disorders of vulva and perineum	genitourinary	50	309	0.0107388	0.00857881	1.25452	0.138938	0.348813	1.1328	0.42788	0.742313	FALSE
619	Noninflammatory female genital disorders	genitourinary	135	306	0.0289948	0.00849552	3.48501	6.91663e-33	2.39488e-31	3.34309	4.03702e-28	1.36929e-26	FALSE
395.1	Nonrheumatic mitral valve disorders	circulatory system	40	158	0.00859107	0.00438657	1.9668	0.000140849	0.000963339	1.6921	0.00399964	0.0212827	FALSE
579.8	Nonspecific abnormal findings in stool contents	digestive	25	108	0.00536942	0.00299842	1.79502	0.00855436	0.035722	1.56215	0.0518921	0.175144	FALSE
793	Nonspecific abnormal findings on radiological and other examination of musculoskeletal system	symptoms	16	69	0.00343643	0.00191566	1.7966	0.035014	0.116154	1.76799	0.0496881	0.171331	FALSE
793.2	Nonspecific abnormal findings on radiological and other examination of other intrathoracic organs (echocardiogram, etc)	symptoms	42	222	0.00902062	0.00616341	1.46779	0.023155	0.0835507	1.35592	0.0801766	0.234601	FALSE
418	Nonspecific chest pain	circulatory system	296	1616	0.0635739	0.0448652	1.44531	1.64149e-08	2.05124e-07	1.61463	2.06692e-12	4.04144e-11	FALSE
573.6	Nonspecific elevation of levels of transaminase or lactic acid dehydrogenase [LDH]	digestive	38	197	0.00816151	0.00546934	1.49628	0.0234727	0.0837488	1.57364	0.013406	0.0589438	FALSE
790	Nonspecific findings on examination of blood	symptoms	15	44	0.00322165	0.00122158	2.64258	0.00117148	0.00646844	2.48197	0.00377977	0.0201993	FALSE
241.2	Nontoxic multinodular goiter	endocrine/metabolic	39	135	0.00837629	0.00374802	2.24529	9.29932e-06	7.84542e-05	1.8741	0.000792993	0.00527182	FALSE
241	Nontoxic nodular goiter	endocrine/metabolic	33	105	0.00708763	0.00291513	2.44154	8.22656e-06	6.97579e-05	2.16193	0.000190724	0.00148819	FALSE
241.1	Nontoxic uninodular goiter	endocrine/metabolic	76	301	0.016323	0.0083567	1.9691	1.61352e-07	1.81193e-06	1.52566	0.00154884	0.00939479	FALSE
650	Normal delivery	pregnancy complications	176	6834	0.0378007	0.189733	0.167772	6.75208e-116	7.01372e-114	0.173256	2.54691e-109	3.84815e-107	FALSE
278.1	Obesity	endocrine/metabolic	377	2103	0.0809708	0.0583859	1.4209	1.61516e-09	2.237e-08	1.54788	9.55568e-13	1.93677e-11	FALSE
300.3	Obsessive-compulsive disorders	mental disorders	12	62	0.00257732	0.00172131	1.49858	0.200161	0.437477	1.47324	0.229454	0.50112	FALSE
665	Obstetrical/birth trauma	pregnancy complications	404	16507	0.0867698	0.458286	0.112311	0	0	0.119865	0	0	FALSE
575.2	Obstruction of bile duct	digestive	29	627	0.00622852	0.0174075	0.353782	4.95867e-08	6.05979e-07	0.411625	4.26217e-06	4.75418e-05	FALSE
327.32	Obstructive sleep apnea	neurological	78	280	0.0167526	0.00777368	2.17472	1.71256e-09	2.35229e-08	1.77328	1.94813e-05	0.000192725	FALSE
871.2	Open wound of finger(s)	injuries & poisonings	29	209	0.00622852	0.00580249	1.07388	0.719895	0.953823	1.00654	0.974476	1	FALSE
871	Open wounds of extremities	injuries & poisonings	13	92	0.0027921	0.00255421	1.0934	0.763465	0.953823	1.52775	0.164335	0.396984	FALSE
870	Open wounds of head; neck; and trunk	injuries & poisonings	25	97	0.00536942	0.00269302	1.99919	0.00206276	0.0105173	2.19236	0.000857398	0.00565475	FALSE
528.12	Oral aphthae	digestive	11	64	0.00236254	0.00177684	1.33041	0.382295	0.67665	1.15459	0.669135	0.969404	FALSE
327.41	Organic or persistent insomnia	neurological	14	58	0.00300687	0.00161026	1.86994	0.0358117	0.117394	1.35859	0.323715	0.628521	FALSE
458.1	Orthostatic hypotension	circulatory system	15	96	0.00322165	0.00266526	1.20943	0.494099	0.792786	1.41413	0.223348	0.492966	FALSE
740.9	Osteoarthrosis NOS	musculoskeletal	25	90	0.00536942	0.00249868	2.1551	0.000703329	0.0040308	1.65305	0.0311721	0.118283	FALSE
740.11	Osteoarthrosis, localized, primary	musculoskeletal	23	77	0.00493986	0.00213776	2.31727	0.00041708	0.00254848	1.61874	0.05158	0.174982	FALSE
743.9	Osteopenia or other disorder of bone and cartilage	musculoskeletal	27	132	0.00579897	0.00366473	1.58577	0.0294828	0.0995942	1.35714	0.161478	0.392937	FALSE
382	Otalgia	sense organs	83	508	0.0178265	0.0141037	1.26875	0.0462538	0.143154	1.41391	0.00506886	0.0260819	FALSE
790.6	Other abnormal blood chemistry	symptoms	249	823	0.0534794	0.0228491	2.41629	1.04036e-32	3.52875e-31	2.2382	7.5309e-26	2.50327e-24	FALSE
250.42	Other abnormal glucose	endocrine/metabolic	220	690	0.0472509	0.0191566	2.5393	4.44729e-32	1.47828e-30	2.25178	5.67793e-23	1.71577e-21	FALSE
599.9	Other abnormality of urination	genitourinary	80	293	0.0171821	0.0081346	2.13167	2.61219e-09	3.54813e-08	2.16686	4.00765e-09	6.11074e-08	FALSE
738	Other acquired musculoskeletal deformity	musculoskeletal	15	62	0.00322165	0.00172131	1.87444	0.029229	0.0989382	1.66645	0.0837271	0.242429	FALSE
795	Other and nonspecific abnormal cytological, histological and immunological findings	symptoms	44	295	0.00945017	0.00819012	1.15532	0.373889	0.667562	0.989541	0.949626	1	FALSE
286.7	Other and unspecified coagulation defects	hematopoietic	38	95	0.00816151	0.0026375	3.11165	3.75818e-09	4.95722e-08	3.14276	1.1632e-08	1.74166e-07	FALSE
654	Other and unspecified complications of birth; puerperium affecting management of mother	pregnancy complications	114	1711	0.0244845	0.0475027	0.503272	2.45596e-12	4.16511e-11	0.290875	7.36453e-35	3.39996e-33	FALSE
759	Other and unspecified congenital anomalies	congenital anomalies	141	1162	0.0302835	0.0322608	0.936796	0.470975	0.77732	0.956808	0.635475	0.944872	FALSE
285	Other anemias	hematopoietic	324	3090	0.0695876	0.0857881	0.797034	0.00018069	0.00118231	0.802782	0.000408018	0.00294837	FALSE
215	Other benign neoplasm of connective and other soft tissue	neoplasms	95	379	0.0204038	0.0105222	1.95867	6.44126e-09	8.2349e-08	1.30345	0.0268697	0.10483	FALSE
571.5	Other chronic nonalcoholic liver disease	digestive	69	424	0.0148196	0.0117716	1.26283	0.0743219	0.211512	1.40574	0.011358	0.0512963	FALSE
646	Other complications of pregnancy NEC	pregnancy complications	1077	11199	0.231314	0.310919	0.666924	1.63563e-28	4.94257e-27	0.745228	5.8308e-15	1.3844e-13	FALSE
674	Other complications of the puerperium NEC	pregnancy complications	117	1637	0.0251289	0.0454482	0.541387	2.50655e-10	3.75305e-09	0.548872	1.1991e-09	1.95382e-08	FALSE
348.9	Other conditions of brain, NOS	neurological	24	83	0.00515464	0.00230434	2.24334	0.000504679	0.00301718	2.10875	0.00202348	0.0118161	FALSE
649	Other conditions or status of the mother complicating pregnancy, childbirth, or the puerperium	pregnancy complications	1135	15238	0.243771	0.423054	0.439611	6.97085e-117	7.7237e-115	0.439927	4.69659e-111	7.80574e-109	FALSE
742.9	Other derangement of joint	musculoskeletal	42	275	0.00902062	0.00763486	1.18316	0.312158	0.594281	1.04153	0.810764	1	FALSE
289	Other diseases of blood and blood-forming organs	hematopoietic	28	122	0.00601375	0.0033871	1.78018	0.00605956	0.0265647	1.67259	0.0177171	0.074171	FALSE
510	Other diseases of lung	respiratory	19	71	0.00408076	0.00197118	2.07459	0.00479966	0.0221129	1.96955	0.0120248	0.0537235	FALSE
519.8	Other diseases of respiratory system, NEC	respiratory	14	71	0.00300687	0.00197118	1.527	0.148315	0.356213	1.42809	0.238769	0.515964	FALSE
525	Other diseases of the teeth and supporting structures	digestive	24	154	0.00515464	0.00427552	1.20668	0.393138	0.690212	1.82779	0.00821882	0.0389157	FALSE
575.8	Other disorders of biliary tract	digestive	14	131	0.00300687	0.00363697	0.82623	0.497836	0.797113	1.0109	0.970088	1	FALSE
733	Other disorders of bone and cartilage	musculoskeletal	30	174	0.0064433	0.00483078	1.33596	0.144111	0.356213	1.18899	0.397369	0.70333	FALSE
723	Other disorders of cervical region	musculoskeletal	16	46	0.00343643	0.0012771	2.69663	0.000642645	0.00374763	2.30207	0.00586563	0.0294985	FALSE
388	Other disorders of ear	sense organs	35	150	0.00751718	0.00416447	1.81117	0.00161449	0.00851837	1.48529	0.0413881	0.146667	FALSE
379	Other disorders of eye	sense organs	15	109	0.00322165	0.00302618	1.0648	0.819932	0.953823	1.03445	0.904292	1	FALSE
374	Other disorders of eyelids	sense organs	31	123	0.00665808	0.00341486	1.9561	0.000872958	0.00496869	1.76047	0.00670248	0.0328599	FALSE
575.7	Other disorders of gallbladder	digestive	10	65	0.00214777	0.0018046	1.19057	0.60797	0.907858	1.36187	0.376895	0.688893	FALSE
569	Other disorders of intestine	digestive	19	115	0.00408076	0.00319276	1.27927	0.320925	0.60196	1.1597	0.560461	0.883763	FALSE
573	Other disorders of liver	digestive	38	222	0.00816151	0.00616341	1.32685	0.108585	0.28875	1.30109	0.146537	0.372392	FALSE
277	Other disorders of metabolism	endocrine/metabolic	28	102	0.00601375	0.00283184	2.13042	0.000406998	0.00249605	2.30351	0.000173318	0.00137825	FALSE
568	Other disorders of peritoneum	digestive	24	59	0.00515464	0.00163802	3.15799	2.1387e-06	2.12845e-05	3.15573	5.62418e-06	6.10941e-05	FALSE
729	Other disorders of soft tissues	musculoskeletal	59	312	0.0126718	0.0086621	1.46885	0.00710483	0.0305122	1.37537	0.0306229	0.117001	FALSE
537	Other disorders of stomach and duodenum	digestive	26	122	0.00558419	0.0033871	1.65231	0.0204078	0.0757093	1.49311	0.0717136	0.216706	FALSE
727	Other disorders of synovium, tendon, and bursa	musculoskeletal	10	33	0.00214777	0.000916183	2.34715	0.018206	0.0688519	1.86059	0.100624	0.282018	FALSE
676	Other disorders of the breast associated with childbirth and disorders of lactation	pregnancy complications	66	879	0.0141753	0.0244038	0.574836	1.66462e-05	0.00013696	0.516273	4.08291e-07	5.28865e-06	FALSE
586	Other disorders of the kidney and ureters	genitourinary	48	433	0.0103093	0.0120214	0.856091	0.309588	0.590741	0.929261	0.639085	0.944982	FALSE
246	Other disorders of thyroid	endocrine/metabolic	167	608	0.0358677	0.01688	2.16671	3.08547e-18	7.02474e-17	1.72362	2.75628e-09	4.32164e-08	FALSE
694.2	Other dyschromia	dermatologic	190	810	0.0408076	0.0224881	1.84928	7.26055e-14	1.35585e-12	1.53165	4.72461e-07	6.00548e-06	FALSE
512.9	Other dyspnea	respiratory	109	461	0.0234107	0.0127988	1.849	1.13683e-08	1.43138e-07	1.72683	1.03017e-06	1.21428e-05	FALSE
259	Other endocrine disorders	endocrine/metabolic	60	93	0.0128866	0.00258197	5.04309	2.29211e-22	6.14432e-21	4.39226	2.29647e-17	6.05831e-16	FALSE
414	Other forms of chronic heart disease	circulatory system	32	185	0.00687285	0.00513618	1.34047	0.127161	0.324358	1.30671	0.176275	0.414971	FALSE
339	Other headache syndromes	neurological	388	2303	0.0833333	0.0639385	1.33091	5.88812e-07	6.1937e-06	1.57126	4.45695e-14	1.00101e-12	FALSE
282.8	Other hemoglobinopathies	hematopoietic	64	442	0.0137457	0.0122713	1.12183	0.393279	0.690212	0.956352	0.746422	1	FALSE
638	Other high-risk pregnancy	pregnancy complications	2497	14989	0.536297	0.416141	1.62268	4.75598e-54	3.16178e-52	1.18091	9.47177e-07	1.13252e-05	FALSE
401.3	Other hypertensive complications	circulatory system	29	166	0.00622852	0.00460868	1.35368	0.133584	0.336388	1.22405	0.330654	0.633849	FALSE
701	Other hypertrophic and atrophic conditions of skin	dermatologic	101	478	0.0216924	0.0132708	1.64867	6.21342e-06	5.46386e-05	1.31303	0.0169364	0.0720268	FALSE
1019	Other ill-defined and unknown causes of morbidity and mortality	NULL	2114	17838	0.454038	0.495239	0.84762	1.23682e-07	1.41766e-06	0.842	1.01712e-07	1.37436e-06	FALSE
279.7	Other immunological findings	endocrine/metabolic	51	83	0.0109536	0.00230434	4.79504	1.68438e-18	3.94288e-17	4.60976	3.68203e-16	9.41466e-15	FALSE
136	Other infectious and parasitic diseases	infectious diseases	17	72	0.0036512	0.00199895	1.82959	0.0253171	0.0885831	1.80299	0.0336886	0.125269	FALSE
686	Other local infections of skin and subcutaneous tissue	dermatologic	36	157	0.00773196	0.00435881	1.7799	0.00187742	0.00972672	1.68224	0.00652409	0.032271	FALSE
598.9	Other nonspecific findings on examination of urine	genitourinary	123	942	0.0264175	0.0261529	1.01039	0.915243	0.953823	1.11843	0.262633	0.545423	FALSE
870.3	Other open wound of head and face	injuries & poisonings	11	72	0.00236254	0.00199895	1.18233	0.605321	0.906907	1.35634	0.364831	0.67714	FALSE
656	Other perinatal conditions of fetus or newborn	pregnancy complications	1061	10171	0.227878	0.282379	0.750032	5.84435e-15	1.15635e-13	0.757214	1.96138e-13	4.07477e-12	FALSE
351	Other peripheral nerve disorders	neurological	95	535	0.0204038	0.0148533	1.38147	0.00405358	0.0193039	1.1337	0.277243	0.565372	FALSE
505	Other pulmonary inflamation or edema	respiratory	10	53	0.00214777	0.00147145	1.46062	0.272314	0.536238	1.27455	0.494691	0.814723	FALSE
362	Other retinal disorders	sense organs	21	118	0.00451031	0.00327605	1.37846	0.17629	0.39847	1.21743	0.419742	0.732785	FALSE
613.7	Other signs and symptoms in breast	genitourinary	39	219	0.00837629	0.00608012	1.38084	0.0644295	0.190154	1.16909	0.386659	0.692385	FALSE
427.3	Other specified cardiac dysrhythmias	circulatory system	95	548	0.0204038	0.0152142	1.34821	0.0077712	0.0328645	1.5201	0.000305835	0.0022591	FALSE
751.22	Other specified congenital anomalies of kidney	congenital anomalies	14	90	0.00300687	0.00249868	1.204	0.518775	0.822774	1.20415	0.529284	0.851568	FALSE
704.8	Other specified diseases of hair and hair follicles	dermatologic	49	185	0.0105241	0.00513618	2.06016	7.55272e-06	6.50395e-05	1.86373	0.000208993	0.00158606	FALSE
706.8	Other specified diseases of sebaceous glands	dermatologic	47	150	0.0100945	0.00416447	2.43848	1.10117e-07	1.27093e-06	1.99394	7.37668e-05	0.000650201	FALSE
279.8	Other specified disorders involving the immune mechanism	endocrine/metabolic	10	53	0.00214777	0.00147145	1.46062	0.272314	0.536238	1.1533	0.686897	0.98371	FALSE
613.8	Other specified disorders of breast	genitourinary	29	120	0.00622852	0.00333158	1.87499	0.00245132	0.012182	1.37718	0.139351	0.357962	FALSE
695.8	Other specified erythematous conditions	dermatologic	16	49	0.00343643	0.00136039	2.53132	0.00127848	0.00696669	2.50747	0.00185098	0.0109478	FALSE
535.8	Other specified gastritis	digestive	10	38	0.00214777	0.001055	2.03803	0.0453543	0.140895	2.07189	0.0492537	0.170541	FALSE
842	Other sprains and strains	injuries & poisonings	18	96	0.00386598	0.00266526	1.45226	0.14706	0.356213	1.61164	0.0722301	0.21787	FALSE
1005	Other symptoms	NULL	74	355	0.0158935	0.00985591	1.62248	0.000170698	0.00113817	1.64541	0.000203725	0.00156463	FALSE
579	Other symptoms involving abdomen and pelvis	digestive	41	175	0.00880584	0.00485855	1.81966	0.000589557	0.00348699	1.64759	0.00539156	0.027487	FALSE
599.8	Other symptoms involving urinary system	genitourinary	80	274	0.0171821	0.0076071	2.2807	1.20343e-10	1.81827e-09	2.26875	6.76118e-10	1.14664e-08	FALSE
724.8	Other symptoms referable to back	musculoskeletal	21	80	0.00451031	0.00222105	2.03538	0.00382039	0.0182983	1.82814	0.0169986	0.0720708	FALSE
599	Other symptoms/disorders or the urinary system	genitourinary	49	95	0.0105241	0.0026375	4.02197	3.22271e-15	6.45318e-14	4.1132	1.97683e-14	4.62745e-13	FALSE
1010	Other tests	NULL	632	7661	0.135739	0.212693	0.581365	6.62101e-34	2.3413e-32	0.585045	7.08e-32	3.01717e-30	FALSE
479	Other upper respiratory disease	respiratory	175	875	0.0375859	0.0242927	1.56858	9.33358e-08	1.10803e-06	1.56726	2.90433e-07	3.80078e-06	FALSE
452	Other venous embolism and thrombosis	circulatory system	20	82	0.00429553	0.00227658	1.89066	0.0108043	0.0442414	1.6472	0.0548267	0.182244	FALSE
281.12	Other vitamin B12 deficiency anemia	hematopoietic	12	45	0.00257732	0.00124934	2.06569	0.0257231	0.0896264	1.88934	0.0554602	0.182524	FALSE
380.1	Otitis externa	sense organs	32	239	0.00687285	0.00663539	1.03604	0.851329	0.953823	1.01704	0.93057	1	FALSE
381.1	Otitis media	sense organs	34	144	0.00730241	0.00399789	1.83265	0.00154369	0.00822313	1.89544	0.00128514	0.00812131	FALSE
628	Ovarian cyst	genitourinary	736	1930	0.158076	0.0535828	3.31626	1.22346e-146	2.54174e-144	3.0675	6.17468e-118	1.14026e-115	FALSE
256	Ovarian dysfunction	endocrine/metabolic	133	117	0.0285653	0.00324829	9.02314	1.80599e-66	1.36434e-64	5.05373	8.37256e-34	3.76087e-32	FALSE
625	Pain and other symptoms associated with female genital organs	genitourinary	331	1119	0.0710911	0.0310669	2.38692	2.50898e-41	1.19141e-39	2.59677	3.7238e-45	2.13413e-43	FALSE
745	Pain in joint	musculoskeletal	536	2678	0.11512	0.0743496	1.6197	6.44246e-22	1.67303e-20	1.46622	1.75988e-13	3.7499e-12	FALSE
773	Pain in limb	symptoms	339	1677	0.0728093	0.0465588	1.60809	1.36831e-14	2.64434e-13	1.51442	9.33817e-11	1.65107e-09	FALSE
379.9	Pain, swelling or discharge of eye	sense organs	48	228	0.0103093	0.00632999	1.63519	0.00205844	0.0105173	1.69989	0.00135364	0.00839956	FALSE
512.2	Painful respiration	respiratory	59	310	0.0126718	0.00860657	1.47841	0.00622058	0.0271354	1.56139	0.00275284	0.0154048	FALSE
782.6	Pallor and flushing	symptoms	23	51	0.00493986	0.00141592	3.50116	6.37711e-07	6.66588e-06	3.02768	2.40163e-05	0.000236184	FALSE
427.9	Palpitations	circulatory system	230	976	0.0493986	0.0270968	1.86581	9.20906e-17	1.98772e-15	1.78196	1.04722e-13	2.29011e-12	FALSE
792.1	Papanicolaou smear of cervix or vagina with atypical squamous cells	genitourinary	180	958	0.0386598	0.0265971	1.47177	3.02618e-06	2.92414e-05	1.40859	5.82822e-05	0.000541146	FALSE
327.5	Parasomnia	neurological	10	24	0.00214777	0.000666315	3.22814	0.00186516	0.00971754	3.30542	0.00253994	0.0144568	FALSE
427.11	Paroxysmal supraventricular tachycardia	circulatory system	28	178	0.00601375	0.00494184	1.21822	0.333017	0.613608	1.3114	0.195882	0.450908	FALSE
427.12	Paroxysmal ventricular tachycardia	circulatory system	14	61	0.00300687	0.00169355	1.77782	0.0525111	0.160725	1.73737	0.0711359	0.216139	FALSE
345.12	Partial epilepsy	neurological	10	46	0.00214777	0.0012771	1.68322	0.135992	0.341934	1.35816	0.398007	0.703692	FALSE
614.33	Pelvic inflammatory disease, NOS	genitourinary	36	75	0.00773196	0.00208223	3.73444	9.22488e-11	1.43287e-09	5.65035	3.39771e-15	8.18404e-14	FALSE
614.1	Pelvic peritoneal adhesions, female (postoperative) (postinfection)	genitourinary	48	332	0.0103093	0.00921736	1.1197	0.466355	0.77046	1.00012	0.999383	1	FALSE
531.4	Peptic ulcer, site unspecified	digestive	14	37	0.00300687	0.00102724	2.93296	0.000614776	0.00359774	3.66277	0.000105252	0.000892494	FALSE
522.5	Periapical abscess	digestive	10	55	0.00214777	0.00152697	1.40743	0.320648	0.60196	1.91525	0.070961	0.216139	FALSE
420.2	Pericarditis	circulatory system	11	54	0.00236254	0.00149921	1.57722	0.168838	0.387582	1.67806	0.1344	0.348475	FALSE
726	Peripheral enthesopathies and allied syndromes	musculoskeletal	44	151	0.00945017	0.00419223	2.26618	1.97937e-06	1.98479e-05	1.58665	0.00942846	0.0437713	FALSE
386.2	Peripheral or central vertigo	sense organs	36	167	0.00773196	0.00463644	1.67285	0.00527058	0.0234217	1.45073	0.050669	0.17292	FALSE
362.6	Peripheral retinal degenerations	sense organs	14	55	0.00300687	0.00152697	1.9721	0.0234819	0.0837488	1.73088	0.0753022	0.223886	FALSE
568.1	Peritoneal adhesions (postoperative) (postinfection)	digestive	14	149	0.00300687	0.00413671	0.726053	0.252695	0.519133	0.659573	0.143019	0.366253	FALSE
313	Pervasive developmental disorders	mental disorders	14	72	0.00300687	0.00199895	1.50575	0.161738	0.374387	1.3709	0.295981	0.587017	FALSE
451	Phlebitis and thrombophlebitis	circulatory system	10	31	0.00214777	0.000860657	2.49872	0.0118754	0.047559	2.46475	0.0155057	0.0669364	FALSE
300.13	Phobia	mental disorders	17	78	0.0036512	0.00216552	1.68857	0.0507095	0.155497	1.58457	0.0963476	0.272793	FALSE
253.1	Pituitary hyperfunction	endocrine/metabolic	85	127	0.018256	0.00352592	5.25535	5.81391e-32	1.89465e-30	4.1443	3.84588e-22	1.1414e-20	FALSE
696.3	Pityriasis	dermatologic	12	66	0.00257732	0.00183237	1.4076	0.276556	0.542664	1.28107	0.443814	0.75731	FALSE
635.3	Placenta previa and abruptio placenta	pregnancy complications	192	2875	0.0412371	0.079819	0.495843	3.48261e-20	8.51192e-19	0.514396	1.02793e-17	2.80069e-16	FALSE
507	Pleurisy; pleural effusion	respiratory	32	180	0.00687285	0.00499736	1.37789	0.0958388	0.26198	1.32979	0.153738	0.383303	FALSE
480	Pneumonia	respiratory	53	195	0.0113832	0.00541381	2.11531	1.49462e-06	1.52397e-05	1.94465	4.40074e-05	0.000417944	FALSE
256.4	Polycystic ovaries	endocrine/metabolic	391	847	0.0839777	0.0235154	3.8069	3.86486e-99	3.77847e-97	3.75747	2.0015e-90	2.21766e-88	FALSE
622.1	Polyp of corpus uteri	genitourinary	272	271	0.0584192	0.00752381	8.18429	4.21498e-128	6.36845e-126	5.75686	6.42752e-83	6.28385e-81	FALSE
627.3	Postmenopausal atrophic vaginitis	genitourinary	19	125	0.00408076	0.00347039	1.1766	0.509808	0.81393	0.922918	0.750902	1	FALSE
475.9	Postnasal drip	respiratory	27	145	0.00579897	0.00402565	1.44307	0.0809822	0.228123	1.17382	0.459171	0.771896	FALSE
80	Postoperative infection	infectious diseases	13	77	0.0027921	0.00213776	1.30694	0.372639	0.666958	1.4665	0.216665	0.482058	FALSE
300.9	Posttraumatic stress disorder	mental disorders	44	188	0.00945017	0.00521947	1.8183	0.000378411	0.00233799	1.78588	0.00102432	0.00667618	FALSE
418.1	Precordial pain	circulatory system	25	87	0.00536942	0.00241539	2.2296	0.00042329	0.00257695	2.59725	6.37737e-05	0.000579926	FALSE
642.1	Preeclampsia and eclampsia	pregnancy complications	160	3040	0.0343643	0.0843999	0.386062	1.10207e-30	3.52238e-29	0.391756	8.52037e-29	3.07845e-27	FALSE
427.6	Premature beats	circulatory system	33	153	0.00708763	0.00424776	1.67333	0.00750875	0.0318356	1.50291	0.0399211	0.143302	FALSE
627.5	Premature menopause and other ovarian failure	genitourinary	106	122	0.0227663	0.0033871	6.85477	5.44818e-47	2.82965e-45	3.40448	2.05118e-18	5.68176e-17	FALSE
627.4	Premenopausal menorrhagia	genitourinary	30	60	0.0064433	0.00166579	3.88662	1.39249e-09	1.9951e-08	3.23367	6.03289e-07	7.48258e-06	FALSE
626.4	Premenstrual tension syndromes	genitourinary	27	87	0.00579897	0.00241539	2.40901	6.86139e-05	0.000500159	1.75862	0.0141312	0.0618053	FALSE
286.81	Primary hypercoagulable state	hematopoietic	181	255	0.0388746	0.0070796	5.67272	1.58348e-69	1.25321e-67	4.83083	1.668e-52	1.20531e-50	FALSE
287.31	Primary thrombocytopenia	hematopoietic	20	132	0.00429553	0.00366473	1.17287	0.507248	0.810621	1.10494	0.683985	0.983377	FALSE
425.1	Primary/intrinsic cardiomyopathies	circulatory system	11	111	0.00236254	0.00308171	0.766082	0.399706	0.69656	0.772088	0.423005	0.736762	FALSE
653	Problems associated with amniotic cavity and membranes	pregnancy complications	389	6790	0.0835481	0.188512	0.392438	1.11975e-65	8.09139e-64	0.440197	2.12775e-49	1.41453e-47	FALSE
360.2	Progressive myopia	sense organs	11	38	0.00236254	0.001055	2.24231	0.0184695	0.0696063	1.88626	0.0715482	0.216706	FALSE
618.1	Prolapse of vaginal walls	genitourinary	23	143	0.00493986	0.00397013	1.24547	0.329684	0.610853	0.971575	0.900913	1	FALSE
269	Proteinuria	endocrine/metabolic	35	196	0.00751718	0.00544157	1.38432	0.0774213	0.218834	1.45268	0.0506619	0.17292	FALSE
131	Protozoan infection	infectious diseases	13	48	0.0027921	0.00133263	2.09824	0.0179152	0.0681353	2.44748	0.00611408	0.0304239	FALSE
695.7	Prurigo and Lichen	dermatologic	30	105	0.0064433	0.00291513	2.21815	0.000124352	0.000861139	1.92709	0.00227033	0.0130564	FALSE
698	Pruritus and related conditions	dermatologic	210	1254	0.0451031	0.034815	1.30947	0.000405749	0.00249605	1.27265	0.00210538	0.0121921	FALSE
696.41	Psoriasis vulgaris	dermatologic	38	171	0.00816151	0.00474749	1.72504	0.00245546	0.012182	1.48825	0.0317111	0.120054	FALSE
303.3	Psychogenic disorder	mental disorders	12	59	0.00257732	0.00163802	1.57491	0.151987	0.363457	1.61481	0.149573	0.377037	FALSE
508	Pulmonary collapse; interstitial and compensatory emphysema	respiratory	17	157	0.0036512	0.00435881	0.837065	0.486843	0.788431	0.87817	0.619785	0.935435	FALSE
415.11	Pulmonary embolism and infarction, acute	circulatory system	13	69	0.0027921	0.00191566	1.4588	0.212302	0.456463	1.20269	0.554508	0.877291	FALSE
287	Purpura and other hemorrhagic conditions	hematopoietic	11	13	0.00236254	0.000360921	6.55901	4.48042e-06	4.09146e-05	6.90061	6.4813e-06	6.90508e-05	FALSE
590	Pyelonephritis	genitourinary	74	426	0.0158935	0.0118271	1.34937	0.0182279	0.0688519	2.07318	4.39917e-08	6.14627e-07	FALSE
687.1	Rash and other nonspecific skin eruption	dermatologic	253	1436	0.0543385	0.0398678	1.38382	3.5121e-06	3.31654e-05	1.37338	1.10288e-05	0.000112453	FALSE
443.1	Raynaud's syndrome	circulatory system	23	90	0.00493986	0.00249868	1.98184	0.00348765	0.0169985	1.77127	0.0176402	0.0740352	FALSE
530.14	Reflux esophagitis	digestive	18	76	0.00386598	0.00211	1.83545	0.0207427	0.0767804	1.63382	0.0695387	0.214025	FALSE
555.1	Regional enteritis	digestive	13	77	0.0027921	0.00213776	1.30694	0.372639	0.666958	1.16785	0.614281	0.933213	FALSE
594.8	Renal colic	genitourinary	24	98	0.00515464	0.00272079	1.89918	0.00495844	0.0225779	2.29141	0.000487345	0.00341759	FALSE
599.2	Retention of urine	genitourinary	30	624	0.0064433	0.0173242	0.367852	9.68999e-08	1.14218e-06	0.403061	1.63937e-06	1.87905e-05	FALSE
361	Retinal detachments and defects	sense organs	10	45	0.00214777	0.00124934	1.72067	0.120943	0.31164	1.40933	0.342584	0.654454	FALSE
654.2	Rhesus isoimmunization in pregnancy	pregnancy complications	95	480	0.0204038	0.0133263	1.54215	0.000133289	0.000919193	1.51196	0.00042026	0.00302369	FALSE
714.1	Rheumatoid arthritis	musculoskeletal	22	102	0.00472509	0.00283184	1.67173	0.0291706	0.0989382	1.34385	0.222724	0.492244	FALSE
695.3	Rosacea	dermatologic	39	199	0.00837629	0.00552486	1.52047	0.0171582	0.0661646	1.14726	0.445871	0.759217	FALSE
701.2	Scar conditions and fibrosis of skin	dermatologic	60	297	0.0128866	0.00824565	1.57018	0.00153294	0.00819213	1.32779	0.0531077	0.177239	FALSE
764	Sciatica	symptoms	81	543	0.0173969	0.0150754	1.15672	0.225583	0.482521	1.10533	0.415091	0.727723	FALSE
706.2	Sebaceous cyst	dermatologic	81	373	0.0173969	0.0103556	1.69198	2.08698e-05	0.000169802	1.42401	0.00538006	0.027487	FALSE
690.1	Seborrheic dermatitis	dermatologic	93	319	0.0199742	0.00885644	2.28092	4.04226e-12	6.65171e-11	2.01378	1.09182e-08	1.64964e-07	FALSE
702.2	Seborrheic keratosis	dermatologic	97	386	0.0208333	0.0107166	1.96412	3.92688e-09	5.13896e-08	1.39567	0.00475744	0.0247864	FALSE
244.1	Secondary hypothyroidism	endocrine/metabolic	35	172	0.00751718	0.00477526	1.57854	0.0141623	0.0552529	1.29963	0.168272	0.403833	FALSE
287.32	Secondary thrombocytopenia	hematopoietic	26	508	0.00558419	0.0141037	0.392547	3.53708e-06	3.32126e-05	0.393237	4.80847e-06	5.32779e-05	FALSE
389.1	Sensorineural hearing loss	sense organs	11	81	0.00236254	0.00224881	1.05069	0.877838	0.953823	0.843093	0.604411	0.929261	FALSE
994.2	Sepsis	injuries & poisonings	25	139	0.00536942	0.00385907	1.39349	0.127649	0.324393	1.58852	0.0407933	0.14549	FALSE
470	Septal Deviations/Turbinate Hypertrophy	respiratory	45	182	0.00966495	0.00505289	1.92166	9.37372e-05	0.000660132	1.55757	0.0103274	0.0471541	FALSE
38	Septicemia	infectious diseases	21	128	0.00451031	0.00355368	1.27041	0.310414	0.591638	1.43612	0.138516	0.35692	FALSE
90	Sexually transmitted infections (not HIV or hepatitis)	infectious diseases	17	105	0.0036512	0.00291513	1.25343	0.388425	0.684583	1.35744	0.25774	0.541547	FALSE
637	Short gestation; low birth weight; and fetal growth retardation	pregnancy complications	40	611	0.00859107	0.0169633	0.502174	2.6549e-05	0.000211121	0.597375	0.00198993	0.0116864	FALSE
512.7	Shortness of breath	respiratory	223	1289	0.0478952	0.0357867	1.35537	4.22545e-05	0.000320671	1.46962	5.96584e-07	7.45506e-06	FALSE
709.2	Sicca syndrome	dermatologic	13	70	0.0027921	0.00194342	1.43792	0.229751	0.489592	1.23259	0.498303	0.81836	FALSE
240	Simple and unspecified goiter	endocrine/metabolic	36	125	0.00773196	0.00347039	2.23755	2.20129e-05	0.000176741	2.00207	0.000400008	0.00290311	FALSE
819	Skull and face fracture and other intercranial injury	injuries & poisonings	15	73	0.00322165	0.00202671	1.5915	0.101699	0.274388	2.072	0.0130953	0.057884	FALSE
327.3	Sleep apnea	neurological	47	204	0.0100945	0.00566368	1.7903	0.000340018	0.00212727	1.42783	0.0344394	0.127196	FALSE
327	Sleep disorders	neurological	35	144	0.00751718	0.00399789	1.88695	0.000785766	0.00448777	1.59733	0.0169449	0.0720268	FALSE
514.2	Solitary pulmonary nodule	respiratory	27	43	0.00579897	0.00119381	4.88001	1.17451e-10	1.79086e-09	4.18756	3.44472e-08	4.93545e-07	FALSE
772.2	Spasm of muscle	symptoms	39	181	0.00837629	0.00502513	1.67251	0.00370738	0.0179118	1.37524	0.081341	0.236758	FALSE
291.4	Specific nonpsychotic mental disorders due to brain damage	mental disorders	12	50	0.00257732	0.00138816	1.85886	0.0540598	0.164556	2.24731	0.0176081	0.0740352	FALSE
721.1	Spondylosis without myelopathy	musculoskeletal	43	115	0.0092354	0.00319276	2.91025	2.62588e-09	3.54813e-08	2.22999	1.58918e-05	0.000159109	FALSE
287.1	Spontaneous ecchymoses	hematopoietic	10	28	0.00214777	0.000777368	2.76667	0.00578178	0.0256248	2.89545	0.00587366	0.0294985	FALSE
840	Sprains and strains	injuries & poisonings	130	692	0.027921	0.0192121	1.46632	7.79389e-05	0.000553566	1.33678	0.00377337	0.0201993	FALSE
841	Sprains and strains of back and neck	injuries & poisonings	59	234	0.0126718	0.00649657	1.96274	4.17684e-06	3.83531e-05	1.9228	1.8429e-05	0.000183407	FALSE
741.2	Stiffness of joint	musculoskeletal	17	74	0.0036512	0.00205447	1.78005	0.0323226	0.107656	1.52415	0.129478	0.340493	FALSE
41.2	Streptococcus infection	infectious diseases	68	587	0.0146048	0.016297	0.894629	0.38824	0.684583	0.926882	0.565379	0.886472	FALSE
624.9	stress incontinence, female	genitourinary	37	245	0.00794674	0.00680197	1.16965	0.376163	0.668107	0.868163	0.43581	0.746717	FALSE
368.9	Subjective visual disturbances	sense organs	35	127	0.00751718	0.00352592	2.14055	7.08888e-05	0.000514486	2.46066	6.41008e-06	6.90508e-05	FALSE
316	Substance addiction and disorders	mental disorders	51	489	0.0109536	0.0135762	0.804687	0.141924	0.355773	1.10515	0.513259	0.835591	FALSE
297.1	Suicidal ideation	mental disorders	22	134	0.00472509	0.00372026	1.27138	0.297711	0.574694	1.90648	0.00722373	0.0347996	FALSE
681	Superficial cellulitis and abscess	dermatologic	62	323	0.0133162	0.00896749	1.49148	0.00417057	0.0197478	1.65581	0.00048444	0.00341161	FALSE
915	Superficial injury without mention of infection	injuries & poisonings	49	348	0.0105241	0.00966157	1.09022	0.573329	0.868617	1.15153	0.371815	0.685096	FALSE
381.11	Suppurative and unspecified otitis media	sense organs	56	286	0.0120275	0.00794025	1.52102	0.00432307	0.0203539	1.63132	0.00131535	0.00821845	FALSE
427.61	Supraventricular premature beats	circulatory system	19	71	0.00408076	0.00197118	2.07459	0.00479966	0.0221129	1.89	0.0179721	0.0748612	FALSE
771.1	Swelling of limb	symptoms	83	452	0.0178265	0.0125489	1.42819	0.00308589	0.0151738	1.43044	0.00404031	0.0213174	FALSE
293.1	Swelling, mass, or lump in head and neck [Space-occupying lesion, intracranial NOS]	mental disorders	62	307	0.0133162	0.00852328	1.56992	0.00128657	0.00698784	1.5666	0.00202622	0.0118161	FALSE
627.2	Symptomatic menopause	genitourinary	14	24	0.00300687	0.000666315	4.52328	7.35993e-06	6.40429e-05	2.85091	0.00338368	0.0184383	FALSE
687	Symptoms affecting skin	dermatologic	32	116	0.00687285	0.00322052	2.14193	0.000142908	0.000965498	1.97063	0.00107916	0.00696673	FALSE
741	Symptoms and disorders of the joints	musculoskeletal	39	180	0.00837629	0.00499736	1.68185	0.00336756	0.0164614	1.29481	0.158887	0.390059	FALSE
429.3	Symptoms involving cardiovascular system	circulatory system	28	128	0.00601375	0.00355368	1.69645	0.0115275	0.0465018	1.47534	0.073957	0.220676	FALSE
561	Symptoms involving digestive system	digestive	47	218	0.0100945	0.00605236	1.67467	0.0014175	0.00764898	1.43682	0.0292016	0.112606	FALSE
624	Symptoms involving female genital tract	genitourinary	75	375	0.0161082	0.0104112	1.55617	0.00052144	0.00309512	1.91797	9.64728e-07	1.14527e-05	FALSE
519.9	Symptoms involving respiratory system and other chest symptoms	respiratory	20	83	0.00429553	0.00230434	1.86783	0.0123044	0.0488064	1.95534	0.00996915	0.0456515	FALSE
772	Symptoms of the muscles	symptoms	27	219	0.00579897	0.00608012	0.953489	0.815893	0.953823	0.786486	0.247998	0.527076	FALSE
788	Syncope and collapse	symptoms	116	725	0.0249141	0.0201283	1.24384	0.031129	0.104307	1.38838	0.00166718	0.0100393	FALSE
727.1	Synovitis and tenosynovitis	musculoskeletal	71	428	0.0152491	0.0118826	1.2877	0.0501582	0.15409	1.07333	0.592547	0.91687	FALSE
695.42	Systemic lupus erythematosus	dermatologic	33	131	0.00708763	0.00363697	1.95555	0.000598469	0.00352715	2.1005	0.000233111	0.00175308	FALSE
427.7	Tachycardia NOS	circulatory system	135	1123	0.0289948	0.031178	0.927887	0.418187	0.704896	1.19035	0.067373	0.210398	FALSE
704.12	Telogen effluvium	dermatologic	18	73	0.00386598	0.00202671	1.91104	0.0140217	0.054833	1.66264	0.0603966	0.193409	FALSE
526.41	Temporomandibular joint disorder, unspecified	digestive	17	96	0.0036512	0.00266526	1.37128	0.230984	0.491544	1.40195	0.2072	0.468526	FALSE
306.9	Tension headache	mental disorders	28	191	0.00601375	0.00530276	1.13489	0.532991	0.835502	1.26491	0.261691	0.545423	FALSE
763	Thoracic or lumbosacral neuritis or radiculitis, unspecified	symptoms	36	143	0.00773196	0.00397013	1.95492	0.000340465	0.00212727	1.58877	0.0172812	0.0730824	FALSE
636.1	Threatened premature labor	pregnancy complications	116	538	0.0249141	0.0149366	1.68506	4.70681e-07	5.07969e-06	2.09323	8.19369e-12	1.5301e-10	FALSE
478	Throat pain	respiratory	50	240	0.0107388	0.00666315	1.61831	0.00206296	0.0105173	1.95749	4.09197e-05	0.000393113	FALSE
287.3	Thrombocytopenia	hematopoietic	94	1141	0.020189	0.0316777	0.629852	2.02327e-05	0.000165649	0.614234	1.04429e-05	0.000107137	FALSE
193	Thyroid cancer	neoplasms	21	81	0.00451031	0.00224881	2.0102	0.00443296	0.0208124	1.66329	0.0428257	0.150797	FALSE
245	Thyroiditis	endocrine/metabolic	17	48	0.0036512	0.00133263	2.74622	0.000351673	0.00218906	2.33205	0.00347914	0.0188349	FALSE
245.1	Thyroiditis, acute and subacute	endocrine/metabolic	15	26	0.00322165	0.000721841	4.47429	3.91497e-06	3.61482e-05	3.52339	0.00018164	0.00142523	FALSE
242	Thyrotoxicosis with or without goiter	endocrine/metabolic	95	321	0.0204038	0.00891196	2.31634	1.02165e-12	1.7505e-11	2.00393	1.21873e-08	1.8085e-07	FALSE
389.4	Tinnitus	sense organs	31	194	0.00665808	0.00538605	1.23775	0.271692	0.536238	1.11142	0.594586	0.918403	FALSE
318	Tobacco use disorder	mental disorders	61	412	0.0131014	0.0114384	1.14731	0.319617	0.60196	1.333	0.0440528	0.154246	FALSE
291.1	Transient mental disorders due to conditions classified elsewhere	mental disorders	25	245	0.00536942	0.00680197	0.788255	0.258338	0.527467	0.759405	0.199663	0.454574	FALSE
10	Tuberculosis	infectious diseases	15	50	0.00322165	0.00138816	2.32508	0.0042087	0.0198717	2.27126	0.00715971	0.0346033	FALSE
250.1	Type 1 diabetes	endocrine/metabolic	23	128	0.00493986	0.00355368	1.39201	0.145129	0.356213	1.40323	0.149726	0.377037	FALSE
250.2	Type 2 diabetes	endocrine/metabolic	158	1017	0.0339347	0.0282351	1.20895	0.0291156	0.0989382	1.177	0.0700709	0.215264	FALSE
555.2	Ulcerative colitis	digestive	11	90	0.00236254	0.00249868	0.945387	0.860588	0.953823	0.735527	0.346268	0.658323	FALSE
663	Umbilical cord complications during labor and delivery	pregnancy complications	211	6251	0.0453179	0.173547	0.226053	3.13448e-95	2.89417e-93	0.231987	3.08217e-90	3.2016e-88	FALSE
550.4	Umbilical hernia	digestive	19	135	0.00408076	0.00374802	1.08914	0.728006	0.953823	1.11989	0.651839	0.951148	FALSE
709.7	Unspecified diffuse connective tissue disease	dermatologic	38	110	0.00816151	0.00305394	2.68621	1.66474e-07	1.85691e-06	2.55953	1.51578e-06	1.74946e-05	FALSE
695.9	Unspecified erythematous condition	dermatologic	27	112	0.00579897	0.00310947	1.86998	0.00359365	0.017413	1.82789	0.0066196	0.0326462	FALSE
599.4	Urinary incontinence	genitourinary	30	266	0.0064433	0.00738499	0.871659	0.477141	0.783905	0.749374	0.143498	0.366913	FALSE
591	Urinary tract infection	genitourinary	478	2664	0.102663	0.073961	1.43247	6.41559e-12	1.03521e-10	1.58893	1.44532e-17	3.87439e-16	FALSE
947	Urticaria	dermatologic	100	423	0.0214777	0.0117438	1.84704	4.66212e-08	5.73958e-07	1.77063	8.15414e-07	1.00387e-05	FALSE
218.1	Uterine leiomyoma	neoplasms	469	2097	0.10073	0.0582193	1.81198	1.54418e-28	4.75264e-27	1.26328	2.96128e-05	0.000286142	FALSE
614.52	Vaginitis and vulvovaginitis	genitourinary	329	1328	0.0706615	0.0368694	1.98622	4.28451e-27	1.24927e-25	1.97391	1.10939e-24	3.47888e-23	FALSE
747.12	Valvular heart disease/ heart chambers	congenital anomalies	12	105	0.00257732	0.00291513	0.883819	0.685633	0.953823	0.885809	0.697465	0.993304	FALSE
454.1	Varicose veins of lower extremity	circulatory system	15	116	0.00322165	0.00322052	1.00035	0.998981	0.998981	0.739654	0.281601	0.569342	FALSE
454.11	Varicose veins of lower extremity, symptomtic	circulatory system	13	60	0.0027921	0.00166579	1.67804	0.0910654	0.250581	1.30543	0.397029	0.70333	FALSE
671	Venous/cerebrovascular complications embolism in pregnancy and the puerperium	pregnancy complications	110	1514	0.0236254	0.0420334	0.551467	2.65465e-09	3.55809e-08	0.535717	8.03779e-10	1.34938e-08	FALSE
550.5	Ventral hernia	digestive	10	70	0.00214777	0.00194342	1.10537	0.767202	0.953823	1.00852	0.980486	1	FALSE
8.6	Viral Enteritis	infectious diseases	15	89	0.00322165	0.00247092	1.30481	0.341226	0.625267	1.50075	0.160678	0.392715	FALSE
70.2	Viral hepatitis B	infectious diseases	26	184	0.00558419	0.00510842	1.09366	0.670009	0.953823	0.850232	0.449281	0.761944	FALSE
79	Viral infection	infectious diseases	157	858	0.0337199	0.0238208	1.43007	5.0314e-05	0.000373312	1.65464	4.40076e-08	6.14627e-07	FALSE
78	Viral warts & HPV	infectious diseases	166	821	0.0356529	0.0227935	1.58503	1.03219e-07	1.19965e-06	1.39711	0.000181798	0.00142523	FALSE
79.9	Viremia, NOS	infectious diseases	45	284	0.00966495	0.00788473	1.22798	0.202675	0.440899	1.32898	0.0866195	0.249933	FALSE
368	Visual disturbances	sense organs	83	457	0.0178265	0.0126877	1.41236	0.00411851	0.019557	1.49838	0.00119659	0.00764897	FALSE
368.4	Visual field defects	sense organs	11	46	0.00236254	0.0012771	1.85194	0.0666451	0.195696	1.73858	0.110246	0.303452	FALSE
261.2	Vitamin B-complex deficiencies	endocrine/metabolic	47	166	0.0100945	0.00460868	2.20246	1.96114e-06	1.98479e-05	1.94672	0.000106008	0.000894341	FALSE
261.4	Vitamin D deficiency	endocrine/metabolic	468	1445	0.100515	0.0401177	2.67375	6.65963e-70	5.53416e-68	2.31264	1.12748e-47	7.20723e-46	FALSE
694.1	Vitiligo	dermatologic	11	43	0.00236254	0.00119381	1.98131	0.0432284	0.135302	1.54918	0.213495	0.475642	FALSE
473.4	Voice disturbance	respiratory	25	88	0.00536942	0.00244316	2.2042	0.000503011	0.00301718	1.87413	0.00733277	0.0352227	FALSE
512.1	Wheezing	respiratory	43	157	0.0092354	0.00435881	2.12922	1.22639e-05	0.000101913	2.08855	5.0812e-05	0.000477116	FALSE
442.11	Abdominal aortic aneurysm	circulatory system											TRUE
550	Abdominal hernia	digestive											TRUE
790.9	Abnormal arterial blood gases	symptoms											TRUE
512.3	Abnormal chest sounds	respiratory											TRUE
598	Abnormal findings on examination of urine	genitourinary											TRUE
346	Abnormal findings on study of brain and/or nervous system	neurological											TRUE
429.2	Abnormal function study of cardiovascular system	circulatory system											TRUE
781.2	Abnormal posture	symptoms											TRUE
350.5	Abnormal reflex	neurological											TRUE
589	Abnormal results of function study of kidney	genitourinary											TRUE
514.1	Abnormal results of function study of pulmonary system	respiratory											TRUE
794	Abnormal results of other function studies (bladder, pancreas, placenta, spleen, etc)	symptoms											TRUE
609.2	Abnormal spermatozoa	genitourinary											TRUE
516	Abnormal sputum	respiratory											TRUE
350.2	Abnormality of gait	neurological											TRUE
289.9	Abnormality of red blood cells	hematopoietic											TRUE
251.8	Abnormality of secretion of glucagon or gastrin	endocrine/metabolic											TRUE
276.4	Acid-base balance disorder	endocrine/metabolic											TRUE
175	Acquired absence of breast	neoplasms											TRUE
286.4	Acquired coagulation factor deficiency	hematopoietic											TRUE
736.2	Acquired deformities of finger	musculoskeletal											TRUE
736.1	Acquired deformities of forearm	musculoskeletal											TRUE
736.3	Acquired deformities of hip	musculoskeletal											TRUE
736.5	Acquired deformities of knee	musculoskeletal											TRUE
283	Acquired hemolytic anemias	hematopoietic											TRUE
738.4	Acquired spondylolisthesis	musculoskeletal											TRUE
735.2	Acquired toe deformities	musculoskeletal											TRUE
253.11	Acromegaly and gigantism	endocrine/metabolic											TRUE
323.2	Acute (transverse) myelitis	neurological											TRUE
474	Acute and chronic tonsillitis	respiratory											TRUE
573.4	Acute and subacute necrosis of liver	digestive											TRUE
938.1	Acute dermatitis due to solar radiation	dermatologic											TRUE
446.2	Acute febrile mucocutaneous lymph node syndrome (Kawasaki disease)	circulatory system											TRUE
580.13	Acute glomerulonephritis, NOS	genitourinary											TRUE
81.11	Acute graft-versus-host disease	infectious diseases											TRUE
710.11	Acute osteomyelitis	musculoskeletal											TRUE
420.21	Acute pericarditis	circulatory system											TRUE
523.31	Acute periodontitis	digestive											TRUE
394.4	Acute rheumatic heart disease	circulatory system											TRUE
441.1	Acute vascular insufficiency of intestine	circulatory system											TRUE
433.6	Acute, but ill-defined cerebrovascular disease	circulatory system											TRUE
255.1	Adrenal hyperfunction	endocrine/metabolic											TRUE
255.2	Adrenal hypofunction	endocrine/metabolic											TRUE
255.3	Adrenogenital disorders	endocrine/metabolic											TRUE
260.3	Adult failure to thrive	endocrine/metabolic											TRUE
960.1	Adverse effects of antibacterials (not penicillins)	injuries & poisonings											TRUE
941	Adverse reaction to serum or vaccine	injuries & poisonings											TRUE
317.11	Alcoholic liver damage	mental disorders											TRUE
276.42	Alkalosis	endocrine/metabolic											TRUE
287.2	Allergic purpura	hematopoietic											TRUE
930	Allergic reaction to food	injuries & poisonings											TRUE
960.2	Allergy/adverse effect of penicillin	injuries & poisonings											TRUE
704.11	Alopecia Areata	dermatologic											TRUE
270.34	Alpha-1-antitrypsin deficiency	endocrine/metabolic											TRUE
292.4	Altered mental status	mental disorders											TRUE
368.1	Amblyopia	sense organs											TRUE
270.33	Amyloidosis	endocrine/metabolic											TRUE
565.1	Anal and rectal polyp	digestive											TRUE
285.21	Anemia in chronic kidney disease	hematopoietic											TRUE
285.22	Anemia in neoplastic disease	hematopoietic											TRUE
285.2	Anemia of chronic disease	hematopoietic											TRUE
411.41	Aneurysm and dissection of heart	circulatory system											TRUE
442.3	Aneurysm of artery of lower extremity	circulatory system											TRUE
442.2	Aneurysm of iliac artery	circulatory system											TRUE
442.8	Aneurysm of other specified artery	circulatory system											TRUE
411.3	Angina pectoris	circulatory system											TRUE
556.11	Angiodysplasia of intestine (without mention of hemorrhage)	digestive											TRUE
368.3	Anisometropia	sense organs											TRUE
715.2	Ankylosing spondylitis	musculoskeletal											TRUE
741.1	Ankylosis of joint	musculoskeletal											TRUE
759.1	Anomalies of endocrine glands, congenital	congenital anomalies											TRUE
526.3	Anomalies of jaw size/symmetry	digestive											TRUE
379.4	Anomalies of pupillary function	sense organs											TRUE
748	Anomalies of respiratory system, congenital	congenital anomalies											TRUE
524.3	Anomalies of tooth position/malocclusion	digestive											TRUE
426.4	Anomalous atrioventricular excitation	circulatory system											TRUE
260.6	Anorexia	endocrine/metabolic											TRUE
305.21	Anorexia nervosa	mental disorders											TRUE
334.2	Anterior horn cell disease	neurological											TRUE
253.4	Anterior pituitary disorders	endocrine/metabolic											TRUE
964.1	Anticoagulants causing adverse effects	injuries & poisonings											TRUE
963.1	Antineoplastic and immunosuppressive drugs causing adverse effects	injuries & poisonings											TRUE
965.2	Antirheumatics causing adverse effects in therapeutic use	injuries & poisonings											TRUE
301.2	Antisocial/borderline personality disorder	mental disorders											TRUE
300	Anxiety disorders	mental disorders											TRUE
442.1	Aortic aneurysm	circulatory system											TRUE
447.7	Aortic ectasia	circulatory system											TRUE
394.3	Aortic valve disease	circulatory system											TRUE
379.3	Aphakia and other disorders of lens	sense organs											TRUE
292.11	Aphasia	mental disorders											TRUE
284	Aplastic anemia	hematopoietic											TRUE
513.31	Apnea	respiratory											TRUE
540	Appendiceal conditions	digestive											TRUE
540.1	Appendicitis	digestive											TRUE
442.4	Arterial dissection	circulatory system											TRUE
444	Arterial embolism and thrombosis	circulatory system											TRUE
444.1	Arterial embolism and thrombosis of lower extremity artery	circulatory system											TRUE
446.9	Arteritis NOS	circulatory system											TRUE
711	Arthropathy associated with infections	musculoskeletal											TRUE
713	Arthropathy associated with other disorders classified elsewhere	musculoskeletal											TRUE
133	Arthropod-borne diseases	infectious diseases											TRUE
742.8	Articular cartilage disorder	musculoskeletal											TRUE
414.2	ASCVD	circulatory system											TRUE
733.4	Aseptic necrosis of bone	musculoskeletal											TRUE
117.4	Aspergillosis	infectious diseases											TRUE
1013	Asphyxia and hypoxemia	NULL											TRUE
440	Atherosclerosis	circulatory system											TRUE
440.9	Atherosclerosis of aorta	circulatory system											TRUE
440.22	Atherosclerosis of native arteries of the extremities with intermittent claudication	circulatory system											TRUE
440.21	Atherosclerosis of native arteries of the extremities with ulceration or gangrene	circulatory system											TRUE
440.1	Atherosclerosis of renal artery	circulatory system											TRUE
440.2	Atherosclerosis of the extremities	circulatory system											TRUE
427.22	Atrial flutter	circulatory system											TRUE
426.2	Atrioventricular [AV] block	circulatory system											TRUE
426.24	Atrioventricular block, complete	circulatory system											TRUE
525.2	Atrophy of edentulous alveolar ridge	digestive											TRUE
624.2	Atrophy of female genital tract	genitourinary											TRUE
313.3	Autism	mental disorders											TRUE
279.2	Autoimmune disease NEC	endocrine/metabolic											TRUE
283.1	Autoimmune hemolytic anemias	hematopoietic											TRUE
609.11	Azoospermia and oligospermia	genitourinary											TRUE
480.1	Bacterial pneumonia	respiratory											TRUE
530.13	Barrett's esophagus	digestive											TRUE
711.3	Behcet's syndrome	musculoskeletal											TRUE
227.1	Benign neoplasm of adrenal gland	neoplasms											TRUE
213	Benign neoplasm of bone and articular cartilage	neoplasms											TRUE
225.1	Benign neoplasm of brain, cranial nerves, meninges	neoplasms											TRUE
224	Benign neoplasm of eye	neoplasms											TRUE
224.1	Benign neoplasm of eye, uveal	neoplasms											TRUE
223	Benign neoplasm of kidney and other urinary organs	neoplasms											TRUE
210	Benign neoplasm of lip, oral cavity, and pharynx	neoplasms											TRUE
229.1	Benign neoplasm of lymph nodes	neoplasms											TRUE
221	Benign neoplasm of other female genital organs	neoplasms											TRUE
227.2	Benign neoplasm of parathyroid gland	neoplasms											TRUE
212	Benign neoplasm of respiratory and intrathoracic organs	neoplasms											TRUE
225.2	Benign neoplasm of spinal cord, meninges	neoplasms											TRUE
226	Benign neoplasm of thyroid glands	neoplasms											TRUE
596.1	Bladder neck obstruction	genitourinary											TRUE
911	Blister	injuries & poisonings											TRUE
170.1	Bone cancer	neoplasms											TRUE
860	Bone marrow or stem cell transplant	neoplasms											TRUE
174.1	Breast cancer [female]	neoplasms											TRUE
174.2	Breast cancer [male]	neoplasms											TRUE
612	Breast conditions, congenital or relating to hormones	genitourinary											TRUE
873	Broken tooth	injuries & poisonings											TRUE
496.3	Bronchiectasis	respiratory											TRUE
480.5	Bronchopneumonia and lung abscess	respiratory											TRUE
695.2	Bullous dermatoses	dermatologic											TRUE
426.3	Bundle branch block	circulatory system											TRUE
727.2	Bursitis disorders	musculoskeletal											TRUE
260.1	Cachexia	endocrine/metabolic											TRUE
594.2	Calculus of lower urinary tract	genitourinary											TRUE
189.2	Cancer of bladder	neoplasms											TRUE
191.11	Cancer of brain	neoplasms											TRUE
191.1	Cancer of brain and nervous system	neoplasms											TRUE
165.1	Cancer of bronchus; lung	neoplasms											TRUE
170.2	Cancer of connective tissue	neoplasms											TRUE
190	Cancer of eye	neoplasms											TRUE
164	Cancer of intrathoracic organs	neoplasms											TRUE
149.4	Cancer of larynx	neoplasms											TRUE
145.3	Cancer of major salivary glands	neoplasms											TRUE
145	Cancer of mouth	neoplasms											TRUE
149.2	Cancer of nasopharynx	neoplasms											TRUE
149.9	Cancer of of nasal cavities	neoplasms											TRUE
194	Cancer of other endocrine glands	neoplasms											TRUE
184	Cancer of other female genital organs	neoplasms											TRUE
184.2	Cancer of other female genital organs (excluding uterus and ovary)	neoplasms											TRUE
202	Cancer of other lymphoid, histiocytic tissue	neoplasms											TRUE
151	Cancer of stomach	neoplasms											TRUE
145.4	Cancer of the gums	neoplasms											TRUE
145.2	Cancer of tongue	neoplasms											TRUE
165	Cancer within the respiratory system	neoplasms											TRUE
195	Cancer, suspected or other	neoplasms											TRUE
112.3	Candidiasis of skin and nails	infectious diseases											TRUE
259.2	Carcinoid syndrome	endocrine/metabolic											TRUE
172.3	Carcinoma in situ of skin	neoplasms											TRUE
427.42	Cardiac arrest	circulatory system											TRUE
429.9	Cardiac complications, not elsewhere classified	circulatory system											TRUE
426	Cardiac conduction disorders	circulatory system											TRUE
426.91	Cardiac pacemaker in situ	circulatory system											TRUE
797.1	Cardiogenic shock	symptoms											TRUE
277.8	Carnitine deficiencies	endocrine/metabolic											TRUE
347	Cataplexy and narcolepsy	neurological											TRUE
681.6	Cellulitis and abscess of foot, toe	dermatologic											TRUE
528.3	Cellulitis and abscess of oral soft tissues	digestive											TRUE
386.21	Central origin vertigo	sense organs											TRUE
327.31	Central/nonobstroctive sleep apnea	neurological											TRUE
433.5	Cerebral aneurysm	circulatory system											TRUE
433.12	Cerebral atherosclerosis	circulatory system											TRUE
348.4	Cerebral cysts	neurological											TRUE
331.9	Cerebral degeneration, unspecified	neurological											TRUE
433.3	Cerebral ischemia	circulatory system											TRUE
816	Cerebral laceration and contusion	injuries & poisonings											TRUE
433	Cerebrovascular disease	circulatory system											TRUE
958	Certain early complications of trauma or procedure	injuries & poisonings											TRUE
180.1	Cervical cancer	neoplasms											TRUE
767	Cervicocranial/Cervicobrachial syndrome	symptoms											TRUE
197	Chemotherapy	neoplasms											TRUE
575.1	Cholangitis	digestive											TRUE
385.3	Cholesteatoma	sense organs											TRUE
733.9	Chondromalacia	musculoskeletal											TRUE
363	Chorioretinal inflammations, scars, and other disorders of choroid	sense organs											TRUE
363.3	Chorioretinal scars	sense organs											TRUE
758	Chromosomal anomalies and genetic disorders	congenital anomalies											TRUE
496	Chronic airway obstruction	respiratory											TRUE
496.2	Chronic bronchitis	respiratory											TRUE
592.12	Chronic cystitis	genitourinary											TRUE
938.2	Chronic dermatitis due to solar radiation	dermatologic											TRUE
580.14	Chronic glomerulonephritis, NOS	genitourinary											TRUE
81.12	Chronic graft-versus-host disease	infectious diseases											TRUE
70.4	Chronic hepatitis	infectious diseases											TRUE
371.9	Chronic inflammatory disorders of orbit	sense organs											TRUE
592.13	Chronic interstitial cystitis	genitourinary											TRUE
585.4	Chronic kidney disease, Stage I or II	genitourinary											TRUE
585.33	Chronic Kidney Disease, Stage III	genitourinary											TRUE
585.34	Chronic Kidney Disease, Stage IV	genitourinary											TRUE
473.1	Chronic laryngitis	respiratory											TRUE
495.1	Chronic obstructive asthma	respiratory											TRUE
710.12	Chronic osteomyelitis	musculoskeletal											TRUE
355.1	Chronic pain syndrome	neurological											TRUE
577.2	Chronic pancreatitis	digestive											TRUE
573.1	Chronic passive congestion of liver	digestive											TRUE
420.22	Chronic pericarditis	circulatory system											TRUE
523.32	Chronic periodontitis	digestive											TRUE
415.2	Chronic pulmonary heart disease	circulatory system											TRUE
245.2	Chronic thyroiditis	endocrine/metabolic											TRUE
707.2	Chronic ulcer of leg or foot	dermatologic											TRUE
707.3	Chronic ulcer of unspecified site	dermatologic											TRUE
441.2	Chronic vascular insufficiency of intestine	circulatory system											TRUE
456	Chronic venous insufficiency [CVI]	circulatory system											TRUE
327.6	Circadian rhythm sleep disorder	neurological											TRUE
571.51	Cirrhosis of liver without mention of alcohol	digestive											TRUE
735.22	Claw toe (acquired)	musculoskeletal											TRUE
749.1	Cleft palate	congenital anomalies											TRUE
117.2	Coccidioidomycosis	infectious diseases											TRUE
803.21	Colles' fracture	injuries & poisonings											TRUE
153.2	Colon cancer	neoplasms											TRUE
368.5	Color vision deficiencies	sense organs											TRUE
348.7	Coma	neurological											TRUE
355	Complex regional/central pain syndrome	neurological											TRUE
859	Complication due to other implant and internal device	injuries & poisonings											TRUE
874	Complication of amputation stump	injuries & poisonings											TRUE
853	Complication of colostomy or enterostomy	injuries & poisonings											TRUE
858	Complication of internal orthopedic device	injuries & poisonings											TRUE
855	Complication of nervous system device, implant, and graft	injuries & poisonings											TRUE
854	Complications of cardiac/vascular device, implant, and graft	injuries & poisonings											TRUE
536.7	Complications of gastrostomy, colostomy and enterostomy	digestive											TRUE
679	Complications of in utero procedures	pregnancy complications											TRUE
668	Complications of the administration of anesthetic or other sedation in labor and delivery	pregnancy complications											TRUE
656.7	Conditions involving the integument and temperature regulation of fetus and newborn	pregnancy complications											TRUE
312	Conduct disorders	mental disorders											TRUE
389.2	Conductive hearing loss	sense organs											TRUE
756.1	Congenital anomalies of abdominal wall; diaphram	congenital anomalies											TRUE
612.3	Congenital anomalies of breast	genitourinary											TRUE
749	Congenital anomalies of face and neck	congenital anomalies											TRUE
751.1	Congenital anomalies of genital organs	congenital anomalies											TRUE
750.21	Congenital anomalies of intestine	congenital anomalies											TRUE
755	Congenital anomalies of limbs	congenital anomalies											TRUE
751.12	Congenital anomalies of male genital organs	congenital anomalies											TRUE
750.13	Congenital anomalies of mouth/tongue	congenital anomalies											TRUE
756.3	Congenital anomalies of muscle, tendon, fascia, and connective tissue	congenital anomalies											TRUE
747.2	Congenital anomalies of peripheral vascular system	congenital anomalies											TRUE
753.2	Congenital anomalies of posterior segment of eye	congenital anomalies											TRUE
749.2	Congenital anomalies of skull and face bones	congenital anomalies											TRUE
750.15	Congenital anomalies of stomach	congenital anomalies											TRUE
753	Congenital anomalies of the eye	congenital anomalies											TRUE
757	Congenital anomalies of the integument	congenital anomalies											TRUE
755.4	Congenital anomalies of upper limb, including shoulder girdle	congenital anomalies											TRUE
751.2	Congenital anomalies of urinary system	congenital anomalies											TRUE
755.3	Congenital anomaly of fingers/toes	congenital anomalies											TRUE
750.22	Congenital anomaly of gallbladder, bile ducts, liver, pancreas	congenital anomalies											TRUE
753.1	Congenital cataract and lens anomalies	congenital anomalies											TRUE
286.1	Congenital coagulation defects	hematopoietic											TRUE
755.1	Congenital deformities of feet	congenital anomalies											TRUE
286.13	Congenital factor VIII disorder	hematopoietic											TRUE
755.61	Congenital hip dysplasia and deformity	congenital anomalies											TRUE
244.5	Congenital hypothyroidism	endocrine/metabolic											TRUE
754	Congenital musculoskeletal deformities of spine	congenital anomalies											TRUE
691.3	Congenital pigmentary anomalies of skin	dermatologic											TRUE
371.2	Conjunctivitis, noninfectious	sense organs											TRUE
284.2	Constitutional aplastic anemia	hematopoietic											TRUE
939.1	Contact and allergic dermatitis of eyelid	dermatologic											TRUE
931	Contact dermatitis and other eczema due to plants [except food]	dermatologic											TRUE
739	Contracture of joint	musculoskeletal											TRUE
728.71	Contracture of palmar fascia [Dupuytren's disease]	musculoskeletal											TRUE
727.7	Contracture of tendon (sheath)	musculoskeletal											TRUE
364.9	Cornea replaced by transplant	sense organs											TRUE
364.4	Corneal degenerations	sense organs											TRUE
364.5	Corneal dystrophy	sense organs											TRUE
364.2	Corneal edema	sense organs											TRUE
364.1	Corneal opacity	sense organs											TRUE
364	Corneal opacity and other disorders of cornea	sense organs											TRUE
370.1	Corneal ulcer	sense organs											TRUE
733.6	Costochondritis	musculoskeletal											TRUE
771.2	Cramp of limb	symptoms											TRUE
1006	Crushing injury	NULL											TRUE
737	Curvature of spine	musculoskeletal											TRUE
255.11	Cushing's syndrome	endocrine/metabolic											TRUE
695.41	Cutaneous lupus erythematosus	dermatologic											TRUE
577.3	Cyst and pseudocyst of pancreas	digestive											TRUE
733.2	Cyst of bone	musculoskeletal											TRUE
528.41	Cyst of the salivary gland	digestive											TRUE
499	Cystic fibrosis	respiratory											TRUE
362.23	Cystoid macular degeneration of retina	sense organs											TRUE
528.4	Cysts of oral soft tissues	digestive											TRUE
526.1	Cysts of the jaws	digestive											TRUE
799	Debility unspecified	symptoms											TRUE
707.1	Decubitus ulcer	dermatologic											TRUE
286.6	Defibrination syndrome	hematopoietic											TRUE
281.9	Deficiency anemias	hematopoietic											TRUE
279.11	Deficiency of humoral immunity	endocrine/metabolic											TRUE
389.3	Degenerative and vascular disorders of ear	sense organs											TRUE
334	Degenerative disease of the spinal cord	neurological											TRUE
702	Degenerative skin conditions and other dermatoses	dermatologic											TRUE
702.4	Degenerative skin disorders	dermatologic											TRUE
290	Delirium dementia and amnestic and other cognitive disorders	mental disorders											TRUE
290.2	Delirium due to conditions classified elsewhere	mental disorders											TRUE
290.1	Dementias	mental disorders											TRUE
521.2	Dental abrasion, erosion and attrition	digestive											TRUE
521.1	Dental caries	digestive											TRUE
524	Dentofacial anomalies, including malocclusion	digestive											TRUE
509.8	Dependence on respirator [Ventilator] or supplemental oxygen	respiratory											TRUE
742	Derangement of joint, non-traumatic	musculoskeletal											TRUE
938	Dermatitis due to solar radiation	dermatologic											TRUE
695.21	Dermatitis herpetiformis	dermatologic											TRUE
374.6	Dermatochalasis	sense organs											TRUE
709.5	Dermatomyositis	dermatologic											TRUE
315	Develomental delays and disorders	mental disorders											TRUE
253.3	Diabetes insipidus	endocrine/metabolic											TRUE
250	Diabetes mellitus	endocrine/metabolic											TRUE
250.15	Diabetes type 1 with peripheral circulatory disorders	endocrine/metabolic											TRUE
250.25	Diabetes type 2 with peripheral circulatory disorders	endocrine/metabolic											TRUE
250.7	Diabetic retinopathy	endocrine/metabolic											TRUE
741.3	Difficulty in walking	musculoskeletal											TRUE
368.2	Diplopia and disorders of binocular vision	sense organs											TRUE
448	Disease of capillaries	circulatory system											TRUE
394.7	Disease of tricuspid valve	circulatory system											TRUE
529	Diseases and other conditions of the tongue	digestive											TRUE
31	Diseases due to other mycobacteria	infectious diseases											TRUE
530	Diseases of esophagus	digestive											TRUE
521	Diseases of hard tissues of teeth	digestive											TRUE
577	Diseases of pancreas	digestive											TRUE
522	Diseases of pulp and periapical tissues	digestive											TRUE
706	Diseases of sebaceous glands	dermatologic											TRUE
289.5	Diseases of spleen	hematopoietic											TRUE
527	Diseases of the salivary glands	digestive											TRUE
254	Diseases of thymus gland	endocrine/metabolic											TRUE
279	Disorders involving the immune mechanism	endocrine/metabolic											TRUE
368.7	Disorders of accommodation	sense organs											TRUE
389.5	Disorders of acoustic nerve	sense organs											TRUE
270.2	Disorders of amino-acid metabolism	endocrine/metabolic											TRUE
275.5	Disorders of calcium/phosphorus metabolism	endocrine/metabolic											TRUE
275.2	Disorders of copper metabolism	endocrine/metabolic											TRUE
513.8	Disorders of diaphragm	respiratory											TRUE
530.5	Disorders of esophageal motility	digestive											TRUE
380	Disorders of external ear	sense organs											TRUE
379.5	Disorders of iris and ciliary body	sense organs											TRUE
375	Disorders of lacrimal system	sense organs											TRUE
275	Disorders of mineral metabolism	endocrine/metabolic											TRUE
352	Disorders of other cranial nerves	neurological											TRUE
252	Disorders of parathyroid gland	endocrine/metabolic											TRUE
604	Disorders of penis	genitourinary											TRUE
367	Disorders of refraction and accommodation; blindness and low vision	sense organs											TRUE
724.1	Disorders of sacrum	musculoskeletal											TRUE
705	Disorders of sweat glands	dermatologic											TRUE
337	Disorders of the autonomic nervous system	neurological											TRUE
360	Disorders of the globe	sense organs											TRUE
376	Disorders of the orbit	sense organs											TRUE
270.21	Disorders of urea cycle metabolism	endocrine/metabolic											TRUE
588	Disorders resulting from impaired renal function	genitourinary											TRUE
303.1	Dissociative disorder	mental disorders											TRUE
527.7	Disturbance of salivary secretion	digestive											TRUE
520.2	Disturbances in tooth eruption	digestive											TRUE
270.1	Disturbances of amino-acid transport	endocrine/metabolic											TRUE
562.2	Diverticulitis	digestive											TRUE
362.27	Drusen (degenerative) of retina	sense organs											TRUE
531.3	Duodenal ulcer	digestive											TRUE
535.6	Duodenitis	digestive											TRUE
620	Dysplasia of female genital organs	genitourinary											TRUE
624.1	Dystrophy of female genital tract	genitourinary											TRUE
634.3	Ectopic pregnancy	pregnancy complications											TRUE
374.1	Ectropion or entropion	sense organs											TRUE
1014	Effects of heat, cold and air pressure	NULL											TRUE
990	Effects radiation NOS	injuries & poisonings											TRUE
276.1	Electrolyte imbalance	endocrine/metabolic											TRUE
790.8	Elevated C-reactive protein (CRP)	symptoms											TRUE
795.82	Elevated cancer antigen 125 [CA 125]	symptoms											TRUE
790.1	Elevated sedimentation rate	symptoms											TRUE
496.1	Emphysema	respiratory											TRUE
506	Empyema and pneumothorax	respiratory											TRUE
323	Encephalitis	neurological											TRUE
323.8	Encephalitis, non-infectious	neurological											TRUE
348.8	Encephalopathy, not elsewhere classified	neurological											TRUE
585.32	End stage renal disease	genitourinary											TRUE
420.3	Endocarditis	circulatory system											TRUE
656.3	Endocrine and metabolic disturbances of fetus and newborn	pregnancy complications											TRUE
621	Endometrial hyperplasia	genitourinary											TRUE
288.3	Eosinophilia	hematopoietic											TRUE
530.15	Eosinophilic esophagitis	digestive											TRUE
345.1	Epilepsy	neurological											TRUE
375.2	Epiphora	sense organs											TRUE
605	Erectile dysfunction [ED]	genitourinary											TRUE
695.81	Erythema nodosum	dermatologic											TRUE
690	Erythematosquamous dermatosis	dermatologic											TRUE
750.11	Esophageal atresia/tracheoesophageal fistula	congenital anomalies											TRUE
530.2	Esophageal bleeding (varices/hemorrhage)	digestive											TRUE
530.1	Esophagitis, GERD and related diseases	digestive											TRUE
333.1	Essential tremor	neurological											TRUE
242.3	Exophthalmos	endocrine/metabolic											TRUE
526.8	Exostosis of jaw	digestive											TRUE
333	Extrapyramidal disease and abnormal movement disorders	neurological											TRUE
500.1	Extrinsic allergic alveolitis	respiratory											TRUE
352.2	Facial nerve disorders [CN7]	neurological											TRUE
772.6	Facial weakness	symptoms											TRUE
264.2	Failure to thrive (childhood)	endocrine/metabolic											TRUE
550.3	Femoral hernia	digestive											TRUE
610.2	Fibroadenosis of breast	genitourinary											TRUE
610.3	Fibrosclerosis of breast	genitourinary											TRUE
426.21	First degree AV block	circulatory system											TRUE
276.6	Fluid overload	endocrine/metabolic											TRUE
803.3	Fracture of clavicle or scapula	injuries & poisonings											TRUE
803.1	Fracture of humerus	injuries & poisonings											TRUE
800	Fracture of lower limb	injuries & poisonings											TRUE
800.1	Fracture of neck of femur	injuries & poisonings											TRUE
800.4	Fracture of patella	injuries & poisonings											TRUE
802	Fracture of pelvis	injuries & poisonings											TRUE
807	Fracture of ribs	injuries & poisonings											TRUE
800.3	Fracture of tibia and fibula	injuries & poisonings											TRUE
809	Fracture of unspecified bones	injuries & poisonings											TRUE
800.2	Fracture of unspecified part of femur	injuries & poisonings											TRUE
803	Fracture of upper limb	injuries & poisonings											TRUE
805	Fracture of vertebral column without mention of spinal cord injury	injuries & poisonings											TRUE
564	Functional digestive disorders	digestive											TRUE
791	Gangrene	symptoms											TRUE
531.2	Gastric ulcer	digestive											TRUE
530.7	Gastroesophageal laceration-hemorrhage syndrome	digestive											TRUE
569.2	Gastrointestinal complications	digestive											TRUE
303.31	Gastrointestinal malfunction arising from mental factors	mental disorders											TRUE
531.5	Gastrojejunal ulcer	digestive											TRUE
536.3	Gastroparesis	digestive											TRUE
345.11	Generalized convulsive epilepsy	neurological											TRUE
736.4	Genu valgum or varum (acquired)	musculoskeletal											TRUE
446.5	Giant cell arteritis	circulatory system											TRUE
523	Gingival and periodontal diseases	digestive											TRUE
523.1	Gingivitis	digestive											TRUE
529.1	Glossitis	digestive											TRUE
529.6	Glossodynia	digestive											TRUE
255.21	Glucocorticoid deficiency	endocrine/metabolic											TRUE
90.2	Gonococcal infections	infectious diseases											TRUE
274.1	Gout	endocrine/metabolic											TRUE
274.11	Gouty arthropathy	endocrine/metabolic											TRUE
81.1	Graft-versus-host disease	infectious diseases											TRUE
38.1	Gram negative septicemia	infectious diseases											TRUE
38.2	Gram positive septicemia	infectious diseases											TRUE
292.6	Hallucinations	mental disorders											TRUE
735.23	Hallux rigidus	musculoskeletal											TRUE
735.21	Hammer toe (acquired)	musculoskeletal											TRUE
428.2	Heart failure NOS	circulatory system											TRUE
428.4	Heart failure with preserved EF [Diastolic heart failure]	circulatory system											TRUE
428.3	Heart failure with reduced EF [Systolic or combined heart failure]	circulatory system											TRUE
429.1	Heart transplant/surgery	circulatory system											TRUE
395	Heart valve disorders	circulatory system											TRUE
395.6	Heart valve replaced	circulatory system											TRUE
134	Helminthiases	infectious diseases											TRUE
741.5	Hemarthrosis	musculoskeletal											TRUE
656.5	Hematological disorders of newborn	pregnancy complications											TRUE
342	Hemiplegia	neurological											TRUE
285.8	Hemoglobinuria	hematopoietic											TRUE
283.21	Hemolytic-uremic syndrome	hematopoietic											TRUE
516.1	Hemoptysis	respiratory											TRUE
635	Hemorrhage during pregnancy; childbirth and postpartum	pregnancy complications											TRUE
531.1	Hemorrhage from gastrointestinal ulcer	digestive											TRUE
656.4	Hemorrhage of fetus or newborn	pregnancy complications											TRUE
578.9	Hemorrhage of gastrointestinal tract	digestive											TRUE
286.5	Hemorrhagic disorder due to intrinsic circulating anticoagulants	hematopoietic											TRUE
70.9	Hepatitis NOS	infectious diseases											TRUE
356	Hereditary and idiopathic peripheral neuropathy	neurological											TRUE
520.1	Hereditary disturbances in tooth structure	digestive											TRUE
275.11	Hereditary hemochromatosis	hematopoietic											TRUE
362.7	Hereditary retinal dystrophies	sense organs											TRUE
53.1	Herpes zoster with nervous system complications	infectious diseases											TRUE
71.1	HIV infection, symptomatic	infectious diseases											TRUE
201	Hodgkin's disease	neoplasms											TRUE
962.3	Hormones and synthetic substitutes causing adverse effects in therapeutic use	injuries & poisonings											TRUE
71	Human immunodeficiency virus [HIV] disease	infectious diseases											TRUE
603.1	Hydrocele	genitourinary											TRUE
331.1	Hydrocephalus	neurological											TRUE
255.12	Hyperaldosteronism	endocrine/metabolic											TRUE
275.6	Hypercalcemia	endocrine/metabolic											TRUE
286.8	Hypercoagulable state	hematopoietic											TRUE
256.1	Hyperestrogenism	endocrine/metabolic											TRUE
276.11	Hyperosmolality and/or hypernatremia	endocrine/metabolic											TRUE
252.1	Hyperparathyroidism	endocrine/metabolic											TRUE
276.13	Hyperpotassemia	endocrine/metabolic											TRUE
446.3	Hypersensitivity angiitis	circulatory system											TRUE
401	Hypertension	circulatory system											TRUE
401.22	Hypertensive chronic kidney disease	circulatory system											TRUE
401.2	Hypertensive heart and/or renal disease	circulatory system											TRUE
401.21	Hypertensive heart disease	circulatory system											TRUE
425.11	Hypertrophic obstructive cardiomyopathy	circulatory system											TRUE
612.2	Hypertrophy of breast (Gynecomastia)	genitourinary											TRUE
527.1	Hypertrophy of salivary gland	digestive											TRUE
513.4	Hyperventilation	respiratory											TRUE
252.2	Hypoparathyroidism	endocrine/metabolic											TRUE
458	Hypotension	circulatory system											TRUE
360.3	Hypotony of eye	sense organs											TRUE
513.3	Hypoventilation	respiratory											TRUE
258	Iatrogenic endocrine disorders	endocrine/metabolic											TRUE
458.2	Iatrogenic hypotension	circulatory system											TRUE
452.1	Iatrogenic pulmonary embolism and infarction	circulatory system											TRUE
691.1	Ichthyosis congenita	dermatologic											TRUE
504.1	Idiopathic fibrosing alveolitis	respiratory											TRUE
559	Ileostomy status	digestive											TRUE
560.2	Impaction of intestine	digestive											TRUE
312.3	Impulse control disorder	mental disorders											TRUE
550.6	Incisional hernia	digestive											TRUE
343	Infantile cerebral palsy	neurological											TRUE
369	Infection of the eye	sense organs											TRUE
41.9	Infection with drug-resistant microorganisms	infectious diseases											TRUE
81	Infection/inflammation of internal prosthetic device; implant; and graft	infectious diseases											TRUE
657	Infections specific to the perinatal period	pregnancy complications											TRUE
79.2	Infectious mononucleosis	infectious diseases											TRUE
712	Infective connective tissue disorders	musculoskeletal											TRUE
132	Infestation (lice, mites)	infectious diseases											TRUE
371	Inflammation of the eye	sense organs											TRUE
526.5	Inflammatory conditions of jaw	digestive											TRUE
614.5	Inflammatory disease of cervix, vagina, and vulva	genitourinary											TRUE
614	Inflammatory diseases of female pelvic organs	genitourinary											TRUE
942	Infusion and transfusion reaction	injuries & poisonings											TRUE
550.1	Inguinal hernia	digestive											TRUE
907	Injuries to the nervous system	injuries & poisonings											TRUE
1007	Injury to blood vessels	NULL											TRUE
957	Injury to other and unspecified nerves	injuries & poisonings											TRUE
962.2	Insulins and antidiabetic agents causing adverse effects in therapeutic use	injuries & poisonings											TRUE
656.22	Interstitial emphysema and related conditions of newborn	pregnancy complications											TRUE
722.7	Intervertebral disc disorder with myelopathy	musculoskeletal											TRUE
8.51	Intestinal e.coli	infectious diseases											TRUE
134.1	Intestinal helminthiases	infectious diseases											TRUE
8.52	Intestinal infection due to C. difficile	infectious diseases											TRUE
8.7	Intestinal infection due to protozoa	infectious diseases											TRUE
430.2	Intracerebral hemorrhage	circulatory system											TRUE
430	Intracranial hemorrhage	circulatory system											TRUE
818	Intracranial hemorrhage (injury)	injuries & poisonings											TRUE
656.1	Isoimmunization of fetus or newborn	pregnancy complications											TRUE
526.9	Jaw disease NOS	digestive											TRUE
732.1	Juvenile osteochondrosis	musculoskeletal											TRUE
714.2	Juvenile rheumatoid arthritis	musculoskeletal											TRUE
370	Keratitis	sense organs											TRUE
370.3	Keratoconjunctivitis	sense organs											TRUE
370.31	Keratoconjunctivitis sicca	sense organs											TRUE
364.41	Keratoconus	sense organs											TRUE
701.1	Keratoderma, acquired	dermatologic											TRUE
587	Kidney replaced by transpant	genitourinary											TRUE
260.21	Kwashiorkor	endocrine/metabolic											TRUE
737.1	Kyphosis (acquired)	musculoskeletal											TRUE
386.3	Labyrinthitis	sense organs											TRUE
350.3	Lack of coordination	neurological											TRUE
264.9	Lack of normal physiological development, unspecified	endocrine/metabolic											TRUE
374.2	Lagophthalmos	sense organs											TRUE
202.24	Large cell lymphoma	neoplasms											TRUE
433.8	Late effects of cerebrovascular disease	circulatory system											TRUE
728.2	Laxity of ligament or hypermobility syndrome	musculoskeletal											TRUE
315.1	Learning disorder	mental disorders											TRUE
426.32	Left bundle branch block	circulatory system											TRUE
537.1	Lesions of stomach and duodenum	digestive											TRUE
204	Leukemia	neoplasms											TRUE
528.6	Leukoplakia of oral mucosa	digestive											TRUE
571.8	Liver abscess and sequelae of chronic liver disease	digestive											TRUE
573.2	Liver replaced by transplant	digestive											TRUE
278.3	Localized adiposity	endocrine/metabolic											TRUE
742.1	Loose body in joint	musculoskeletal											TRUE
737.2	Lordosis (acquired)	musculoskeletal											TRUE
525.1	Loss of teeth or edentulism	digestive											TRUE
754.1	Lumbosacral spondylolysis, congenital	congenital anomalies											TRUE
500	Lung disease due to external agents	respiratory											TRUE
510.2	Lung transplant	respiratory											TRUE
130.1	Lyme disease	infectious diseases											TRUE
204.1	Lymphoid leukemia	neoplasms											TRUE
204.11	Lymphoid leukemia, acute	neoplasms											TRUE
204.12	Lymphoid leukemia, chronic	neoplasms											TRUE
362.29	Macular degeneration (senile) of retina NOS	sense organs											TRUE
362.26	Macular puckering of retina	sense organs											TRUE
189.21	Malignant neoplasm of bladder	neoplasms											TRUE
195.3	Malignant neoplasm of head, face, and neck	neoplasms											TRUE
189.11	Malignant neoplasm of kidney, except pelvis	neoplasms											TRUE
155.1	Malignant neoplasm of liver, primary	neoplasms											TRUE
184.11	Malignant neoplasm of ovary	neoplasms											TRUE
184.1	Malignant neoplasm of ovary and other uterine adnexa	neoplasms											TRUE
153.3	Malignant neoplasm of rectum, rectosigmoid junction, and anus	neoplasms											TRUE
159.4	Malignant neoplasm of retroperitoneum and peritoneum	neoplasms											TRUE
159.2	Malignant neoplasm of small intestine, including duodenum	neoplasms											TRUE
182	Malignant neoplasm of uterus	neoplasms											TRUE
195.1	Malignant neoplasm, other	neoplasms											TRUE
733.8	Malunion and nonunion of fracture	musculoskeletal											TRUE
611.11	Mammographic microcalcification	genitourinary											TRUE
191	Manlignant and unknown neoplasms of brain and nervous system	neoplasms											TRUE
381.3	Mastoiditis & related conditions	sense organs											TRUE
255.13	Medulloadrenal hyperfunction	endocrine/metabolic											TRUE
281.1	Megaloblastic anemia	hematopoietic											TRUE
172.11	Melanomas of skin	neoplasms											TRUE
386.1	Meniere's disease	sense organs											TRUE
320	Meningitis	neurological											TRUE
627	Menopausal and postmenopausal disorders	genitourinary											TRUE
315.3	Mental retardation	mental disorders											TRUE
41.12	Methicillin resistant Staphylococcus aureus	infectious diseases											TRUE
41.11	Methicillin sensitive Staphylococcus aureus	infectious diseases											TRUE
292.2	Mild cognitive impairment	mental disorders											TRUE
634.1	Missed abortion/Hydatidiform mole	pregnancy complications											TRUE
394.2	Mitral valve disease	circulatory system											TRUE
394.1	Mitral valve stenosis and aortic valve stenosis	circulatory system											TRUE
426.22	Mobitz II AV block	circulatory system											TRUE
433.32	Moyamoya disease	circulatory system											TRUE
480.13	MRSA pneumonia	respiratory											TRUE
204.4	Multiple myeloma	neoplasms											TRUE
840.1	Muscle/tendon sprain	injuries & poisonings											TRUE
728.1	Muscular calcification and ossification	musculoskeletal											TRUE
359.1	Muscular dystrophies	neurological											TRUE
772.1	Muscular wasting and disuse atrophy	symptoms											TRUE
358.1	Myasthenia gravis	neurological											TRUE
289.1	Myelofibrosis	hematopoietic											TRUE
204.2	Myeloid leukemia	neoplasms											TRUE
204.21	Myeloid leukemia, acute	neoplasms											TRUE
204.22	Myeloid leukemia, chronic	neoplasms											TRUE
411.2	Myocardial infarction	circulatory system											TRUE
420.1	Myocarditis	circulatory system											TRUE
333.2	Myoclonus	neurological											TRUE
358	Myoneural disorders	neurological											TRUE
359.2	Myopathy	neurological											TRUE
384.1	Myringitis	sense organs											TRUE
656.9	Neonatal bradycardia or tachycardia	pregnancy complications											TRUE
174.3	Neoplasm of uncertain behavior of breast	neoplasms											TRUE
158	Neoplasm of unspecified nature of digestive system	neoplasms											TRUE
580.31	Nephritis and nephropathy in diseases classified elsewhere	genitourinary											TRUE
580.32	Nephritis and nephropathy with pathological lesion	genitourinary											TRUE
580.3	Nephritis and nephropathy without mention of glomerulonephritis	genitourinary											TRUE
580.2	Nephrotic syndrome without mention of glomerulonephritis	genitourinary											TRUE
353.1	Nerve plexus lesions	neurological											TRUE
353	Nerve root and plexus disorders	neurological											TRUE
353.2	Nerve root lesions	neurological											TRUE
752	Nervous system congenital anomalies	congenital anomalies											TRUE
752.1	Neural tube defects	congenital anomalies											TRUE
209	Neuroendocrine tumors	neoplasms											TRUE
199.4	Neurofibromatosis	neoplasms											TRUE
292	Neurological disorders	mental disorders											TRUE
202.21	Nodular lymphoma	neoplasms											TRUE
283.2	Non-autoimmune hemolytic anemias	hematopoietic											TRUE
875	Non-healing surgical wound	injuries & poisonings											TRUE
202.2	Non-Hodgkins lymphoma	neoplasms											TRUE
580.12	Non-proliferative glomerulonephritis	genitourinary											TRUE
371.33	Noninfectious dermatoses of eyelid	sense organs											TRUE
450	Noninfectious disorders of lymphatic channels	circulatory system											TRUE
395.2	Nonrheumatic aortic valve disorders	circulatory system											TRUE
395.4	Nonrheumatic pulmonary valve disorders	circulatory system											TRUE
395.3	Nonrheumatic tricuspid valve disorders	circulatory system											TRUE
366.1	Nonsenile Cataract	sense organs											TRUE
346.3	Nonspecific abnormal findings in cerebrospinal fluid	neurological											TRUE
575.9	Nonspecific abnormal findings on radiological and other examination of biliary tract	digestive											TRUE
346.1	Nonspecific abnormal findings on radiological and other examination of skull and head	neurological											TRUE
346.2	Nonspecific abnormal results of function study of brain and central nervous system	neurological											TRUE
259.1	Nonspecific abnormal results of other endocrine function study	endocrine/metabolic											TRUE
729.7	Nontraumatic compartment syndrome	musculoskeletal											TRUE
260.22	Nutritional marasmus	endocrine/metabolic											TRUE
378.2	Nystagmus and other irregular eye movements	sense organs											TRUE
496.21	Obstructive chronic bronchitis	respiratory											TRUE
751.3	Obstructive genitourinary defect	congenital anomalies											TRUE
433.1	Occlusion and stenosis of precerebral arteries	circulatory system											TRUE
433.2	Occlusion of cerebral arteries	circulatory system											TRUE
433.11	Occlusion of cerebral arteries, with cerebral infarction	circulatory system											TRUE
599.6	Oliguria and anuria	genitourinary											TRUE
870.2	Open wound of ear	injuries & poisonings											TRUE
871.3	Open wound of foot except toe(s) alone	injuries & poisonings											TRUE
870.8	Open wound of genital organs	injuries & poisonings											TRUE
871.1	Open wound of hand except finger(s)	injuries & poisonings											TRUE
870.5	Open wound of lip and mouth	injuries & poisonings											TRUE
870.6	Open wound of neck	injuries & poisonings											TRUE
870.4	Open wound of nose and sinus	injuries & poisonings											TRUE
871.4	Open wound of toe(s)	injuries & poisonings											TRUE
870.1	Open wound or laceration of eye or eyelid	injuries & poisonings											TRUE
365.1	Open-angle glaucoma	sense organs											TRUE
965.1	Opiates and related narcotics causing adverse effects in therapeutic use	injuries & poisonings											TRUE
377.1	Optic atrophy	sense organs											TRUE
377.3	Optic neuritis/neuropathy	sense organs											TRUE
601.3	Orchitis and epididymitis	genitourinary											TRUE
513.32	Orthopnea	respiratory											TRUE
731	Osteitis deformans and osteopathies associated with other disorders classified elsewhere	musculoskeletal											TRUE
740.1	Osteoarthritis; localized	musculoskeletal											TRUE
740.3	Osteoarthrosis involving more than one site, but not specified as generalized	musculoskeletal											TRUE
740.2	Osteoarthrosis, generalized	musculoskeletal											TRUE
740.12	Osteoarthrosis, localized, secondary	musculoskeletal											TRUE
732.7	Osteochondritis dissecans	musculoskeletal											TRUE
732	Osteochondropathies	musculoskeletal											TRUE
710	Osteomyelitis, periostitis, and other infections involving bone	musculoskeletal											TRUE
743.11	Osteoporosis NOS	musculoskeletal											TRUE
736	Other acquired deformities of limbs	musculoskeletal											TRUE
411.9	Other acute and subacute forms of ischemic heart disease	circulatory system											TRUE
721.8	Other allied disorders of spine	musculoskeletal											TRUE
504	Other alveolar and parietoalveolar pneumonopathy	respiratory											TRUE
722.9	Other and unspecified disc disorder	musculoskeletal											TRUE
349	Other and unspecified disorders of the nervous system	neurological											TRUE
442	Other aneurysm	circulatory system											TRUE
716	Other arthropathies	musculoskeletal											TRUE
218.2	Other benign neoplasm of uterus	neoplasms											TRUE
426.8	Other cardiac conduction disorders	circulatory system											TRUE
425.8	Other cardiomyopathy	circulatory system											TRUE
598.4	Other cells and casts in urine	genitourinary											TRUE
331	Other cerebral degenerations	neurological											TRUE
411.8	Other chronic ischemic heart disease, unspecified	circulatory system											TRUE
324	Other CNS infection and poliomyelitis	neurological											TRUE
348	Other conditions of brain	neurological											TRUE
755.6	Other congenital anomalies of lower limb, including pelvic girdle	congenital anomalies											TRUE
756	Other congenital musculoskeletal anomalies	congenital anomalies											TRUE
277.6	Other deficiencies of circulating enzymes	endocrine/metabolic											TRUE
281	Other deficiency anemia	hematopoietic											TRUE
333.8	Other degenerative diseases of the basal ganglia	neurological											TRUE
341	Other demyelinating diseases of central nervous system	neurological											TRUE
519	Other diseases of respiratory system, not elsewhere classified	respiratory											TRUE
447	Other disorders of arteries and arterioles	circulatory system											TRUE
596	Other disorders of bladder	genitourinary											TRUE
271.9	Other disorders of carbohydrate transport and metabolism	endocrine/metabolic											TRUE
459	Other disorders of circulatory system	circulatory system											TRUE
277.5	Other disorders of lipoid metabolism	endocrine/metabolic											TRUE
608	Other disorders of male genital organs	genitourinary											TRUE
385	Other disorders of middle ear and mastoid	sense organs											TRUE
253.7	Other disorders of neurohypophysis	endocrine/metabolic											TRUE
251	Other disorders of pancreatic internal secretion	endocrine/metabolic											TRUE
603	Other disorders of testis	genitourinary											TRUE
384	Other disorders of tympanic membrane	sense organs											TRUE
597	Other disorders of urethra and urinary tract	genitourinary											TRUE
426.25	Other heart block	circulatory system											TRUE
282.9	Other hereditary hemolytic anemias	hematopoietic											TRUE
425.12	Other hypertrophic cardiomyopathy	circulatory system											TRUE
715	Other inflammatory spondylopathies	musculoskeletal											TRUE
560.4	Other intestinal obstruction	digestive											TRUE
306	Other mental disorder	mental disorders											TRUE
172.2	Other non-epithelial cancer of skin	neoplasms											TRUE
362.3	Other nondiabetic retinopathy	sense organs											TRUE
613	Other nonmalignant breast conditions	genitourinary											TRUE
263	Other nutritional deficiency	endocrine/metabolic											TRUE
344	Other paralytic syndromes	neurological											TRUE
290.3	Other persistent mental disorders due to conditions classified elsewhere	mental disorders											TRUE
1004	Other signs and symptoms involving emotional state	NULL											TRUE
610.8	Other specified benign mammary dysplasias	genitourinary											TRUE
752.2	Other specified congenital anomalies of nervous system	congenital anomalies											TRUE
709.6	Other specified diffuse diseases of connective tissue	dermatologic											TRUE
527.8	Other specified diseases of the salivary glands	digestive											TRUE
270.38	Other specified disorders of plasma protein metabolism	endocrine/metabolic											TRUE
743.13	Other specified osteoporosis	musculoskeletal											TRUE
443.8	Other specified peripheral vascular diseases	circulatory system											TRUE
724.9	Other unspecified back disorders	musculoskeletal											TRUE
381.9	Otorrhea	sense organs											TRUE
383	Otosclerosis	sense organs											TRUE
278	Overweight, obesity and other hyperalimentation	endocrine/metabolic											TRUE
716.8	Palindromic rheumatism	musculoskeletal											TRUE
157	Pancreatic cancer	neoplasms											TRUE
284.1	Pancytopenia	hematopoietic											TRUE
729.3	Panniculitis	musculoskeletal											TRUE
473.3	Paralysis/spasm of vocal cords or larynx	respiratory											TRUE
560.1	Paralytic ileus	digestive											TRUE
378.5	Paralytic strabismus	sense organs											TRUE
295.2	Paranoid disorders	mental disorders											TRUE
270.32	Paraproteinemia	endocrine/metabolic											TRUE
696.2	Parapsoriasis	dermatologic											TRUE
332	Parkinson's disease	neurological											TRUE
427.1	Paroxysmal tachycardia, unspecified	circulatory system											TRUE
743.2	Pathologic fracture	musculoskeletal											TRUE
743.21	Pathologic fracture of vertebrae	musculoskeletal											TRUE
742.2	Pathological, developmental or recurrent dislocation	musculoskeletal											TRUE
756.2	Pectus and other congenital anomalies of ribs/sternum	congenital anomalies											TRUE
756.22	Pectus carinatum	congenital anomalies											TRUE
756.21	Pectus excavatum	congenital anomalies											TRUE
132.1	Pediculosis and phthirus infestation	infectious diseases											TRUE
614.3	Pelvic inflammatory disease (PID)	genitourinary											TRUE
695.22	Pemphigus and pemphigoid	dermatologic											TRUE
384.4	Perforation of tympanic membrane	sense organs											TRUE
656.6	Perinatal disorders of digestive system	pregnancy complications											TRUE
656.8	Perinatal jaundice	pregnancy complications											TRUE
443.7	Peripheral angiopathy in diseases classified elsewhere	circulatory system											TRUE
337.1	Peripheral autonomic neuropathy	neurological											TRUE
443.9	Peripheral vascular disease, unspecified	circulatory system											TRUE
560.3	Peritoneal or intestinal adhesions	digestive											TRUE
567	Peritonitis and retroperitoneal infections	digestive											TRUE
281.11	Pernicious anemia	hematopoietic											TRUE
789.1	Persistent vomiting	symptoms											TRUE
301	Personality disorders	mental disorders											TRUE
270.12	Phenylketonuria [PKU]	endocrine/metabolic											TRUE
325	Phlebitis and thrombophlebitis of intracranial venous sinuses	neurological											TRUE
451.2	Phlebitis and thrombophlebitis of lower extremities	circulatory system											TRUE
379.51	Pigmentary iris degeneration	sense organs											TRUE
686.3	Pilonidal cyst	dermatologic											TRUE
253.5	Pituitary dwarfism	endocrine/metabolic											TRUE
253.2	Pituitary hypofunction	endocrine/metabolic											TRUE
727.8	Plica syndrome	musculoskeletal											TRUE
480.11	Pneumococcal pneumonia	respiratory											TRUE
480.3	Pneumonia due to fungus (mycoses)	respiratory											TRUE
501	Pneumonitis due to inhalation of food or vomitus	respiratory											TRUE
975	Poisoning by agents primarily acting on the smooth and skeletal muscles and respiratory system	injuries & poisonings											TRUE
964	Poisoning by agents primarily affecting blood constituents	injuries & poisonings											TRUE
976	Poisoning by agents primarily affecting skin & mucous membrane, ophthalmological, otorhinolaryngological, & dental drugs	injuries & poisonings											TRUE
972	Poisoning by agents primarily affecting the cardiovascular system	injuries & poisonings											TRUE
973	Poisoning by agents primarily affecting the gastrointestinal system	injuries & poisonings											TRUE
965	Poisoning by analgesics, antipyretics, and antirheumatics	injuries & poisonings											TRUE
960	Poisoning by antibiotics	injuries & poisonings											TRUE
966	Poisoning by anticonvulsants and anti-Parkinsonism drugs	injuries & poisonings											TRUE
971	Poisoning by drugs primarily affecting the autonomic nervous system	injuries & poisonings											TRUE
962	Poisoning by hormones and synthetic substitutes	injuries & poisonings											TRUE
961	Poisoning by other anti-infectives	injuries & poisonings											TRUE
963	Poisoning by primarily systemic agents	injuries & poisonings											TRUE
969	Poisoning by psychotropic agents	injuries & poisonings											TRUE
974	Poisoning by water, mineral, and uric acid metabolism drugs	injuries & poisonings											TRUE
446.6	Polyarteritis nodosa	circulatory system											TRUE
270.31	Polyclonal hypergammaglobulinemia	endocrine/metabolic											TRUE
200.1	Polycythemia vera	neoplasms											TRUE
289.8	Polycythemia, secondary	hematopoietic											TRUE
276.8	Polydipsia	endocrine/metabolic											TRUE
259.8	Polyglandular activity in multiple endocrine adenomatosis	endocrine/metabolic											TRUE
717	Polymyalgia Rheumatica	musculoskeletal											TRUE
316.1	Polyneuropathy due to drugs	mental disorders											TRUE
250.6	Polyneuropathy in diabetes	endocrine/metabolic											TRUE
622	Polyp of female genital organs	genitourinary											TRUE
571.81	Portal hypertension	digestive											TRUE
258.1	Postablative ovarian failure	endocrine/metabolic											TRUE
502	Postinflammatory pulmonary fibrosis	respiratory											TRUE
627.1	Postmenopausal bleeding	genitourinary											TRUE
958.1	Postoperative shock	injuries & poisonings											TRUE
452.8	Postphlebitic syndrome	circulatory system											TRUE
783.1	Postprocedural fever	symptoms											TRUE
876	Posttraumatic wound infection not elsewhere classified	injuries & poisonings											TRUE
259.4	Precocious sexual development and puberty NEC	endocrine/metabolic											TRUE
367.4	Presbyopia	sense organs											TRUE
365.2	Primary angle-closure glaucoma	sense organs											TRUE
571.6	Primary biliary cirrhosis	digestive											TRUE
365.11	Primary open angle glaucoma	sense organs											TRUE
415.21	Primary pulmonary hypertension	circulatory system											TRUE
618.5	Prolapse of vaginal vault after hysterectomy	genitourinary											TRUE
580.11	Proliferative glomerulonephritis	genitourinary											TRUE
260	Protein-calorie malnutrition	endocrine/metabolic											TRUE
696.4	Psoriasis	dermatologic											TRUE
696.42	Psoriatic arthropathy	dermatologic											TRUE
303	Psychogenic and somatoform disorders	mental disorders											TRUE
368.91	Psychophysical visual disturbances	sense organs											TRUE
295.3	Psychosis	mental disorders											TRUE
374.3	Ptosis of eyelid	sense organs											TRUE
503	Pulmonary congestion and hypostasis	respiratory											TRUE
415	Pulmonary heart disease	circulatory system											TRUE
509.3	Pulmonary insufficiency or respiratory failure following trauma and surgery	respiratory											TRUE
522.1	Pulpitis and necrosis of tooth pulp	digestive											TRUE
686.5	Pyoderma	dermatologic											TRUE
711.1	Pyogenic arthritis	musculoskeletal											TRUE
686.4	Pyogenic granuloma	dermatologic											TRUE
287.4	Qualitative platelet defects	hematopoietic											TRUE
196	Radiotherapy	neoplasms											TRUE
711.2	Reiter's disease	musculoskeletal											TRUE
585.31	Renal dialysis	genitourinary											TRUE
585.2	Renal failure NOS	genitourinary											TRUE
588.1	Renal osteodystrophy	genitourinary											TRUE
580.4	Renal sclerosis, NOS	genitourinary											TRUE
513	Respiratory abnormalities	respiratory											TRUE
509.5	Respiratory arrest	respiratory											TRUE
519.2	Respiratory complications	respiratory											TRUE
656.2	Respiratory conditions of fetus and newborn	pregnancy complications											TRUE
509.1	Respiratory failure	respiratory											TRUE
509	Respiratory failure, insufficiency, arrest	respiratory											TRUE
509.2	Respiratory insufficiency	respiratory											TRUE
327.71	Restless legs syndrome	neurological											TRUE
202.22	Reticulosarcoma	neoplasms											TRUE
361.1	Retinal detachment with retinal defect	sense organs											TRUE
362.9	Retinal edema	sense organs											TRUE
362.8	Retinal hemorrhage/ischemia	sense organs											TRUE
362.4	Retinal vascular changes and abnomalities	sense organs											TRUE
362.1	Retinopathy of prematurity	sense organs											TRUE
361.2	Retinoschisis and retinal cysts	sense organs											TRUE
772.4	Rhabdomyolysis	symptoms											TRUE
394	Rheumatic disease of the heart valves	circulatory system											TRUE
41.21	Rheumatic fever / chorea	infectious diseases											TRUE
729.1	Rheumatism, unspecified and fibrositis	musculoskeletal											TRUE
714	Rheumatoid arthritis and other inflammatory polyarthropathies	musculoskeletal											TRUE
261.41	Rickets or osteomalacia	endocrine/metabolic											TRUE
426.31	Right bundle branch block	circulatory system											TRUE
840.2	Rotator cuff (capsule) sprain	injuries & poisonings											TRUE
727.5	Rupture of synovium	musculoskeletal											TRUE
727.6	Rupture of tendon, nontraumatic	musculoskeletal											TRUE
715.1	Sacroiliitis NEC	musculoskeletal											TRUE
965.3	Salicylates causing adverse effects in therapeutic use	injuries & poisonings											TRUE
697	Sarcoidosis	dermatologic											TRUE
301.1	Schizoid personality disorder	mental disorders											TRUE
295.1	Schizophrenia	mental disorders											TRUE
295	Schizophrenia and other psychotic disorders	mental disorders											TRUE
722.3	Schmorl's nodes	musculoskeletal											TRUE
379.1	Scleritis and episcleritis	sense organs											TRUE
706.3	Seborrhea	dermatologic											TRUE
426.23	Second degree AV block	circulatory system											TRUE
249	Secondary diabetes mellitus	endocrine/metabolic											TRUE
588.2	Secondary hyperparathyroidism (of renal origin)	genitourinary											TRUE
198.6	Secondary malignancy of bone	neoplasms											TRUE
198.5	Secondary malignancy of brain/spine	neoplasms											TRUE
198.1	Secondary malignancy of lymph nodes	neoplasms											TRUE
198.2	Secondary malignancy of respiratory organs	neoplasms											TRUE
198	Secondary malignant neoplasm	neoplasms											TRUE
198.3	Secondary malignant neoplasm of digestive systems	neoplasms											TRUE
198.4	Secondary malignant neoplasm of liver	neoplasms											TRUE
425.2	Secondary/extrinsic cardiomyopathies	circulatory system											TRUE
366.2	Senile cataract	sense organs											TRUE
743.12	Senile osteoporosis	musculoskeletal											TRUE
362.31	Separation of retinal layers	sense organs											TRUE
994.21	Septic shock	injuries & poisonings											TRUE
260.2	severe protein-calorie malnutrition	endocrine/metabolic											TRUE
302	Sexual and gender identity disorders	mental disorders											TRUE
797	Shock	symptoms											TRUE
264.1	Short stature	endocrine/metabolic											TRUE
527.2	Sialoadenitis	digestive											TRUE
528.7	Sialolithiasis	digestive											TRUE
282.5	Sickle cell anemia	hematopoietic											TRUE
427.8	Sinoatrial node dysfunction (Bradycardia)	circulatory system											TRUE
327.72	Sleep related leg cramps	neurological											TRUE
327.7	Sleep related movement disorders	neurological											TRUE
586.11	Small kidney	genitourinary											TRUE
303.4	Somatoform disorder	mental disorders											TRUE
315.2	Speech and language disorder	mental disorders											TRUE
752.11	Spina bifida	congenital anomalies											TRUE
952	Spinal cord injury without evidence of spinal bone injury	injuries & poisonings											TRUE
720	Spinal stenosis	musculoskeletal											TRUE
720.1	Spinal stenosis of lumbar region	musculoskeletal											TRUE
334.1	Spinocerebellar disease	neurological											TRUE
130	Spirochetal infection	infectious diseases											TRUE
579.2	Splenomegaly	digestive											TRUE
754.2	Spondylolisthesis, congenital	congenital anomalies											TRUE
721.2	Spondylosis with myelopathy	musculoskeletal											TRUE
172.22	Squamous cell carcinoma	neoplasms											TRUE
41.1	Staphylococcus infections	infectious diseases											TRUE
528.1	Stomatitis and mucositis	digestive											TRUE
528.11	Stomatitis and mucositis (ulcerative)	digestive											TRUE
378.1	Strabismus (not specified as paralytic)	sense organs											TRUE
378	Strabismus and other disorders of binocular eye movements	sense organs											TRUE
743.4	Stress fracture	musculoskeletal											TRUE
530.3	Stricture and stenosis of esophagus	digestive											TRUE
447.1	Stricture of artery	circulatory system											TRUE
586.4	Stricture/obstruction of ureter	genitourinary											TRUE
430.1	Subarachnoid hemorrhage	circulatory system											TRUE
818.2	Subarachnoid hemorrhage (injury)	injuries & poisonings											TRUE
430.3	Subdural hemorrhage	circulatory system											TRUE
818.1	Subdural hemorrhage (injury)	injuries & poisonings											TRUE
297	Suicidal ideation or attempt	mental disorders											TRUE
297.2	Suicide or self-inflicted injury	mental disorders											TRUE
910	Superficial injury, infected	injuries & poisonings											TRUE
370.2	Superficial keratitis	sense organs											TRUE
292.12	Symbolic dysfunction	mental disorders											TRUE
293	Symptoms involving head and neck	mental disorders											TRUE
781	Symptoms involving nervous and musculoskeletal systems	symptoms											TRUE
726.2	Synoviopathy	musculoskeletal											TRUE
994.1	Systemic inflammatory response syndrome (SIRS)	injuries & poisonings											TRUE
709.3	Systemic sclerosis	dermatologic											TRUE
446.7	Takayasu's disease	circulatory system											TRUE
526.4	Temporomandibular joint disorders	digestive											TRUE
257.1	Testicular hypofunction	endocrine/metabolic											TRUE
446.8	Thrombotic microangiopathy	circulatory system											TRUE
246.2	Thyroid cyst	endocrine/metabolic											TRUE
242.31	Thyrotoxic exophthalmos	endocrine/metabolic											TRUE
333.3	Tics and choreas	neurological											TRUE
313.2	Tics and stuttering	mental disorders											TRUE
521.4	Tooth complications likely association with other diseases	digestive											TRUE
333.4	Torsion dystonia	neurological											TRUE
723.1	Torticollis	musculoskeletal											TRUE
981	Toxic effect of (non-ethyl) alcohol and petroleum and other solvents	injuries & poisonings											TRUE
986	Toxic effect of carbon monoxide	injuries & poisonings											TRUE
983	Toxic effect of corrosive aromatics, acids, and caustic alkalis	injuries & poisonings											TRUE
988	Toxic effect of noxious substances eaten as food	injuries & poisonings											TRUE
987	Toxic effect of other gases, fumes, or vapors	injuries & poisonings											TRUE
985	Toxic effect of other metals	injuries & poisonings											TRUE
989	Toxic effect of other substances, chiefly nonmedicinal as to source	injuries & poisonings											TRUE
913	Toxic effect of venom	injuries & poisonings											TRUE
695.1	Toxic erythema	dermatologic											TRUE
569.1	Toxic gastroenteritis and colitis	digestive											TRUE
362.5	Toxic maculopathy of retina	sense organs											TRUE
242.2	Toxic multinodular goiter	endocrine/metabolic											TRUE
519.1	Tracheostomy complications	respiratory											TRUE
292.5	Transient alteration of awareness	mental disorders											TRUE
433.31	Transient cerebral ischemia	circulatory system											TRUE
656.26	Transitory tachypnea or apnea of newborn	pregnancy complications											TRUE
872	Traumatic amputation	injuries & poisonings											TRUE
958.2	Traumatic and surgical subcutaneous emphysema	injuries & poisonings											TRUE
836	Traumatic arthropathy	injuries & poisonings											TRUE
366.3	Traumatic cataract	sense organs											TRUE
352.1	Trigeminal nerve disorders [CN5]	neurological											TRUE
385.5	Tympanosclerosis and middle ear disease related to otitis media	sense organs											TRUE
250.11	Type 1 diabetes with ketoacidosis	endocrine/metabolic											TRUE
250.14	Type 1 diabetes with neurological manifestations	endocrine/metabolic											TRUE
250.13	Type 1 diabetes with ophthalmic manifestations	endocrine/metabolic											TRUE
250.12	Type 1 diabetes with renal manifestations	endocrine/metabolic											TRUE
250.21	Type 2 diabetes with ketoacidosis	endocrine/metabolic											TRUE
250.24	Type 2 diabetes with neurological manifestations	endocrine/metabolic											TRUE
250.23	Type 2 diabetes with ophthalmic manifestations	endocrine/metabolic											TRUE
250.22	Type 2 diabetes with renal manifestations	endocrine/metabolic											TRUE
530.12	Ulcer of esophagus	digestive											TRUE
556.1	Ulceration of intestine	digestive											TRUE
556	Ulceration of the lower GI tract	digestive											TRUE
555.21	Ulcerative colitis (chronic)	digestive											TRUE
736.6	Unequal leg length (acquired)	musculoskeletal											TRUE
272.9	Unspecified disorder of lipoid metabolism	endocrine/metabolic											TRUE
716.2	Unspecified monoarthritis	musculoskeletal											TRUE
710.19	Unspecified osteomyelitis	musculoskeletal											TRUE
716.1	Unspecified polyarthropathy or polyarthritis	musculoskeletal											TRUE
411.1	Unstable angina (intermediate coronary syndrome)	circulatory system											TRUE
599.7	Urethral discharge	genitourinary											TRUE
597.8	Urethral hypermobility/ISD	genitourinary											TRUE
597.1	Urethral stricture (not specified as infectious)	genitourinary											TRUE
592.3	Urethral stricture due to infecton	genitourinary											TRUE
592.21	Urethral syndrome	genitourinary											TRUE
592.2	Urethritis and urethral syndrome	genitourinary											TRUE
594	Urinary calculus	genitourinary											TRUE
597.2	Urinary complications NEC	genitourinary											TRUE
599.1	Urinary obstruction	genitourinary											TRUE
618.2	Uterine/Uterovaginal prolapse	genitourinary											TRUE
371.1	Uveitis, noninfectious or NOS	sense organs											TRUE
618.6	Vaginal enterocele, congenital or acquired	genitourinary											TRUE
79.1	Varicella infection	infectious diseases											TRUE
454	Varicose veins	circulatory system											TRUE
856	Vascular complications of surgery and medical procedures	injuries & poisonings											TRUE
586.3	Vascular disorders of kidney/hypertrophy	genitourinary											TRUE
694.3	Vascular disorders of skin	dermatologic											TRUE
217	Vascular hamartomas and non-neoplastic nevi	neoplasms											TRUE
441	Vascular insufficiency of intestine	circulatory system											TRUE
90.3	Venereal diseases due to Chlamydia trachomatis	infectious diseases											TRUE
427.41	Ventricular fibrillation and flutter	circulatory system											TRUE
386	Vertiginous syndromes and other disorders of vestibular system	sense organs											TRUE
586.12	Vesicoureteral reflux	genitourinary											TRUE
741.6	Villonodular synovitis	musculoskeletal											TRUE
70	Viral hepatitis	infectious diseases											TRUE
70.1	Viral hepatitis A	infectious diseases											TRUE
70.3	Viral hepatitis C	infectious diseases											TRUE
480.2	Viral pneumonia	respiratory											TRUE
261.1	Vitamin A deficiency	endocrine/metabolic											TRUE
261	Vitamin deficiency	endocrine/metabolic											TRUE
286.11	Von willebrand's disease	hematopoietic											TRUE
446.4	Wegener's granulomatosis	circulatory system											TRUE

## Sheet: Stanford <35 results
phecode	phenotype	category	rpl_count	control_count	rpl_prop	control_prop	odds_ratio_crude	p_value_crude	adj_p_value_crude	odds_ratio_w_age_re	p_value_w_age_re	adj_p_value_w_age_re	count_under10
785	Abdominal pain	symptoms	631	5070	0.287603	0.200055	1.61429	5.76667e-22	2.73747e-20	1.89737	4.06756e-36	2.85437e-34	FALSE
286.9	Abnormal coagulation profile	hematopoietic	11	20	0.00501367	0.000789173	6.38005	8.30224e-07	1.30095e-05	6.48708	1.0756e-06	1.66924e-05	FALSE
426.7	Abnormal electrocardiogram [ECG] [EKG]	circulatory system	52	350	0.023701	0.0138105	1.73354	0.000252141	0.00246464	1.81074	9.48853e-05	0.00109389	FALSE
514	Abnormal findings examination of lungs	respiratory	20	204	0.00911577	0.00804956	1.13367	0.594008	0.970648	1.23774	0.368904	0.759539	FALSE
564.8	Abnormal findings on exam of gastrointestinal tract/ abdominal area	digestive	14	69	0.00638104	0.00272265	2.35232	0.00361652	0.0241201	2.45907	0.00259551	0.0184544	FALSE
396	Abnormal heart sounds	circulatory system	24	170	0.0109389	0.00670797	1.63771	0.0244213	0.108286	1.6419	0.0252458	0.11543	FALSE
350.1	Abnormal involuntary movements	neurological	12	145	0.00546946	0.0057215	0.955707	0.880443	0.970648	0.970032	0.920169	1	FALSE
611.1	Abnormal mammogram	genitourinary	18	89	0.00820419	0.00351182	2.34722	0.00100475	0.00811241	1.99715	0.00805901	0.0472987	FALSE
792	Abnormal Papanicolaou smear of cervix and cervical HPV	genitourinary	52	421	0.023701	0.0166121	1.43709	0.0147468	0.0736882	1.32126	0.0632909	0.224509	FALSE
573.7	Abnormal results of function study of liver	digestive	12	91	0.00546946	0.00359074	1.52609	0.169829	0.443534	1.42267	0.256362	0.597931	FALSE
246.7	Abnormal results of function study of thyroid	endocrine/metabolic	27	107	0.0123063	0.00422207	2.93861	6.41457e-07	1.01501e-05	2.40911	5.88404e-05	0.000717662	FALSE
655.1	Abnormality in fetal heart rate or rhythm	pregnancy complications	190	7240	0.0865998	0.28568	0.237065	1.21092e-77	1.95443e-75	0.250142	1.95733e-71	3.51015e-69	FALSE
654.1	Abnormality of organs and soft tissues of pelvis complicating pregnancy, childbirth, or the puerperium	pregnancy complications	246	4010	0.112124	0.158229	0.671821	1.21818e-08	2.36884e-07	0.623203	2.2755e-11	5.65024e-10	FALSE
626.11	Absent or infrequent menstruation	genitourinary	499	2249	0.227438	0.0887425	3.02302	2.36757e-88	6.36876e-86	2.82063	3.0032e-75	6.05896e-73	FALSE
706.1	Acne	dermatologic	133	893	0.0606199	0.0352366	1.76686	2.75199e-09	5.51825e-08	1.57069	3.1874e-06	4.67679e-05	FALSE
244.2	Acquired hypothyroidism	endocrine/metabolic	64	369	0.0291705	0.0145602	2.03358	2.33314e-07	3.88215e-06	1.66824	0.0002189	0.00230918	FALSE
483	Acute bronchitis and bronchiolitis	respiratory	33	227	0.015041	0.00895711	1.6896	0.00518809	0.032582	1.54151	0.0223954	0.105076	FALSE
592.11	Acute cystitis	genitourinary	97	622	0.0442115	0.0245433	1.83844	4.7432e-08	8.69946e-07	2.04571	2.76257e-10	5.94505e-09	FALSE
614.31	Acute inflammatory pelvic disease	genitourinary	10	57	0.00455789	0.00224914	2.0312	0.0391572	0.157999	3.15414	0.00104316	0.00825325	FALSE
338.1	Acute pain	neurological	72	527	0.0328168	0.0207947	1.59775	0.00024203	0.00241134	1.7618	1.27128e-05	0.000175371	FALSE
577.1	Acute pancreatitis	digestive	10	57	0.00455789	0.00224914	2.0312	0.0391572	0.157999	2.72461	0.00422545	0.0280654	FALSE
465.2	Acute pharyngitis	respiratory	160	1206	0.0729262	0.0475871	1.57436	1.9733e-07	3.31761e-06	1.70269	1.94763e-09	3.92934e-08	FALSE
285.1	Acute posthemorrhagic anemia	hematopoietic	45	795	0.0205105	0.0313696	0.646584	0.00486871	0.0308161	0.741034	0.0548826	0.204411	FALSE
300.8	Acute reaction to stress	mental disorders	12	35	0.00546946	0.00138105	3.97664	3.83084e-05	0.000486849	4.04608	4.30005e-05	0.000538006	FALSE
464	Acute sinusitis	respiratory	68	389	0.0309936	0.0153494	2.05181	7.08502e-08	1.25662e-06	1.8162	1.01802e-05	0.000142877	FALSE
465	Acute upper respiratory infections of multiple or unspecified sites	respiratory	175	1407	0.079763	0.0555183	1.47455	3.25057e-06	4.90319e-05	1.50021	1.58803e-06	2.418e-05	FALSE
304	Adjustment reaction	mental disorders	74	301	0.0337284	0.011877	2.90401	5.76067e-16	2.06616e-14	2.72889	5.53301e-14	1.82251e-12	FALSE
300.12	Agorophobia, social phobia, and panic disorder	mental disorders	29	221	0.0132179	0.00872036	1.52266	0.0344046	0.142018	1.53426	0.0330535	0.140761	FALSE
317.1	Alcoholism	mental disorders	15	124	0.00683683	0.00489287	1.40004	0.21988	0.540162	1.75395	0.0438067	0.173294	FALSE
371.21	Allergic conjunctivitis	sense organs	13	71	0.00592525	0.00280156	2.12163	0.0128984	0.0669387	1.86259	0.0415328	0.165108	FALSE
476	Allergic rhinitis	respiratory	110	926	0.0501367	0.0365387	1.3918	0.00138745	0.0109823	1.21742	0.0596172	0.216187	FALSE
949	Allergies, other	injuries & poisonings	41	320	0.0186873	0.0126268	1.48912	0.0173705	0.0847008	1.42321	0.0368968	0.153483	FALSE
704.1	Alopecia	dermatologic	50	317	0.0227894	0.0125084	1.8411	7.24766e-05	0.000872964	1.5324	0.00593534	0.0368447	FALSE
291.8	Alteration of consciousness	mental disorders	10	40	0.00455789	0.00157835	2.89641	0.00268228	0.0194134	3.10145	0.00169774	0.0125695	FALSE
565	Anal and rectal conditions	digestive	31	229	0.0141294	0.00903603	1.57176	0.0189343	0.0901472	1.53708	0.0270438	0.120577	FALSE
644	Anemia during pregnancy	pregnancy complications	148	2937	0.0674567	0.11589	0.551844	1.00338e-11	2.49147e-10	0.590895	2.28802e-09	4.50349e-08	FALSE
635.2	Antepartum hemorrhage, abruptio placentae, and placenta previa	pregnancy complications	298	2266	0.135825	0.0894133	1.60065	1.09626e-12	2.94895e-11	1.59112	3.6512e-12	9.66071e-11	FALSE
300.1	Anxiety disorder	mental disorders	233	1649	0.106199	0.0650673	1.70725	4.32222e-13	1.18238e-11	1.67147	8.6028e-12	2.2395e-10	FALSE
427.5	Arrhythmia (cardiac) NOS	circulatory system	26	202	0.0118505	0.00797064	1.49261	0.0559646	0.208126	1.63529	0.0204623	0.0985142	FALSE
572	Ascites (non malignant)	digestive	20	87	0.00911577	0.0034329	2.67064	7.97052e-05	0.000936842	3.04482	1.26815e-05	0.000175371	FALSE
495	Asthma	respiratory	138	1486	0.0628988	0.0586355	1.07759	0.416204	0.821549	1.11593	0.239204	0.573663	FALSE
495.2	Asthma with exacerbation	respiratory	45	362	0.0205105	0.014284	1.44503	0.021123	0.0960354	1.45619	0.0200113	0.0972837	FALSE
367.2	Astigmatism	sense organs	25	256	0.0113947	0.0101014	1.12951	0.563328	0.970648	0.967171	0.87488	1	FALSE
939	Atopic/contact dermatitis due to other or unspecified	dermatologic	139	1137	0.0633546	0.0448645	1.44001	8.43336e-05	0.00097924	1.29116	0.00635582	0.0390049	FALSE
535.2	Atrophic gastritis	digestive	17	62	0.0077484	0.00244643	3.18415	2.48212e-05	0.000329387	3.0068	7.69067e-05	0.000899474	FALSE
313.1	Attention deficit hyperactivity disorder	mental disorders	16	157	0.00729262	0.006195	1.17848	0.532937	0.970648	1.15609	0.585506	1	FALSE
760	Back pain	symptoms	244	2151	0.111212	0.0848755	1.34913	2.84687e-05	0.000367588	1.44264	4.38942e-07	7.08453e-06	FALSE
38.3	Bacteremia	infectious diseases	10	41	0.00455789	0.0016178	2.82565	0.00328936	0.0226882	3.3144	0.000834719	0.00687366	FALSE
41	Bacterial infection NOS	infectious diseases	75	518	0.0341841	0.0204396	1.69625	2.58699e-05	0.000339463	1.84695	1.62453e-06	2.45045e-05	FALSE
610.4	Benign neoplasm of breast	genitourinary	16	147	0.00729262	0.00580042	1.25915	0.383101	0.778746	1.17965	0.53427	0.963478	FALSE
220	Benign neoplasm of ovary	neoplasms	10	142	0.00455789	0.00560313	0.8126	0.526862	0.970648	0.794771	0.486203	0.909307	FALSE
227.3	Benign neoplasm of pituitary gland and craniopharyngeal duct (pouch)	neoplasms	10	53	0.00455789	0.00209131	2.18484	0.0236904	0.106212	1.71975	0.119439	0.346094	FALSE
216	Benign neoplasm of skin	neoplasms	101	909	0.0460346	0.0358679	1.29713	0.015357	0.0762652	1.06812	0.547845	0.978078	FALSE
296.1	Bipolar	mental disorders	20	150	0.00911577	0.00591879	1.54511	0.0687961	0.24034	1.53259	0.0774967	0.257366	FALSE
578.2	Blood in stool	digestive	33	164	0.015041	0.00647121	2.34452	9.18292e-06	0.000130953	2.44087	4.76198e-06	6.86235e-05	FALSE
497	Bronchitis	respiratory	14	78	0.00638104	0.00307777	2.08016	0.0118694	0.0630173	2.07707	0.0131494	0.0691305	FALSE
1000	Burns	NULL	11	79	0.00501367	0.00311723	1.61144	0.139127	0.387827	1.62429	0.13645	0.378402	FALSE
574.2	Calculus of bile duct	digestive	16	131	0.00729262	0.00516908	1.41383	0.192563	0.483354	1.89082	0.0187271	0.0927162	FALSE
594.1	Calculus of kidney	genitourinary	29	181	0.0132179	0.00714201	1.86212	0.00200855	0.0148706	1.96408	0.000907696	0.00732511	FALSE
112	Candidiasis	infectious diseases	146	954	0.0665451	0.0376435	1.8225	6.21739e-11	1.39373e-09	1.80552	2.47283e-10	5.39343e-09	FALSE
686.1	Carbuncle and furuncle	dermatologic	29	484	0.0132179	0.019098	0.687984	0.0520192	0.195254	0.608519	0.010165	0.0567694	FALSE
747.1	Cardiac congenital anomalies	congenital anomalies	18	241	0.00820419	0.00950953	0.861598	0.543772	0.970648	0.938267	0.796398	1	FALSE
747.11	Cardiac shunt/ heart septal defect	congenital anomalies	11	182	0.00501367	0.00718147	0.696619	0.245492	0.566035	0.722446	0.299046	0.663558	FALSE
557.1	Celiac disease	digestive	13	65	0.00592525	0.00256481	2.31802	0.00578562	0.0353712	1.95646	0.0297209	0.129204	FALSE
681.3	Cellulitis and abscess of arm/hand	dermatologic	10	66	0.00455789	0.00260427	1.75359	0.0986135	0.297094	1.9699	0.0504223	0.193339	FALSE
681.1	Cellulitis and abscess of fingers/toes	dermatologic	16	129	0.00729262	0.00509016	1.43587	0.173804	0.450271	1.46776	0.154373	0.410814	FALSE
636.8	Cervical incompetence	pregnancy complications	87	178	0.0396536	0.00702364	5.83756	2.68193e-40	1.88202e-38	6.24275	4.27359e-41	3.44879e-39	FALSE
180.3	Cervical intraepithelial neoplasia [CIN] [Cervical dysplasia]	neoplasms	36	257	0.0164084	0.0101409	1.62836	0.00656173	0.0388105	1.45558	0.0380155	0.157365	FALSE
761	Cervicalgia	symptoms	85	625	0.038742	0.0246616	1.59395	7.5786e-05	0.000906064	1.60595	7.03306e-05	0.000828567	FALSE
614.51	Cervicitis and endocervicitis	genitourinary	43	369	0.0195989	0.0145602	1.35298	0.0631584	0.226528	1.30801	0.102703	0.31276	FALSE
574.3	Cholecystitis without cholelithiasis	digestive	14	97	0.00638104	0.00382749	1.67145	0.0732447	0.25046	2.22615	0.00610482	0.0376076	FALSE
574.1	Cholelithiasis	digestive	45	342	0.0205105	0.0134949	1.53076	0.00785227	0.045425	1.95973	3.87031e-05	0.000491864	FALSE
574.11	Cholelithiasis with acute cholecystitis	digestive	12	58	0.00546946	0.0022886	2.39752	0.00595063	0.0361065	3.3169	0.000217964	0.00230918	FALSE
574.12	Cholelithiasis with other cholecystitis	digestive	12	140	0.00546946	0.00552421	0.990035	0.973513	0.978417	1.3436	0.333541	0.710204	FALSE
758.1	Chromosomal anomalies	congenital anomalies	40	92	0.0182315	0.00363019	5.09689	1.34851e-17	5.58077e-16	4.57707	4.78527e-15	1.71632e-13	FALSE
798.1	Chronic fatigue syndrome	symptoms	10	33	0.00455789	0.00130213	3.51177	0.000514346	0.00453637	3.38966	0.000880954	0.00718111	FALSE
614.32	Chronic inflammatory pelvic disease	genitourinary	18	18	0.00820419	0.000710255	11.6383	2.03568e-13	5.86712e-12	10.89	2.21674e-12	5.96303e-11	FALSE
245.21	Chronic lymphocytic thyroiditis	endocrine/metabolic	49	242	0.0223336	0.00954899	2.36943	5.01374e-08	9.09234e-07	1.91417	4.89595e-05	0.000607851	FALSE
338.2	Chronic pain	neurological	99	664	0.0451231	0.0262005	1.75635	3.13611e-07	5.16497e-06	1.5977	2.56954e-05	0.000337174	FALSE
472	Chronic pharyngitis and nasopharyngitis	respiratory	17	95	0.0077484	0.00374857	2.07536	0.00573362	0.0351866	1.7862	0.0295687	0.129096	FALSE
475	Chronic sinusitis	respiratory	38	194	0.01732	0.00765497	2.28483	3.8192e-06	5.70758e-05	2.06459	6.06122e-05	0.000724653	FALSE
474.2	Chronic tonsillitis and adenoiditis	respiratory	15	107	0.00683683	0.00422207	1.62357	0.0797659	0.262998	1.77659	0.0403018	0.163035	FALSE
286.3	Coagulation defects complicating pregnancy or postpartum	hematopoietic	83	1301	0.0378304	0.0513357	0.72658	0.00566964	0.0350606	0.715719	0.00397755	0.026749	FALSE
669	Complications of labor and delivery NEC	pregnancy complications	120	2580	0.0546946	0.101803	0.510484	2.68678e-12	6.99429e-11	0.497783	5.25714e-13	1.51518e-11	FALSE
1011	Complications of surgical and medical procedures	NULL	38	288	0.01732	0.0113641	1.53333	0.0140517	0.0710955	1.59333	0.00811756	0.0472987	FALSE
751.11	Congenital anomalies of female genital organs	congenital anomalies	82	169	0.0373747	0.00666851	5.78343	7.61132e-38	5.11861e-36	5.8796	4.15768e-37	3.05023e-35	FALSE
369.5	Conjunctivitis, infectious	sense organs	27	264	0.0123063	0.0104171	1.18362	0.406969	0.810924	1.09929	0.644209	1	FALSE
563	Constipation	digestive	114	1065	0.0519599	0.0420234	1.24941	0.0277198	0.119306	1.27256	0.0182984	0.0914351	FALSE
916	Contusion	injuries & poisonings	39	365	0.0177758	0.0144024	1.23846	0.208253	0.518705	1.4842	0.0220234	0.10424	FALSE
512.8	Cough	respiratory	166	1251	0.0756609	0.0493627	1.57636	1.12237e-07	1.92946e-06	1.6536	7.58983e-09	1.45833e-07	FALSE
610.1	Cystic mastopathy	genitourinary	33	186	0.015041	0.0073393	2.0654	0.000137188	0.00149609	1.75533	0.00337606	0.0230888	FALSE
592.1	Cystitis	genitourinary	22	111	0.0100273	0.00437991	2.30246	0.000374733	0.00349607	2.2466	0.00067527	0.0058596	FALSE
288.1	Decreased white blood cell count	hematopoietic	10	48	0.00455789	0.00189401	2.41291	0.0114465	0.0609727	2.20701	0.0242237	0.111706	FALSE
722.6	Degeneration of intervertebral disc	musculoskeletal	14	65	0.00638104	0.00256481	2.49747	0.00195128	0.0145804	2.18525	0.00873583	0.0503558	FALSE
296.2	Depression	mental disorders	67	434	0.0305378	0.017125	1.8079	8.74899e-06	0.000126079	1.92001	1.58024e-06	2.418e-05	FALSE
110.2	Dermatomycoses	infectious diseases	18	92	0.00820419	0.00363019	2.27041	0.00152662	0.011961	2.06984	0.00536154	0.0342036	FALSE
110.11	Dermatophytosis of nail	infectious diseases	12	98	0.00546946	0.00386695	1.41669	0.255999	0.579498	1.32784	0.358693	0.747008	FALSE
649.1	Diabetes or abnormal glucose tolerance complicating pregnancy	pregnancy complications	188	3663	0.0856882	0.144537	0.554689	5.32824e-14	1.6538e-12	0.515028	5.29877e-17	2.37562e-15	FALSE
561.1	Diarrhea	digestive	119	823	0.0542388	0.0324745	1.70864	1.04027e-07	1.825e-06	1.95276	6.53089e-11	1.55013e-09	FALSE
704	Diseases of hair and hair follicles	dermatologic	19	107	0.00865998	0.00422207	2.0603	0.00382859	0.0253252	1.84276	0.0154618	0.0794754	FALSE
703	Diseases of nail, NOS	dermatologic	12	81	0.00546946	0.00319615	1.71518	0.081915	0.262998	1.5644	0.15225	0.407398	FALSE
528	Diseases of the oral soft tissues, excluding lesions specific for gingiva and tongue	digestive	11	79	0.00501367	0.00311723	1.61144	0.139127	0.387827	1.79944	0.0717737	0.243049	FALSE
689	Disorder of skin and subcutaneous tissue NOS	dermatologic	42	316	0.0191431	0.0124689	1.54571	0.00861186	0.048942	1.35788	0.0674476	0.233106	FALSE
372	Disorders of conjunctiva	sense organs	11	69	0.00501367	0.00272265	1.84571	0.0596607	0.216875	1.88224	0.0546505	0.20418	FALSE
275.3	Disorders of magnesium metabolism	endocrine/metabolic	10	50	0.00455789	0.00197293	2.31621	0.0155348	0.0766766	2.43918	0.0118101	0.0643969	FALSE
626	Disorders of menstruation and other abnormal bleeding from female genital tract	genitourinary	255	757	0.116226	0.0298702	4.27124	4.82707e-81	9.73861e-79	4.47514	1.67522e-82	4.50635e-80	FALSE
619.2	Disorders of uterus, NEC	genitourinary	259	783	0.118049	0.0308961	4.19842	1.39859e-80	2.50814e-78	4.10103	2.41511e-75	5.56854e-73	FALSE
379.2	Disorders of vitreous body	sense organs	10	89	0.00455789	0.00351182	1.29923	0.433547	0.849632	1.13239	0.711094	1	FALSE
617	Disorders secondary to childbirth, surgery, trauma	genitourinary	172	1010	0.0783956	0.0398532	2.04938	5.50523e-17	2.20304e-15	2.00409	1.13577e-15	4.70032e-14	FALSE
722.1	Displacement of intervertebral disc	musculoskeletal	20	90	0.00911577	0.00355128	2.58131	0.000133196	0.00146244	2.36967	0.000588328	0.00524619	FALSE
687.4	Disturbance of skin sensation	dermatologic	71	535	0.032361	0.0211104	1.55077	0.000627859	0.0053335	1.5912	0.000346969	0.00343563	FALSE
270.11	Disturbances of sulphur-bearing amino-acid metabolism	endocrine/metabolic	32	32	0.0145852	0.00126268	11.7072	1.10889e-22	5.59295e-21	9.67081	3.56403e-19	1.74314e-17	FALSE
386.9	Dizziness and giddiness (Light-headedness and vertigo)	sense organs	142	1082	0.064722	0.0426942	1.55165	1.87503e-06	2.855e-05	1.76499	1.31664e-09	2.72444e-08	FALSE
375.1	Dry eyes	sense organs	14	104	0.00638104	0.0041037	1.55851	0.120203	0.349563	1.34615	0.300904	0.663558	FALSE
626.2	Dysmenorrhea	genitourinary	78	330	0.0355515	0.0130213	2.79403	9.56805e-16	3.21726e-14	2.68338	3.02161e-14	1.01601e-12	FALSE
277.7	Dysmetabolic syndrome X	endocrine/metabolic	40	28	0.0182315	0.00110484	16.7894	4.15688e-30	2.48489e-28	15.1688	2.75661e-27	1.5342e-25	FALSE
625.1	Dyspareunia	genitourinary	52	394	0.023701	0.0155467	1.53724	0.00396455	0.0261175	1.32517	0.0612902	0.218914	FALSE
536.8	Dyspepsia and other specified disorders of function of stomach	digestive	21	100	0.00957156	0.00394586	2.4395	0.000216299	0.00218191	2.3589	0.000442931	0.00408509	FALSE
532	Dysphagia	digestive	23	120	0.0104831	0.00473504	2.22681	0.000464813	0.00412202	2.29583	0.000353696	0.00348089	FALSE
300.4	Dysthymic disorder	mental disorders	18	78	0.00820419	0.00307777	2.6794	0.000173001	0.00186149	2.50263	0.000567913	0.00510847	FALSE
599.3	Dysuria	genitourinary	194	1438	0.088423	0.0567415	1.61251	2.28448e-09	4.66727e-08	1.70515	4.51132e-11	1.08676e-09	FALSE
41.4	E. coli	infectious diseases	16	177	0.00729262	0.00698418	1.04449	0.86806	0.970648	1.43462	0.174048	0.453087	FALSE
636.2	Early onset of delivery	pregnancy complications	61	261	0.0278031	0.0102987	2.74828	2.20175e-12	5.82561e-11	3.14371	6.34629e-15	2.22672e-13	FALSE
636	Early or threatened labor; hemorrhage in early pregnancy	pregnancy complications	235	2481	0.10711	0.0978969	1.1054	0.16514	0.431986	1.29815	0.000372999	0.00361199	FALSE
782.3	Edema	symptoms	36	335	0.0164084	0.0132186	1.24533	0.214678	0.533062	1.23276	0.240803	0.576539	FALSE
1015	Effects of other external causes	NULL	12	85	0.00546946	0.00335398	1.6342	0.112163	0.329746	1.69527	0.0915603	0.291396	FALSE
288.2	Elevated white blood cell count	hematopoietic	31	256	0.0141294	0.0101014	1.40447	0.0760899	0.257461	1.5274	0.0289714	0.127411	FALSE
615	Endometriosis	genitourinary	68	224	0.0309936	0.00883873	3.58674	8.66415e-20	3.88443e-18	3.06345	2.96394e-15	1.139e-13	FALSE
726.1	Enthesopathy	musculoskeletal	28	189	0.0127621	0.00745768	1.72046	0.00773865	0.0449287	1.48661	0.0536904	0.202468	FALSE
345	Epilepsy, recurrent seizures, convulsions	neurological	17	102	0.0077484	0.00402478	1.9324	0.0122254	0.0644828	2.08905	0.00559259	0.0355372	FALSE
477	Epistaxis or throat hemorrhage	respiratory	12	120	0.00546946	0.00473504	1.15596	0.633084	0.970648	1.27539	0.427583	0.840327	FALSE
401.1	Essential hypertension	circulatory system	75	604	0.0341841	0.023833	1.44969	0.00285779	0.0203193	1.37509	0.0114079	0.0624148	FALSE
381.2	Eustachian tube disorders	sense organs	17	127	0.0077484	0.00501125	1.55047	0.0906813	0.277722	1.38766	0.209383	0.516735	FALSE
626.12	Excessive or frequent menstruation	genitourinary	87	330	0.0396536	0.0130213	3.12973	1.357e-20	6.25771e-19	2.95067	3.89389e-18	1.84845e-16	FALSE
643	Excessive vomiting in pregnancy	pregnancy complications	130	957	0.0592525	0.0377619	1.60495	8.85034e-07	1.3735e-05	1.72379	2.38781e-08	4.48131e-07	FALSE
728.7	Fasciitis	musculoskeletal	14	68	0.00638104	0.00268319	2.38701	0.00311698	0.0218731	2.01172	0.0186523	0.0926304	FALSE
661	Fetal distress and abnormal forces of labor	pregnancy complications	100	3433	0.0455789	0.135461	0.304784	3.12286e-30	1.93858e-28	0.311978	6.19257e-29	3.84416e-27	FALSE
783	Fever of unknown origin	symptoms	114	1036	0.0519599	0.0408791	1.28592	0.0130366	0.0674394	1.52898	3.70566e-05	0.000474677	FALSE
561.2	Flatulence	digestive	48	262	0.0218778	0.0103382	2.14119	1.58412e-06	2.43501e-05	1.9486	3.12271e-05	0.000406456	FALSE
804	Fracture of hand or wrist	injuries & poisonings	12	81	0.00546946	0.00319615	1.71518	0.081915	0.262998	1.9027	0.0407817	0.163735	FALSE
599.5	Frequency of urination and polyuria	genitourinary	90	579	0.041021	0.0228465	1.82953	1.72035e-07	2.92278e-06	1.87342	8.37189e-08	1.53548e-06	FALSE
612.1	Galactorrhea	genitourinary	12	44	0.00546946	0.00173618	3.16211	0.000420729	0.00383648	2.87463	0.0014531	0.0111152	FALSE
727.4	Ganglion and cyst of synovium, tendon, and bursa	musculoskeletal	14	95	0.00638104	0.00374857	1.70677	0.0626348	0.22515	1.62703	0.0936646	0.294688	FALSE
535.9	Gastritis and duodenitis, NOS	digestive	23	172	0.0104831	0.00678688	1.55039	0.049399	0.1876	1.737	0.0148036	0.07658	FALSE
300.11	Generalized anxiety disorder	mental disorders	81	457	0.0369189	0.0180326	2.08749	1.97738e-09	4.09165e-08	1.88385	3.5503e-07	5.80556e-06	FALSE
530.11	GERD	digestive	136	1576	0.0619872	0.0621868	0.996579	0.970376	0.977431	0.952971	0.604286	1	FALSE
365	Glaucoma	sense organs	11	55	0.00501367	0.00217022	2.31681	0.011148	0.059579	2.05237	0.0315409	0.135752	FALSE
242.1	Graves' disease	endocrine/metabolic	16	98	0.00729262	0.00386695	1.89239	0.0183991	0.0894461	1.66984	0.0599441	0.216443	FALSE
593.1	Gross hematuria	genitourinary	10	35	0.00455789	0.00138105	3.31083	0.000861034	0.00705436	3.54878	0.00056004	0.00507832	FALSE
735.3	Hallux valgus (Bunion)	musculoskeletal	11	55	0.00501367	0.00217022	2.31681	0.011148	0.059579	1.98876	0.0394972	0.161798	FALSE
389	Hearing loss	sense organs	11	127	0.00501367	0.00501125	1.00049	0.998767	0.998767	0.888213	0.70821	1	FALSE
530.9	Heartburn	digestive	28	157	0.0127621	0.006195	2.07376	0.000408698	0.00374795	1.96284	0.0012192	0.00959896	FALSE
228	Hemangioma and lymphangioma, any site	neoplasms	17	68	0.0077484	0.00268319	2.9025	8.98896e-05	0.0010217	2.47349	0.000973433	0.00777783	FALSE
228.1	Hemangioma of skin and subcutaneous tissue	neoplasms	15	74	0.00683683	0.00291994	2.35066	0.00262045	0.0191376	1.84288	0.0328693	0.140347	FALSE
578.1	Hematemesis	digestive	10	50	0.00455789	0.00197293	2.31621	0.0155348	0.0766766	3.22242	0.00100516	0.00799179	FALSE
593	Hematuria	genitourinary	47	392	0.0214221	0.0154678	1.39337	0.0334555	0.138454	1.47993	0.0128498	0.0679987	FALSE
636.3	Hemorrhage in early pregnancy	pregnancy complications	696	1743	0.317229	0.0687764	6.29089	2.37222e-272	1.27625e-269	7.00055	8.3694e-284	4.50274e-281	FALSE
578.8	Hemorrhage of rectum and anus	digestive	38	253	0.01732	0.00998303	1.74789	0.00145612	0.0114643	1.68777	0.00313704	0.0219185	FALSE
850	Hemorrhage or hematoma complicating a procedure	injuries & poisonings	11	44	0.00501367	0.00173618	2.89727	0.00163961	0.0126016	3.39301	0.000416487	0.0038856	FALSE
455	Hemorrhoids	circulatory system	68	585	0.0309936	0.0230833	1.35365	0.019941	0.0935605	1.18951	0.185579	0.475436	FALSE
573.3	Hepatomegaly	digestive	12	48	0.00546946	0.00189401	2.89814	0.00100526	0.00811241	3.02632	0.000786052	0.00657351	FALSE
54	Herpes simplex	infectious diseases	70	720	0.0319052	0.0284102	1.12707	0.347084	0.718198	1.0767	0.565843	0.999842	FALSE
53	Herpes zoster	infectious diseases	13	85	0.00592525	0.00335398	1.7712	0.0555943	0.207227	1.63098	0.104807	0.316777	FALSE
704.2	Hirsutism	dermatologic	20	94	0.00911577	0.00370911	2.47108	0.000253489	0.00246464	2.14213	0.00225571	0.0163261	FALSE
595	Hydronephrosis	genitourinary	14	249	0.00638104	0.0098252	0.647205	0.114363	0.335604	0.680723	0.16555	0.435176	FALSE
272.11	Hypercholesterolemia	endocrine/metabolic	15	99	0.00683683	0.0039064	1.75532	0.0429533	0.166859	1.4527	0.183243	0.470196	FALSE
643.1	Hyperemesis gravidarum	pregnancy complications	85	721	0.038742	0.0284497	1.37635	0.00628563	0.0375741	1.54633	0.000240172	0.00248485	FALSE
272.12	Hyperglyceridemia	endocrine/metabolic	19	49	0.00865998	0.00193347	4.50937	2.79094e-08	5.23789e-07	4.26054	1.58365e-07	2.84e-06	FALSE
705.8	Hyperhidrosis	dermatologic	23	114	0.0104831	0.00449828	2.34457	0.000207227	0.00213146	2.20913	0.000666783	0.00581723	FALSE
272.1	Hyperlipidemia	endocrine/metabolic	86	299	0.0391978	0.0117981	3.41712	5.38702e-23	2.80473e-21	2.91471	1.88341e-17	8.68522e-16	FALSE
642	Hypertension complicating pregnancy, childbirth, and the puerperium	pregnancy complications	120	2470	0.0546946	0.0974628	0.535795	8.94854e-11	1.92573e-09	0.556849	1.58045e-09	3.22892e-08	FALSE
623	Hypertrophy of female genital organs	genitourinary	18	135	0.00820419	0.00532691	1.54461	0.0843751	0.264086	1.40362	0.181357	0.466843	FALSE
251.1	Hypoglycemia	endocrine/metabolic	14	43	0.00638104	0.00169672	3.77854	1.64144e-05	0.000228387	3.94575	1.46644e-05	0.00020058	FALSE
276.14	Hypopotassemia	endocrine/metabolic	42	253	0.0191431	0.00998303	1.93547	8.57619e-05	0.000984143	2.42646	2.42594e-07	4.21017e-06	FALSE
276.12	Hyposmolality and/or hyponatremia	endocrine/metabolic	15	117	0.00683683	0.00461666	1.48421	0.151253	0.405288	1.63773	0.0763578	0.255688	FALSE
458.9	Hypotension NOS	circulatory system	14	173	0.00638104	0.00682634	0.934348	0.80754	0.970648	1.01488	0.958082	1	FALSE
780	Hypothermia/Chills	symptoms	25	119	0.0113947	0.00469558	2.44313	5.35895e-05	0.000670492	3.07955	6.69748e-07	1.07027e-05	FALSE
244.4	Hypothyroidism NOS	endocrine/metabolic	322	1553	0.146764	0.0612792	2.63495	4.07257e-49	3.65174e-47	2.21735	1.95164e-32	1.25998e-30	FALSE
276.5	Hypovolemia	endocrine/metabolic	48	390	0.0218778	0.0153889	1.4311	0.0204274	0.0939719	1.74931	0.000375093	0.00361199	FALSE
380.4	Impacted cerumen	sense organs	21	190	0.00957156	0.00749714	1.27937	0.286283	0.626098	1.20197	0.42934	0.840964	FALSE
250.41	Impaired fasting glucose	endocrine/metabolic	50	334	0.0227894	0.0131792	1.7462	0.000276545	0.00267271	1.5301	0.00588388	0.0366663	FALSE
647.1	Infections of genitourinary tract during pregnancy	pregnancy complications	130	1376	0.0592525	0.0542951	1.09706	0.327386	0.705475	1.43071	0.000212629	0.00228789	FALSE
647	Infectious and parasitic complications affecting pregnancy	pregnancy complications	125	2336	0.0569736	0.0921754	0.595027	4.10415e-08	7.61391e-07	0.636422	2.13869e-06	3.19615e-05	FALSE
626.8	Infertility, female	genitourinary	630	652	0.287147	0.025727	15.2544	0	0	13.2227	0	0	FALSE
626.15	Infertility, female, associated with anovulation	genitourinary	106	148	0.0483136	0.00583988	8.64227	1.71015e-62	1.84012e-60	7.1644	9.4519e-51	9.5346e-49	FALSE
609.1	Infertility, male	genitourinary	17	14	0.0077484	0.000552421	14.128	2.41499e-13	6.72033e-12	11.7998	1.40131e-11	3.59003e-10	FALSE
371.3	Inflammation of eyelids	sense organs	29	196	0.0132179	0.00773389	1.71858	0.00683917	0.0401397	1.63533	0.0151467	0.0781048	FALSE
357	Inflammatory and toxic neuropathy	neurological	10	40	0.00455789	0.00157835	2.89641	0.00268228	0.0194134	2.79941	0.00409081	0.0272833	FALSE
613.1	Inflammatory disease of breast	genitourinary	14	243	0.00638104	0.00958845	0.663344	0.136614	0.382139	0.615831	0.0804706	0.265602	FALSE
614.4	Inflammatory diseases of uterus, except cervix	genitourinary	107	127	0.0487694	0.00501125	10.1797	5.60391e-68	7.53725e-66	10.305	1.16008e-64	1.5603e-62	FALSE
481	Influenza	respiratory	20	228	0.00911577	0.00899657	1.01337	0.954785	0.974743	1.129	0.607984	1	FALSE
1009	Injury, NOS	NULL	105	966	0.0478578	0.038117	1.26839	0.0238959	0.106541	1.43186	0.000771085	0.00648193	FALSE
327.4	Insomnia	neurological	63	393	0.0287147	0.0155072	1.87687	4.72894e-06	7.0023e-05	1.66992	0.000226538	0.00237424	FALSE
835	Internal derangement of knee	injuries & poisonings	17	94	0.0077484	0.00370911	2.09752	0.00510102	0.0321603	1.94235	0.0128	0.067958	FALSE
271.3	Intestinal disaccharidase deficiencies and disaccharide malabsorption	endocrine/metabolic	47	318	0.0214221	0.0125478	1.72271	0.000571142	0.00492954	1.50872	0.00991346	0.0557503	FALSE
8	Intestinal infection	infectious diseases	23	119	0.0104831	0.00469558	2.24561	0.000408314	0.00374795	2.16205	0.000859002	0.00703772	FALSE
557	Intestinal malabsorption (non-celiac)	digestive	11	43	0.00501367	0.00169672	2.96477	0.00132962	0.0106238	2.59065	0.00533447	0.034166	FALSE
280.2	Iron deficiency anemia secondary to blood loss (chronic)	hematopoietic	26	119	0.0118505	0.00469558	2.54203	1.81272e-05	0.000250062	2.56767	2.0054e-05	0.000269726	FALSE
280.1	Iron deficiency anemias, unspecified or not due to blood loss	hematopoietic	104	890	0.047402	0.0351182	1.36719	0.0032023	0.0221824	1.3899	0.00214678	0.0156783	FALSE
626.14	Irregular menstrual bleeding	genitourinary	94	311	0.0428441	0.0122716	3.60283	1.10728e-26	6.38267e-25	3.54636	2.79256e-25	1.5024e-23	FALSE
626.13	Irregular menstrual cycle	genitourinary	485	1334	0.221057	0.0526378	5.10761	3.21451e-170	1.03765e-167	4.65978	2.83225e-146	9.14251e-144	FALSE
626.1	Irregular menstrual cycle/bleeding	genitourinary	67	187	0.0305378	0.00737876	4.23748	1.29326e-23	6.95775e-22	4.29657	2.94553e-23	1.48565e-21	FALSE
564.1	Irritable Bowel Syndrome	digestive	46	202	0.0209663	0.00797064	2.66535	2.76938e-09	5.51825e-08	2.35261	2.84e-07	4.82501e-06	FALSE
741.4	Joint effusions	musculoskeletal	20	147	0.00911577	0.00580042	1.57683	0.0571073	0.211796	1.56377	0.0648871	0.228165	FALSE
840.3	Joint/ligament sprain	injuries & poisonings	32	238	0.0145852	0.00939115	1.56127	0.0187995	0.0898216	1.54875	0.0223921	0.105076	FALSE
655	Known or suspected fetal abnormality affecting management of mother	pregnancy complications	748	10686	0.34093	0.421655	0.709518	2.25627e-13	6.38881e-12	0.728042	1.91499e-11	4.82935e-10	FALSE
737.3	Kyphoscoliosis and scoliosis	musculoskeletal	15	217	0.00683683	0.00856252	0.797072	0.397214	0.795415	0.807802	0.428494	0.840327	FALSE
645	Late pregnancy and failed induction	pregnancy complications	89	5362	0.0405652	0.211577	0.157554	3.76291e-64	4.3381e-62	0.163926	3.45031e-61	3.97771e-59	FALSE
277.51	Lipoprotein disorders	endocrine/metabolic	14	49	0.00638104	0.00193347	3.31507	8.01017e-05	0.000936842	3.00115	0.000356345	0.0034857	FALSE
687.2	Localized superficial swelling, mass, or lump	dermatologic	27	264	0.0123063	0.0104171	1.18362	0.406969	0.810924	1.10647	0.62159	1	FALSE
611.3	Lump or mass in breast	genitourinary	101	686	0.0460346	0.0270686	1.73448	4.34512e-07	7.01302e-06	1.51974	0.0001432	0.00159157	FALSE
289.4	Lymphadenitis	hematopoietic	45	315	0.0205105	0.0124295	1.66376	0.00156069	0.0121689	1.67622	0.00148554	0.0112369	FALSE
296.22	Major depressive disorder	mental disorders	160	1060	0.0729262	0.0418261	1.80204	2.08434e-11	5.09715e-10	1.80787	3.51583e-11	8.59781e-10	FALSE
647.3	Major puerperal infection	pregnancy complications	15	200	0.00683683	0.00789173	0.865408	0.590506	0.970648	0.998254	0.994856	1	FALSE
798	Malaise and fatigue	symptoms	186	1080	0.0847767	0.0426153	2.08099	7.9982e-19	3.48894e-17	1.99293	1.94161e-16	8.4696e-15	FALSE
652	Malposition and malpresentation of fetus or obstruction	pregnancy complications	224	4116	0.102097	0.162412	0.586401	1.86212e-13	5.46446e-12	0.571344	1.72058e-14	5.90854e-13	FALSE
613.5	Mastodynia	genitourinary	65	573	0.0296263	0.0226098	1.3198	0.0366865	0.148962	1.24975	0.096057	0.299876	FALSE
658	Maternal complication of pregnancy affecting fetus or newborn	pregnancy complications	37	733	0.0168642	0.0289232	0.575916	0.00116907	0.00938748	0.603081	0.00309204	0.021698	FALSE
857	Mechanical complication of unspecified genitourinary device, implant, and graft	injuries & poisonings	20	175	0.00911577	0.00690526	1.32306	0.2377	0.560998	1.30651	0.26329	0.608811	FALSE
306.1	Mental disorders durring/after pregnancy	mental disorders	134	1964	0.0610757	0.0774967	0.774323	0.0055341	0.034354	0.757914	0.00290851	0.0204993	FALSE
593.2	Microscopic hematuria	genitourinary	14	69	0.00638104	0.00272265	2.35232	0.00361652	0.0241201	2.32775	0.00454488	0.0298188	FALSE
340.1	Migrain with aura	neurological	36	222	0.0164084	0.00875982	1.88771	0.000449818	0.00402136	1.87459	0.000606346	0.00534777	FALSE
340	Migraine	neurological	161	1051	0.073382	0.041471	1.83041	5.52798e-12	1.39409e-10	1.77527	1.11772e-10	2.57713e-09	FALSE
262	Mineral deficiency NEC	endocrine/metabolic	14	64	0.00638104	0.00252535	2.5366	0.00165619	0.0126687	2.32929	0.00460264	0.0300756	FALSE
634	Miscarriage; stillbirth	pregnancy complications	1418	27	0.646308	0.00106538	1713.35	0	0	2022.13	0	0	FALSE
272.13	Mixed hyperlipidemia	endocrine/metabolic	12	39	0.00546946	0.00153889	3.56822	0.000120721	0.00134375	3.11042	0.000685166	0.00591178	FALSE
296	Mood disorders	mental disorders	15	90	0.00683683	0.00355128	1.93154	0.0186227	0.0897181	2.04047	0.0120053	0.0652409	FALSE
278.11	Morbid obesity	endocrine/metabolic	57	475	0.0259799	0.0187428	1.39642	0.0186774	0.0897181	1.5231	0.00362915	0.024715	FALSE
622.2	Mucous polyp of cervix	genitourinary	14	87	0.00638104	0.0034329	1.8643	0.0310359	0.130109	1.54928	0.132174	0.372387	FALSE
651	Multiple gestation	pregnancy complications	80	417	0.0364631	0.0164542	2.26205	4.85577e-11	1.15253e-09	2.26313	9.08558e-11	2.12524e-09	FALSE
772.3	Muscle weakness	symptoms	12	103	0.00546946	0.00406424	1.34765	0.329287	0.708625	1.42781	0.251445	0.592455	FALSE
770	Myalgia and myositis unspecified	symptoms	43	322	0.0195989	0.0127057	1.55338	0.0072088	0.0420036	1.66431	0.00221781	0.0161241	FALSE
200	Myeloproliferative disease	neoplasms	10	49	0.00455789	0.00193347	2.36357	0.0133688	0.068499	2.46197	0.0104781	0.0581155	FALSE
367.1	Myopia	sense organs	58	478	0.0264357	0.0188612	1.4125	0.0142156	0.0716999	1.20188	0.195139	0.489819	FALSE
789	Nausea and vomiting	symptoms	266	2367	0.12124	0.0933986	1.33922	2.22865e-05	0.000302273	1.56138	2.27949e-10	5.03986e-09	FALSE
199	Neoplasm of uncertain behavior	neoplasms	19	154	0.00865998	0.00607663	1.42884	0.143885	0.399021	1.25652	0.353628	0.742205	FALSE
173	Neoplasm of uncertain behavior of skin	neoplasms	27	318	0.0123063	0.0125478	0.98051	0.922262	0.970648	0.801846	0.277564	0.63097	FALSE
217.1	Nevus, non-neoplastic	neoplasms	27	252	0.0123063	0.00994357	1.24057	0.289999	0.633368	0.993251	0.973706	1	FALSE
558	Noninfectious gastroenteritis	digestive	48	351	0.0218778	0.01385	1.5926	0.00276974	0.0198683	1.70214	0.000744781	0.00632672	FALSE
619.3	Noninflammatory disorders of cervix	genitourinary	86	389	0.0391978	0.0153494	2.61709	2.16627e-15	7.13543e-14	2.48497	1.32922e-13	4.12571e-12	FALSE
619.1	Noninflammatory disorders of ovary, fallopian tube, and broad ligament	genitourinary	64	250	0.0291705	0.00986466	3.01587	7.2759e-15	2.34866e-13	2.92207	9.5391e-14	3.07922e-12	FALSE
619.4	Noninflammatory disorders of vagina	genitourinary	246	1398	0.112124	0.0551632	2.16299	4.47231e-26	2.48907e-24	2.24406	1.28307e-27	7.39599e-26	FALSE
619.5	Noninflammatory disorders of vulva and perineum	genitourinary	16	203	0.00729262	0.0080101	0.909769	0.716727	0.970648	0.832712	0.484711	0.907568	FALSE
619	Noninflammatory female genital disorders	genitourinary	58	223	0.0264357	0.00879927	3.05873	6.48743e-14	1.97561e-12	2.98655	4.6463e-13	1.36348e-11	FALSE
395.1	Nonrheumatic mitral valve disorders	circulatory system	13	96	0.00592525	0.00378803	1.56757	0.129331	0.368798	1.42773	0.232817	0.561684	FALSE
579.8	Nonspecific abnormal findings in stool contents	digestive	12	71	0.00546946	0.00280156	1.95753	0.0318305	0.13275	1.76083	0.0731853	0.246599	FALSE
793.2	Nonspecific abnormal findings on radiological and other examination of other intrathoracic organs (echocardiogram, etc)	symptoms	19	140	0.00865998	0.00552421	1.5726	0.0651741	0.232723	1.53802	0.0820618	0.269751	FALSE
418	Nonspecific chest pain	circulatory system	148	1164	0.0674567	0.0459298	1.50259	6.43484e-06	9.40378e-05	1.77935	4.01676e-10	8.53034e-09	FALSE
573.6	Nonspecific elevation of levels of transaminase or lactic acid dehydrogenase [LDH]	digestive	19	142	0.00865998	0.00560313	1.55033	0.0738641	0.251108	1.55162	0.0760651	0.255237	FALSE
241.2	Nontoxic multinodular goiter	endocrine/metabolic	14	76	0.00638104	0.00299886	2.13507	0.00931337	0.0521937	1.85999	0.0344629	0.14523	FALSE
241	Nontoxic nodular goiter	endocrine/metabolic	14	70	0.00638104	0.0027621	2.31862	0.00418117	0.0268861	1.99139	0.0205085	0.0985142	FALSE
241.1	Nontoxic uninodular goiter	endocrine/metabolic	30	165	0.0136737	0.00651067	2.11544	0.000175982	0.00186865	1.77151	0.00451461	0.0297411	FALSE
650	Normal delivery	pregnancy complications	95	5084	0.0432999	0.200608	0.180353	1.1105e-58	1.12022e-56	0.173973	2.83798e-60	3.05366e-58	FALSE
278.1	Obesity	endocrine/metabolic	192	1461	0.0875114	0.0576491	1.56768	2.08226e-08	4.00091e-07	1.8032	8.5003e-13	2.40693e-11	FALSE
665	Obstetrical/birth trauma	pregnancy complications	203	12115	0.0925251	0.478041	0.111326	1.07731e-189	4.34697e-187	0.10858	1.58178e-190	6.38248e-188	FALSE
575.2	Obstruction of bile duct	digestive	15	459	0.00683683	0.0181115	0.373201	0.000179078	0.0018891	0.429058	0.00138632	0.0107573	FALSE
327.32	Obstructive sleep apnea	neurological	29	159	0.0132179	0.00627392	2.12162	0.000213555	0.00216779	2.01848	0.000638069	0.00559698	FALSE
871.2	Open wound of finger(s)	injuries & poisonings	15	137	0.00683683	0.00540583	1.26654	0.386551	0.783786	1.25295	0.411753	0.818435	FALSE
870	Open wounds of head; neck; and trunk	injuries & poisonings	11	66	0.00501367	0.00260427	1.92984	0.0440095	0.168321	2.42452	0.00760052	0.0452666	FALSE
458.1	Orthostatic hypotension	circulatory system	10	72	0.00455789	0.00284102	1.60708	0.160697	0.421732	1.72873	0.110397	0.326936	FALSE
743.9	Osteopenia or other disorder of bone and cartilage	musculoskeletal	13	80	0.00592525	0.00315669	1.88227	0.0349281	0.143613	1.6741	0.0885325	0.284506	FALSE
382	Otalgia	sense organs	46	380	0.0209663	0.0149943	1.40681	0.0304562	0.12812	1.55385	0.00585852	0.0366663	FALSE
790.6	Other abnormal blood chemistry	symptoms	114	542	0.0519599	0.0213866	2.50791	2.98285e-18	1.26692e-16	2.32773	2.62729e-15	1.03425e-13	FALSE
250.42	Other abnormal glucose	endocrine/metabolic	93	431	0.0423883	0.0170067	2.55852	7.70525e-16	2.70354e-14	2.401	1.2625e-13	3.99544e-12	FALSE
599.9	Other abnormality of urination	genitourinary	37	213	0.0168642	0.00840469	2.02379	8.59753e-05	0.000984143	1.93048	0.000294099	0.00298538	FALSE
795	Other and nonspecific abnormal cytological, histological and immunological findings	symptoms	16	188	0.00729262	0.00741822	0.982944	0.947522	0.970648	0.882748	0.635089	1	FALSE
286.7	Other and unspecified coagulation defects	hematopoietic	21	64	0.00957156	0.00252535	3.81715	1.12373e-07	1.92946e-06	3.71994	3.04745e-07	5.12352e-06	FALSE
654	Other and unspecified complications of birth; puerperium affecting management of mother	pregnancy complications	23	224	0.0104831	0.00883873	1.18802	0.433765	0.849632	1.22171	0.367384	0.758259	FALSE
759	Other and unspecified congenital anomalies	congenital anomalies	63	786	0.0287147	0.0310145	0.923655	0.550049	0.970648	1.02845	0.834247	1	FALSE
285	Other anemias	hematopoietic	162	2193	0.0738377	0.0865328	0.841596	0.0416014	0.1662	0.850414	0.0581718	0.212524	FALSE
215	Other benign neoplasm of connective and other soft tissue	neoplasms	32	182	0.0145852	0.00718147	2.04621	0.000207336	0.00213146	1.59281	0.0167822	0.0845908	FALSE
571.5	Other chronic nonalcoholic liver disease	digestive	39	293	0.0177758	0.0115614	1.54724	0.011125	0.059579	1.69224	0.00250594	0.017976	FALSE
646	Other complications of pregnancy NEC	pregnancy complications	561	8213	0.255697	0.324074	0.716526	5.06629e-11	1.18507e-09	0.79172	5.70206e-06	8.14436e-05	FALSE
674	Other complications of the puerperium NEC	pregnancy complications	61	1142	0.0278031	0.0450618	0.606047	0.000172652	0.00186149	0.621194	0.000382289	0.0036295	FALSE
348.9	Other conditions of brain, NOS	neurological	10	54	0.00455789	0.00213077	2.1443	0.0270265	0.116946	2.09321	0.0346657	0.145704	FALSE
649	Other conditions or status of the mother complicating pregnancy, childbirth, or the puerperium	pregnancy complications	565	10580	0.257521	0.417472	0.483968	6.57859e-47	5.58834e-45	0.487887	6.61368e-45	5.93027e-43	FALSE
742.9	Other derangement of joint	musculoskeletal	21	181	0.00957156	0.00714201	1.34346	0.20239	0.505662	1.14203	0.569202	1	FALSE
289	Other diseases of blood and blood-forming organs	hematopoietic	12	79	0.00546946	0.00311723	1.75874	0.0691249	0.240967	1.69143	0.0936087	0.294688	FALSE
525	Other diseases of the teeth and supporting structures	digestive	19	126	0.00865998	0.00497179	1.74831	0.0237813	0.106324	2.38603	0.000560063	0.00507832	FALSE
575.8	Other disorders of biliary tract	digestive	10	97	0.00455789	0.00382749	1.1917	0.598281	0.970648	1.394	0.324567	0.698468	FALSE
733	Other disorders of bone and cartilage	musculoskeletal	15	108	0.00683683	0.00426153	1.60847	0.0855698	0.265086	1.58778	0.098765	0.304793	FALSE
388	Other disorders of ear	sense organs	11	90	0.00501367	0.00355128	1.41387	0.279403	0.617336	1.23252	0.516752	0.946054	FALSE
374	Other disorders of eyelids	sense organs	15	76	0.00683683	0.00299886	2.28862	0.00348515	0.0238177	2.21244	0.00569015	0.0360153	FALSE
573	Other disorders of liver	digestive	17	147	0.0077484	0.00580042	1.33846	0.256938	0.58081	1.33959	0.259985	0.605505	FALSE
277	Other disorders of metabolism	endocrine/metabolic	13	75	0.00592525	0.0029594	2.00816	0.0206472	0.0946721	2.01481	0.0226648	0.106032	FALSE
729	Other disorders of soft tissues	musculoskeletal	27	216	0.0123063	0.00852306	1.44941	0.0706915	0.245368	1.39238	0.10993	0.3266	FALSE
676	Other disorders of the breast associated with childbirth and disorders of lactation	pregnancy complications	35	595	0.0159526	0.0234779	0.674277	0.0246186	0.108862	0.591088	0.00283199	0.0200475	FALSE
586	Other disorders of the kidney and ureters	genitourinary	26	311	0.0118505	0.0122716	0.965271	0.863352	0.970648	1.02789	0.894397	1	FALSE
246	Other disorders of thyroid	endocrine/metabolic	70	344	0.0319052	0.0135738	2.39501	5.23343e-11	1.20668e-09	1.98178	3.56103e-07	5.80556e-06	FALSE
694.2	Other dyschromia	dermatologic	79	476	0.0360073	0.0187823	1.95134	6.3175e-08	1.13294e-06	1.64678	6.69722e-05	0.000794803	FALSE
512.9	Other dyspnea	respiratory	42	298	0.0191431	0.0117587	1.64026	0.00293082	0.0207472	1.69368	0.00174314	0.0128467	FALSE
259	Other endocrine disorders	endocrine/metabolic	24	57	0.0109389	0.00224914	4.90633	7.56546e-11	1.65009e-09	4.59678	9.32322e-10	1.95424e-08	FALSE
414	Other forms of chronic heart disease	circulatory system	10	131	0.00455789	0.00516908	0.881218	0.700576	0.970648	0.897265	0.743118	1	FALSE
339	Other headache syndromes	neurological	195	1732	0.0888788	0.0683423	1.32981	0.000311023	0.00297036	1.60031	6.10576e-09	1.18731e-07	FALSE
282.8	Other hemoglobinopathies	hematopoietic	24	286	0.0109389	0.0112852	0.968979	0.882765	0.970648	0.827245	0.378136	0.769624	FALSE
638	Other high-risk pregnancy	pregnancy complications	1051	7608	0.479034	0.300201	2.14347	1.00327e-64	1.2456e-62	2.16044	1.38123e-64	1.71485e-62	FALSE
401.3	Other hypertensive complications	circulatory system	15	104	0.00683683	0.0041037	1.6706	0.0640221	0.229117	1.56061	0.111727	0.329064	FALSE
701	Other hypertrophic and atrophic conditions of skin	dermatologic	31	293	0.0141294	0.0115614	1.22531	0.285363	0.625782	1.04378	0.822926	1	FALSE
1019	Other ill-defined and unknown causes of morbidity and mortality	NULL	968	12265	0.441203	0.48396	0.841896	0.000122139	0.00135022	0.855036	0.000569718	0.00510847	FALSE
279.7	Other immunological findings	endocrine/metabolic	28	59	0.0127621	0.00232806	5.53979	1.13002e-13	3.37751e-12	5.23651	1.99596e-12	5.46012e-11	FALSE
136	Other infectious and parasitic diseases	infectious diseases	10	45	0.00455789	0.00177564	2.57407	0.00695521	0.0406728	2.43656	0.0121566	0.0656215	FALSE
686	Other local infections of skin and subcutaneous tissue	dermatologic	18	103	0.00820419	0.00406424	2.02706	0.00586351	0.0357121	1.94098	0.0105961	0.058569	FALSE
598.9	Other nonspecific findings on examination of urine	genitourinary	72	700	0.0328168	0.027621	1.19449	0.157787	0.415446	1.27448	0.0567446	0.210059	FALSE
656	Other perinatal conditions of fetus or newborn	pregnancy complications	514	7027	0.234275	0.277276	0.79747	1.5233e-05	0.000213791	0.828725	0.000375969	0.00361199	FALSE
351	Other peripheral nerve disorders	neurological	33	321	0.015041	0.0126662	1.19035	0.344094	0.714759	1.03601	0.848512	1	FALSE
362	Other retinal disorders	sense organs	11	74	0.00501367	0.00291994	1.72066	0.0938419	0.286315	1.62198	0.138927	0.383218	FALSE
613.7	Other signs and symptoms in breast	genitourinary	20	134	0.00911577	0.00528746	1.7307	0.0227048	0.102362	1.60821	0.0504311	0.193339	FALSE
427.3	Other specified cardiac dysrhythmias	circulatory system	54	396	0.0246126	0.0156256	1.58966	0.00159177	0.0123515	1.76283	0.000141582	0.00159157	FALSE
704.8	Other specified diseases of hair and hair follicles	dermatologic	24	116	0.0109389	0.0045772	2.40524	9.84361e-05	0.00111102	2.38438	0.00014364	0.00159157	FALSE
706.8	Other specified diseases of sebaceous glands	dermatologic	17	95	0.0077484	0.00374857	2.07536	0.00573362	0.0351866	1.79796	0.0277896	0.122883	FALSE
1005	Other symptoms	NULL	42	241	0.0191431	0.00950953	2.03282	2.61133e-05	0.000339894	2.14758	7.94559e-06	0.000112493	FALSE
579	Other symptoms involving abdomen and pelvis	digestive	18	108	0.00820419	0.00426153	1.93283	0.00992223	0.0542864	1.80779	0.0218783	0.103858	FALSE
599.8	Other symptoms involving urinary system	genitourinary	44	202	0.0200547	0.00797064	2.5471	2.5579e-08	4.85699e-07	2.38258	3.22063e-07	5.35886e-06	FALSE
724.8	Other symptoms referable to back	musculoskeletal	10	49	0.00455789	0.00193347	2.36357	0.0133688	0.068499	2.12724	0.0317291	0.136199	FALSE
599	Other symptoms/disorders or the urinary system	genitourinary	27	69	0.0123063	0.00272265	4.56383	2.82123e-11	6.79623e-10	4.42897	1.52164e-10	3.45906e-09	FALSE
1010	Other tests	NULL	297	5328	0.135369	0.210236	0.58814	1.48348e-16	5.44167e-15	0.5948	1.05961e-15	4.50054e-14	FALSE
479	Other upper respiratory disease	respiratory	76	602	0.0346399	0.0237541	1.47472	0.001705	0.0129805	1.58626	0.000239077	0.00248485	FALSE
452	Other venous embolism and thrombosis	circulatory system	11	41	0.00501367	0.0016178	3.10964	0.000856235	0.00705083	3.426	0.000385066	0.00363448	FALSE
380.1	Otitis externa	sense organs	14	163	0.00638104	0.00643176	0.992064	0.977249	0.980286	1.01044	0.970595	1	FALSE
381.1	Otitis media	sense organs	13	112	0.00592525	0.00441937	1.34278	0.315852	0.681531	1.36094	0.298397	0.663378	FALSE
628	Ovarian cyst	genitourinary	325	1261	0.148131	0.0497573	3.32087	1.97649e-72	2.90005e-70	3.2752	1.37282e-68	2.21572e-66	FALSE
256	Ovarian dysfunction	endocrine/metabolic	27	38	0.0123063	0.00149943	8.29712	5.59633e-17	2.20304e-15	6.39152	3.8557e-13	1.15243e-11	FALSE
625	Pain and other symptoms associated with female genital organs	genitourinary	164	843	0.0747493	0.0332636	2.34794	4.7392e-22	2.3179e-20	2.48854	4.37679e-24	2.27875e-22	FALSE
745	Pain in joint	musculoskeletal	228	1737	0.10392	0.0685396	1.57606	8.94239e-10	1.87442e-08	1.50012	7.14957e-08	1.32637e-06	FALSE
773	Pain in limb	symptoms	148	1108	0.0674567	0.0437202	1.58219	3.97744e-07	6.48444e-06	1.6018	2.83249e-07	4.82501e-06	FALSE
379.9	Pain, swelling or discharge of eye	sense organs	25	150	0.0113947	0.00591879	1.93584	0.00235454	0.0172737	2.14481	0.000547849	0.00502402	FALSE
512.2	Painful respiration	respiratory	25	227	0.0113947	0.00895711	1.27528	0.251181	0.575043	1.43256	0.0940935	0.295461	FALSE
427.9	Palpitations	circulatory system	94	665	0.0428441	0.02624	1.6611	6.46728e-06	9.40378e-05	1.63628	1.49381e-05	0.000202606	FALSE
792.1	Papanicolaou smear of cervix or vagina with atypical squamous cells	genitourinary	73	649	0.0332726	0.0256086	1.30957	0.0316409	0.132302	1.27922	0.051925	0.197658	FALSE
427.11	Paroxysmal supraventricular tachycardia	circulatory system	16	130	0.00729262	0.00512962	1.42477	0.183036	0.467438	1.48774	0.139611	0.383218	FALSE
614.33	Pelvic inflammatory disease, NOS	genitourinary	24	57	0.0109389	0.00224914	4.90633	7.56546e-11	1.65009e-09	7.39857	4.27722e-15	1.59992e-13	FALSE
614.1	Pelvic peritoneal adhesions, female (postoperative) (postinfection)	genitourinary	18	184	0.00820419	0.00726039	1.13107	0.619412	0.970648	1.08709	0.738449	1	FALSE
726	Peripheral enthesopathies and allied syndromes	musculoskeletal	11	67	0.00501367	0.00264373	1.90096	0.0488495	0.185951	1.62611	0.137969	0.381304	FALSE
386.2	Peripheral or central vertigo	sense organs	15	108	0.00683683	0.00426153	1.60847	0.0855698	0.265086	1.43947	0.190361	0.483086	FALSE
253.1	Pituitary hyperfunction	endocrine/metabolic	28	76	0.0127621	0.00299886	4.29774	5.3086e-11	1.20677e-09	3.62106	9.10088e-09	1.7281e-07	FALSE
635.3	Placenta previa and abruptio placenta	pregnancy complications	96	1997	0.0437557	0.0787989	0.534934	4.901e-09	9.64661e-08	0.572464	2.16048e-07	3.79023e-06	FALSE
507	Pleurisy; pleural effusion	respiratory	16	125	0.00729262	0.00493233	1.48205	0.139806	0.389046	1.55058	0.103926	0.315887	FALSE
480	Pneumonia	respiratory	21	120	0.00957156	0.00473504	2.0313	0.00285724	0.0203193	2.15027	0.00155526	0.0116213	FALSE
256.4	Polycystic ovaries	endocrine/metabolic	225	588	0.102552	0.0232017	4.81086	3.64675e-82	8.40836e-80	4.24393	1.0793e-67	1.58362e-65	FALSE
622.1	Polyp of corpus uteri	genitourinary	90	105	0.041021	0.00414316	10.2816	8.69481e-58	8.25495e-56	8.30468	1.08089e-46	1.02621e-44	FALSE
475.9	Postnasal drip	respiratory	11	88	0.00501367	0.00347236	1.44612	0.249864	0.574475	1.26548	0.466704	0.884109	FALSE
300.9	Posttraumatic stress disorder	mental disorders	23	119	0.0104831	0.00469558	2.24561	0.000408314	0.00374795	2.6031	4.25785e-05	0.000536888	FALSE
418.1	Precordial pain	circulatory system	15	61	0.00683683	0.00240698	2.85309	0.000286871	0.00275601	3.47434	2.30083e-05	0.000306905	FALSE
642.1	Preeclampsia and eclampsia	pregnancy complications	68	2095	0.0309936	0.0826658	0.354934	1.36585e-16	5.12671e-15	0.393866	1.38741e-13	4.22504e-12	FALSE
427.6	Premature beats	circulatory system	11	104	0.00501367	0.0041037	1.22286	0.526729	0.970648	1.12721	0.708006	1	FALSE
627.5	Premature menopause and other ovarian failure	genitourinary	19	28	0.00865998	0.00110484	7.89795	4.11125e-12	1.05326e-10	6.04025	2.18905e-09	4.36189e-08	FALSE
286.81	Primary hypercoagulable state	hematopoietic	86	150	0.0391978	0.00591879	6.85199	9.80416e-45	7.5352e-43	6.23239	3.60271e-39	2.76894e-37	FALSE
653	Problems associated with amniotic cavity and membranes	pregnancy complications	192	5018	0.0875114	0.198003	0.388452	1.63596e-34	1.05617e-32	0.420795	7.99784e-29	4.78093e-27	FALSE
269	Proteinuria	endocrine/metabolic	16	139	0.00729262	0.00548475	1.33204	0.279176	0.617336	1.46438	0.154169	0.410814	FALSE
695.7	Prurigo and Lichen	dermatologic	10	73	0.00455789	0.00288048	1.585	0.172894	0.449356	1.35414	0.373542	0.765968	FALSE
698	Pruritus and related conditions	dermatologic	103	887	0.0469462	0.0349998	1.35814	0.0040699	0.0267025	1.30028	0.0145881	0.0757078	FALSE
696.41	Psoriasis vulgaris	dermatologic	22	110	0.0100273	0.00434045	2.32348	0.000326439	0.00309925	2.03994	0.00256658	0.0183294	FALSE
303.3	Psychogenic disorder	mental disorders	10	38	0.00455789	0.00149943	3.04909	0.00174433	0.0132176	3.40164	0.000751006	0.0063462	FALSE
590	Pyelonephritis	genitourinary	53	341	0.0241568	0.0134554	1.81501	6.57803e-05	0.000810454	2.66676	1.68385e-10	3.77463e-09	FALSE
687.1	Rash and other nonspecific skin eruption	dermatologic	115	1001	0.0524157	0.0394981	1.34513	0.00335359	0.0230328	1.34191	0.00396949	0.026749	FALSE
443.1	Raynaud's syndrome	circulatory system	11	61	0.00501367	0.00240698	2.08843	0.0249025	0.109816	1.84252	0.0645149	0.227352	FALSE
530.14	Reflux esophagitis	digestive	12	43	0.00546946	0.00169672	3.23578	0.00033273	0.0031405	3.00386	0.000889613	0.00721525	FALSE
594.8	Renal colic	genitourinary	15	72	0.00683683	0.00284102	2.41615	0.00194427	0.0145804	2.83138	0.000326097	0.0032499	FALSE
599.2	Retention of urine	genitourinary	12	473	0.00546946	0.0186639	0.289162	2.3125e-05	0.000311031	0.296015	3.44827e-05	0.00044524	FALSE
654.2	Rhesus isoimmunization in pregnancy	pregnancy complications	47	346	0.0214221	0.0136527	1.58153	0.00351936	0.0238666	1.49035	0.0123259	0.0660931	FALSE
695.3	Rosacea	dermatologic	14	110	0.00638104	0.00434045	1.47315	0.173497	0.4502	1.15201	0.621104	1	FALSE
701.2	Scar conditions and fibrosis of skin	dermatologic	28	178	0.0127621	0.00702364	1.82758	0.00319685	0.0221824	1.63914	0.0167492	0.0845908	FALSE
764	Sciatica	symptoms	35	374	0.0159526	0.0147575	1.08229	0.657165	0.970648	0.983073	0.924224	1	FALSE
706.2	Sebaceous cyst	dermatologic	26	234	0.0118505	0.00923332	1.28685	0.225178	0.550662	1.08895	0.684059	1	FALSE
690.1	Seborrheic dermatitis	dermatologic	35	217	0.0159526	0.00856252	1.87706	0.000601088	0.00516041	1.58968	0.01224	0.0658511	FALSE
702.2	Seborrheic keratosis	dermatologic	27	196	0.0123063	0.00773389	1.59858	0.0230983	0.103846	1.22148	0.336409	0.715369	FALSE
244.1	Secondary hypothyroidism	endocrine/metabolic	15	94	0.00683683	0.00370911	1.84906	0.0275475	0.118882	1.60412	0.091974	0.291643	FALSE
287.32	Secondary thrombocytopenia	hematopoietic	12	352	0.00546946	0.0138894	0.390452	0.00138809	0.0109823	0.389989	0.00142627	0.0110143	FALSE
994.2	Sepsis	injuries & poisonings	13	99	0.00592525	0.0039064	1.51988	0.15705	0.414181	1.84317	0.0412589	0.165108	FALSE
470	Septal Deviations/Turbinate Hypertrophy	respiratory	17	107	0.0077484	0.00422207	1.84174	0.0197779	0.0930656	1.61164	0.0711484	0.241945	FALSE
38	Septicemia	infectious diseases	10	89	0.00455789	0.00351182	1.29923	0.433547	0.849632	1.58148	0.175379	0.455084	FALSE
637	Short gestation; low birth weight; and fetal growth retardation	pregnancy complications	24	466	0.0109389	0.0183877	0.590423	0.012307	0.0647022	0.671564	0.0602776	0.216912	FALSE
512.7	Shortness of breath	respiratory	111	911	0.0505925	0.0359468	1.42914	0.000532871	0.00462567	1.64125	2.2599e-06	3.34631e-05	FALSE
240	Simple and unspecified goiter	endocrine/metabolic	18	80	0.00820419	0.00315669	2.61221	0.000245161	0.00242754	2.30437	0.00167538	0.0124611	FALSE
819	Skull and face fracture and other intercranial injury	injuries & poisonings	11	59	0.00501367	0.00232806	2.1594	0.0193527	0.0918684	2.48091	0.00674727	0.0410947	FALSE
327.3	Sleep apnea	neurological	19	114	0.00865998	0.00449828	1.93326	0.00806085	0.0459725	1.82381	0.0167508	0.0845908	FALSE
327	Sleep disorders	neurological	13	86	0.00592525	0.00339344	1.75054	0.0606079	0.21933	1.67916	0.0854299	0.27632	FALSE
772.2	Spasm of muscle	symptoms	16	112	0.00729262	0.00441937	1.65493	0.0603351	0.218833	1.4569	0.16427	0.432514	FALSE
721.1	Spondylosis without myelopathy	musculoskeletal	13	69	0.00592525	0.00272265	2.1833	0.0100083	0.054572	1.83941	0.045913	0.178803	FALSE
840	Sprains and strains	injuries & poisonings	57	449	0.0259799	0.0177169	1.47883	0.00600581	0.036283	1.45689	0.00899579	0.0513046	FALSE
841	Sprains and strains of back and neck	injuries & poisonings	28	152	0.0127621	0.00599771	2.1424	0.000230367	0.00230939	2.32406	5.96018e-05	0.00071789	FALSE
41.2	Streptococcus infection	infectious diseases	28	418	0.0127621	0.0164937	0.77083	0.185273	0.46825	0.798053	0.254118	0.595277	FALSE
624.9	stress incontinence, female	genitourinary	11	137	0.00501367	0.00540583	0.927091	0.809586	0.970648	0.749224	0.360032	0.74883	FALSE
368.9	Subjective visual disturbances	sense organs	23	95	0.0104831	0.00374857	2.8156	9.2495e-06	0.000130953	3.00371	3.61899e-06	5.26221e-05	FALSE
316	Substance addiction and disorders	mental disorders	37	404	0.0168642	0.0159413	1.05889	0.741164	0.970648	1.33992	0.0969296	0.301434	FALSE
297.1	Suicidal ideation	mental disorders	15	113	0.00683683	0.00445882	1.537	0.118995	0.347302	2.10018	0.00834676	0.0484592	FALSE
681	Superficial cellulitis and abscess	dermatologic	37	234	0.0168642	0.00923332	1.84062	0.00062372	0.00532637	1.99246	0.000143971	0.00159157	FALSE
915	Superficial injury without mention of infection	injuries & poisonings	24	250	0.0109389	0.00986466	1.11011	0.626869	0.970648	1.2088	0.382886	0.77538	FALSE
381.11	Suppurative and unspecified otitis media	sense organs	31	212	0.0141294	0.00836523	1.69894	0.00618558	0.0371135	1.76859	0.00367339	0.0249111	FALSE
771.1	Swelling of limb	symptoms	38	318	0.01732	0.0125478	1.38702	0.0587633	0.214879	1.40674	0.0512838	0.196142	FALSE
293.1	Swelling, mass, or lump in head and neck [Space-occupying lesion, intracranial NOS]	mental disorders	30	208	0.0136737	0.00820739	1.67525	0.00867203	0.0491111	1.79838	0.00318892	0.0220898	FALSE
687	Symptoms affecting skin	dermatologic	12	76	0.00546946	0.00299886	1.82838	0.0526711	0.197242	1.72641	0.0822643	0.269775	FALSE
429.3	Symptoms involving cardiovascular system	circulatory system	16	72	0.00729262	0.00284102	2.57841	0.000635788	0.00537258	2.59918	0.000694211	0.00592834	FALSE
561	Symptoms involving digestive system	digestive	23	138	0.0104831	0.00544529	1.93498	0.00353954	0.023903	1.69389	0.0209134	0.100008	FALSE
624	Symptoms involving female genital tract	genitourinary	43	298	0.0195989	0.0117587	1.68009	0.00162809	0.0125729	1.91288	0.000112251	0.00128491	FALSE
772	Symptoms of the muscles	symptoms	15	135	0.00683683	0.00532691	1.2854	0.357884	0.736442	1.01828	0.9474	1	FALSE
788	Syncope and collapse	symptoms	64	538	0.0291705	0.0212287	1.38534	0.0151027	0.0752336	1.51213	0.00232524	0.0167542	FALSE
727.1	Synovitis and tenosynovitis	musculoskeletal	31	267	0.0141294	0.0105355	1.34602	0.119886	0.349269	1.14141	0.491465	0.918085	FALSE
695.42	Systemic lupus erythematosus	dermatologic	20	99	0.00911577	0.0039064	2.34581	0.00053307	0.00462567	2.30488	0.000811072	0.00674779	FALSE
427.7	Tachycardia NOS	circulatory system	85	871	0.038742	0.0343685	1.13238	0.28332	0.623905	1.38181	0.00596743	0.0369021	FALSE
306.9	Tension headache	mental disorders	14	139	0.00638104	0.00548475	1.16446	0.588297	0.970648	1.28779	0.374126	0.765968	FALSE
763	Thoracic or lumbosacral neuritis or radiculitis, unspecified	symptoms	15	79	0.00683683	0.00311723	2.20145	0.00522163	0.0326655	2.04838	0.0120491	0.0652591	FALSE
636.1	Threatened premature labor	pregnancy complications	64	422	0.0291705	0.0166515	1.77441	2.48979e-05	0.000329387	2.08789	1.10423e-07	2.00251e-06	FALSE
478	Throat pain	respiratory	26	178	0.0118505	0.00702364	1.69547	0.0124011	0.0649852	2.12988	0.000440637	0.00408509	FALSE
287.3	Thrombocytopenia	hematopoietic	39	803	0.0177758	0.0316853	0.553065	0.000344913	0.00323657	0.550325	0.000326198	0.0032499	FALSE
242	Thyrotoxicosis with or without goiter	endocrine/metabolic	37	200	0.0168642	0.00789173	2.15645	2.03819e-05	0.000278782	1.93441	0.000297006	0.00299605	FALSE
389.4	Tinnitus	sense organs	10	124	0.00455789	0.00489287	0.931223	0.828781	0.970648	0.836652	0.58976	1	FALSE
318	Tobacco use disorder	mental disorders	38	310	0.01732	0.0122322	1.42327	0.041726	0.166286	1.56959	0.0107915	0.0592439	FALSE
291.1	Transient mental disorders due to conditions classified elsewhere	mental disorders	13	179	0.00592525	0.00706309	0.837943	0.539431	0.970648	0.737691	0.294232	0.657743	FALSE
10	Tuberculosis	infectious diseases	11	31	0.00501367	0.00122322	4.11437	5.76294e-05	0.000715491	3.82713	0.000168653	0.00185174	FALSE
250.1	Type 1 diabetes	endocrine/metabolic	11	89	0.00501367	0.00351182	1.42981	0.264422	0.595225	1.52307	0.195044	0.489819	FALSE
250.2	Type 2 diabetes	endocrine/metabolic	74	687	0.0337284	0.0271081	1.25274	0.0701373	0.243969	1.24097	0.0871954	0.281467	FALSE
663	Umbilical cord complications during labor and delivery	pregnancy complications	101	4388	0.0460346	0.173144	0.230448	6.90944e-46	5.57592e-44	0.233494	8.9998e-45	7.64509e-43	FALSE
550.4	Umbilical hernia	digestive	13	90	0.00592525	0.00355128	1.67247	0.0839006	0.263454	1.63927	0.0999785	0.307949	FALSE
709.7	Unspecified diffuse connective tissue disease	dermatologic	18	79	0.00820419	0.00311723	2.64538	0.000206299	0.00213146	2.40135	0.000930536	0.00747207	FALSE
599.4	Urinary incontinence	genitourinary	10	171	0.00455789	0.00674743	0.674014	0.226369	0.551151	0.591266	0.108465	0.32359	FALSE
591	Urinary tract infection	genitourinary	255	1985	0.116226	0.0783254	1.54752	6.20122e-10	1.31694e-08	1.6653	1.20655e-12	3.35754e-11	FALSE
947	Urticaria	dermatologic	40	284	0.0182315	0.0112063	1.63855	0.00374954	0.0249043	1.5867	0.00730553	0.0439967	FALSE
218.1	Uterine leiomyoma	neoplasms	157	960	0.0715588	0.0378803	1.9576	4.81085e-14	1.52249e-12	1.60215	1.98639e-07	3.52312e-06	FALSE
614.52	Vaginitis and vulvovaginitis	genitourinary	165	959	0.0752051	0.0378408	2.0677	9.37144e-17	3.60131e-15	2.01376	4.36161e-15	1.59992e-13	FALSE
671	Venous/cerebrovascular complications embolism in pregnancy and the puerperium	pregnancy complications	55	1023	0.0250684	0.0403662	0.61128	0.00044846	0.00402136	0.597649	0.000258615	0.00265863	FALSE
70.2	Viral hepatitis B	infectious diseases	10	94	0.00455789	0.00370911	1.22988	0.534805	0.970648	1.02108	0.950429	1	FALSE
79	Viral infection	infectious diseases	78	644	0.0355515	0.0254114	1.41375	0.00454186	0.0288605	1.69041	2.3473e-05	0.000310537	FALSE
78	Viral warts & HPV	infectious diseases	72	538	0.0328168	0.0212287	1.56439	0.000449056	0.00402136	1.41932	0.00660738	0.0403951	FALSE
79.9	Viremia, NOS	infectious diseases	19	209	0.00865998	0.00824685	1.05053	0.837693	0.970648	1.12022	0.640244	1	FALSE
368	Visual disturbances	sense organs	36	338	0.0164084	0.013337	1.23413	0.233964	0.560998	1.30859	0.132665	0.372387	FALSE
261.2	Vitamin B-complex deficiencies	endocrine/metabolic	20	114	0.00911577	0.00449828	2.03594	0.00349739	0.0238177	1.7469	0.0234013	0.108847	FALSE
261.4	Vitamin D deficiency	endocrine/metabolic	219	909	0.0998177	0.0358679	2.98063	1.18732e-43	8.71064e-42	2.60343	8.39144e-33	5.64325e-31	FALSE
473.4	Voice disturbance	respiratory	11	49	0.00501367	0.00193347	2.60112	0.00425264	0.0271295	2.32284	0.0125578	0.0668919	FALSE
512.1	Wheezing	respiratory	20	103	0.00911577	0.00406424	2.25436	0.000923805	0.00753041	2.47588	0.000284239	0.00290355	FALSE
442.11	Abdominal aortic aneurysm	circulatory system											TRUE
550	Abdominal hernia	digestive											TRUE
790.9	Abnormal arterial blood gases	symptoms											TRUE
512.3	Abnormal chest sounds	respiratory											TRUE
598	Abnormal findings on examination of urine	genitourinary											TRUE
611	Abnormal findings on mammogram or breast exam	genitourinary											TRUE
346	Abnormal findings on study of brain and/or nervous system	neurological											TRUE
429.2	Abnormal function study of cardiovascular system	circulatory system											TRUE
701.5	Abnormal granulation tissue	dermatologic											TRUE
781.2	Abnormal posture	symptoms											TRUE
350.5	Abnormal reflex	neurological											TRUE
589	Abnormal results of function study of kidney	genitourinary											TRUE
514.1	Abnormal results of function study of pulmonary system	respiratory											TRUE
794	Abnormal results of other function studies (bladder, pancreas, placenta, spleen, etc)	symptoms											TRUE
609.2	Abnormal spermatozoa	genitourinary											TRUE
516	Abnormal sputum	respiratory											TRUE
350.2	Abnormality of gait	neurological											TRUE
289.9	Abnormality of red blood cells	hematopoietic											TRUE
251.8	Abnormality of secretion of glucagon or gastrin	endocrine/metabolic											TRUE
614.54	Abscess or ulceration of vulva	genitourinary											TRUE
276.4	Acid-base balance disorder	endocrine/metabolic											TRUE
276.41	Acidosis	endocrine/metabolic											TRUE
175	Acquired absence of breast	neoplasms											TRUE
701.6	Acquired acanthosis nigricans	dermatologic											TRUE
286.4	Acquired coagulation factor deficiency	hematopoietic											TRUE
736.2	Acquired deformities of finger	musculoskeletal											TRUE
736.1	Acquired deformities of forearm	musculoskeletal											TRUE
736.3	Acquired deformities of hip	musculoskeletal											TRUE
736.5	Acquired deformities of knee	musculoskeletal											TRUE
735	Acquired foot deformities	musculoskeletal											TRUE
283	Acquired hemolytic anemias	hematopoietic											TRUE
738.4	Acquired spondylolisthesis	musculoskeletal											TRUE
735.2	Acquired toe deformities	musculoskeletal											TRUE
253.11	Acromegaly and gigantism	endocrine/metabolic											TRUE
702.1	Actinic keratosis	dermatologic											TRUE
323.2	Acute (transverse) myelitis	neurological											TRUE
474	Acute and chronic tonsillitis	respiratory											TRUE
573.4	Acute and subacute necrosis of liver	digestive											TRUE
540.11	Acute appendicitis	digestive											TRUE
498	Acute bronchospasm	respiratory											TRUE
938.1	Acute dermatitis due to solar radiation	dermatologic											TRUE
446.2	Acute febrile mucocutaneous lymph node syndrome (Kawasaki disease)	circulatory system											TRUE
535.1	Acute gastritis	digestive											TRUE
580.13	Acute glomerulonephritis, NOS	genitourinary											TRUE
465.4	Acute laryngitis and tracheitis	respiratory											TRUE
420.21	Acute pericarditis	circulatory system											TRUE
523.31	Acute periodontitis	digestive											TRUE
585.1	Acute renal failure	genitourinary											TRUE
394.4	Acute rheumatic heart disease	circulatory system											TRUE
474.1	Acute tonsillitis	respiratory											TRUE
441.1	Acute vascular insufficiency of intestine	circulatory system											TRUE
433.6	Acute, but ill-defined cerebrovascular disease	circulatory system											TRUE
255.2	Adrenal hypofunction	endocrine/metabolic											TRUE
255.3	Adrenogenital disorders	endocrine/metabolic											TRUE
260.3	Adult failure to thrive	endocrine/metabolic											TRUE
979	Adverse drug events and drug allergies	injuries & poisonings											TRUE
960.1	Adverse effects of antibacterials (not penicillins)	injuries & poisonings											TRUE
967	Adverse effects of sedatives or other central nervous system depressants and anesthetics	injuries & poisonings											TRUE
941	Adverse reaction to serum or vaccine	injuries & poisonings											TRUE
317	Alcohol-related disorders	mental disorders											TRUE
317.11	Alcoholic liver damage	mental disorders											TRUE
276.42	Alkalosis	endocrine/metabolic											TRUE
287.2	Allergic purpura	hematopoietic											TRUE
930	Allergic reaction to food	injuries & poisonings											TRUE
960.2	Allergy/adverse effect of penicillin	injuries & poisonings											TRUE
704.11	Alopecia Areata	dermatologic											TRUE
270.34	Alpha-1-antitrypsin deficiency	endocrine/metabolic											TRUE
292.4	Altered mental status	mental disorders											TRUE
110.12	Althete's foot	infectious diseases											TRUE
368.1	Amblyopia	sense organs											TRUE
270.33	Amyloidosis	endocrine/metabolic											TRUE
565.1	Anal and rectal polyp	digestive											TRUE
946	Anaphylactic shock NOS	injuries & poisonings											TRUE
285.21	Anemia in chronic kidney disease	hematopoietic											TRUE
285.22	Anemia in neoplastic disease	hematopoietic											TRUE
285.2	Anemia of chronic disease	hematopoietic											TRUE
411.41	Aneurysm and dissection of heart	circulatory system											TRUE
442.3	Aneurysm of artery of lower extremity	circulatory system											TRUE
442.2	Aneurysm of iliac artery	circulatory system											TRUE
442.8	Aneurysm of other specified artery	circulatory system											TRUE
411.3	Angina pectoris	circulatory system											TRUE
556.11	Angiodysplasia of intestine (without mention of hemorrhage)	digestive											TRUE
368.3	Anisometropia	sense organs											TRUE
715.2	Ankylosing spondylitis	musculoskeletal											TRUE
741.1	Ankylosis of joint	musculoskeletal											TRUE
759.1	Anomalies of endocrine glands, congenital	congenital anomalies											TRUE
526.3	Anomalies of jaw size/symmetry	digestive											TRUE
379.4	Anomalies of pupillary function	sense organs											TRUE
748	Anomalies of respiratory system, congenital	congenital anomalies											TRUE
524.3	Anomalies of tooth position/malocclusion	digestive											TRUE
426.4	Anomalous atrioventricular excitation	circulatory system											TRUE
260.6	Anorexia	endocrine/metabolic											TRUE
305.21	Anorexia nervosa	mental disorders											TRUE
334.2	Anterior horn cell disease	neurological											TRUE
253.4	Anterior pituitary disorders	endocrine/metabolic											TRUE
964.1	Anticoagulants causing adverse effects	injuries & poisonings											TRUE
963.1	Antineoplastic and immunosuppressive drugs causing adverse effects	injuries & poisonings											TRUE
965.2	Antirheumatics causing adverse effects in therapeutic use	injuries & poisonings											TRUE
301.2	Antisocial/borderline personality disorder	mental disorders											TRUE
300	Anxiety disorders	mental disorders											TRUE
442.1	Aortic aneurysm	circulatory system											TRUE
447.7	Aortic ectasia	circulatory system											TRUE
379.3	Aphakia and other disorders of lens	sense organs											TRUE
292.11	Aphasia	mental disorders											TRUE
292.1	Aphasia/speech disturbance	mental disorders											TRUE
284	Aplastic anemia	hematopoietic											TRUE
513.31	Apnea	respiratory											TRUE
540	Appendiceal conditions	digestive											TRUE
540.1	Appendicitis	digestive											TRUE
442.4	Arterial dissection	circulatory system											TRUE
444	Arterial embolism and thrombosis	circulatory system											TRUE
444.1	Arterial embolism and thrombosis of lower extremity artery	circulatory system											TRUE
446.9	Arteritis NOS	circulatory system											TRUE
526.42	Arthralgia/ankylosis of temporomandibular joint	digestive											TRUE
713	Arthropathy associated with other disorders classified elsewhere	musculoskeletal											TRUE
716.9	Arthropathy NOS	musculoskeletal											TRUE
133	Arthropod-borne diseases	infectious diseases											TRUE
742.8	Articular cartilage disorder	musculoskeletal											TRUE
414.2	ASCVD	circulatory system											TRUE
733.4	Aseptic necrosis of bone	musculoskeletal											TRUE
117.4	Aspergillosis	infectious diseases											TRUE
1013	Asphyxia and hypoxemia	NULL											TRUE
440	Atherosclerosis	circulatory system											TRUE
440.22	Atherosclerosis of native arteries of the extremities with intermittent claudication	circulatory system											TRUE
440.21	Atherosclerosis of native arteries of the extremities with ulceration or gangrene	circulatory system											TRUE
440.1	Atherosclerosis of renal artery	circulatory system											TRUE
440.2	Atherosclerosis of the extremities	circulatory system											TRUE
427.21	Atrial fibrillation	circulatory system											TRUE
427.22	Atrial flutter	circulatory system											TRUE
426.2	Atrioventricular [AV] block	circulatory system											TRUE
426.24	Atrioventricular block, complete	circulatory system											TRUE
624.2	Atrophy of female genital tract	genitourinary											TRUE
313.3	Autism	mental disorders											TRUE
279.2	Autoimmune disease NEC	endocrine/metabolic											TRUE
283.1	Autoimmune hemolytic anemias	hematopoietic											TRUE
609.11	Azoospermia and oligospermia	genitourinary											TRUE
8.5	Bacterial enteritis	infectious diseases											TRUE
480.1	Bacterial pneumonia	respiratory											TRUE
539	Bariatric surgery	digestive											TRUE
530.13	Barrett's esophagus	digestive											TRUE
172.21	Basal cell carcinoma	neoplasms											TRUE
711.3	Behcet's syndrome	musculoskeletal											TRUE
227.1	Benign neoplasm of adrenal gland	neoplasms											TRUE
213	Benign neoplasm of bone and articular cartilage	neoplasms											TRUE
225.1	Benign neoplasm of brain, cranial nerves, meninges	neoplasms											TRUE
208	Benign neoplasm of colon	neoplasms											TRUE
224	Benign neoplasm of eye	neoplasms											TRUE
224.1	Benign neoplasm of eye, uveal	neoplasms											TRUE
223	Benign neoplasm of kidney and other urinary organs	neoplasms											TRUE
210	Benign neoplasm of lip, oral cavity, and pharynx	neoplasms											TRUE
229.1	Benign neoplasm of lymph nodes	neoplasms											TRUE
221	Benign neoplasm of other female genital organs	neoplasms											TRUE
211	Benign neoplasm of other parts of digestive system	neoplasms											TRUE
227.2	Benign neoplasm of parathyroid gland	neoplasms											TRUE
212	Benign neoplasm of respiratory and intrathoracic organs	neoplasms											TRUE
225.2	Benign neoplasm of spinal cord, meninges	neoplasms											TRUE
226	Benign neoplasm of thyroid glands	neoplasms											TRUE
229	Benign neoplasm of unspecified sites	neoplasms											TRUE
596.1	Bladder neck obstruction	genitourinary											TRUE
367.9	Blindness and low vision	sense organs											TRUE
911	Blister	injuries & poisonings											TRUE
170.1	Bone cancer	neoplasms											TRUE
860	Bone marrow or stem cell transplant	neoplasms											TRUE
174.1	Breast cancer [female]	neoplasms											TRUE
612	Breast conditions, congenital or relating to hormones	genitourinary											TRUE
613.9	Breast disorder NOS	genitourinary											TRUE
873	Broken tooth	injuries & poisonings											TRUE
496.3	Bronchiectasis	respiratory											TRUE
480.5	Bronchopneumonia and lung abscess	respiratory											TRUE
695.2	Bullous dermatoses	dermatologic											TRUE
426.3	Bundle branch block	circulatory system											TRUE
726.3	Bursitis	musculoskeletal											TRUE
727.2	Bursitis disorders	musculoskeletal											TRUE
260.1	Cachexia	endocrine/metabolic											TRUE
726.4	Calcaneal spur; Exostosis NOS	musculoskeletal											TRUE
594.2	Calculus of lower urinary tract	genitourinary											TRUE
594.3	Calculus of ureter	genitourinary											TRUE
189.2	Cancer of bladder	neoplasms											TRUE
191.11	Cancer of brain	neoplasms											TRUE
191.1	Cancer of brain and nervous system	neoplasms											TRUE
165.1	Cancer of bronchus; lung	neoplasms											TRUE
170.2	Cancer of connective tissue	neoplasms											TRUE
190	Cancer of eye	neoplasms											TRUE
164	Cancer of intrathoracic organs	neoplasms											TRUE
149.4	Cancer of larynx	neoplasms											TRUE
145.3	Cancer of major salivary glands	neoplasms											TRUE
145	Cancer of mouth	neoplasms											TRUE
149.9	Cancer of of nasal cavities	neoplasms											TRUE
194	Cancer of other endocrine glands	neoplasms											TRUE
184	Cancer of other female genital organs	neoplasms											TRUE
184.2	Cancer of other female genital organs (excluding uterus and ovary)	neoplasms											TRUE
151	Cancer of stomach	neoplasms											TRUE
145.4	Cancer of the gums	neoplasms											TRUE
145.2	Cancer of tongue	neoplasms											TRUE
165	Cancer within the respiratory system	neoplasms											TRUE
195	Cancer, suspected or other	neoplasms											TRUE
112.3	Candidiasis of skin and nails	infectious diseases											TRUE
172.3	Carcinoma in situ of skin	neoplasms											TRUE
747	Cardiac and circulatory congenital anomalies	congenital anomalies											TRUE
427.42	Cardiac arrest	circulatory system											TRUE
429.9	Cardiac complications, not elsewhere classified	circulatory system											TRUE
426	Cardiac conduction disorders	circulatory system											TRUE
426.91	Cardiac pacemaker in situ	circulatory system											TRUE
797.1	Cardiogenic shock	symptoms											TRUE
416	Cardiomegaly	circulatory system											TRUE
277.8	Carnitine deficiencies	endocrine/metabolic											TRUE
347	Cataplexy and narcolepsy	neurological											TRUE
366	Cataract	sense organs											TRUE
681.2	Cellulitis and abscess of face/neck	dermatologic											TRUE
681.6	Cellulitis and abscess of foot, toe	dermatologic											TRUE
681.5	Cellulitis and abscess of leg, except foot	dermatologic											TRUE
528.3	Cellulitis and abscess of oral soft tissues	digestive											TRUE
681.7	Cellulitis and abscess of trunk	dermatologic											TRUE
386.21	Central origin vertigo	sense organs											TRUE
327.31	Central/nonobstroctive sleep apnea	neurological											TRUE
433.5	Cerebral aneurysm	circulatory system											TRUE
433.21	Cerebral artery occlusion, with cerebral infarction	circulatory system											TRUE
348.4	Cerebral cysts	neurological											TRUE
331.9	Cerebral degeneration, unspecified	neurological											TRUE
348.2	Cerebral edema and compression of brain	neurological											TRUE
433.3	Cerebral ischemia	circulatory system											TRUE
816	Cerebral laceration and contusion	injuries & poisonings											TRUE
433	Cerebrovascular disease	circulatory system											TRUE
958	Certain early complications of trauma or procedure	injuries & poisonings											TRUE
180.1	Cervical cancer	neoplasms											TRUE
765	Cervical radiculitis	symptoms											TRUE
767	Cervicocranial/Cervicobrachial syndrome	symptoms											TRUE
687.3	Changes in skin texture	dermatologic											TRUE
575.1	Cholangitis	digestive											TRUE
385.3	Cholesteatoma	sense organs											TRUE
575.6	Cholesterolosis of gallbladder	digestive											TRUE
733.9	Chondromalacia	musculoskeletal											TRUE
363	Chorioretinal inflammations, scars, and other disorders of choroid	sense organs											TRUE
363.3	Chorioretinal scars	sense organs											TRUE
758	Chromosomal anomalies and genetic disorders	congenital anomalies											TRUE
496	Chronic airway obstruction	respiratory											TRUE
496.2	Chronic bronchitis	respiratory											TRUE
592.12	Chronic cystitis	genitourinary											TRUE
938.2	Chronic dermatitis due to solar radiation	dermatologic											TRUE
580.14	Chronic glomerulonephritis, NOS	genitourinary											TRUE
81.12	Chronic graft-versus-host disease	infectious diseases											TRUE
70.4	Chronic hepatitis	infectious diseases											TRUE
592.13	Chronic interstitial cystitis	genitourinary											TRUE
585.4	Chronic kidney disease, Stage I or II	genitourinary											TRUE
585.33	Chronic Kidney Disease, Stage III	genitourinary											TRUE
585.34	Chronic Kidney Disease, Stage IV	genitourinary											TRUE
473.1	Chronic laryngitis	respiratory											TRUE
495.1	Chronic obstructive asthma	respiratory											TRUE
710.12	Chronic osteomyelitis	musculoskeletal											TRUE
355.1	Chronic pain syndrome	neurological											TRUE
577.2	Chronic pancreatitis	digestive											TRUE
573.1	Chronic passive congestion of liver	digestive											TRUE
420.22	Chronic pericarditis	circulatory system											TRUE
523.32	Chronic periodontitis	digestive											TRUE
415.2	Chronic pulmonary heart disease	circulatory system											TRUE
585.3	Chronic renal failure [CKD]	genitourinary											TRUE
245.2	Chronic thyroiditis	endocrine/metabolic											TRUE
707.2	Chronic ulcer of leg or foot	dermatologic											TRUE
707.3	Chronic ulcer of unspecified site	dermatologic											TRUE
441.2	Chronic vascular insufficiency of intestine	circulatory system											TRUE
456	Chronic venous insufficiency [CVI]	circulatory system											TRUE
327.6	Circadian rhythm sleep disorder	neurological											TRUE
459.9	Circulatory disease NEC	circulatory system											TRUE
701.3	Circumscribed scleroderma	dermatologic											TRUE
571.51	Cirrhosis of liver without mention of alcohol	digestive											TRUE
735.22	Claw toe (acquired)	musculoskeletal											TRUE
749.1	Cleft palate	congenital anomalies											TRUE
117.2	Coccidioidomycosis	infectious diseases											TRUE
153.2	Colon cancer	neoplasms											TRUE
368.5	Color vision deficiencies	sense organs											TRUE
348.7	Coma	neurological											TRUE
355	Complex regional/central pain syndrome	neurological											TRUE
859	Complication due to other implant and internal device	injuries & poisonings											TRUE
874	Complication of amputation stump	injuries & poisonings											TRUE
853	Complication of colostomy or enterostomy	injuries & poisonings											TRUE
858	Complication of internal orthopedic device	injuries & poisonings											TRUE
639	Complications following abortion or ectopic and molar pregnancies	pregnancy complications											TRUE
854	Complications of cardiac/vascular device, implant, and graft	injuries & poisonings											TRUE
536.7	Complications of gastrostomy, colostomy and enterostomy	digestive											TRUE
679	Complications of in utero procedures	pregnancy complications											TRUE
668	Complications of the administration of anesthetic or other sedation in labor and delivery	pregnancy complications											TRUE
851	Complications of transplants and reattached limbs	injuries & poisonings											TRUE
817	Concussion	injuries & poisonings											TRUE
656.7	Conditions involving the integument and temperature regulation of fetus and newborn	pregnancy complications											TRUE
312	Conduct disorders	mental disorders											TRUE
389.2	Conductive hearing loss	sense organs											TRUE
756.1	Congenital anomalies of abdominal wall; diaphram	congenital anomalies											TRUE
612.3	Congenital anomalies of breast	genitourinary											TRUE
749	Congenital anomalies of face and neck	congenital anomalies											TRUE
751.1	Congenital anomalies of genital organs	congenital anomalies											TRUE
747.13	Congenital anomalies of great vessels	congenital anomalies											TRUE
750.21	Congenital anomalies of intestine	congenital anomalies											TRUE
755	Congenital anomalies of limbs	congenital anomalies											TRUE
751.12	Congenital anomalies of male genital organs	congenital anomalies											TRUE
750.13	Congenital anomalies of mouth/tongue	congenital anomalies											TRUE
756.3	Congenital anomalies of muscle, tendon, fascia, and connective tissue	congenital anomalies											TRUE
747.2	Congenital anomalies of peripheral vascular system	congenital anomalies											TRUE
753.2	Congenital anomalies of posterior segment of eye	congenital anomalies											TRUE
691	Congenital anomalies of skin	dermatologic											TRUE
749.2	Congenital anomalies of skull and face bones	congenital anomalies											TRUE
750.15	Congenital anomalies of stomach	congenital anomalies											TRUE
753	Congenital anomalies of the eye	congenital anomalies											TRUE
757	Congenital anomalies of the integument	congenital anomalies											TRUE
755.4	Congenital anomalies of upper limb, including shoulder girdle	congenital anomalies											TRUE
751.2	Congenital anomalies of urinary system	congenital anomalies											TRUE
755.3	Congenital anomaly of fingers/toes	congenital anomalies											TRUE
750.22	Congenital anomaly of gallbladder, bile ducts, liver, pancreas	congenital anomalies											TRUE
753.1	Congenital cataract and lens anomalies	congenital anomalies											TRUE
286.1	Congenital coagulation defects	hematopoietic											TRUE
286.12	Congenital deficiency of other clotting factors (including factor VII)	hematopoietic											TRUE
755.1	Congenital deformities of feet	congenital anomalies											TRUE
286.13	Congenital factor VIII disorder	hematopoietic											TRUE
755.61	Congenital hip dysplasia and deformity	congenital anomalies											TRUE
244.5	Congenital hypothyroidism	endocrine/metabolic											TRUE
754	Congenital musculoskeletal deformities of spine	congenital anomalies											TRUE
756.5	Congenital osteodystrophies	congenital anomalies											TRUE
691.3	Congenital pigmentary anomalies of skin	dermatologic											TRUE
428.1	Congestive heart failure (CHF) NOS	circulatory system											TRUE
371.2	Conjunctivitis, noninfectious	sense organs											TRUE
284.2	Constitutional aplastic anemia	hematopoietic											TRUE
939.1	Contact and allergic dermatitis of eyelid	dermatologic											TRUE
931	Contact dermatitis and other eczema due to plants [except food]	dermatologic											TRUE
739	Contracture of joint	musculoskeletal											TRUE
728.71	Contracture of palmar fascia [Dupuytren's disease]	musculoskeletal											TRUE
727.7	Contracture of tendon (sheath)	musculoskeletal											TRUE
345.3	Convulsions	neurological											TRUE
364.9	Cornea replaced by transplant	sense organs											TRUE
364.4	Corneal degenerations	sense organs											TRUE
364.5	Corneal dystrophy	sense organs											TRUE
364.2	Corneal edema	sense organs											TRUE
364.1	Corneal opacity	sense organs											TRUE
364	Corneal opacity and other disorders of cornea	sense organs											TRUE
370.1	Corneal ulcer	sense organs											TRUE
700	Corns and callosities	dermatologic											TRUE
411.4	Coronary atherosclerosis	circulatory system											TRUE
733.6	Costochondritis	musculoskeletal											TRUE
771.2	Cramp of limb	symptoms											TRUE
1006	Crushing injury	NULL											TRUE
1008	Crushing or internal injury to organs	NULL											TRUE
737	Curvature of spine	musculoskeletal											TRUE
255.11	Cushing's syndrome	endocrine/metabolic											TRUE
695.41	Cutaneous lupus erythematosus	dermatologic											TRUE
577.3	Cyst and pseudocyst of pancreas	digestive											TRUE
733.2	Cyst of bone	musculoskeletal											TRUE
586.2	Cyst of kidney, acquired	genitourinary											TRUE
528.41	Cyst of the salivary gland	digestive											TRUE
614.53	Cyst or abscess of Bartholin's gland	genitourinary											TRUE
499	Cystic fibrosis	respiratory											TRUE
751.21	Cystic kidney disease	congenital anomalies											TRUE
362.23	Cystoid macular degeneration of retina	sense organs											TRUE
528.4	Cysts of oral soft tissues	digestive											TRUE
526.1	Cysts of the jaws	digestive											TRUE
799	Debility unspecified	symptoms											TRUE
302.1	Decreased libido	mental disorders											TRUE
707.1	Decubitus ulcer	dermatologic											TRUE
452.2	Deep vein thrombosis [DVT]	circulatory system											TRUE
286.6	Defibrination syndrome	hematopoietic											TRUE
281.9	Deficiency anemias	hematopoietic											TRUE
279.11	Deficiency of humoral immunity	endocrine/metabolic											TRUE
389.3	Degenerative and vascular disorders of ear	sense organs											TRUE
334	Degenerative disease of the spinal cord	neurological											TRUE
702	Degenerative skin conditions and other dermatoses	dermatologic											TRUE
290.2	Delirium due to conditions classified elsewhere	mental disorders											TRUE
290.1	Dementias	mental disorders											TRUE
521.2	Dental abrasion, erosion and attrition	digestive											TRUE
521.1	Dental caries	digestive											TRUE
524	Dentofacial anomalies, including malocclusion	digestive											TRUE
509.8	Dependence on respirator [Ventilator] or supplemental oxygen	respiratory											TRUE
742	Derangement of joint, non-traumatic	musculoskeletal											TRUE
938	Dermatitis due to solar radiation	dermatologic											TRUE
695.21	Dermatitis herpetiformis	dermatologic											TRUE
374.6	Dermatochalasis	sense organs											TRUE
709.5	Dermatomyositis	dermatologic											TRUE
110.1	Dermatophytosis	infectious diseases											TRUE
110.13	Dermatophytosis of the body	infectious diseases											TRUE
315	Develomental delays and disorders	mental disorders											TRUE
253.3	Diabetes insipidus	endocrine/metabolic											TRUE
250	Diabetes mellitus	endocrine/metabolic											TRUE
250.15	Diabetes type 1 with peripheral circulatory disorders	endocrine/metabolic											TRUE
250.25	Diabetes type 2 with peripheral circulatory disorders	endocrine/metabolic											TRUE
250.7	Diabetic retinopathy	endocrine/metabolic											TRUE
550.2	Diaphragmatic hernia	digestive											TRUE
741.3	Difficulty in walking	musculoskeletal											TRUE
368.2	Diplopia and disorders of binocular vision	sense organs											TRUE
448	Disease of capillaries	circulatory system											TRUE
394.7	Disease of tricuspid valve	circulatory system											TRUE
529	Diseases and other conditions of the tongue	digestive											TRUE
31	Diseases due to other mycobacteria	infectious diseases											TRUE
530	Diseases of esophagus	digestive											TRUE
521	Diseases of hard tissues of teeth	digestive											TRUE
528.5	Diseases of lips	digestive											TRUE
577	Diseases of pancreas	digestive											TRUE
522	Diseases of pulp and periapical tissues	digestive											TRUE
289.5	Diseases of spleen	hematopoietic											TRUE
526	Diseases of the jaws	digestive											TRUE
473	Diseases of the larynx and vocal cords	respiratory											TRUE
527	Diseases of the salivary glands	digestive											TRUE
254	Diseases of thymus gland	endocrine/metabolic											TRUE
288	Diseases of white blood cells	hematopoietic											TRUE
830	Dislocation	injuries & poisonings											TRUE
279	Disorders involving the immune mechanism	endocrine/metabolic											TRUE
368.7	Disorders of accommodation	sense organs											TRUE
389.5	Disorders of acoustic nerve	sense organs											TRUE
255	Disorders of adrenal glands	endocrine/metabolic											TRUE
270.2	Disorders of amino-acid metabolism	endocrine/metabolic											TRUE
277.4	Disorders of bilirubin excretion	endocrine/metabolic											TRUE
275.5	Disorders of calcium/phosphorus metabolism	endocrine/metabolic											TRUE
724.2	Disorders of coccyx	musculoskeletal											TRUE
275.2	Disorders of copper metabolism	endocrine/metabolic											TRUE
513.8	Disorders of diaphragm	respiratory											TRUE
530.5	Disorders of esophageal motility	digestive											TRUE
380	Disorders of external ear	sense organs											TRUE
379.5	Disorders of iris and ciliary body	sense organs											TRUE
275.1	Disorders of iron metabolism	hematopoietic											TRUE
375	Disorders of lacrimal system	sense organs											TRUE
275	Disorders of mineral metabolism	endocrine/metabolic											TRUE
728	Disorders of muscle, ligament, and fascia	musculoskeletal											TRUE
377	Disorders of optic nerve and visual pathways	sense organs											TRUE
352	Disorders of other cranial nerves	neurological											TRUE
252	Disorders of parathyroid gland	endocrine/metabolic											TRUE
604	Disorders of penis	genitourinary											TRUE
275.53	Disorders of phosphorus metabolism	endocrine/metabolic											TRUE
367	Disorders of refraction and accommodation; blindness and low vision	sense organs											TRUE
724.1	Disorders of sacrum	musculoskeletal											TRUE
705	Disorders of sweat glands	dermatologic											TRUE
337	Disorders of the autonomic nervous system	neurological											TRUE
360	Disorders of the globe	sense organs											TRUE
376	Disorders of the orbit	sense organs											TRUE
253	Disorders of the pituitary gland and its hypothalamic control	endocrine/metabolic											TRUE
270.21	Disorders of urea cycle metabolism	endocrine/metabolic											TRUE
588	Disorders resulting from impaired renal function	genitourinary											TRUE
303.1	Dissociative disorder	mental disorders											TRUE
527.7	Disturbance of salivary secretion	digestive											TRUE
520.2	Disturbances in tooth eruption	digestive											TRUE
270.1	Disturbances of amino-acid transport	endocrine/metabolic											TRUE
350.6	Disturbances of sensation of smell and taste	neurological											TRUE
562.2	Diverticulitis	digestive											TRUE
562.1	Diverticulosis	digestive											TRUE
531.3	Duodenal ulcer	digestive											TRUE
535.6	Duodenitis	digestive											TRUE
705.1	Dyshidrosis	dermatologic											TRUE
620	Dysplasia of female genital organs	genitourinary											TRUE
624.1	Dystrophy of female genital tract	genitourinary											TRUE
305.2	Eating disorder	mental disorders											TRUE
634.3	Ectopic pregnancy	pregnancy complications											TRUE
374.1	Ectropion or entropion	sense organs											TRUE
1014	Effects of heat, cold and air pressure	NULL											TRUE
990	Effects radiation NOS	injuries & poisonings											TRUE
276.1	Electrolyte imbalance	endocrine/metabolic											TRUE
790.8	Elevated C-reactive protein (CRP)	symptoms											TRUE
795.82	Elevated cancer antigen 125 [CA 125]	symptoms											TRUE
790.1	Elevated sedimentation rate	symptoms											TRUE
496.1	Emphysema	respiratory											TRUE
506	Empyema and pneumothorax	respiratory											TRUE
323	Encephalitis	neurological											TRUE
323.8	Encephalitis, non-infectious	neurological											TRUE
348.8	Encephalopathy, not elsewhere classified	neurological											TRUE
585.32	End stage renal disease	genitourinary											TRUE
420.3	Endocarditis	circulatory system											TRUE
656.3	Endocrine and metabolic disturbances of fetus and newborn	pregnancy complications											TRUE
621	Endometrial hyperplasia	genitourinary											TRUE
288.3	Eosinophilia	hematopoietic											TRUE
530.15	Eosinophilic esophagitis	digestive											TRUE
345.1	Epilepsy	neurological											TRUE
375.2	Epiphora	sense organs											TRUE
605	Erectile dysfunction [ED]	genitourinary											TRUE
695.81	Erythema nodosum	dermatologic											TRUE
690	Erythematosquamous dermatosis	dermatologic											TRUE
750.11	Esophageal atresia/tracheoesophageal fistula	congenital anomalies											TRUE
530.2	Esophageal bleeding (varices/hemorrhage)	digestive											TRUE
530.1	Esophagitis, GERD and related diseases	digestive											TRUE
333.1	Essential tremor	neurological											TRUE
242.3	Exophthalmos	endocrine/metabolic											TRUE
333	Extrapyramidal disease and abnormal movement disorders	neurological											TRUE
500.1	Extrinsic allergic alveolitis	respiratory											TRUE
369.2	Eye infection, viral	sense organs											TRUE
352.2	Facial nerve disorders [CN7]	neurological											TRUE
772.6	Facial weakness	symptoms											TRUE
264.2	Failure to thrive (childhood)	endocrine/metabolic											TRUE
550.3	Femoral hernia	digestive											TRUE
610.2	Fibroadenosis of breast	genitourinary											TRUE
610.3	Fibrosclerosis of breast	genitourinary											TRUE
426.21	First degree AV block	circulatory system											TRUE
735.1	Flat foot	musculoskeletal											TRUE
276.6	Fluid overload	endocrine/metabolic											TRUE
1001	Foreign body injury	NULL											TRUE
801	Fracture of ankle and foot	injuries & poisonings											TRUE
803.3	Fracture of clavicle or scapula	injuries & poisonings											TRUE
801.1	Fracture of foot	injuries & poisonings											TRUE
803.1	Fracture of humerus	injuries & poisonings											TRUE
800	Fracture of lower limb	injuries & poisonings											TRUE
800.1	Fracture of neck of femur	injuries & poisonings											TRUE
800.4	Fracture of patella	injuries & poisonings											TRUE
802	Fracture of pelvis	injuries & poisonings											TRUE
803.2	Fracture of radius and ulna	injuries & poisonings											TRUE
807	Fracture of ribs	injuries & poisonings											TRUE
800.3	Fracture of tibia and fibula	injuries & poisonings											TRUE
809	Fracture of unspecified bones	injuries & poisonings											TRUE
800.2	Fracture of unspecified part of femur	injuries & poisonings											TRUE
803	Fracture of upper limb	injuries & poisonings											TRUE
805	Fracture of vertebral column without mention of spinal cord injury	injuries & poisonings											TRUE
564	Functional digestive disorders	digestive											TRUE
596.5	Functional disorders of bladder	genitourinary											TRUE
791	Gangrene	symptoms											TRUE
531.2	Gastric ulcer	digestive											TRUE
530.7	Gastroesophageal laceration-hemorrhage syndrome	digestive											TRUE
569.2	Gastrointestinal complications	digestive											TRUE
303.31	Gastrointestinal malfunction arising from mental factors	mental disorders											TRUE
531.5	Gastrojejunal ulcer	digestive											TRUE
536.3	Gastroparesis	digestive											TRUE
345.11	Generalized convulsive epilepsy	neurological											TRUE
618	Genital prolapse	genitourinary											TRUE
736.4	Genu valgum or varum (acquired)	musculoskeletal											TRUE
446.5	Giant cell arteritis	circulatory system											TRUE
523	Gingival and periodontal diseases	digestive											TRUE
523.1	Gingivitis	digestive											TRUE
529.1	Glossitis	digestive											TRUE
529.6	Glossodynia	digestive											TRUE
255.21	Glucocorticoid deficiency	endocrine/metabolic											TRUE
250.5	Glycosuria or Acetonuria	endocrine/metabolic											TRUE
90.2	Gonococcal infections	infectious diseases											TRUE
274.1	Gout	endocrine/metabolic											TRUE
274.11	Gouty arthropathy	endocrine/metabolic											TRUE
81.1	Graft-versus-host disease	infectious diseases											TRUE
38.1	Gram negative septicemia	infectious diseases											TRUE
38.2	Gram positive septicemia	infectious diseases											TRUE
41.8	H. pylori	infectious diseases											TRUE
292.6	Hallucinations	mental disorders											TRUE
735.23	Hallux rigidus	musculoskeletal											TRUE
735.21	Hammer toe (acquired)	musculoskeletal											TRUE
428.2	Heart failure NOS	circulatory system											TRUE
428.4	Heart failure with preserved EF [Diastolic heart failure]	circulatory system											TRUE
428.3	Heart failure with reduced EF [Systolic or combined heart failure]	circulatory system											TRUE
429.1	Heart transplant/surgery	circulatory system											TRUE
395	Heart valve disorders	circulatory system											TRUE
395.6	Heart valve replaced	circulatory system											TRUE
134	Helminthiases	infectious diseases											TRUE
741.5	Hemarthrosis	musculoskeletal											TRUE
656.5	Hematological disorders of newborn	pregnancy complications											TRUE
342	Hemiplegia	neurological											TRUE
285.8	Hemoglobinuria	hematopoietic											TRUE
283.21	Hemolytic-uremic syndrome	hematopoietic											TRUE
516.1	Hemoptysis	respiratory											TRUE
635	Hemorrhage during pregnancy; childbirth and postpartum	pregnancy complications											TRUE
531.1	Hemorrhage from gastrointestinal ulcer	digestive											TRUE
459.1	Hemorrhage NOS	circulatory system											TRUE
656.4	Hemorrhage of fetus or newborn	pregnancy complications											TRUE
578.9	Hemorrhage of gastrointestinal tract	digestive											TRUE
286.5	Hemorrhagic disorder due to intrinsic circulating anticoagulants	hematopoietic											TRUE
70.9	Hepatitis NOS	infectious diseases											TRUE
356	Hereditary and idiopathic peripheral neuropathy	neurological											TRUE
275.11	Hereditary hemochromatosis	hematopoietic											TRUE
362.7	Hereditary retinal dystrophies	sense organs											TRUE
53.1	Herpes zoster with nervous system complications	infectious diseases											TRUE
705.3	Hidradenitis	dermatologic											TRUE
71.1	HIV infection, symptomatic	infectious diseases											TRUE
201	Hodgkin's disease	neoplasms											TRUE
71	Human immunodeficiency virus [HIV] disease	infectious diseases											TRUE
331.1	Hydrocephalus	neurological											TRUE
255.12	Hyperaldosteronism	endocrine/metabolic											TRUE
275.6	Hypercalcemia	endocrine/metabolic											TRUE
286.8	Hypercoagulable state	hematopoietic											TRUE
367.8	Hypermetropia	sense organs											TRUE
276.11	Hyperosmolality and/or hypernatremia	endocrine/metabolic											TRUE
252.1	Hyperparathyroidism	endocrine/metabolic											TRUE
276.13	Hyperpotassemia	endocrine/metabolic											TRUE
446.3	Hypersensitivity angiitis	circulatory system											TRUE
327.1	Hypersomnia	neurological											TRUE
401.22	Hypertensive chronic kidney disease	circulatory system											TRUE
401.2	Hypertensive heart and/or renal disease	circulatory system											TRUE
401.21	Hypertensive heart disease	circulatory system											TRUE
425.11	Hypertrophic obstructive cardiomyopathy	circulatory system											TRUE
612.2	Hypertrophy of breast (Gynecomastia)	genitourinary											TRUE
527.1	Hypertrophy of salivary gland	digestive											TRUE
513.4	Hyperventilation	respiratory											TRUE
275.51	Hypocalcemia	endocrine/metabolic											TRUE
252.2	Hypoparathyroidism	endocrine/metabolic											TRUE
458	Hypotension	circulatory system											TRUE
360.3	Hypotony of eye	sense organs											TRUE
513.3	Hypoventilation	respiratory											TRUE
258	Iatrogenic endocrine disorders	endocrine/metabolic											TRUE
458.2	Iatrogenic hypotension	circulatory system											TRUE
452.1	Iatrogenic pulmonary embolism and infarction	circulatory system											TRUE
691.1	Ichthyosis congenita	dermatologic											TRUE
504.1	Idiopathic fibrosing alveolitis	respiratory											TRUE
559	Ileostomy status	digestive											TRUE
279.1	Immunity deficiency	endocrine/metabolic											TRUE
560.2	Impaction of intestine	digestive											TRUE
686.2	Impetigo	dermatologic											TRUE
312.3	Impulse control disorder	mental disorders											TRUE
550.6	Incisional hernia	digestive											TRUE
343	Infantile cerebral palsy	neurological											TRUE
369	Infection of the eye	sense organs											TRUE
41.9	Infection with drug-resistant microorganisms	infectious diseases											TRUE
81	Infection/inflammation of internal prosthetic device; implant; and graft	infectious diseases											TRUE
657	Infections specific to the perinatal period	pregnancy complications											TRUE
79.2	Infectious mononucleosis	infectious diseases											TRUE
712	Infective connective tissue disorders	musculoskeletal											TRUE
132	Infestation (lice, mites)	infectious diseases											TRUE
371	Inflammation of the eye	sense organs											TRUE
526.5	Inflammatory conditions of jaw	digestive											TRUE
614.5	Inflammatory disease of cervix, vagina, and vulva	genitourinary											TRUE
614	Inflammatory diseases of female pelvic organs	genitourinary											TRUE
942	Infusion and transfusion reaction	injuries & poisonings											TRUE
703.1	Ingrowing nail	dermatologic											TRUE
550.1	Inguinal hernia	digestive											TRUE
907	Injuries to the nervous system	injuries & poisonings											TRUE
1007	Injury to blood vessels	NULL											TRUE
912	Insect bite	injuries & poisonings											TRUE
962.2	Insulins and antidiabetic agents causing adverse effects in therapeutic use	injuries & poisonings											TRUE
722.7	Intervertebral disc disorder with myelopathy	musculoskeletal											TRUE
8.51	Intestinal e.coli	infectious diseases											TRUE
134.1	Intestinal helminthiases	infectious diseases											TRUE
8.52	Intestinal infection due to C. difficile	infectious diseases											TRUE
8.7	Intestinal infection due to protozoa	infectious diseases											TRUE
430.2	Intracerebral hemorrhage	circulatory system											TRUE
430	Intracranial hemorrhage	circulatory system											TRUE
818	Intracranial hemorrhage (injury)	injuries & poisonings											TRUE
656.1	Isoimmunization of fetus or newborn	pregnancy complications											TRUE
573.5	Jaundice (not of newborn)	digestive											TRUE
526.9	Jaw disease NOS	digestive											TRUE
732.1	Juvenile osteochondrosis	musculoskeletal											TRUE
714.2	Juvenile rheumatoid arthritis	musculoskeletal											TRUE
701.4	Keloid scar	dermatologic											TRUE
370	Keratitis	sense organs											TRUE
370.3	Keratoconjunctivitis	sense organs											TRUE
364.41	Keratoconus	sense organs											TRUE
701.1	Keratoderma, acquired	dermatologic											TRUE
587	Kidney replaced by transpant	genitourinary											TRUE
260.21	Kwashiorkor	endocrine/metabolic											TRUE
737.1	Kyphosis (acquired)	musculoskeletal											TRUE
386.3	Labyrinthitis	sense organs											TRUE
350.3	Lack of coordination	neurological											TRUE
264.9	Lack of normal physiological development, unspecified	endocrine/metabolic											TRUE
374.2	Lagophthalmos	sense organs											TRUE
202.24	Large cell lymphoma	neoplasms											TRUE
1012	Late effect	NULL											TRUE
433.8	Late effects of cerebrovascular disease	circulatory system											TRUE
728.2	Laxity of ligament or hypermobility syndrome	musculoskeletal											TRUE
315.1	Learning disorder	mental disorders											TRUE
426.32	Left bundle branch block	circulatory system											TRUE
204	Leukemia	neoplasms											TRUE
528.6	Leukoplakia of oral mucosa	digestive											TRUE
214	Lipoma	neoplasms											TRUE
214.1	Lipoma of skin and subcutaneous tissue	neoplasms											TRUE
571.8	Liver abscess and sequelae of chronic liver disease	digestive											TRUE
573.2	Liver replaced by transplant	digestive											TRUE
278.3	Localized adiposity	endocrine/metabolic											TRUE
742.1	Loose body in joint	musculoskeletal											TRUE
737.2	Lordosis (acquired)	musculoskeletal											TRUE
525.1	Loss of teeth or edentulism	digestive											TRUE
754.1	Lumbosacral spondylolysis, congenital	congenital anomalies											TRUE
500	Lung disease due to external agents	respiratory											TRUE
510.2	Lung transplant	respiratory											TRUE
130.1	Lyme disease	infectious diseases											TRUE
204.1	Lymphoid leukemia	neoplasms											TRUE
204.11	Lymphoid leukemia, acute	neoplasms											TRUE
362.26	Macular puckering of retina	sense organs											TRUE
174.11	Malignant neoplasm of female breast	neoplasms											TRUE
189.11	Malignant neoplasm of kidney, except pelvis	neoplasms											TRUE
155.1	Malignant neoplasm of liver, primary	neoplasms											TRUE
184.11	Malignant neoplasm of ovary	neoplasms											TRUE
184.1	Malignant neoplasm of ovary and other uterine adnexa	neoplasms											TRUE
153.3	Malignant neoplasm of rectum, rectosigmoid junction, and anus	neoplasms											TRUE
159.4	Malignant neoplasm of retroperitoneum and peritoneum	neoplasms											TRUE
159.2	Malignant neoplasm of small intestine, including duodenum	neoplasms											TRUE
182	Malignant neoplasm of uterus	neoplasms											TRUE
195.1	Malignant neoplasm, other	neoplasms											TRUE
733.8	Malunion and nonunion of fracture	musculoskeletal											TRUE
611.11	Mammographic microcalcification	genitourinary											TRUE
191	Manlignant and unknown neoplasms of brain and nervous system	neoplasms											TRUE
381.3	Mastoiditis & related conditions	sense organs											TRUE
255.13	Medulloadrenal hyperfunction	endocrine/metabolic											TRUE
281.1	Megaloblastic anemia	hematopoietic											TRUE
172.11	Melanomas of skin	neoplasms											TRUE
292.3	Memory loss	mental disorders											TRUE
386.1	Meniere's disease	sense organs											TRUE
320	Meningitis	neurological											TRUE
627	Menopausal and postmenopausal disorders	genitourinary											TRUE
315.3	Mental retardation	mental disorders											TRUE
41.12	Methicillin resistant Staphylococcus aureus	infectious diseases											TRUE
41.11	Methicillin sensitive Staphylococcus aureus	infectious diseases											TRUE
292.2	Mild cognitive impairment	mental disorders											TRUE
634.1	Missed abortion/Hydatidiform mole	pregnancy complications											TRUE
394.2	Mitral valve disease	circulatory system											TRUE
394.1	Mitral valve stenosis and aortic valve stenosis	circulatory system											TRUE
626.21	Mittelschmerz	genitourinary											TRUE
426.22	Mobitz II AV block	circulatory system											TRUE
433.32	Moyamoya disease	circulatory system											TRUE
480.13	MRSA pneumonia	respiratory											TRUE
204.4	Multiple myeloma	neoplasms											TRUE
335	Multiple sclerosis	neurological											TRUE
840.1	Muscle/tendon sprain	injuries & poisonings											TRUE
728.1	Muscular calcification and ossification	musculoskeletal											TRUE
359.1	Muscular dystrophies	neurological											TRUE
772.1	Muscular wasting and disuse atrophy	symptoms											TRUE
771	Musculoskeletal symptoms referable to limbs	symptoms											TRUE
358.1	Myasthenia gravis	neurological											TRUE
117	Mycoses	infectious diseases											TRUE
204.2	Myeloid leukemia	neoplasms											TRUE
204.21	Myeloid leukemia, acute	neoplasms											TRUE
204.22	Myeloid leukemia, chronic	neoplasms											TRUE
411.2	Myocardial infarction	circulatory system											TRUE
420.1	Myocarditis	circulatory system											TRUE
333.2	Myoclonus	neurological											TRUE
358	Myoneural disorders	neurological											TRUE
359.2	Myopathy	neurological											TRUE
384.1	Myringitis	sense organs											TRUE
471	Nasal polyps	respiratory											TRUE
656.9	Neonatal bradycardia or tachycardia	pregnancy complications											TRUE
174.3	Neoplasm of uncertain behavior of breast	neoplasms											TRUE
158	Neoplasm of unspecified nature of digestive system	neoplasms											TRUE
580.31	Nephritis and nephropathy in diseases classified elsewhere	genitourinary											TRUE
580.32	Nephritis and nephropathy with pathological lesion	genitourinary											TRUE
580.3	Nephritis and nephropathy without mention of glomerulonephritis	genitourinary											TRUE
580.2	Nephrotic syndrome without mention of glomerulonephritis	genitourinary											TRUE
353.1	Nerve plexus lesions	neurological											TRUE
353	Nerve root and plexus disorders	neurological											TRUE
353.2	Nerve root lesions	neurological											TRUE
752	Nervous system congenital anomalies	congenital anomalies											TRUE
752.1	Neural tube defects	congenital anomalies											TRUE
766	Neuralgia, neuritis, and radiculitis NOS	symptoms											TRUE
209	Neuroendocrine tumors	neoplasms											TRUE
199.4	Neurofibromatosis	neoplasms											TRUE
292	Neurological disorders	mental disorders											TRUE
288.11	Neutropenia	hematopoietic											TRUE
202.21	Nodular lymphoma	neoplasms											TRUE
283.2	Non-autoimmune hemolytic anemias	hematopoietic											TRUE
875	Non-healing surgical wound	injuries & poisonings											TRUE
202.2	Non-Hodgkins lymphoma	neoplasms											TRUE
580.12	Non-proliferative glomerulonephritis	genitourinary											TRUE
769	Nonallopathic lesions NEC	symptoms											TRUE
371.33	Noninfectious dermatoses of eyelid	sense organs											TRUE
450	Noninfectious disorders of lymphatic channels	circulatory system											TRUE
395.2	Nonrheumatic aortic valve disorders	circulatory system											TRUE
395.4	Nonrheumatic pulmonary valve disorders	circulatory system											TRUE
395.3	Nonrheumatic tricuspid valve disorders	circulatory system											TRUE
366.1	Nonsenile Cataract	sense organs											TRUE
346.3	Nonspecific abnormal findings in cerebrospinal fluid	neurological											TRUE
575.9	Nonspecific abnormal findings on radiological and other examination of biliary tract	digestive											TRUE
793	Nonspecific abnormal findings on radiological and other examination of musculoskeletal system	symptoms											TRUE
346.1	Nonspecific abnormal findings on radiological and other examination of skull and head	neurological											TRUE
346.2	Nonspecific abnormal results of function study of brain and central nervous system	neurological											TRUE
259.1	Nonspecific abnormal results of other endocrine function study	endocrine/metabolic											TRUE
790	Nonspecific findings on examination of blood	symptoms											TRUE
729.7	Nontraumatic compartment syndrome	musculoskeletal											TRUE
260.22	Nutritional marasmus	endocrine/metabolic											TRUE
378.2	Nystagmus and other irregular eye movements	sense organs											TRUE
300.3	Obsessive-compulsive disorders	mental disorders											TRUE
496.21	Obstructive chronic bronchitis	respiratory											TRUE
751.3	Obstructive genitourinary defect	congenital anomalies											TRUE
433.1	Occlusion and stenosis of precerebral arteries	circulatory system											TRUE
433.2	Occlusion of cerebral arteries	circulatory system											TRUE
433.11	Occlusion of cerebral arteries, with cerebral infarction	circulatory system											TRUE
599.6	Oliguria and anuria	genitourinary											TRUE
870.2	Open wound of ear	injuries & poisonings											TRUE
871.3	Open wound of foot except toe(s) alone	injuries & poisonings											TRUE
870.8	Open wound of genital organs	injuries & poisonings											TRUE
871.1	Open wound of hand except finger(s)	injuries & poisonings											TRUE
870.5	Open wound of lip and mouth	injuries & poisonings											TRUE
870.6	Open wound of neck	injuries & poisonings											TRUE
870.4	Open wound of nose and sinus	injuries & poisonings											TRUE
871.4	Open wound of toe(s)	injuries & poisonings											TRUE
870.1	Open wound or laceration of eye or eyelid	injuries & poisonings											TRUE
871	Open wounds of extremities	injuries & poisonings											TRUE
365.1	Open-angle glaucoma	sense organs											TRUE
965.1	Opiates and related narcotics causing adverse effects in therapeutic use	injuries & poisonings											TRUE
377.1	Optic atrophy	sense organs											TRUE
377.3	Optic neuritis/neuropathy	sense organs											TRUE
528.12	Oral aphthae	digestive											TRUE
327.41	Organic or persistent insomnia	neurological											TRUE
513.32	Orthopnea	respiratory											TRUE
731	Osteitis deformans and osteopathies associated with other disorders classified elsewhere	musculoskeletal											TRUE
740.1	Osteoarthritis; localized	musculoskeletal											TRUE
740.3	Osteoarthrosis involving more than one site, but not specified as generalized	musculoskeletal											TRUE
740.9	Osteoarthrosis NOS	musculoskeletal											TRUE
740.2	Osteoarthrosis, generalized	musculoskeletal											TRUE
740.11	Osteoarthrosis, localized, primary	musculoskeletal											TRUE
740.12	Osteoarthrosis, localized, secondary	musculoskeletal											TRUE
732.7	Osteochondritis dissecans	musculoskeletal											TRUE
732	Osteochondropathies	musculoskeletal											TRUE
710	Osteomyelitis, periostitis, and other infections involving bone	musculoskeletal											TRUE
743.11	Osteoporosis NOS	musculoskeletal											TRUE
736	Other acquired deformities of limbs	musculoskeletal											TRUE
738	Other acquired musculoskeletal deformity	musculoskeletal											TRUE
411.9	Other acute and subacute forms of ischemic heart disease	circulatory system											TRUE
721.8	Other allied disorders of spine	musculoskeletal											TRUE
504	Other alveolar and parietoalveolar pneumonopathy	respiratory											TRUE
722.9	Other and unspecified disc disorder	musculoskeletal											TRUE
349	Other and unspecified disorders of the nervous system	neurological											TRUE
442	Other aneurysm	circulatory system											TRUE
716	Other arthropathies	musculoskeletal											TRUE
218.2	Other benign neoplasm of uterus	neoplasms											TRUE
426.8	Other cardiac conduction disorders	circulatory system											TRUE
598.4	Other cells and casts in urine	genitourinary											TRUE
331	Other cerebral degenerations	neurological											TRUE
411.8	Other chronic ischemic heart disease, unspecified	circulatory system											TRUE
324	Other CNS infection and poliomyelitis	neurological											TRUE
348	Other conditions of brain	neurological											TRUE
755.6	Other congenital anomalies of lower limb, including pelvic girdle	congenital anomalies											TRUE
756	Other congenital musculoskeletal anomalies	congenital anomalies											TRUE
277.6	Other deficiencies of circulating enzymes	endocrine/metabolic											TRUE
281	Other deficiency anemia	hematopoietic											TRUE
333.8	Other degenerative diseases of the basal ganglia	neurological											TRUE
341	Other demyelinating diseases of central nervous system	neurological											TRUE
510	Other diseases of lung	respiratory											TRUE
519.8	Other diseases of respiratory system, NEC	respiratory											TRUE
519	Other diseases of respiratory system, not elsewhere classified	respiratory											TRUE
447	Other disorders of arteries and arterioles	circulatory system											TRUE
596	Other disorders of bladder	genitourinary											TRUE
271.9	Other disorders of carbohydrate transport and metabolism	endocrine/metabolic											TRUE
723	Other disorders of cervical region	musculoskeletal											TRUE
459	Other disorders of circulatory system	circulatory system											TRUE
379	Other disorders of eye	sense organs											TRUE
575.7	Other disorders of gallbladder	digestive											TRUE
569	Other disorders of intestine	digestive											TRUE
277.5	Other disorders of lipoid metabolism	endocrine/metabolic											TRUE
608	Other disorders of male genital organs	genitourinary											TRUE
385	Other disorders of middle ear and mastoid	sense organs											TRUE
253.7	Other disorders of neurohypophysis	endocrine/metabolic											TRUE
251	Other disorders of pancreatic internal secretion	endocrine/metabolic											TRUE
568	Other disorders of peritoneum	digestive											TRUE
537	Other disorders of stomach and duodenum	digestive											TRUE
727	Other disorders of synovium, tendon, and bursa	musculoskeletal											TRUE
603	Other disorders of testis	genitourinary											TRUE
384	Other disorders of tympanic membrane	sense organs											TRUE
597	Other disorders of urethra and urinary tract	genitourinary											TRUE
426.25	Other heart block	circulatory system											TRUE
282.9	Other hereditary hemolytic anemias	hematopoietic											TRUE
425.12	Other hypertrophic cardiomyopathy	circulatory system											TRUE
715	Other inflammatory spondylopathies	musculoskeletal											TRUE
560.4	Other intestinal obstruction	digestive											TRUE
306	Other mental disorder	mental disorders											TRUE
172.2	Other non-epithelial cancer of skin	neoplasms											TRUE
362.3	Other nondiabetic retinopathy	sense organs											TRUE
613	Other nonmalignant breast conditions	genitourinary											TRUE
263	Other nutritional deficiency	endocrine/metabolic											TRUE
870.3	Other open wound of head and face	injuries & poisonings											TRUE
344	Other paralytic syndromes	neurological											TRUE
290.3	Other persistent mental disorders due to conditions classified elsewhere	mental disorders											TRUE
505	Other pulmonary inflamation or edema	respiratory											TRUE
1004	Other signs and symptoms involving emotional state	NULL											TRUE
610.8	Other specified benign mammary dysplasias	genitourinary											TRUE
751.22	Other specified congenital anomalies of kidney	congenital anomalies											TRUE
752.2	Other specified congenital anomalies of nervous system	congenital anomalies											TRUE
709.6	Other specified diffuse diseases of connective tissue	dermatologic											TRUE
527.8	Other specified diseases of the salivary glands	digestive											TRUE
279.8	Other specified disorders involving the immune mechanism	endocrine/metabolic											TRUE
613.8	Other specified disorders of breast	genitourinary											TRUE
270.38	Other specified disorders of plasma protein metabolism	endocrine/metabolic											TRUE
695.8	Other specified erythematous conditions	dermatologic											TRUE
535.8	Other specified gastritis	digestive											TRUE
743.13	Other specified osteoporosis	musculoskeletal											TRUE
443.8	Other specified peripheral vascular diseases	circulatory system											TRUE
842	Other sprains and strains	injuries & poisonings											TRUE
724.9	Other unspecified back disorders	musculoskeletal											TRUE
281.12	Other vitamin B12 deficiency anemia	hematopoietic											TRUE
381.9	Otorrhea	sense organs											TRUE
383	Otosclerosis	sense organs											TRUE
278	Overweight, obesity and other hyperalimentation	endocrine/metabolic											TRUE
716.8	Palindromic rheumatism	musculoskeletal											TRUE
782.6	Pallor and flushing	symptoms											TRUE
157	Pancreatic cancer	neoplasms											TRUE
284.1	Pancytopenia	hematopoietic											TRUE
729.3	Panniculitis	musculoskeletal											TRUE
473.3	Paralysis/spasm of vocal cords or larynx	respiratory											TRUE
560.1	Paralytic ileus	digestive											TRUE
378.5	Paralytic strabismus	sense organs											TRUE
295.2	Paranoid disorders	mental disorders											TRUE
270.32	Paraproteinemia	endocrine/metabolic											TRUE
696.2	Parapsoriasis	dermatologic											TRUE
327.5	Parasomnia	neurological											TRUE
332	Parkinson's disease	neurological											TRUE
427.1	Paroxysmal tachycardia, unspecified	circulatory system											TRUE
427.12	Paroxysmal ventricular tachycardia	circulatory system											TRUE
345.12	Partial epilepsy	neurological											TRUE
743.2	Pathologic fracture	musculoskeletal											TRUE
743.21	Pathologic fracture of vertebrae	musculoskeletal											TRUE
742.2	Pathological, developmental or recurrent dislocation	musculoskeletal											TRUE
756.2	Pectus and other congenital anomalies of ribs/sternum	congenital anomalies											TRUE
756.22	Pectus carinatum	congenital anomalies											TRUE
756.21	Pectus excavatum	congenital anomalies											TRUE
132.1	Pediculosis and phthirus infestation	infectious diseases											TRUE
614.3	Pelvic inflammatory disease (PID)	genitourinary											TRUE
695.22	Pemphigus and pemphigoid	dermatologic											TRUE
531.4	Peptic ulcer, site unspecified	digestive											TRUE
384.4	Perforation of tympanic membrane	sense organs											TRUE
522.5	Periapical abscess	digestive											TRUE
420.2	Pericarditis	circulatory system											TRUE
656.6	Perinatal disorders of digestive system	pregnancy complications											TRUE
656.8	Perinatal jaundice	pregnancy complications											TRUE
337.1	Peripheral autonomic neuropathy	neurological											TRUE
362.6	Peripheral retinal degenerations	sense organs											TRUE
443.9	Peripheral vascular disease, unspecified	circulatory system											TRUE
568.1	Peritoneal adhesions (postoperative) (postinfection)	digestive											TRUE
560.3	Peritoneal or intestinal adhesions	digestive											TRUE
567	Peritonitis and retroperitoneal infections	digestive											TRUE
281.11	Pernicious anemia	hematopoietic											TRUE
789.1	Persistent vomiting	symptoms											TRUE
301	Personality disorders	mental disorders											TRUE
313	Pervasive developmental disorders	mental disorders											TRUE
270.12	Phenylketonuria [PKU]	endocrine/metabolic											TRUE
451	Phlebitis and thrombophlebitis	circulatory system											TRUE
325	Phlebitis and thrombophlebitis of intracranial venous sinuses	neurological											TRUE
451.2	Phlebitis and thrombophlebitis of lower extremities	circulatory system											TRUE
300.13	Phobia	mental disorders											TRUE
379.51	Pigmentary iris degeneration	sense organs											TRUE
686.3	Pilonidal cyst	dermatologic											TRUE
253.5	Pituitary dwarfism	endocrine/metabolic											TRUE
253.2	Pituitary hypofunction	endocrine/metabolic											TRUE
696.3	Pityriasis	dermatologic											TRUE
727.8	Plica syndrome	musculoskeletal											TRUE
480.11	Pneumococcal pneumonia	respiratory											TRUE
480.3	Pneumonia due to fungus (mycoses)	respiratory											TRUE
501	Pneumonitis due to inhalation of food or vomitus	respiratory											TRUE
975	Poisoning by agents primarily acting on the smooth and skeletal muscles and respiratory system	injuries & poisonings											TRUE
964	Poisoning by agents primarily affecting blood constituents	injuries & poisonings											TRUE
976	Poisoning by agents primarily affecting skin & mucous membrane, ophthalmological, otorhinolaryngological, & dental drugs	injuries & poisonings											TRUE
972	Poisoning by agents primarily affecting the cardiovascular system	injuries & poisonings											TRUE
973	Poisoning by agents primarily affecting the gastrointestinal system	injuries & poisonings											TRUE
965	Poisoning by analgesics, antipyretics, and antirheumatics	injuries & poisonings											TRUE
960	Poisoning by antibiotics	injuries & poisonings											TRUE
966	Poisoning by anticonvulsants and anti-Parkinsonism drugs	injuries & poisonings											TRUE
971	Poisoning by drugs primarily affecting the autonomic nervous system	injuries & poisonings											TRUE
962	Poisoning by hormones and synthetic substitutes	injuries & poisonings											TRUE
961	Poisoning by other anti-infectives	injuries & poisonings											TRUE
963	Poisoning by primarily systemic agents	injuries & poisonings											TRUE
969	Poisoning by psychotropic agents	injuries & poisonings											TRUE
974	Poisoning by water, mineral, and uric acid metabolism drugs	injuries & poisonings											TRUE
446.6	Polyarteritis nodosa	circulatory system											TRUE
200.1	Polycythemia vera	neoplasms											TRUE
289.8	Polycythemia, secondary	hematopoietic											TRUE
276.8	Polydipsia	endocrine/metabolic											TRUE
717	Polymyalgia Rheumatica	musculoskeletal											TRUE
316.1	Polyneuropathy due to drugs	mental disorders											TRUE
250.6	Polyneuropathy in diabetes	endocrine/metabolic											TRUE
622	Polyp of female genital organs	genitourinary											TRUE
571.81	Portal hypertension	digestive											TRUE
258.1	Postablative ovarian failure	endocrine/metabolic											TRUE
502	Postinflammatory pulmonary fibrosis	respiratory											TRUE
627.3	Postmenopausal atrophic vaginitis	genitourinary											TRUE
627.1	Postmenopausal bleeding	genitourinary											TRUE
80	Postoperative infection	infectious diseases											TRUE
958.1	Postoperative shock	injuries & poisonings											TRUE
452.8	Postphlebitic syndrome	circulatory system											TRUE
783.1	Postprocedural fever	symptoms											TRUE
876	Posttraumatic wound infection not elsewhere classified	injuries & poisonings											TRUE
259.4	Precocious sexual development and puberty NEC	endocrine/metabolic											TRUE
627.4	Premenopausal menorrhagia	genitourinary											TRUE
626.4	Premenstrual tension syndromes	genitourinary											TRUE
367.4	Presbyopia	sense organs											TRUE
365.2	Primary angle-closure glaucoma	sense organs											TRUE
571.6	Primary biliary cirrhosis	digestive											TRUE
365.11	Primary open angle glaucoma	sense organs											TRUE
415.21	Primary pulmonary hypertension	circulatory system											TRUE
287.31	Primary thrombocytopenia	hematopoietic											TRUE
425.1	Primary/intrinsic cardiomyopathies	circulatory system											TRUE
360.2	Progressive myopia	sense organs											TRUE
618.5	Prolapse of vaginal vault after hysterectomy	genitourinary											TRUE
618.1	Prolapse of vaginal walls	genitourinary											TRUE
580.11	Proliferative glomerulonephritis	genitourinary											TRUE
260	Protein-calorie malnutrition	endocrine/metabolic											TRUE
131	Protozoan infection	infectious diseases											TRUE
696.4	Psoriasis	dermatologic											TRUE
696.42	Psoriatic arthropathy	dermatologic											TRUE
303	Psychogenic and somatoform disorders	mental disorders											TRUE
368.91	Psychophysical visual disturbances	sense organs											TRUE
295.3	Psychosis	mental disorders											TRUE
374.3	Ptosis of eyelid	sense organs											TRUE
508	Pulmonary collapse; interstitial and compensatory emphysema	respiratory											TRUE
503	Pulmonary congestion and hypostasis	respiratory											TRUE
415.11	Pulmonary embolism and infarction, acute	circulatory system											TRUE
415	Pulmonary heart disease	circulatory system											TRUE
509.3	Pulmonary insufficiency or respiratory failure following trauma and surgery	respiratory											TRUE
522.1	Pulpitis and necrosis of tooth pulp	digestive											TRUE
287	Purpura and other hemorrhagic conditions	hematopoietic											TRUE
686.5	Pyoderma	dermatologic											TRUE
711.1	Pyogenic arthritis	musculoskeletal											TRUE
686.4	Pyogenic granuloma	dermatologic											TRUE
287.4	Qualitative platelet defects	hematopoietic											TRUE
196	Radiotherapy	neoplasms											TRUE
555.1	Regional enteritis	digestive											TRUE
711.2	Reiter's disease	musculoskeletal											TRUE
585.31	Renal dialysis	genitourinary											TRUE
585.2	Renal failure NOS	genitourinary											TRUE
588.1	Renal osteodystrophy	genitourinary											TRUE
580.4	Renal sclerosis, NOS	genitourinary											TRUE
513	Respiratory abnormalities	respiratory											TRUE
509.5	Respiratory arrest	respiratory											TRUE
519.2	Respiratory complications	respiratory											TRUE
656.2	Respiratory conditions of fetus and newborn	pregnancy complications											TRUE
509.1	Respiratory failure	respiratory											TRUE
509	Respiratory failure, insufficiency, arrest	respiratory											TRUE
509.2	Respiratory insufficiency	respiratory											TRUE
327.71	Restless legs syndrome	neurological											TRUE
202.22	Reticulosarcoma	neoplasms											TRUE
361.1	Retinal detachment with retinal defect	sense organs											TRUE
361	Retinal detachments and defects	sense organs											TRUE
362.9	Retinal edema	sense organs											TRUE
362.8	Retinal hemorrhage/ischemia	sense organs											TRUE
362.4	Retinal vascular changes and abnomalities	sense organs											TRUE
362.1	Retinopathy of prematurity	sense organs											TRUE
361.2	Retinoschisis and retinal cysts	sense organs											TRUE
772.4	Rhabdomyolysis	symptoms											TRUE
394	Rheumatic disease of the heart valves	circulatory system											TRUE
41.21	Rheumatic fever / chorea	infectious diseases											TRUE
729.1	Rheumatism, unspecified and fibrositis	musculoskeletal											TRUE
714.1	Rheumatoid arthritis	musculoskeletal											TRUE
714	Rheumatoid arthritis and other inflammatory polyarthropathies	musculoskeletal											TRUE
261.41	Rickets or osteomalacia	endocrine/metabolic											TRUE
426.31	Right bundle branch block	circulatory system											TRUE
840.2	Rotator cuff (capsule) sprain	injuries & poisonings											TRUE
727.5	Rupture of synovium	musculoskeletal											TRUE
727.6	Rupture of tendon, nontraumatic	musculoskeletal											TRUE
715.1	Sacroiliitis NEC	musculoskeletal											TRUE
965.3	Salicylates causing adverse effects in therapeutic use	injuries & poisonings											TRUE
697	Sarcoidosis	dermatologic											TRUE
295.1	Schizophrenia	mental disorders											TRUE
722.3	Schmorl's nodes	musculoskeletal											TRUE
379.1	Scleritis and episcleritis	sense organs											TRUE
706.3	Seborrhea	dermatologic											TRUE
426.23	Second degree AV block	circulatory system											TRUE
249	Secondary diabetes mellitus	endocrine/metabolic											TRUE
588.2	Secondary hyperparathyroidism (of renal origin)	genitourinary											TRUE
198.6	Secondary malignancy of bone	neoplasms											TRUE
198.5	Secondary malignancy of brain/spine	neoplasms											TRUE
198.1	Secondary malignancy of lymph nodes	neoplasms											TRUE
198.2	Secondary malignancy of respiratory organs	neoplasms											TRUE
198	Secondary malignant neoplasm	neoplasms											TRUE
198.3	Secondary malignant neoplasm of digestive systems	neoplasms											TRUE
198.4	Secondary malignant neoplasm of liver	neoplasms											TRUE
425.2	Secondary/extrinsic cardiomyopathies	circulatory system											TRUE
366.2	Senile cataract	sense organs											TRUE
389.1	Sensorineural hearing loss	sense organs											TRUE
362.31	Separation of retinal layers	sense organs											TRUE
994.21	Septic shock	injuries & poisonings											TRUE
260.2	severe protein-calorie malnutrition	endocrine/metabolic											TRUE
302	Sexual and gender identity disorders	mental disorders											TRUE
90	Sexually transmitted infections (not HIV or hepatitis)	infectious diseases											TRUE
797	Shock	symptoms											TRUE
264.1	Short stature	endocrine/metabolic											TRUE
527.2	Sialoadenitis	digestive											TRUE
528.7	Sialolithiasis	digestive											TRUE
709.2	Sicca syndrome	dermatologic											TRUE
282.5	Sickle cell anemia	hematopoietic											TRUE
427.8	Sinoatrial node dysfunction (Bradycardia)	circulatory system											TRUE
327.72	Sleep related leg cramps	neurological											TRUE
327.7	Sleep related movement disorders	neurological											TRUE
586.11	Small kidney	genitourinary											TRUE
514.2	Solitary pulmonary nodule	respiratory											TRUE
303.4	Somatoform disorder	mental disorders											TRUE
291.4	Specific nonpsychotic mental disorders due to brain damage	mental disorders											TRUE
315.2	Speech and language disorder	mental disorders											TRUE
752.11	Spina bifida	congenital anomalies											TRUE
952	Spinal cord injury without evidence of spinal bone injury	injuries & poisonings											TRUE
720	Spinal stenosis	musculoskeletal											TRUE
720.1	Spinal stenosis of lumbar region	musculoskeletal											TRUE
334.1	Spinocerebellar disease	neurological											TRUE
130	Spirochetal infection	infectious diseases											TRUE
579.2	Splenomegaly	digestive											TRUE
754.2	Spondylolisthesis, congenital	congenital anomalies											TRUE
721.2	Spondylosis with myelopathy	musculoskeletal											TRUE
287.1	Spontaneous ecchymoses	hematopoietic											TRUE
172.22	Squamous cell carcinoma	neoplasms											TRUE
41.1	Staphylococcus infections	infectious diseases											TRUE
741.2	Stiffness of joint	musculoskeletal											TRUE
528.1	Stomatitis and mucositis	digestive											TRUE
528.11	Stomatitis and mucositis (ulcerative)	digestive											TRUE
378.1	Strabismus (not specified as paralytic)	sense organs											TRUE
378	Strabismus and other disorders of binocular eye movements	sense organs											TRUE
743.4	Stress fracture	musculoskeletal											TRUE
530.3	Stricture and stenosis of esophagus	digestive											TRUE
447.1	Stricture of artery	circulatory system											TRUE
586.4	Stricture/obstruction of ureter	genitourinary											TRUE
430.1	Subarachnoid hemorrhage	circulatory system											TRUE
818.2	Subarachnoid hemorrhage (injury)	injuries & poisonings											TRUE
430.3	Subdural hemorrhage	circulatory system											TRUE
297	Suicidal ideation or attempt	mental disorders											TRUE
297.2	Suicide or self-inflicted injury	mental disorders											TRUE
910	Superficial injury, infected	injuries & poisonings											TRUE
370.2	Superficial keratitis	sense organs											TRUE
427.61	Supraventricular premature beats	circulatory system											TRUE
292.12	Symbolic dysfunction	mental disorders											TRUE
627.2	Symptomatic menopause	genitourinary											TRUE
741	Symptoms and disorders of the joints	musculoskeletal											TRUE
293	Symptoms involving head and neck	mental disorders											TRUE
781	Symptoms involving nervous and musculoskeletal systems	symptoms											TRUE
519.9	Symptoms involving respiratory system and other chest symptoms	respiratory											TRUE
726.2	Synoviopathy	musculoskeletal											TRUE
994.1	Systemic inflammatory response syndrome (SIRS)	injuries & poisonings											TRUE
709.3	Systemic sclerosis	dermatologic											TRUE
446.7	Takayasu's disease	circulatory system											TRUE
704.12	Telogen effluvium	dermatologic											TRUE
526.41	Temporomandibular joint disorder, unspecified	digestive											TRUE
526.4	Temporomandibular joint disorders	digestive											TRUE
446.8	Thrombotic microangiopathy	circulatory system											TRUE
193	Thyroid cancer	neoplasms											TRUE
246.2	Thyroid cyst	endocrine/metabolic											TRUE
245	Thyroiditis	endocrine/metabolic											TRUE
245.1	Thyroiditis, acute and subacute	endocrine/metabolic											TRUE
333.3	Tics and choreas	neurological											TRUE
313.2	Tics and stuttering	mental disorders											TRUE
521.4	Tooth complications likely association with other diseases	digestive											TRUE
333.4	Torsion dystonia	neurological											TRUE
723.1	Torticollis	musculoskeletal											TRUE
981	Toxic effect of (non-ethyl) alcohol and petroleum and other solvents	injuries & poisonings											TRUE
986	Toxic effect of carbon monoxide	injuries & poisonings											TRUE
983	Toxic effect of corrosive aromatics, acids, and caustic alkalis	injuries & poisonings											TRUE
988	Toxic effect of noxious substances eaten as food	injuries & poisonings											TRUE
987	Toxic effect of other gases, fumes, or vapors	injuries & poisonings											TRUE
985	Toxic effect of other metals	injuries & poisonings											TRUE
989	Toxic effect of other substances, chiefly nonmedicinal as to source	injuries & poisonings											TRUE
913	Toxic effect of venom	injuries & poisonings											TRUE
695.1	Toxic erythema	dermatologic											TRUE
569.1	Toxic gastroenteritis and colitis	digestive											TRUE
362.5	Toxic maculopathy of retina	sense organs											TRUE
242.2	Toxic multinodular goiter	endocrine/metabolic											TRUE
519.1	Tracheostomy complications	respiratory											TRUE
292.5	Transient alteration of awareness	mental disorders											TRUE
433.31	Transient cerebral ischemia	circulatory system											TRUE
656.26	Transitory tachypnea or apnea of newborn	pregnancy complications											TRUE
872	Traumatic amputation	injuries & poisonings											TRUE
958.2	Traumatic and surgical subcutaneous emphysema	injuries & poisonings											TRUE
836	Traumatic arthropathy	injuries & poisonings											TRUE
352.1	Trigeminal nerve disorders [CN5]	neurological											TRUE
385.5	Tympanosclerosis and middle ear disease related to otitis media	sense organs											TRUE
250.11	Type 1 diabetes with ketoacidosis	endocrine/metabolic											TRUE
250.14	Type 1 diabetes with neurological manifestations	endocrine/metabolic											TRUE
250.13	Type 1 diabetes with ophthalmic manifestations	endocrine/metabolic											TRUE
250.12	Type 1 diabetes with renal manifestations	endocrine/metabolic											TRUE
250.21	Type 2 diabetes with ketoacidosis	endocrine/metabolic											TRUE
250.24	Type 2 diabetes with neurological manifestations	endocrine/metabolic											TRUE
250.23	Type 2 diabetes with ophthalmic manifestations	endocrine/metabolic											TRUE
250.22	Type 2 diabetes with renal manifestations	endocrine/metabolic											TRUE
530.12	Ulcer of esophagus	digestive											TRUE
556.1	Ulceration of intestine	digestive											TRUE
556	Ulceration of the lower GI tract	digestive											TRUE
555.2	Ulcerative colitis	digestive											TRUE
555.21	Ulcerative colitis (chronic)	digestive											TRUE
736.6	Unequal leg length (acquired)	musculoskeletal											TRUE
272.9	Unspecified disorder of lipoid metabolism	endocrine/metabolic											TRUE
695.9	Unspecified erythematous condition	dermatologic											TRUE
716.2	Unspecified monoarthritis	musculoskeletal											TRUE
710.19	Unspecified osteomyelitis	musculoskeletal											TRUE
716.1	Unspecified polyarthropathy or polyarthritis	musculoskeletal											TRUE
411.1	Unstable angina (intermediate coronary syndrome)	circulatory system											TRUE
599.7	Urethral discharge	genitourinary											TRUE
597.8	Urethral hypermobility/ISD	genitourinary											TRUE
597.1	Urethral stricture (not specified as infectious)	genitourinary											TRUE
592.21	Urethral syndrome	genitourinary											TRUE
592.2	Urethritis and urethral syndrome	genitourinary											TRUE
594	Urinary calculus	genitourinary											TRUE
597.2	Urinary complications NEC	genitourinary											TRUE
599.1	Urinary obstruction	genitourinary											TRUE
618.2	Uterine/Uterovaginal prolapse	genitourinary											TRUE
371.1	Uveitis, noninfectious or NOS	sense organs											TRUE
618.6	Vaginal enterocele, congenital or acquired	genitourinary											TRUE
747.12	Valvular heart disease/ heart chambers	congenital anomalies											TRUE
79.1	Varicella infection	infectious diseases											TRUE
454	Varicose veins	circulatory system											TRUE
454.1	Varicose veins of lower extremity	circulatory system											TRUE
454.11	Varicose veins of lower extremity, symptomtic	circulatory system											TRUE
856	Vascular complications of surgery and medical procedures	injuries & poisonings											TRUE
586.3	Vascular disorders of kidney/hypertrophy	genitourinary											TRUE
694.3	Vascular disorders of skin	dermatologic											TRUE
217	Vascular hamartomas and non-neoplastic nevi	neoplasms											TRUE
441	Vascular insufficiency of intestine	circulatory system											TRUE
90.3	Venereal diseases due to Chlamydia trachomatis	infectious diseases											TRUE
550.5	Ventral hernia	digestive											TRUE
427.41	Ventricular fibrillation and flutter	circulatory system											TRUE
386	Vertiginous syndromes and other disorders of vestibular system	sense organs											TRUE
586.12	Vesicoureteral reflux	genitourinary											TRUE
741.6	Villonodular synovitis	musculoskeletal											TRUE
8.6	Viral Enteritis	infectious diseases											TRUE
70	Viral hepatitis	infectious diseases											TRUE
70.1	Viral hepatitis A	infectious diseases											TRUE
70.3	Viral hepatitis C	infectious diseases											TRUE
480.2	Viral pneumonia	respiratory											TRUE
368.4	Visual field defects	sense organs											TRUE
261.1	Vitamin A deficiency	endocrine/metabolic											TRUE
261	Vitamin deficiency	endocrine/metabolic											TRUE
694.1	Vitiligo	dermatologic											TRUE
286.11	Von willebrand's disease	hematopoietic											TRUE
446.4	Wegener's granulomatosis	circulatory system											TRUE

## Sheet: Stanford 35+ results
phecode	phenotype	category	rpl_count	control_count	rpl_prop	control_prop	odds_ratio_crude	p_value_crude	adj_p_value_crude	odds_ratio_w_age_re	p_value_w_age_re	adj_p_value_w_age_re	count_under10
785	Abdominal pain	symptoms	613	1683	0.248985	0.157643	1.77151	1.56488e-26	1.01717e-24	1.82977	7.19494e-28	4.88005e-26	FALSE
286.9	Abnormal coagulation profile	hematopoietic	11	12	0.00446791	0.00112402	3.9883	0.000935305	0.00878962	3.94869	0.00137838	0.013696	FALSE
426.7	Abnormal electrocardiogram [ECG] [EKG]	circulatory system	54	150	0.0219334	0.0140502	1.57365	0.00467686	0.0355898	1.57597	0.00541058	0.0422025	FALSE
514	Abnormal findings examination of lungs	respiratory	24	92	0.00974817	0.00861746	1.1325	0.589001	0.958804	1.12849	0.607902	1	FALSE
564.8	Abnormal findings on exam of gastrointestinal tract/ abdominal area	digestive	16	41	0.00649878	0.00384039	1.69675	0.0737001	0.301764	1.66412	0.0907723	0.361237	FALSE
611	Abnormal findings on mammogram or breast exam	genitourinary	15	13	0.00609261	0.00121768	5.02798	2.09438e-05	0.000305349	3.18933	0.00283294	0.0244824	FALSE
396	Abnormal heart sounds	circulatory system	28	62	0.0113729	0.00580742	1.96936	0.00305606	0.0249605	1.95888	0.00406525	0.0332031	FALSE
350.1	Abnormal involuntary movements	neurological	24	56	0.00974817	0.00524541	1.86687	0.0108359	0.0704333	1.87964	0.0113482	0.0775106	FALSE
611.1	Abnormal mammogram	genitourinary	70	127	0.0284322	0.0118958	2.43077	3.66119e-09	7.93257e-08	1.98337	9.76634e-06	0.000173131	FALSE
792	Abnormal Papanicolaou smear of cervix and cervical HPV	genitourinary	72	246	0.0292445	0.0230423	1.27727	0.0717311	0.299185	1.29444	0.0625316	0.280314	FALSE
573.7	Abnormal results of function study of liver	digestive	14	44	0.00568643	0.00412139	1.38191	0.293098	0.715578	1.32457	0.371391	0.844257	FALSE
246.7	Abnormal results of function study of thyroid	endocrine/metabolic	39	51	0.0158408	0.00477707	3.35328	1.54571e-08	3.21507e-07	3.22532	8.80025e-08	1.90672e-06	FALSE
655.1	Abnormality in fetal heart rate or rhythm	pregnancy complications	179	2663	0.0727051	0.249438	0.235923	1.70234e-71	3.79378e-69	0.245825	3.0527e-66	6.80316e-64	FALSE
654.1	Abnormality of organs and soft tissues of pelvis complicating pregnancy, childbirth, or the puerperium	pregnancy complications	318	3099	0.129163	0.290277	0.362642	5.38548e-57	8.40135e-55	0.346175	8.39668e-60	1.45543e-57	FALSE
626.11	Absent or infrequent menstruation	genitourinary	452	819	0.183591	0.0767141	2.70647	2.0971e-55	2.97407e-53	2.63797	6.42721e-50	8.35538e-48	FALSE
706.1	Acne	dermatologic	127	325	0.0515841	0.0304421	1.73227	2.91455e-07	5.61321e-06	1.68228	2.10827e-06	4.06037e-05	FALSE
244.2	Acquired hypothyroidism	endocrine/metabolic	101	287	0.0410236	0.0268827	1.54852	0.000208527	0.00242763	1.49526	0.000835162	0.00917502	FALSE
483	Acute bronchitis and bronchiolitis	respiratory	58	150	0.0235581	0.0140502	1.69303	0.000753316	0.00725416	1.63521	0.00212289	0.0197746	FALSE
498	Acute bronchospasm	respiratory	14	28	0.00568643	0.00262271	2.17484	0.0178803	0.106463	1.99623	0.0394724	0.19868	FALSE
592.11	Acute cystitis	genitourinary	80	213	0.0324939	0.0199513	1.64978	0.000168593	0.00200767	1.65785	0.00020986	0.00272818	FALSE
535.1	Acute gastritis	digestive	11	24	0.00446791	0.00224803	1.99191	0.0588956	0.258809	2.23607	0.03153	0.168448	FALSE
338.1	Acute pain	neurological	83	235	0.0337124	0.022012	1.55009	0.00072564	0.00707499	1.54467	0.00105608	0.011079	FALSE
465.2	Acute pharyngitis	respiratory	164	455	0.0666125	0.042619	1.60316	5.08234e-07	9.43862e-06	1.57031	2.7578e-06	5.12164e-05	FALSE
285.1	Acute posthemorrhagic anemia	hematopoietic	46	351	0.018684	0.0328775	0.560072	0.000253103	0.00286116	0.560858	0.000314495	0.00386309	FALSE
300.8	Acute reaction to stress	mental disorders	14	34	0.00568643	0.00318471	1.79003	0.0674075	0.288098	1.88632	0.0518862	0.243803	FALSE
464	Acute sinusitis	respiratory	115	244	0.04671	0.022855	2.0949	1.46984e-10	3.52761e-09	1.97969	8.02975e-09	1.84212e-07	FALSE
465	Acute upper respiratory infections of multiple or unspecified sites	respiratory	201	623	0.0816409	0.0583552	1.43451	1.90664e-05	0.000283272	1.42233	4.40684e-05	0.00065473	FALSE
304	Adjustment reaction	mental disorders	77	184	0.0312754	0.0172349	1.84095	9.21174e-06	0.000145155	1.76765	4.93662e-05	0.000726521	FALSE
300.12	Agorophobia, social phobia, and panic disorder	mental disorders	34	93	0.0138099	0.00871113	1.59351	0.0208649	0.120553	1.75001	0.00670894	0.0505601	FALSE
317.1	Alcoholism	mental disorders	10	29	0.00406174	0.00271637	1.4973	0.2719	0.715578	1.69582	0.160043	0.525616	FALSE
371.21	Allergic conjunctivitis	sense organs	18	41	0.00731113	0.00384039	1.9104	0.0224771	0.125869	1.96806	0.0197141	0.120521	FALSE
476	Allergic rhinitis	respiratory	195	501	0.0792039	0.0469277	1.74695	1.85851e-10	4.39285e-09	1.66149	1.53349e-08	3.46702e-07	FALSE
949	Allergies, other	injuries & poisonings	58	147	0.0235581	0.0137692	1.72808	0.000481577	0.00508416	1.64286	0.0019676	0.0187162	FALSE
704.1	Alopecia	dermatologic	79	156	0.0320877	0.0146122	2.2356	8.97903e-09	1.91881e-07	2.07057	4.48798e-07	9.52204e-06	FALSE
110.12	Althete's foot	infectious diseases	12	34	0.00487409	0.00318471	1.53306	0.204208	0.603341	1.4351	0.293198	0.744933	FALSE
565	Anal and rectal conditions	digestive	44	109	0.0178716	0.0102098	1.76409	0.00161566	0.0143206	1.8712	0.000629164	0.00707623	FALSE
644	Anemia during pregnancy	pregnancy complications	132	1244	0.0536149	0.116523	0.429538	3.52069e-19	1.30769e-17	0.432689	2.06566e-18	8.70929e-17	FALSE
635.2	Antepartum hemorrhage, abruptio placentae, and placenta previa	pregnancy complications	295	1124	0.119821	0.105283	1.15689	0.0363008	0.175323	1.15807	0.0389773	0.198061	FALSE
300.1	Anxiety disorder	mental disorders	227	828	0.0922015	0.0775571	1.208	0.0160737	0.0971899	1.16321	0.0608285	0.27505	FALSE
427.5	Arrhythmia (cardiac) NOS	circulatory system	15	86	0.00609261	0.00805545	0.75484	0.31638	0.743104	0.730233	0.26942	0.711159	FALSE
526.42	Arthralgia/ankylosis of temporomandibular joint	digestive	13	17	0.00528026	0.00159236	3.3283	0.00112338	0.0101888	3.36958	0.00143194	0.0140492	FALSE
572	Ascites (non malignant)	digestive	10	35	0.00406174	0.00327838	1.23992	0.549458	0.958804	1.375	0.38464	0.861329	FALSE
495	Asthma	respiratory	160	667	0.0649878	0.0624766	1.04299	0.643753	0.958804	1.00202	0.982702	1	FALSE
495.2	Asthma with exacerbation	respiratory	48	143	0.0194963	0.0133945	1.4646	0.0233986	0.128982	1.36014	0.0739	0.316714	FALSE
367.2	Astigmatism	sense organs	21	145	0.00852965	0.0135819	0.624817	0.0449646	0.208145	0.618576	0.0425057	0.210504	FALSE
939	Atopic/contact dermatitis due to other or unspecified	dermatologic	197	602	0.0800162	0.0563882	1.45547	1.08488e-05	0.000169242	1.42378	5.03002e-05	0.000733349	FALSE
535.2	Atrophic gastritis	digestive	14	40	0.00568643	0.00374672	1.52067	0.178208	0.544041	1.395	0.295606	0.748611	FALSE
313.1	Attention deficit hyperactivity disorder	mental disorders	19	60	0.0077173	0.00562008	1.37607	0.226936	0.655594	1.3206	0.301985	0.758611	FALSE
760	Back pain	symptoms	229	820	0.0930138	0.0768078	1.23263	0.00758204	0.0515672	1.23113	0.00940713	0.0670097	FALSE
8.5	Bacterial enteritis	infectious diseases	22	32	0.00893582	0.00299738	2.99908	7.72832e-05	0.00101312	3.01511	0.000121741	0.00165145	FALSE
41	Bacterial infection NOS	infectious diseases	67	178	0.0272136	0.0166729	1.64989	0.000559291	0.00577811	1.6747	0.000538758	0.00627211	FALSE
172.21	Basal cell carcinoma	neoplasms	10	18	0.00406174	0.00168602	2.41481	0.0256335	0.137417	1.80295	0.144535	0.490163	FALSE
610.4	Benign neoplasm of breast	genitourinary	26	84	0.0105605	0.00786812	1.34584	0.187873	0.57131	1.36528	0.175939	0.556244	FALSE
208	Benign neoplasm of colon	neoplasms	10	31	0.00406174	0.00290371	1.40044	0.355324	0.806849	1.16411	0.683713	1	FALSE
220	Benign neoplasm of ovary	neoplasms	20	68	0.00812348	0.00636943	1.27764	0.337315	0.778418	1.2516	0.389379	0.864823	FALSE
227.3	Benign neoplasm of pituitary gland and craniopharyngeal duct (pouch)	neoplasms	19	28	0.0077173	0.00262271	2.9576	0.000274833	0.00304071	3.33423	7.82331e-05	0.00109949	FALSE
216	Benign neoplasm of skin	neoplasms	198	527	0.0804224	0.0493631	1.68423	1.69874e-09	3.78576e-08	1.62124	6.67504e-08	1.48758e-06	FALSE
296.1	Bipolar	mental disorders	26	75	0.0105605	0.0070251	1.50863	0.0721681	0.299185	1.34713	0.203507	0.609349	FALSE
578.2	Blood in stool	digestive	22	46	0.00893582	0.00430873	2.08357	0.00478202	0.0362134	2.05367	0.00712879	0.0532101	FALSE
497	Bronchitis	respiratory	20	47	0.00812348	0.0044024	1.85216	0.0214183	0.122242	1.89633	0.0195848	0.120521	FALSE
726.3	Bursitis	musculoskeletal	13	16	0.00528026	0.00149869	3.53665	0.000733102	0.00710335	3.17769	0.00240923	0.0218512	FALSE
574.2	Calculus of bile duct	digestive	10	38	0.00406174	0.00355939	1.14171	0.709782	0.958804	1.17364	0.659009	1	FALSE
594.1	Calculus of kidney	genitourinary	25	74	0.0101543	0.00693143	1.46974	0.0975463	0.36318	1.38746	0.168174	0.542048	FALSE
112	Candidiasis	infectious diseases	115	359	0.04671	0.0336268	1.40813	0.00178474	0.0154677	1.35015	0.00752103	0.0556057	FALSE
686.1	Carbuncle and furuncle	dermatologic	24	197	0.00974817	0.0184526	0.523638	0.00291636	0.0239448	0.526186	0.00347064	0.0289529	FALSE
747	Cardiac and circulatory congenital anomalies	congenital anomalies	11	57	0.00446791	0.00533908	0.8361	0.587606	0.958804	0.810526	0.531887	0.999692	FALSE
747.1	Cardiac congenital anomalies	congenital anomalies	18	88	0.00731113	0.00824279	0.88614	0.64155	0.958804	0.902741	0.696692	1	FALSE
747.11	Cardiac shunt/ heart septal defect	congenital anomalies	18	83	0.00731113	0.00777445	0.939966	0.812476	0.958804	0.918917	0.749136	1	FALSE
557.1	Celiac disease	digestive	15	32	0.00609261	0.00299738	2.03898	0.0231482	0.128054	1.87696	0.0481863	0.232008	FALSE
681.1	Cellulitis and abscess of fingers/toes	dermatologic	14	50	0.00568643	0.0046834	1.21539	0.519992	0.951194	1.15962	0.630229	1	FALSE
681.5	Cellulitis and abscess of leg, except foot	dermatologic	11	17	0.00446791	0.00159236	2.81395	0.00760285	0.0515672	3.13755	0.00403371	0.0331189	FALSE
681.7	Cellulitis and abscess of trunk	dermatologic	17	43	0.00690496	0.00402773	1.71932	0.0593193	0.259938	1.7333	0.0618517	0.278065	FALSE
636.8	Cervical incompetence	pregnancy complications	63	91	0.025589	0.00852379	3.05464	1.4858e-11	3.73846e-10	3.08059	3.26497e-11	8.9357e-10	FALSE
180.3	Cervical intraepithelial neoplasia [CIN] [Cervical dysplasia]	neoplasms	59	134	0.0239643	0.0125515	1.9316	3.04341e-05	0.000435571	1.94027	3.96569e-05	0.000606517	FALSE
765	Cervical radiculitis	symptoms	23	42	0.009342	0.00393406	2.38761	0.00083015	0.00789654	1.95198	0.0123749	0.0828532	FALSE
761	Cervicalgia	symptoms	104	299	0.0422421	0.0280067	1.5307	0.000245665	0.00279736	1.45372	0.00166048	0.0159898	FALSE
614.51	Cervicitis and endocervicitis	genitourinary	59	130	0.0239643	0.0121768	1.99179	1.39532e-05	0.000213402	1.91978	5.76453e-05	0.000832655	FALSE
574.1	Cholelithiasis	digestive	24	122	0.00974817	0.0114275	0.851598	0.474131	0.951194	0.826441	0.40456	0.887643	FALSE
574.12	Cholelithiasis with other cholecystitis	digestive	10	53	0.00406174	0.00496441	0.817431	0.559575	0.958804	0.81558	0.562903	1	FALSE
575.6	Cholesterolosis of gallbladder	digestive	10	27	0.00406174	0.00252904	1.60851	0.19997	0.598759	1.68264	0.169552	0.542163	FALSE
758.1	Chromosomal anomalies	congenital anomalies	51	101	0.0207149	0.00946047	2.21479	4.44419e-06	7.37546e-05	2.09293	3.37013e-05	0.000533612	FALSE
614.32	Chronic inflammatory pelvic disease	genitourinary	16	20	0.00649878	0.00187336	3.4852	0.000203932	0.00239198	3.07311	0.00106354	0.011079	FALSE
245.21	Chronic lymphocytic thyroiditis	endocrine/metabolic	80	174	0.0324939	0.0162982	2.02708	2.48829e-07	4.85216e-06	1.8997	4.61194e-06	8.46426e-05	FALSE
338.2	Chronic pain	neurological	117	409	0.0475223	0.0383102	1.25246	0.0359314	0.174078	1.1688	0.155619	0.513248	FALSE
472	Chronic pharyngitis and nasopharyngitis	respiratory	20	44	0.00812348	0.00412139	1.979	0.0116554	0.0742885	1.80468	0.0337421	0.177231	FALSE
475	Chronic sinusitis	respiratory	57	125	0.0231519	0.0117085	2.00052	1.74031e-05	0.000261047	1.94153	5.97418e-05	0.000855021	FALSE
474.2	Chronic tonsillitis and adenoiditis	respiratory	12	42	0.00487409	0.00393406	1.24012	0.51187	0.951194	1.24855	0.506936	0.97632	FALSE
286.3	Coagulation defects complicating pregnancy or postpartum	hematopoietic	83	568	0.0337124	0.0532034	0.62087	6.83603e-05	0.00091147	0.595979	2.03496e-05	0.000337716	FALSE
669	Complications of labor and delivery NEC	pregnancy complications	137	1271	0.0556458	0.119052	0.436024	3.89286e-19	1.41229e-17	0.442519	3.88306e-18	1.5144e-16	FALSE
1011	Complications of surgical and medical procedures	NULL	28	126	0.0113729	0.0118022	0.963206	0.85841	0.958804	0.96018	0.849292	1	FALSE
751.11	Congenital anomalies of female genital organs	congenital anomalies	79	107	0.0320877	0.0100225	3.27456	2.68615e-15	8.3808e-14	3.28478	1.21191e-14	3.85833e-13	FALSE
691	Congenital anomalies of skin	dermatologic	12	19	0.00487409	0.00177969	2.74724	0.00622529	0.0436664	2.70694	0.00782711	0.0575957	FALSE
369.5	Conjunctivitis, infectious	sense organs	45	134	0.0182778	0.0125515	1.46472	0.028059	0.147878	1.4143	0.050615	0.24073	FALSE
563	Constipation	digestive	123	422	0.0499594	0.0395279	1.27778	0.0195679	0.114759	1.31718	0.0101551	0.0710399	FALSE
916	Contusion	injuries & poisonings	38	136	0.0154346	0.0127389	1.21493	0.292282	0.715578	1.20388	0.325318	0.787618	FALSE
345.3	Convulsions	neurological	10	31	0.00406174	0.00290371	1.40044	0.355324	0.806849	1.54207	0.24004	0.672283	FALSE
700	Corns and callosities	dermatologic	15	24	0.00609261	0.00224803	2.72068	0.00241441	0.0202499	2.95379	0.00128301	0.0128301	FALSE
512.8	Cough	respiratory	198	606	0.0804224	0.0567628	1.45327	1.11922e-05	0.00017287	1.41536	6.59192e-05	0.000934853	FALSE
610.1	Cystic mastopathy	genitourinary	52	135	0.021121	0.0126452	1.68475	0.00154666	0.0137873	1.53369	0.0114023	0.0775106	FALSE
592.1	Cystitis	genitourinary	21	40	0.00852965	0.00374672	2.28755	0.00221286	0.0187612	2.46085	0.00124105	0.0125717	FALSE
452.2	Deep vein thrombosis [DVT]	circulatory system	10	44	0.00406174	0.00412139	0.985466	0.966734	0.972343	0.921752	0.819692	1	FALSE
722.6	Degeneration of intervertebral disc	musculoskeletal	19	49	0.0077173	0.00458973	1.68673	0.0538832	0.242241	1.47327	0.162495	0.53143	FALSE
296.2	Depression	mental disorders	86	218	0.034931	0.0204196	1.73638	1.99063e-05	0.000292961	1.66731	0.000117278	0.00160486	FALSE
110.2	Dermatomycoses	infectious diseases	17	48	0.00690496	0.00449607	1.5395	0.127529	0.437095	1.46263	0.18864	0.580431	FALSE
110.11	Dermatophytosis of nail	infectious diseases	24	66	0.00974817	0.00618209	1.58252	0.0552127	0.247505	1.50114	0.0962533	0.376329	FALSE
110.13	Dermatophytosis of the body	infectious diseases	14	32	0.00568643	0.00299738	1.90227	0.0452954	0.209056	1.90817	0.0497562	0.238097	FALSE
649.1	Diabetes or abnormal glucose tolerance complicating pregnancy	pregnancy complications	236	2326	0.095857	0.217872	0.380595	1.1526e-40	9.46342e-39	0.376653	5.08733e-40	4.40902e-38	FALSE
561.1	Diarrhea	digestive	97	268	0.0393989	0.025103	1.59284	0.000114305	0.00144972	1.58481	0.000191061	0.00252589	FALSE
704	Diseases of hair and hair follicles	dermatologic	27	57	0.0109667	0.00533908	2.06573	0.0019944	0.0170014	1.92264	0.00643456	0.0489654	FALSE
703	Diseases of nail, NOS	dermatologic	15	50	0.00609261	0.0046834	1.30274	0.370381	0.807966	1.26434	0.435342	0.910652	FALSE
526	Diseases of the jaws	digestive	10	21	0.00406174	0.00196703	2.06925	0.0588296	0.258809	2.318	0.0323092	0.171397	FALSE
528	Diseases of the oral soft tissues, excluding lesions specific for gingiva and tongue	digestive	21	37	0.00852965	0.00346572	2.47372	0.000953371	0.00885274	2.34283	0.00252264	0.0224875	FALSE
830	Dislocation	injuries & poisonings	15	42	0.00609261	0.00393406	1.55205	0.145021	0.469654	1.42617	0.249205	0.683509	FALSE
689	Disorder of skin and subcutaneous tissue NOS	dermatologic	69	199	0.028026	0.0186399	1.51806	0.00318369	0.0258675	1.4445	0.011197	0.0769486	FALSE
277.4	Disorders of bilirubin excretion	endocrine/metabolic	12	13	0.00487409	0.00121768	4.01746	0.000523543	0.00544484	4.19488	0.000413742	0.00492701	FALSE
372	Disorders of conjunctiva	sense organs	17	49	0.00690496	0.00458973	1.50794	0.145774	0.469654	1.3439	0.30441	0.763106	FALSE
626	Disorders of menstruation and other abnormal bleeding from female genital tract	genitourinary	287	305	0.116572	0.0285688	4.48687	6.29997e-69	1.22849e-66	4.48014	3.669e-65	7.15454e-63	FALSE
728	Disorders of muscle, ligament, and fascia	musculoskeletal	11	55	0.00446791	0.00515174	0.866667	0.665548	0.958804	0.866296	0.667683	1	FALSE
619.2	Disorders of uterus, NEC	genitourinary	343	578	0.139318	0.0541401	2.82794	5.71454e-47	5.24393e-45	2.74594	2.75903e-42	2.53181e-40	FALSE
379.2	Disorders of vitreous body	sense organs	28	54	0.0113729	0.00505807	2.26282	0.000482344	0.00508416	1.95822	0.00476111	0.038027	FALSE
617	Disorders secondary to childbirth, surgery, trauma	genitourinary	203	363	0.0824533	0.0340015	2.55304	4.7613e-25	2.75097e-23	2.60262	8.47533e-25	5.28861e-23	FALSE
722.1	Displacement of intervertebral disc	musculoskeletal	27	85	0.0109667	0.00796178	1.3816	0.145471	0.469654	1.24185	0.339254	0.800226	FALSE
687.4	Disturbance of skin sensation	dermatologic	91	296	0.0369618	0.0277257	1.34591	0.014897	0.0908121	1.32202	0.0255156	0.145804	FALSE
350.6	Disturbances of sensation of smell and taste	neurological	11	17	0.00446791	0.00159236	2.81395	0.00760285	0.0515672	2.81472	0.00954326	0.0673642	FALSE
270.11	Disturbances of sulphur-bearing amino-acid metabolism	endocrine/metabolic	43	30	0.0174655	0.00281004	6.30809	1.27737e-14	3.8321e-13	6.01003	2.4595e-13	7.52319e-12	FALSE
386.9	Dizziness and giddiness (Light-headedness and vertigo)	sense organs	143	406	0.0580829	0.0380292	1.55984	8.61733e-06	0.000138588	1.57812	8.15389e-06	0.000146208	FALSE
375.1	Dry eyes	sense organs	29	60	0.011779	0.00562008	2.10895	0.00102645	0.00947493	2.02923	0.00238694	0.0218512	FALSE
705.1	Dyshidrosis	dermatologic	11	27	0.00446791	0.00252904	1.77009	0.111096	0.400252	1.82452	0.100683	0.387815	FALSE
626.2	Dysmenorrhea	genitourinary	103	139	0.0418359	0.0130199	3.30987	1.21138e-19	4.60916e-18	3.29597	1.29911e-18	5.62947e-17	FALSE
277.7	Dysmetabolic syndrome X	endocrine/metabolic	33	24	0.0134037	0.00224803	6.02985	2.48931e-11	6.16401e-10	5.59139	4.12978e-10	9.91147e-09	FALSE
625.1	Dyspareunia	genitourinary	57	175	0.0231519	0.0163919	1.42217	0.0223502	0.125869	1.41179	0.0282891	0.156493	FALSE
536.8	Dyspepsia and other specified disorders of function of stomach	digestive	10	45	0.00406174	0.00421506	0.963477	0.915416	0.958804	0.990979	0.979659	1	FALSE
532	Dysphagia	digestive	18	49	0.00731113	0.00458973	1.5973	0.0903494	0.344609	1.4566	0.184896	0.574578	FALSE
300.4	Dysthymic disorder	mental disorders	14	58	0.00568643	0.00543275	1.04696	0.877857	0.958804	0.945429	0.853544	1	FALSE
599.3	Dysuria	genitourinary	218	510	0.0885459	0.0477707	1.93648	4.2414e-15	1.29737e-13	1.96498	4.85036e-15	1.60991e-13	FALSE
636.2	Early onset of delivery	pregnancy complications	49	120	0.0199025	0.0112402	1.78631	0.000693477	0.00684699	1.9093	0.00022734	0.00293099	FALSE
636	Early or threatened labor; hemorrhage in early pregnancy	pregnancy complications	198	727	0.0804224	0.0680967	1.19683	0.0313603	0.158838	1.27398	0.0045577	0.0366495	FALSE
782.3	Edema	symptoms	58	192	0.0235581	0.0179843	1.31741	0.0688785	0.293581	1.31449	0.0775297	0.327768	FALSE
1015	Effects of other external causes	NULL	16	43	0.00649878	0.00402773	1.61752	0.10155	0.369273	1.47416	0.198761	0.603244	FALSE
288.2	Elevated white blood cell count	hematopoietic	24	92	0.00974817	0.00861746	1.1325	0.589001	0.958804	1.21414	0.40658	0.890276	FALSE
615	Endometriosis	genitourinary	129	217	0.0523964	0.020326	2.66505	5.84303e-18	2.02558e-16	2.53863	1.18016e-15	4.00229e-14	FALSE
726.1	Enthesopathy	musculoskeletal	51	129	0.0207149	0.0120832	1.72947	0.00103265	0.00947612	1.59163	0.00658074	0.0498347	FALSE
345	Epilepsy, recurrent seizures, convulsions	neurological	12	30	0.00487409	0.00281004	1.73812	0.106315	0.384807	1.60764	0.176297	0.556244	FALSE
477	Epistaxis or throat hemorrhage	respiratory	13	38	0.00528026	0.00355939	1.48604	0.218759	0.637876	1.6248	0.136678	0.478066	FALSE
401.1	Essential hypertension	circulatory system	122	427	0.0495532	0.0399963	1.2514	0.032995	0.164448	1.16747	0.152569	0.508564	FALSE
381.2	Eustachian tube disorders	sense organs	26	83	0.0105605	0.00777445	1.36219	0.17116	0.525609	1.26393	0.309985	0.771255	FALSE
626.12	Excessive or frequent menstruation	genitourinary	124	174	0.0503656	0.0162982	3.20111	2.52941e-22	1.16055e-20	2.99197	4.83401e-19	2.21796e-17	FALSE
643	Excessive vomiting in pregnancy	pregnancy complications	80	243	0.0324939	0.0227613	1.44195	0.00516852	0.0383947	1.42935	0.0074438	0.0552968	FALSE
369.2	Eye infection, viral	sense organs	10	25	0.00406174	0.0023417	1.73752	0.140516	0.464407	1.89428	0.0939369	0.368867	FALSE
728.7	Fasciitis	musculoskeletal	22	51	0.00893582	0.00477707	1.87842	0.0138148	0.0855204	1.73009	0.0362805	0.186791	FALSE
661	Fetal distress and abnormal forces of labor	pregnancy complications	117	1437	0.0475223	0.134601	0.320783	1.34213e-30	9.51692e-29	0.329582	1.03575e-28	7.34441e-27	FALSE
783	Fever of unknown origin	symptoms	85	334	0.0345248	0.0312851	1.10726	0.409752	0.869678	1.12873	0.338054	0.800226	FALSE
561.2	Flatulence	digestive	53	135	0.0215272	0.0126452	1.71786	0.000946154	0.00883832	1.65384	0.00268148	0.0236334	FALSE
1001	Foreign body injury	NULL	17	41	0.00690496	0.00384039	1.80353	0.041524	0.193945	1.89182	0.031374	0.168191	FALSE
801	Fracture of ankle and foot	injuries & poisonings	16	51	0.00649878	0.00477707	1.36277	0.281532	0.715578	1.32809	0.334544	0.796986	FALSE
801.1	Fracture of foot	injuries & poisonings	10	14	0.00406174	0.00131135	3.10592	0.00627209	0.0436806	2.80074	0.0163695	0.10423	FALSE
599.5	Frequency of urination and polyuria	genitourinary	110	227	0.0446791	0.0212626	2.1528	9.39063e-11	2.28897e-09	2.13828	3.69418e-10	9.14749e-09	FALSE
612.1	Galactorrhea	genitourinary	15	15	0.00609261	0.00140502	4.35676	5.748e-05	0.000800615	4.70642	4.15629e-05	0.000629157	FALSE
727.4	Ganglion and cyst of synovium, tendon, and bursa	musculoskeletal	18	53	0.00731113	0.00496441	1.47619	0.154788	0.484877	1.35049	0.285552	0.734533	FALSE
535.9	Gastritis and duodenitis, NOS	digestive	22	65	0.00893582	0.00608842	1.47189	0.118593	0.420463	1.41811	0.168586	0.542163	FALSE
300.11	Generalized anxiety disorder	mental disorders	86	237	0.034931	0.0221993	1.59427	0.000266232	0.00296659	1.56773	0.000598116	0.00681066	FALSE
530.11	GERD	digestive	184	810	0.074736	0.0758711	0.98383	0.84775	0.958804	0.97034	0.727823	1	FALSE
365	Glaucoma	sense organs	13	43	0.00528026	0.00402773	1.31263	0.391265	0.837275	1.29929	0.416897	0.900775	FALSE
250.5	Glycosuria or Acetonuria	endocrine/metabolic	12	32	0.00487409	0.00299738	1.62918	0.150226	0.476327	1.71656	0.117514	0.433384	FALSE
242.1	Graves' disease	endocrine/metabolic	28	74	0.0113729	0.00693143	1.64814	0.0250599	0.135272	1.76316	0.0125899	0.0839324	FALSE
41.8	H. pylori	infectious diseases	12	35	0.00487409	0.00327838	1.48912	0.234971	0.668895	1.42354	0.305242	0.763106	FALSE
735.3	Hallux valgus (Bunion)	musculoskeletal	22	45	0.00893582	0.00421506	2.13007	0.00378094	0.0297892	1.89554	0.0165774	0.105125	FALSE
389	Hearing loss	sense organs	17	68	0.00690496	0.00636943	1.08466	0.765181	0.958804	0.994876	0.985234	1	FALSE
530.9	Heartburn	digestive	16	67	0.00649878	0.00627576	1.03577	0.899814	0.958804	1.01555	0.956653	1	FALSE
228	Hemangioma and lymphangioma, any site	neoplasms	19	38	0.0077173	0.00355939	2.17724	0.00577402	0.0419254	2.0388	0.012827	0.0851497	FALSE
228.1	Hemangioma of skin and subcutaneous tissue	neoplasms	19	46	0.0077173	0.00430873	1.79724	0.0321544	0.160934	1.67414	0.0641815	0.285251	FALSE
593	Hematuria	genitourinary	53	154	0.0215272	0.0144249	1.5032	0.0112746	0.0723802	1.51995	0.0108351	0.0751557	FALSE
636.3	Hemorrhage in early pregnancy	pregnancy complications	671	682	0.272543	0.0638816	5.49012	1.74996e-176	1.36497e-173	5.86952	3.74587e-176	2.92178e-173	FALSE
459.1	Hemorrhage NOS	circulatory system	18	24	0.00731113	0.00224803	3.26882	0.000151355	0.00182628	2.82695	0.00122649	0.0125717	FALSE
578.8	Hemorrhage of rectum and anus	digestive	43	99	0.0174655	0.00927314	1.89915	0.000491286	0.00514367	1.9515	0.00037332	0.00451456	FALSE
455	Hemorrhoids	circulatory system	85	298	0.0345248	0.0279131	1.24534	0.0793354	0.310183	1.20552	0.142481	0.485307	FALSE
54	Herpes simplex	infectious diseases	125	436	0.0507717	0.0408393	1.25622	0.0283073	0.1481	1.1716	0.137749	0.479415	FALSE
53	Herpes zoster	infectious diseases	21	49	0.00852965	0.00458973	1.8658	0.017197	0.10358	1.80155	0.0271382	0.15218	FALSE
704.2	Hirsutism	dermatologic	17	46	0.00690496	0.00430873	1.60674	0.0958092	0.358423	1.73287	0.0590291	0.269256	FALSE
595	Hydronephrosis	genitourinary	13	91	0.00528026	0.00852379	0.617453	0.104906	0.380588	0.649007	0.151803	0.507093	FALSE
272.11	Hypercholesterolemia	endocrine/metabolic	46	67	0.018684	0.00627576	3.01481	1.0424e-08	2.19749e-07	2.70854	4.51686e-07	9.52204e-06	FALSE
643.1	Hyperemesis gravidarum	pregnancy complications	57	170	0.0231519	0.0159236	1.4647	0.0136339	0.0847363	1.51236	0.00881642	0.0636931	FALSE
272.12	Hyperglyceridemia	endocrine/metabolic	10	35	0.00406174	0.00327838	1.23992	0.549458	0.958804	1.16566	0.676306	1	FALSE
705.8	Hyperhidrosis	dermatologic	21	61	0.00852965	0.00571375	1.49707	0.112147	0.402184	1.32144	0.284035	0.733601	FALSE
272.1	Hyperlipidemia	endocrine/metabolic	121	242	0.049147	0.0226677	2.22853	1.78837e-12	4.64976e-11	2.10813	1.53608e-10	3.86498e-09	FALSE
367.8	Hypermetropia	sense organs	12	16	0.00487409	0.00149869	3.26327	0.00198951	0.0170014	3.34575	0.00204301	0.0191994	FALSE
327.1	Hypersomnia	neurological	12	39	0.00487409	0.00365305	1.33589	0.381438	0.821884	1.47209	0.248476	0.683509	FALSE
642	Hypertension complicating pregnancy, childbirth, and the puerperium	pregnancy complications	122	1218	0.0495532	0.114088	0.404852	2.15642e-20	8.62567e-19	0.389041	1.90164e-21	8.98957e-20	FALSE
623	Hypertrophy of female genital organs	genitourinary	29	66	0.011779	0.00618209	1.91614	0.00368146	0.0293014	1.70976	0.0197778	0.120521	FALSE
275.51	Hypocalcemia	endocrine/metabolic	11	22	0.00446791	0.0020607	2.1734	0.0358741	0.174078	2.25459	0.0324115	0.171397	FALSE
276.14	Hypopotassemia	endocrine/metabolic	20	73	0.00812348	0.00683777	1.18957	0.49328	0.951194	1.24237	0.40122	0.882939	FALSE
276.12	Hyposmolality and/or hyponatremia	endocrine/metabolic	16	35	0.00649878	0.00327838	1.98874	0.0230933	0.128054	2.11367	0.0153969	0.0992526	FALSE
458.9	Hypotension NOS	circulatory system	13	87	0.00528026	0.00814912	0.646086	0.14295	0.465557	0.658128	0.167477	0.541456	FALSE
244.4	Hypothyroidism NOS	endocrine/metabolic	407	1167	0.165313	0.109311	1.61379	1.88979e-14	5.56239e-13	1.56485	2.76266e-12	8.13162e-11	FALSE
276.5	Hypovolemia	endocrine/metabolic	28	111	0.0113729	0.0103972	1.09492	0.669809	0.958804	1.11185	0.626228	1	FALSE
380.4	Impacted cerumen	sense organs	29	95	0.011779	0.00889846	1.32757	0.184122	0.560995	1.35074	0.165947	0.539328	FALSE
250.41	Impaired fasting glucose	endocrine/metabolic	84	238	0.0341186	0.022293	1.5492	0.000685807	0.00684699	1.4753	0.00319879	0.0271227	FALSE
647.1	Infections of genitourinary tract during pregnancy	pregnancy complications	77	357	0.0312754	0.0334395	0.933194	0.588166	0.958804	1.02824	0.83079	1	FALSE
647	Infectious and parasitic complications affecting pregnancy	pregnancy complications	92	951	0.037368	0.0890783	0.396962	1.19298e-16	3.95968e-15	0.404063	9.49364e-16	3.29113e-14	FALSE
626.8	Infertility, female	genitourinary	1077	911	0.437449	0.0853316	8.33527	0	0	7.75007	1.29742e-298	2.02398e-295	FALSE
626.15	Infertility, female, associated with anovulation	genitourinary	165	161	0.0670187	0.0150806	4.69144	1.72761e-42	1.49726e-40	3.89556	2.13581e-31	1.66593e-29	FALSE
609.1	Infertility, male	genitourinary	24	29	0.00974817	0.00271637	3.61416	3.4713e-06	6.01692e-05	3.36231	2.18673e-05	0.000359084	FALSE
371.3	Inflammation of eyelids	sense organs	29	98	0.011779	0.00917947	1.28657	0.235894	0.670299	1.21769	0.363583	0.834245	FALSE
613.1	Inflammatory disease of breast	genitourinary	17	98	0.00690496	0.00917947	0.750495	0.276376	0.715578	0.703123	0.187765	0.578881	FALSE
614.4	Inflammatory diseases of uterus, except cervix	genitourinary	127	53	0.0515841	0.00496441	10.9015	1.93653e-47	2.01399e-45	10.6646	1.07501e-44	1.19787e-42	FALSE
481	Influenza	respiratory	19	75	0.0077173	0.0070251	1.0993	0.713462	0.958804	1.15776	0.577291	1	FALSE
1009	Injury, NOS	NULL	115	379	0.04671	0.0355002	1.33124	0.00860188	0.0573459	1.32745	0.0108968	0.0752171	FALSE
912	Insect bite	injuries & poisonings	14	41	0.00568643	0.00384039	1.48344	0.203842	0.603341	1.46667	0.224609	0.640666	FALSE
327.4	Insomnia	neurological	99	210	0.0402112	0.0196703	2.08801	2.91871e-09	6.41295e-08	1.88061	7.0124e-07	1.40248e-05	FALSE
835	Internal derangement of knee	injuries & poisonings	22	54	0.00893582	0.00505807	1.77356	0.0240368	0.130834	1.78653	0.0253608	0.145452	FALSE
271.3	Intestinal disaccharidase deficiencies and disaccharide malabsorption	endocrine/metabolic	68	201	0.0276198	0.0188273	1.48028	0.00577817	0.0419254	1.38093	0.0265651	0.149847	FALSE
8	Intestinal infection	infectious diseases	27	47	0.0109667	0.0044024	2.50761	0.000150251	0.00182628	2.10756	0.00275233	0.0241215	FALSE
557	Intestinal malabsorption (non-celiac)	digestive	12	15	0.00487409	0.00140502	3.48114	0.0013031	0.0117505	3.22614	0.0031145	0.0266957	FALSE
280.2	Iron deficiency anemia secondary to blood loss (chronic)	hematopoietic	20	64	0.00812348	0.00599475	1.35801	0.234042	0.667469	1.33865	0.267864	0.709454	FALSE
280.1	Iron deficiency anemias, unspecified or not due to blood loss	hematopoietic	102	360	0.0414297	0.0337205	1.2385	0.0616626	0.26945	1.24603	0.0599259	0.271757	FALSE
626.14	Irregular menstrual bleeding	genitourinary	94	113	0.0381803	0.0105845	3.71069	1.85106e-20	7.59907e-19	3.52171	5.34786e-18	2.0348e-16	FALSE
626.13	Irregular menstrual cycle	genitourinary	597	596	0.242486	0.0558262	5.41389	1.44186e-157	5.62325e-155	5.33492	4.56637e-146	1.78088e-143	FALSE
626.1	Irregular menstrual cycle/bleeding	genitourinary	93	93	0.0377742	0.00871113	4.46729	6.35467e-24	3.41837e-22	4.54502	2.70783e-23	1.50865e-21	FALSE
564.1	Irritable Bowel Syndrome	digestive	37	132	0.0150284	0.0123642	1.21877	0.291037	0.715578	1.06934	0.726488	1	FALSE
741.4	Joint effusions	musculoskeletal	34	65	0.0138099	0.00608842	2.28598	0.000102531	0.00132189	2.22626	0.000251357	0.00321407	FALSE
840.3	Joint/ligament sprain	injuries & poisonings	34	117	0.0138099	0.0109592	1.26377	0.232631	0.66466	1.14194	0.508184	0.977518	FALSE
701.4	Keloid scar	dermatologic	15	66	0.00609261	0.00618209	0.985437	0.959221	0.968509	0.996469	0.990312	1	FALSE
655	Known or suspected fetal abnormality affecting management of mother	pregnancy complications	765	4513	0.310723	0.422724	0.615611	3.00742e-24	1.67556e-22	0.619768	9.60228e-23	4.99318e-21	FALSE
737.3	Kyphoscoliosis and scoliosis	musculoskeletal	18	85	0.00731113	0.00796178	0.917676	0.74149	0.958804	0.971441	0.912491	1	FALSE
645	Late pregnancy and failed induction	pregnancy complications	96	1716	0.0389927	0.160734	0.211859	2.49902e-47	2.43654e-45	0.227386	1.16973e-42	1.21652e-40	FALSE
214	Lipoma	neoplasms	14	33	0.00568643	0.00309105	1.84445	0.0555412	0.248265	1.95983	0.037787	0.193271	FALSE
214.1	Lipoma of skin and subcutaneous tissue	neoplasms	10	19	0.00406174	0.00177969	2.2875	0.0344709	0.168572	2.14321	0.0565953	0.261547	FALSE
277.51	Lipoprotein disorders	endocrine/metabolic	11	26	0.00446791	0.00243537	1.83834	0.0911217	0.346707	1.87817	0.0859417	0.34942	FALSE
687.2	Localized superficial swelling, mass, or lump	dermatologic	26	136	0.0105605	0.0127389	0.827176	0.377994	0.818986	0.793989	0.291585	0.743257	FALSE
611.3	Lump or mass in breast	genitourinary	143	397	0.0580829	0.0371862	1.5966	3.0218e-06	5.29663e-05	1.4711	0.000168201	0.00224268	FALSE
289.4	Lymphadenitis	hematopoietic	47	130	0.0190902	0.0121768	1.57879	0.0078191	0.0525767	1.50128	0.0209207	0.125044	FALSE
296.22	Major depressive disorder	mental disorders	167	509	0.067831	0.047677	1.45348	4.92124e-05	0.000691634	1.35344	0.00139102	0.0137341	FALSE
647.3	Major puerperal infection	pregnancy complications	14	73	0.00568643	0.00683777	0.830659	0.526055	0.951194	0.919969	0.778648	1	FALSE
798	Malaise and fatigue	symptoms	222	500	0.0901706	0.046834	2.01703	6.44903e-17	2.18706e-15	1.96351	5.06465e-15	1.64601e-13	FALSE
174.11	Malignant neoplasm of female breast	neoplasms	20	33	0.00812348	0.00309105	2.6414	0.000633342	0.00645761	2.31976	0.00414956	0.0337151	FALSE
652	Malposition and malpresentation of fetus or obstruction	pregnancy complications	220	1985	0.0893582	0.185931	0.429632	1.6486e-29	1.11818e-27	0.428735	6.87533e-29	5.10739e-27	FALSE
613.5	Mastodynia	genitourinary	94	260	0.0381803	0.0243537	1.59028	0.00015219	0.00182628	1.57003	0.000319271	0.00389112	FALSE
658	Maternal complication of pregnancy affecting fetus or newborn	pregnancy complications	48	336	0.0194963	0.0314725	0.611907	0.00163507	0.0144108	0.604247	0.00147615	0.0143031	FALSE
857	Mechanical complication of unspecified genitourinary device, implant, and graft	injuries & poisonings	20	45	0.00812348	0.00421506	1.93484	0.0143863	0.088706	1.93283	0.0178511	0.112289	FALSE
306.1	Mental disorders durring/after pregnancy	mental disorders	118	919	0.0479285	0.0860809	0.534472	4.48069e-10	1.01303e-08	0.516224	9.74938e-11	2.49328e-09	FALSE
593.2	Microscopic hematuria	genitourinary	10	38	0.00406174	0.00355939	1.14171	0.709782	0.958804	1.1542	0.692993	1	FALSE
340.1	Migrain with aura	neurological	46	115	0.018684	0.0107718	1.74851	0.00149079	0.0133657	1.84956	0.000634745	0.00707623	FALSE
340	Migraine	neurological	162	465	0.0658002	0.0435556	1.54669	3.58212e-06	6.14077e-05	1.52232	1.34132e-05	0.000229941	FALSE
262	Mineral deficiency NEC	endocrine/metabolic	12	37	0.00487409	0.00346572	1.40836	0.303746	0.724532	1.36499	0.359103	0.827475	FALSE
634	Miscarriage; stillbirth	pregnancy complications	1453	10	0.590171	0.00093668	1535.95	4.52255e-117	1.41104e-114	1771.25	4.33653e-120	1.353e-117	FALSE
272.13	Mixed hyperlipidemia	endocrine/metabolic	10	43	0.00406174	0.00402773	1.00848	0.980852	0.982742	0.893506	0.7534	1	FALSE
296	Mood disorders	mental disorders	13	51	0.00528026	0.00477707	1.10589	0.746601	0.958804	1.05751	0.859384	1	FALSE
278.11	Morbid obesity	endocrine/metabolic	47	190	0.0190902	0.0177969	1.07408	0.663905	0.958804	1.09193	0.602964	1	FALSE
622.2	Mucous polyp of cervix	genitourinary	27	92	0.0109667	0.00861746	1.27564	0.268539	0.715578	1.21803	0.377591	0.853226	FALSE
651	Multiple gestation	pregnancy complications	110	216	0.0446791	0.0202323	2.26482	7.36931e-12	1.88461e-10	2.1525	3.99375e-10	9.73477e-09	FALSE
772.3	Muscle weakness	symptoms	19	36	0.0077173	0.00337205	2.29863	0.00343317	0.027613	2.43584	0.00212957	0.0197746	FALSE
771	Musculoskeletal symptoms referable to limbs	symptoms	12	62	0.00487409	0.00580742	0.838499	0.577454	0.958804	0.714759	0.299536	0.755582	FALSE
770	Myalgia and myositis unspecified	symptoms	40	122	0.016247	0.0114275	1.42871	0.051977	0.236919	1.41482	0.0649654	0.287915	FALSE
200	Myeloproliferative disease	neoplasms	10	27	0.00406174	0.00252904	1.60851	0.19997	0.598759	1.64337	0.190397	0.584684	FALSE
367.1	Myopia	sense organs	58	247	0.0235581	0.023136	1.01868	0.900233	0.958804	1.00235	0.987509	1	FALSE
789	Nausea and vomiting	symptoms	211	722	0.0857027	0.0676283	1.29231	0.00168901	0.0147199	1.32713	0.000709705	0.00785205	FALSE
199	Neoplasm of uncertain behavior	neoplasms	37	100	0.0150284	0.0093668	1.61366	0.0135164	0.0843423	1.54857	0.0273144	0.15218	FALSE
173	Neoplasm of uncertain behavior of skin	neoplasms	69	202	0.028026	0.0189209	1.49509	0.00441356	0.0340849	1.44001	0.0115187	0.0777887	FALSE
766	Neuralgia, neuritis, and radiculitis NOS	symptoms	16	61	0.00649878	0.00571375	1.13829	0.645738	0.958804	1.01579	0.956619	1	FALSE
217.1	Nevus, non-neoplastic	neoplasms	73	178	0.0296507	0.0166729	1.80216	2.88286e-05	0.000416414	1.69219	0.000270783	0.00335256	FALSE
558	Noninfectious gastroenteritis	digestive	46	106	0.018684	0.00992881	1.89858	0.000315933	0.00344654	1.9444	0.000269178	0.00335256	FALSE
619.3	Noninflammatory disorders of cervix	genitourinary	66	248	0.0268075	0.0232297	1.15826	0.295174	0.715578	1.18902	0.224644	0.640666	FALSE
619.1	Noninflammatory disorders of ovary, fallopian tube, and broad ligament	genitourinary	143	225	0.0580829	0.0210753	2.86425	6.55166e-22	2.92017e-20	2.67632	2.56424e-18	1.05269e-16	FALSE
619.4	Noninflammatory disorders of vagina	genitourinary	228	455	0.0926076	0.042619	2.29263	8.65684e-23	4.22021e-21	2.41568	2.45861e-24	1.42053e-22	FALSE
619.5	Noninflammatory disorders of vulva and perineum	genitourinary	34	106	0.0138099	0.00992881	1.39637	0.0923649	0.350582	1.42046	0.0840561	0.34942	FALSE
619	Noninflammatory female genital disorders	genitourinary	77	83	0.0312754	0.00777445	4.12044	8.10321e-19	2.87296e-17	3.81774	3.83045e-16	1.35807e-14	FALSE
395.1	Nonrheumatic mitral valve disorders	circulatory system	27	62	0.0109667	0.00580742	1.89824	0.00566503	0.0414904	1.89186	0.00688406	0.0516305	FALSE
579.8	Nonspecific abnormal findings in stool contents	digestive	13	37	0.00528026	0.00346572	1.52635	0.190722	0.574374	1.38806	0.319653	0.782824	FALSE
793	Nonspecific abnormal findings on radiological and other examination of musculoskeletal system	symptoms	10	27	0.00406174	0.00252904	1.60851	0.19997	0.598759	1.55598	0.240588	0.672612	FALSE
793.2	Nonspecific abnormal findings on radiological and other examination of other intrathoracic organs (echocardiogram, etc)	symptoms	23	82	0.009342	0.00768078	1.21832	0.404754	0.860239	1.20287	0.44396	0.918539	FALSE
418	Nonspecific chest pain	circulatory system	148	452	0.0601137	0.042338	1.44671	0.000151243	0.00182628	1.44153	0.00025374	0.00321817	FALSE
573.6	Nonspecific elevation of levels of transaminase or lactic acid dehydrogenase [LDH]	digestive	19	55	0.0077173	0.00515174	1.50187	0.127766	0.437095	1.59375	0.0877763	0.351105	FALSE
241.2	Nontoxic multinodular goiter	endocrine/metabolic	25	59	0.0101543	0.00552641	1.84601	0.0105418	0.0688084	1.88287	0.00934834	0.0668964	FALSE
241	Nontoxic nodular goiter	endocrine/metabolic	19	35	0.0077173	0.00327838	2.36453	0.00260674	0.0217461	2.36187	0.00319909	0.0271227	FALSE
241.1	Nontoxic uninodular goiter	endocrine/metabolic	46	136	0.018684	0.0127389	1.47558	0.0237419	0.130413	1.37129	0.0727895	0.314548	FALSE
650	Normal delivery	pregnancy complications	81	1750	0.0329001	0.163919	0.173518	1.50827e-51	1.96074e-49	0.172771	9.18182e-51	1.30215e-48	FALSE
278.1	Obesity	endocrine/metabolic	185	642	0.0751422	0.0601349	1.26984	0.00581386	0.041989	1.31299	0.0024463	0.0220591	FALSE
665	Obstetrical/birth trauma	pregnancy complications	201	4392	0.0816409	0.41139	0.127195	2.25471e-161	1.17245e-158	0.133392	6.76432e-151	3.51745e-148	FALSE
575.2	Obstruction of bile duct	digestive	14	168	0.00568643	0.0157362	0.357707	0.000227433	0.00262811	0.393891	0.00093581	0.0101379	FALSE
327.32	Obstructive sleep apnea	neurological	49	121	0.0199025	0.0113338	1.77138	0.000816882	0.00781801	1.6164	0.00601525	0.0462256	FALSE
871.2	Open wound of finger(s)	injuries & poisonings	14	72	0.00568643	0.0067441	0.842275	0.557922	0.958804	0.797717	0.446388	0.919282	FALSE
870	Open wounds of head; neck; and trunk	injuries & poisonings	14	31	0.00568643	0.00290371	1.96382	0.0365421	0.175944	1.96465	0.0394812	0.19868	FALSE
740.9	Osteoarthrosis NOS	musculoskeletal	20	46	0.00812348	0.00430873	1.8926	0.0176196	0.105312	1.89034	0.0204225	0.123008	FALSE
740.11	Osteoarthrosis, localized, primary	musculoskeletal	14	39	0.00568643	0.00365305	1.55981	0.154674	0.484877	1.32092	0.387329	0.864425	FALSE
743.9	Osteopenia or other disorder of bone and cartilage	musculoskeletal	14	52	0.00568643	0.00487074	1.16843	0.606174	0.958804	1.11919	0.715454	1	FALSE
382	Otalgia	sense organs	37	128	0.0150284	0.0119895	1.25733	0.223224	0.649683	1.23594	0.269008	0.711159	FALSE
790.6	Other abnormal blood chemistry	symptoms	135	281	0.0548335	0.0263207	2.14613	1.05087e-12	2.87607e-11	2.14952	2.66238e-12	7.98713e-11	FALSE
250.42	Other abnormal glucose	endocrine/metabolic	127	259	0.0515841	0.02426	2.18756	1.55091e-12	4.17142e-11	2.11514	4.33159e-11	1.12621e-09	FALSE
599.9	Other abnormality of urination	genitourinary	43	80	0.0174655	0.00749344	2.35442	6.90344e-06	0.000112181	2.49905	2.58738e-06	4.86304e-05	FALSE
738	Other acquired musculoskeletal deformity	musculoskeletal	10	23	0.00406174	0.00215436	1.88896	0.0936991	0.354486	1.99719	0.0737763	0.316714	FALSE
795	Other and nonspecific abnormal cytological, histological and immunological findings	symptoms	28	107	0.0113729	0.0100225	1.13629	0.54948	0.958804	1.06811	0.762183	1	FALSE
286.7	Other and unspecified coagulation defects	hematopoietic	17	31	0.00690496	0.00290371	2.38756	0.00403132	0.0314443	2.50405	0.00323652	0.0272917	FALSE
654	Other and unspecified complications of birth; puerperium affecting management of mother	pregnancy complications	91	1487	0.0369618	0.139284	0.237174	8.03154e-39	6.2646e-37	0.237987	7.49058e-38	6.15016e-36	FALSE
759	Other and unspecified congenital anomalies	congenital anomalies	78	376	0.0316816	0.0352192	0.896268	0.386549	0.829459	0.897586	0.401285	0.882939	FALSE
285	Other anemias	hematopoietic	162	897	0.0658002	0.0840202	0.767873	0.00282677	0.0233321	0.753918	0.00171673	0.01643	FALSE
215	Other benign neoplasm of connective and other soft tissue	neoplasms	63	197	0.025589	0.0184526	1.3969	0.0225111	0.125869	1.16238	0.315777	0.779598	FALSE
571.5	Other chronic nonalcoholic liver disease	digestive	30	131	0.0121852	0.0122705	0.992963	0.972337	0.976091	1.11845	0.588522	1	FALSE
646	Other complications of pregnancy NEC	pregnancy complications	516	2986	0.209586	0.279693	0.682878	1.63283e-12	4.3173e-11	0.694658	4.22453e-11	1.11699e-09	FALSE
674	Other complications of the puerperium NEC	pregnancy complications	56	495	0.0227457	0.0463657	0.478716	2.48228e-07	4.85216e-06	0.483693	5.01525e-07	1.01608e-05	FALSE
348.9	Other conditions of brain, NOS	neurological	14	29	0.00568643	0.00271637	2.09965	0.0229726	0.12799	2.1465	0.0226958	0.134621	FALSE
649	Other conditions or status of the mother complicating pregnancy, childbirth, or the puerperium	pregnancy complications	570	4658	0.231519	0.436306	0.38923	1.13543e-74	2.95212e-72	0.394447	5.48287e-70	1.42555e-67	FALSE
742.9	Other derangement of joint	musculoskeletal	21	94	0.00852965	0.0088048	0.968482	0.894893	0.958804	0.948215	0.828981	1	FALSE
289	Other diseases of blood and blood-forming organs	hematopoietic	16	43	0.00649878	0.00402773	1.61752	0.10155	0.369273	1.66973	0.0876439	0.351105	FALSE
510	Other diseases of lung	respiratory	10	29	0.00406174	0.00271637	1.4973	0.2719	0.715578	1.49637	0.282559	0.731	FALSE
519.8	Other diseases of respiratory system, NEC	respiratory	11	21	0.00446791	0.00196703	2.27711	0.0273163	0.144944	2.27251	0.0308754	0.166089	FALSE
733	Other disorders of bone and cartilage	musculoskeletal	15	66	0.00609261	0.00618209	0.985437	0.959221	0.968509	0.905672	0.733875	1	FALSE
723	Other disorders of cervical region	musculoskeletal	10	18	0.00406174	0.00168602	2.41481	0.0256335	0.137417	2.31086	0.0397742	0.199511	FALSE
388	Other disorders of ear	sense organs	24	60	0.00974817	0.00562008	1.74176	0.0221602	0.125253	1.67054	0.0381217	0.194346	FALSE
379	Other disorders of eye	sense organs	11	36	0.00446791	0.00337205	1.32644	0.413197	0.873425	1.39364	0.343263	0.803583	FALSE
374	Other disorders of eyelids	sense organs	16	47	0.00649878	0.0044024	1.47931	0.177396	0.542624	1.42016	0.235544	0.664971	FALSE
569	Other disorders of intestine	digestive	15	43	0.00609261	0.00402773	1.51581	0.166592	0.513605	1.58738	0.131548	0.466396	FALSE
573	Other disorders of liver	digestive	21	75	0.00852965	0.0070251	1.21601	0.430162	0.89713	1.2682	0.346613	0.809455	FALSE
277	Other disorders of metabolism	endocrine/metabolic	15	27	0.00609261	0.00252904	2.4177	0.00624206	0.0436664	2.77713	0.00202825	0.0191762	FALSE
568	Other disorders of peritoneum	digestive	15	17	0.00609261	0.00159236	3.84348	0.000148777	0.00182628	4.10768	0.000104718	0.00144566	FALSE
729	Other disorders of soft tissues	musculoskeletal	32	96	0.0129976	0.00899213	1.4513	0.0697233	0.296371	1.3642	0.138869	0.479415	FALSE
537	Other disorders of stomach and duodenum	digestive	20	39	0.00812348	0.00365305	2.23377	0.00358515	0.0286812	2.26124	0.00374014	0.030871	FALSE
676	Other disorders of the breast associated with childbirth and disorders of lactation	pregnancy complications	31	284	0.0125914	0.0266017	0.466614	6.28345e-05	0.000852363	0.444977	2.66472e-05	0.000428552	FALSE
586	Other disorders of the kidney and ureters	genitourinary	22	122	0.00893582	0.0114275	0.779992	0.28565	0.715578	0.828418	0.425059	0.904256	FALSE
246	Other disorders of thyroid	endocrine/metabolic	97	264	0.0393989	0.0247284	1.6176	6.94592e-05	0.000918274	1.54459	0.000437521	0.00513182	FALSE
694.2	Other dyschromia	dermatologic	111	334	0.0450853	0.0312851	1.46194	0.000690574	0.00684699	1.44534	0.00128203	0.0128301	FALSE
512.9	Other dyspnea	respiratory	67	163	0.0272136	0.0152679	1.8043	5.86631e-05	0.000809863	1.74998	0.000194808	0.00255378	FALSE
259	Other endocrine disorders	endocrine/metabolic	36	36	0.0146223	0.00337205	4.38582	4.26955e-10	9.79485e-09	4.24804	2.84409e-09	6.62206e-08	FALSE
414	Other forms of chronic heart disease	circulatory system	22	54	0.00893582	0.00505807	1.77356	0.0240368	0.130834	1.75126	0.0303303	0.164862	FALSE
339	Other headache syndromes	neurological	193	571	0.0783916	0.0534845	1.5053	2.2301e-06	3.95336e-05	1.53621	1.35726e-06	2.64666e-05	FALSE
282.8	Other hemoglobinopathies	hematopoietic	40	156	0.016247	0.0146122	1.11372	0.54659	0.958804	1.06893	0.714682	1	FALSE
638	Other high-risk pregnancy	pregnancy complications	1446	7381	0.587327	0.691364	0.635353	6.01267e-23	3.02573e-21	0.616752	1.28526e-24	7.71154e-23	FALSE
401.3	Other hypertensive complications	circulatory system	14	62	0.00568643	0.00580742	0.979048	0.943115	0.958804	0.973401	0.92897	1	FALSE
701	Other hypertrophic and atrophic conditions of skin	dermatologic	70	185	0.0284322	0.0173286	1.65952	0.000365915	0.00393674	1.51652	0.00418418	0.0338203	FALSE
1019	Other ill-defined and unknown causes of morbidity and mortality	NULL	1146	5573	0.465475	0.522012	0.79738	4.34798e-07	8.17211e-06	0.826572	3.38639e-05	0.000533612	FALSE
279.7	Other immunological findings	endocrine/metabolic	23	24	0.009342	0.00224803	4.18539	9.99619e-07	1.8346e-05	3.7333	1.03348e-05	0.000181149	FALSE
686	Other local infections of skin and subcutaneous tissue	dermatologic	18	54	0.00731113	0.00505807	1.44872	0.174667	0.535326	1.45681	0.176049	0.556244	FALSE
598.9	Other nonspecific findings on examination of urine	genitourinary	51	242	0.0207149	0.0226677	0.912029	0.554306	0.958804	0.938364	0.688046	1	FALSE
656	Other perinatal conditions of fetus or newborn	pregnancy complications	547	3144	0.222177	0.294492	0.6843	7.62633e-13	2.1631e-11	0.691132	7.70096e-12	2.14527e-10	FALSE
351	Other peripheral nerve disorders	neurological	62	214	0.0251828	0.020045	1.26294	0.109828	0.3966	1.19866	0.22454	0.640666	FALSE
362	Other retinal disorders	sense organs	10	44	0.00406174	0.00412139	0.985466	0.966734	0.972343	0.91999	0.814442	1	FALSE
613.7	Other signs and symptoms in breast	genitourinary	19	85	0.0077173	0.00796178	0.969054	0.901797	0.958804	0.864929	0.57809	1	FALSE
427.3	Other specified cardiac dysrhythmias	circulatory system	41	152	0.0166531	0.0142375	1.17254	0.369644	0.807966	1.24807	0.220272	0.639723	FALSE
704.8	Other specified diseases of hair and hair follicles	dermatologic	25	69	0.0101543	0.00646309	1.57699	0.0520919	0.236919	1.45711	0.116391	0.430294	FALSE
706.8	Other specified diseases of sebaceous glands	dermatologic	30	55	0.0121852	0.00515174	2.3821	0.000141455	0.00176536	2.17501	0.000892657	0.00973808	FALSE
613.8	Other specified disorders of breast	genitourinary	20	51	0.00812348	0.00477707	1.70625	0.0436063	0.203062	1.36905	0.248923	0.683509	FALSE
1005	Other symptoms	NULL	32	114	0.0129976	0.0106782	1.22007	0.323131	0.756884	1.18476	0.412592	0.897608	FALSE
579	Other symptoms involving abdomen and pelvis	digestive	23	67	0.009342	0.00627576	1.49319	0.0985678	0.365063	1.53048	0.0851114	0.34942	FALSE
599.8	Other symptoms involving urinary system	genitourinary	36	72	0.0146223	0.0067441	2.18549	0.000140577	0.00176536	2.09558	0.000436747	0.00513182	FALSE
724.8	Other symptoms referable to back	musculoskeletal	11	31	0.00446791	0.00290371	1.54111	0.218747	0.637876	1.58864	0.196393	0.597217	FALSE
599	Other symptoms/disorders or the urinary system	genitourinary	22	26	0.00893582	0.00243537	3.69325	6.90301e-06	0.000112181	3.65311	1.44377e-05	0.000244814	FALSE
1010	Other tests	NULL	335	2333	0.136068	0.218528	0.563229	1.16155e-19	4.53005e-18	0.575267	7.62231e-18	2.83114e-16	FALSE
479	Other upper respiratory disease	respiratory	99	273	0.0402112	0.0255714	1.59649	9.06626e-05	0.00117861	1.53944	0.000409387	0.00491264	FALSE
380.1	Otitis externa	sense organs	18	76	0.00731113	0.00711877	1.02722	0.918693	0.958804	1.02711	0.920428	1	FALSE
381.1	Otitis media	sense organs	21	32	0.00852965	0.00299738	2.86158	0.000190091	0.00224654	2.67855	0.000635046	0.00707623	FALSE
628	Ovarian cyst	genitourinary	411	669	0.166937	0.0626639	2.99746	5.41135e-60	9.37967e-58	2.85563	3.32568e-52	5.18805e-50	FALSE
256	Ovarian dysfunction	endocrine/metabolic	106	79	0.0430544	0.00739978	6.03513	6.14829e-33	4.5673e-31	4.61761	5.92851e-23	3.18913e-21	FALSE
625	Pain and other symptoms associated with female genital organs	genitourinary	167	276	0.067831	0.0258524	2.74194	1.30622e-23	6.79236e-22	2.74813	1.59371e-22	8.01997e-21	FALSE
745	Pain in joint	musculoskeletal	308	941	0.125102	0.0881416	1.47928	2.05639e-08	4.221e-07	1.43417	4.93147e-07	1.01608e-05	FALSE
773	Pain in limb	symptoms	191	569	0.0775792	0.0532971	1.49392	3.74562e-06	6.35127e-05	1.44042	4.19438e-05	0.000629157	FALSE
379.9	Pain, swelling or discharge of eye	sense organs	23	78	0.009342	0.00730611	1.28128	0.298349	0.715578	1.32456	0.247112	0.683509	FALSE
512.2	Painful respiration	respiratory	34	83	0.0138099	0.00777445	1.78719	0.00459116	0.0352818	1.69124	0.0121198	0.0814954	FALSE
782.6	Pallor and flushing	symptoms	17	23	0.00690496	0.00215436	3.22043	0.000264767	0.00296659	3.50005	0.000140906	0.00189494	FALSE
427.9	Palpitations	circulatory system	136	311	0.0552396	0.0291308	1.94867	2.39244e-10	5.57045e-09	1.92835	1.13775e-09	2.68922e-08	FALSE
792.1	Papanicolaou smear of cervix or vagina with atypical squamous cells	genitourinary	107	309	0.0434606	0.0289434	1.52436	0.000230617	0.00264531	1.53091	0.000263206	0.0033113	FALSE
427.11	Paroxysmal supraventricular tachycardia	circulatory system	12	48	0.00487409	0.00449607	1.08449	0.802042	0.958804	1.10822	0.754213	1	FALSE
614.33	Pelvic inflammatory disease, NOS	genitourinary	12	18	0.00487409	0.00168602	2.90014	0.00434594	0.0337297	3.18997	0.00264439	0.0234389	FALSE
614.1	Pelvic peritoneal adhesions, female (postoperative) (postinfection)	genitourinary	30	148	0.0121852	0.0138629	0.877489	0.516574	0.951194	0.958583	0.836245	1	FALSE
726	Peripheral enthesopathies and allied syndromes	musculoskeletal	33	84	0.0134037	0.00786812	1.71311	0.009197	0.0605372	1.55838	0.0361776	0.186791	FALSE
386.2	Peripheral or central vertigo	sense organs	21	59	0.00852965	0.00552641	1.54811	0.0866685	0.334661	1.45125	0.154755	0.511519	FALSE
362.6	Peripheral retinal degenerations	sense organs	11	17	0.00446791	0.00159236	2.81395	0.00760285	0.0515672	2.78716	0.0093168	0.0668964	FALSE
300.13	Phobia	mental disorders	10	21	0.00406174	0.00196703	2.06925	0.0588296	0.258809	2.02445	0.0764196	0.324835	FALSE
253.1	Pituitary hyperfunction	endocrine/metabolic	57	51	0.0231519	0.00477707	4.93763	1.89465e-16	6.15761e-15	4.63597	1.61394e-14	5.03549e-13	FALSE
635.3	Placenta previa and abruptio placenta	pregnancy complications	96	878	0.0389927	0.0822405	0.452793	5.61838e-13	1.62309e-11	0.460991	3.36042e-12	9.70789e-11	FALSE
507	Pleurisy; pleural effusion	respiratory	16	55	0.00649878	0.00515174	1.26318	0.412231	0.872564	1.13167	0.670661	1	FALSE
480	Pneumonia	respiratory	32	75	0.0129976	0.0070251	1.86136	0.00343392	0.027613	1.77947	0.00809226	0.0592672	FALSE
256.4	Polycystic ovaries	endocrine/metabolic	166	259	0.0674249	0.02426	2.9079	1.33743e-25	8.02456e-24	3.12539	1.58529e-27	1.03044e-25	FALSE
622.1	Polyp of corpus uteri	genitourinary	182	166	0.0739236	0.0155489	5.05395	2.73615e-49	3.04885e-47	4.66337	1.28049e-42	1.24848e-40	FALSE
627.3	Postmenopausal atrophic vaginitis	genitourinary	11	40	0.00446791	0.00374672	1.19335	0.604402	0.958804	0.968812	0.927345	1	FALSE
475.9	Postnasal drip	respiratory	16	57	0.00649878	0.00533908	1.21863	0.485992	0.951194	1.10737	0.72479	1	FALSE
300.9	Posttraumatic stress disorder	mental disorders	21	69	0.00852965	0.00646309	1.3225	0.26397	0.715578	1.23255	0.415088	0.899122	FALSE
418.1	Precordial pain	circulatory system	10	26	0.00406174	0.00243537	1.67054	0.168653	0.518934	1.74182	0.146621	0.492843	FALSE
642.1	Preeclampsia and eclampsia	pregnancy complications	92	945	0.037368	0.0885163	0.399729	2.04781e-16	6.51956e-15	0.390297	9.08795e-17	3.29702e-15	FALSE
427.6	Premature beats	circulatory system	22	49	0.00893582	0.00458973	1.95545	0.00923653	0.060542	1.88335	0.0160263	0.102463	FALSE
627.5	Premature menopause and other ovarian failure	genitourinary	87	94	0.0353371	0.0088048	4.12378	4.76687e-21	2.00982e-19	2.92367	4.74586e-12	1.3461e-10	FALSE
627.4	Premenopausal menorrhagia	genitourinary	22	20	0.00893582	0.00187336	4.80393	4.05339e-07	7.71134e-06	4.52264	2.31105e-06	4.39664e-05	FALSE
626.4	Premenstrual tension syndromes	genitourinary	18	39	0.00731113	0.00365305	2.00875	0.0146754	0.0901324	1.69413	0.0720122	0.312922	FALSE
286.81	Primary hypercoagulable state	hematopoietic	95	105	0.0385865	0.00983514	4.04066	2.09677e-22	9.91202e-21	3.67185	1.22105e-18	5.44237e-17	FALSE
287.31	Primary thrombocytopenia	hematopoietic	13	42	0.00528026	0.00393406	1.34401	0.352771	0.803391	1.44482	0.254542	0.690852	FALSE
653	Problems associated with amniotic cavity and membranes	pregnancy complications	197	1772	0.0800162	0.16598	0.437038	7.14698e-26	4.45972e-24	0.459706	1.69557e-22	8.2659e-21	FALSE
618.1	Prolapse of vaginal walls	genitourinary	14	54	0.00568643	0.00505807	1.12494	0.695462	0.958804	0.950002	0.867815	1	FALSE
269	Proteinuria	endocrine/metabolic	19	57	0.0077173	0.00533908	1.4489	0.163086	0.50479	1.43888	0.181131	0.565128	FALSE
695.7	Prurigo and Lichen	dermatologic	20	32	0.00812348	0.00299738	2.7242	0.000456571	0.00487842	2.5741	0.00124035	0.0125717	FALSE
698	Pruritus and related conditions	dermatologic	107	367	0.0434606	0.0343762	1.27627	0.0297131	0.151478	1.24234	0.0579875	0.26606	FALSE
696.41	Psoriasis vulgaris	dermatologic	16	61	0.00649878	0.00571375	1.13829	0.645738	0.958804	1.01135	0.968542	1	FALSE
508	Pulmonary collapse; interstitial and compensatory emphysema	respiratory	12	52	0.00487409	0.00487074	1.00069	0.998284	0.999144	1.07803	0.817576	1	FALSE
415.11	Pulmonary embolism and infarction, acute	circulatory system	10	25	0.00406174	0.0023417	1.73752	0.140516	0.464407	1.57938	0.233354	0.660674	FALSE
590	Pyelonephritis	genitourinary	21	85	0.00852965	0.00796178	1.07194	0.776512	0.958804	1.2089	0.448023	0.920837	FALSE
687.1	Rash and other nonspecific skin eruption	dermatologic	138	435	0.056052	0.0407456	1.39796	0.000843885	0.00797855	1.40108	0.000989266	0.0105702	FALSE
443.1	Raynaud's syndrome	circulatory system	12	29	0.00487409	0.00271637	1.79823	0.0880181	0.339033	1.70127	0.130346	0.46319	FALSE
599.2	Retention of urine	genitourinary	18	151	0.00731113	0.0141439	0.513353	0.00773575	0.0522414	0.540979	0.0150708	0.0975534	FALSE
654.2	Rhesus isoimmunization in pregnancy	pregnancy complications	48	134	0.0194963	0.0125515	1.56431	0.00838026	0.0561082	1.53153	0.014178	0.0925426	FALSE
714.1	Rheumatoid arthritis	musculoskeletal	14	42	0.00568643	0.00393406	1.44798	0.231562	0.662819	1.33265	0.363238	0.834245	FALSE
695.3	Rosacea	dermatologic	25	89	0.0101543	0.00833646	1.2203	0.381416	0.821884	1.14571	0.558486	1	FALSE
701.2	Scar conditions and fibrosis of skin	dermatologic	32	119	0.0129976	0.0111465	1.16825	0.437746	0.899715	1.10492	0.625473	1	FALSE
764	Sciatica	symptoms	46	169	0.018684	0.0158299	1.18373	0.314878	0.743104	1.25005	0.191952	0.588301	FALSE
706.2	Sebaceous cyst	dermatologic	55	139	0.0223396	0.0130199	1.73216	0.000638939	0.00647237	1.70647	0.00115777	0.0119611	FALSE
690.1	Seborrheic dermatitis	dermatologic	58	102	0.0235581	0.00955414	2.50111	3.34187e-08	6.77055e-07	2.49679	7.03545e-08	1.54582e-06	FALSE
702.2	Seborrheic keratosis	dermatologic	70	190	0.0284322	0.0177969	1.61508	0.00071313	0.00699675	1.48623	0.00636099	0.0486429	FALSE
244.1	Secondary hypothyroidism	endocrine/metabolic	20	78	0.00812348	0.00730611	1.11279	0.67106	0.958804	1.11206	0.677017	1	FALSE
287.32	Secondary thrombocytopenia	hematopoietic	14	156	0.00568643	0.0146122	0.385663	0.000660138	0.00664397	0.39639	0.00106529	0.011079	FALSE
994.2	Sepsis	injuries & poisonings	12	40	0.00487409	0.00374672	1.30237	0.423251	0.888293	1.3293	0.396984	0.878433	FALSE
470	Septal Deviations/Turbinate Hypertrophy	respiratory	28	75	0.0113729	0.0070251	1.62601	0.0289752	0.148457	1.51274	0.0692031	0.30325	FALSE
38	Septicemia	infectious diseases	11	39	0.00446791	0.00365305	1.22406	0.554564	0.958804	1.28649	0.469138	0.945549	FALSE
637	Short gestation; low birth weight; and fetal growth retardation	pregnancy complications	16	145	0.00649878	0.0135819	0.475078	0.00487244	0.0367198	0.502842	0.0099875	0.0701824	FALSE
512.7	Shortness of breath	respiratory	112	378	0.0454915	0.0354065	1.29841	0.0175815	0.105312	1.29976	0.0196405	0.120521	FALSE
240	Simple and unspecified goiter	endocrine/metabolic	18	45	0.00731113	0.00421506	1.73993	0.0477563	0.219117	1.72281	0.0566685	0.261547	FALSE
327.3	Sleep apnea	neurological	28	90	0.0113729	0.00843012	1.35309	0.164545	0.508298	1.20348	0.404454	0.887643	FALSE
327	Sleep disorders	neurological	22	58	0.00893582	0.00543275	1.65062	0.0462091	0.212644	1.54511	0.0910213	0.361306	FALSE
514.2	Solitary pulmonary nodule	respiratory	18	19	0.00731113	0.00177969	4.13098	1.68749e-05	0.000255581	4.05671	3.72878e-05	0.00057593	FALSE
772.2	Spasm of muscle	symptoms	23	69	0.009342	0.00646309	1.44964	0.124656	0.428335	1.31229	0.270193	0.711995	FALSE
721.1	Spondylosis without myelopathy	musculoskeletal	30	46	0.0121852	0.00430873	2.85058	8.8559e-06	0.000140971	2.56155	9.48801e-05	0.00132154	FALSE
840	Sprains and strains	injuries & poisonings	73	243	0.0296507	0.0227613	1.31193	0.0449187	0.208145	1.23476	0.127358	0.457783	FALSE
841	Sprains and strains of back and neck	injuries & poisonings	31	82	0.0125914	0.00768078	1.64749	0.0185438	0.109163	1.59687	0.0304626	0.165006	FALSE
41.2	Streptococcus infection	infectious diseases	40	169	0.016247	0.0158299	1.02678	0.881485	0.958804	1.05947	0.748693	1	FALSE
624.9	stress incontinence, female	genitourinary	26	108	0.0105605	0.0101161	1.0444	0.843198	0.958804	0.933785	0.760088	1	FALSE
368.9	Subjective visual disturbances	sense organs	12	32	0.00487409	0.00299738	1.62918	0.150226	0.476327	1.65697	0.146079	0.492843	FALSE
316	Substance addiction and disorders	mental disorders	14	85	0.00568643	0.00796178	0.712582	0.241478	0.674669	0.71531	0.25506	0.690852	FALSE
681	Superficial cellulitis and abscess	dermatologic	25	89	0.0101543	0.00833646	1.2203	0.381416	0.821884	1.25585	0.326155	0.787618	FALSE
915	Superficial injury without mention of infection	injuries & poisonings	25	98	0.0101543	0.00917947	1.10729	0.650845	0.958804	1.09467	0.692476	1	FALSE
381.11	Suppurative and unspecified otitis media	sense organs	25	74	0.0101543	0.00693143	1.46974	0.0975463	0.36318	1.44838	0.119588	0.43588	FALSE
427.61	Supraventricular premature beats	circulatory system	12	24	0.00487409	0.00224803	2.17388	0.0283859	0.1481	2.02557	0.0504622	0.24073	FALSE
771.1	Swelling of limb	symptoms	45	134	0.0182778	0.0125515	1.46472	0.028059	0.147878	1.45727	0.0342124	0.178499	FALSE
293.1	Swelling, mass, or lump in head and neck [Space-occupying lesion, intracranial NOS]	mental disorders	32	99	0.0129976	0.00927314	1.40693	0.0951695	0.356886	1.3646	0.137049	0.478293	FALSE
627.2	Symptomatic menopause	genitourinary	13	12	0.00528026	0.00112402	4.7173	0.000109313	0.00139778	3.98449	0.000982295	0.0105681	FALSE
687	Symptoms affecting skin	dermatologic	20	40	0.00812348	0.00374672	2.17772	0.00462022	0.0353311	2.21636	0.00477775	0.038027	FALSE
741	Symptoms and disorders of the joints	musculoskeletal	31	75	0.0125914	0.0070251	1.80245	0.00606939	0.0428427	1.68332	0.0185561	0.115329	FALSE
429.3	Symptoms involving cardiovascular system	circulatory system	12	56	0.00487409	0.00524541	0.928863	0.816999	0.958804	0.854656	0.629973	1	FALSE
561	Symptoms involving digestive system	digestive	24	80	0.00974817	0.00749344	1.30386	0.25648	0.700716	1.22447	0.395162	0.875644	FALSE
624	Symptoms involving female genital tract	genitourinary	32	77	0.0129976	0.00721244	1.81267	0.00492414	0.036931	1.93854	0.00239782	0.0218512	FALSE
519.9	Symptoms involving respiratory system and other chest symptoms	respiratory	12	24	0.00487409	0.00224803	2.17388	0.0283859	0.1481	2.20748	0.0289188	0.159411	FALSE
772	Symptoms of the muscles	symptoms	12	84	0.00487409	0.00786812	0.617609	0.119367	0.420463	0.600129	0.102995	0.393806	FALSE
788	Syncope and collapse	symptoms	52	187	0.021121	0.0175159	1.21026	0.228274	0.655816	1.24267	0.177439	0.55695	FALSE
727.1	Synovitis and tenosynovitis	musculoskeletal	40	161	0.016247	0.0150806	1.07862	0.670868	0.958804	1.01724	0.924884	1	FALSE
695.42	Systemic lupus erythematosus	dermatologic	13	32	0.00528026	0.00299738	1.76567	0.0845998	0.327483	1.7769	0.0863535	0.34942	FALSE
427.7	Tachycardia NOS	circulatory system	50	252	0.0203087	0.0236043	0.857485	0.325751	0.761426	0.931493	0.655309	1	FALSE
526.41	Temporomandibular joint disorder, unspecified	digestive	10	30	0.00406174	0.00281004	1.44725	0.312266	0.739203	1.77589	0.120504	0.437178	FALSE
306.9	Tension headache	mental disorders	14	52	0.00568643	0.00487074	1.16843	0.606174	0.958804	1.24725	0.47381	0.951278	FALSE
763	Thoracic or lumbosacral neuritis or radiculitis, unspecified	symptoms	21	64	0.00852965	0.00599475	1.42649	0.159459	0.494595	1.33519	0.265947	0.706777	FALSE
636.1	Threatened premature labor	pregnancy complications	52	116	0.021121	0.0108655	1.96423	6.10461e-05	0.000835368	2.10172	1.6444e-05	0.000275835	FALSE
478	Throat pain	respiratory	24	62	0.00974817	0.00580742	1.68525	0.0306527	0.15576	1.75202	0.0238324	0.139769	FALSE
287.3	Thrombocytopenia	hematopoietic	55	338	0.0223396	0.0316598	0.698886	0.0149025	0.0908121	0.675887	0.00881904	0.0636931	FALSE
193	Thyroid cancer	neoplasms	13	39	0.00528026	0.00365305	1.4478	0.249054	0.68402	1.50102	0.212927	0.627914	FALSE
245	Thyroiditis	endocrine/metabolic	10	21	0.00406174	0.00196703	2.06925	0.0588296	0.258809	2.17116	0.0472256	0.228795	FALSE
245.1	Thyroiditis, acute and subacute	endocrine/metabolic	10	12	0.00406174	0.00112402	3.62425	0.00267164	0.0221689	3.3852	0.00517201	0.0405444	FALSE
242	Thyrotoxicosis with or without goiter	endocrine/metabolic	58	121	0.0235581	0.0113338	2.10458	3.96217e-06	6.64621e-05	2.06531	1.10684e-05	0.000191852	FALSE
389.4	Tinnitus	sense organs	21	70	0.00852965	0.00655676	1.30348	0.28872	0.715578	1.35953	0.228329	0.648804	FALSE
318	Tobacco use disorder	mental disorders	23	102	0.009342	0.00955414	0.977586	0.922136	0.958804	1.04298	0.858851	1	FALSE
291.1	Transient mental disorders due to conditions classified elsewhere	mental disorders	12	66	0.00487409	0.00618209	0.787384	0.447395	0.918337	0.776419	0.429146	0.904256	FALSE
250.1	Type 1 diabetes	endocrine/metabolic	12	39	0.00487409	0.00365305	1.33589	0.381438	0.821884	1.28124	0.462163	0.935115	FALSE
250.2	Type 2 diabetes	endocrine/metabolic	84	330	0.0341186	0.0309105	1.10745	0.411608	0.872431	1.12915	0.342308	0.803008	FALSE
663	Umbilical cord complications during labor and delivery	pregnancy complications	110	1863	0.0446791	0.174504	0.221241	1.31247e-50	1.57496e-48	0.229772	1.68963e-47	2.02756e-45	FALSE
709.7	Unspecified diffuse connective tissue disease	dermatologic	20	31	0.00812348	0.00290371	2.81234	0.000325269	0.00352375	2.74824	0.00059601	0.00681066	FALSE
695.9	Unspecified erythematous condition	dermatologic	18	35	0.00731113	0.00327838	2.23916	0.00558942	0.0411297	2.38598	0.00353519	0.0293346	FALSE
599.4	Urinary incontinence	genitourinary	20	95	0.00812348	0.00889846	0.912194	0.709887	0.958804	0.873822	0.592458	1	FALSE
591	Urinary tract infection	genitourinary	223	679	0.0905768	0.0636006	1.46639	2.06685e-06	3.70608e-05	1.49867	9.7814e-07	1.93152e-05	FALSE
947	Urticaria	dermatologic	60	139	0.0243704	0.0130199	1.89357	4.31986e-05	0.000612635	1.96385	2.25086e-05	0.000365765	FALSE
218.1	Uterine leiomyoma	neoplasms	312	1137	0.126726	0.106501	1.21747	0.00392365	0.0307582	1.11029	0.13566	0.476642	FALSE
614.52	Vaginitis and vulvovaginitis	genitourinary	164	369	0.0666125	0.0345635	1.99342	9.45558e-13	2.63405e-11	1.92548	3.63694e-11	9.7821e-10	FALSE
454.1	Varicose veins of lower extremity	circulatory system	10	61	0.00406174	0.00571375	0.709692	0.315862	0.743104	0.652106	0.216451	0.633515	FALSE
671	Venous/cerebrovascular complications embolism in pregnancy and the puerperium	pregnancy complications	55	491	0.0223396	0.045991	0.473987	2.1552e-07	4.3104e-06	0.48082	4.99009e-07	1.01608e-05	FALSE
70.2	Viral hepatitis B	infectious diseases	16	90	0.00649878	0.00843012	0.769401	0.335592	0.77651	0.75853	0.317411	0.779781	FALSE
79	Viral infection	infectious diseases	79	214	0.0320877	0.020045	1.62071	0.00030093	0.00330599	1.60208	0.000556549	0.00643124	FALSE
78	Viral warts & HPV	infectious diseases	94	283	0.0381803	0.0265081	1.45781	0.00187135	0.0161288	1.37118	0.0108398	0.0751557	FALSE
79.9	Viremia, NOS	infectious diseases	26	75	0.0105605	0.0070251	1.50863	0.0721681	0.299185	1.57323	0.051791	0.243803	FALSE
368	Visual disturbances	sense organs	47	119	0.0190902	0.0111465	1.72653	0.00167157	0.0146498	1.71368	0.00249661	0.0223834	FALSE
261.2	Vitamin B-complex deficiencies	endocrine/metabolic	27	52	0.0109667	0.00487074	2.26542	0.000598968	0.00614731	2.18208	0.00146176	0.0142521	FALSE
261.4	Vitamin D deficiency	endocrine/metabolic	249	536	0.101137	0.0502061	2.12859	4.5309e-21	1.96339e-19	2.05018	2.73278e-18	1.09311e-16	FALSE
473.4	Voice disturbance	respiratory	14	39	0.00568643	0.00365305	1.55981	0.154674	0.484877	1.55851	0.16399	0.53408	FALSE
512.1	Wheezing	respiratory	23	54	0.009342	0.00505807	1.85493	0.0134593	0.0843231	1.7742	0.0257394	0.146013	FALSE
442.11	Abdominal aortic aneurysm	circulatory system											TRUE
550	Abdominal hernia	digestive											TRUE
512.3	Abnormal chest sounds	respiratory											TRUE
346	Abnormal findings on study of brain and/or nervous system	neurological											TRUE
429.2	Abnormal function study of cardiovascular system	circulatory system											TRUE
701.5	Abnormal granulation tissue	dermatologic											TRUE
781.2	Abnormal posture	symptoms											TRUE
350.5	Abnormal reflex	neurological											TRUE
589	Abnormal results of function study of kidney	genitourinary											TRUE
514.1	Abnormal results of function study of pulmonary system	respiratory											TRUE
794	Abnormal results of other function studies (bladder, pancreas, placenta, spleen, etc)	symptoms											TRUE
609.2	Abnormal spermatozoa	genitourinary											TRUE
516	Abnormal sputum	respiratory											TRUE
350.2	Abnormality of gait	neurological											TRUE
289.9	Abnormality of red blood cells	hematopoietic											TRUE
614.54	Abscess or ulceration of vulva	genitourinary											TRUE
276.4	Acid-base balance disorder	endocrine/metabolic											TRUE
276.41	Acidosis	endocrine/metabolic											TRUE
175	Acquired absence of breast	neoplasms											TRUE
701.6	Acquired acanthosis nigricans	dermatologic											TRUE
286.4	Acquired coagulation factor deficiency	hematopoietic											TRUE
736.2	Acquired deformities of finger	musculoskeletal											TRUE
736.1	Acquired deformities of forearm	musculoskeletal											TRUE
736.3	Acquired deformities of hip	musculoskeletal											TRUE
736.5	Acquired deformities of knee	musculoskeletal											TRUE
735	Acquired foot deformities	musculoskeletal											TRUE
283	Acquired hemolytic anemias	hematopoietic											TRUE
738.4	Acquired spondylolisthesis	musculoskeletal											TRUE
735.2	Acquired toe deformities	musculoskeletal											TRUE
253.11	Acromegaly and gigantism	endocrine/metabolic											TRUE
702.1	Actinic keratosis	dermatologic											TRUE
323.2	Acute (transverse) myelitis	neurological											TRUE
474	Acute and chronic tonsillitis	respiratory											TRUE
573.4	Acute and subacute necrosis of liver	digestive											TRUE
540.11	Acute appendicitis	digestive											TRUE
938.1	Acute dermatitis due to solar radiation	dermatologic											TRUE
446.2	Acute febrile mucocutaneous lymph node syndrome (Kawasaki disease)	circulatory system											TRUE
81.11	Acute graft-versus-host disease	infectious diseases											TRUE
614.31	Acute inflammatory pelvic disease	genitourinary											TRUE
465.4	Acute laryngitis and tracheitis	respiratory											TRUE
710.11	Acute osteomyelitis	musculoskeletal											TRUE
577.1	Acute pancreatitis	digestive											TRUE
420.21	Acute pericarditis	circulatory system											TRUE
523.31	Acute periodontitis	digestive											TRUE
585.1	Acute renal failure	genitourinary											TRUE
394.4	Acute rheumatic heart disease	circulatory system											TRUE
474.1	Acute tonsillitis	respiratory											TRUE
441.1	Acute vascular insufficiency of intestine	circulatory system											TRUE
255.1	Adrenal hyperfunction	endocrine/metabolic											TRUE
255.3	Adrenogenital disorders	endocrine/metabolic											TRUE
260.3	Adult failure to thrive	endocrine/metabolic											TRUE
979	Adverse drug events and drug allergies	injuries & poisonings											TRUE
967	Adverse effects of sedatives or other central nervous system depressants and anesthetics	injuries & poisonings											TRUE
317	Alcohol-related disorders	mental disorders											TRUE
276.42	Alkalosis	endocrine/metabolic											TRUE
930	Allergic reaction to food	injuries & poisonings											TRUE
704.11	Alopecia Areata	dermatologic											TRUE
270.34	Alpha-1-antitrypsin deficiency	endocrine/metabolic											TRUE
291.8	Alteration of consciousness	mental disorders											TRUE
292.4	Altered mental status	mental disorders											TRUE
368.1	Amblyopia	sense organs											TRUE
270.33	Amyloidosis	endocrine/metabolic											TRUE
565.1	Anal and rectal polyp	digestive											TRUE
946	Anaphylactic shock NOS	injuries & poisonings											TRUE
285.21	Anemia in chronic kidney disease	hematopoietic											TRUE
285.22	Anemia in neoplastic disease	hematopoietic											TRUE
285.2	Anemia of chronic disease	hematopoietic											TRUE
411.41	Aneurysm and dissection of heart	circulatory system											TRUE
442.3	Aneurysm of artery of lower extremity	circulatory system											TRUE
442.2	Aneurysm of iliac artery	circulatory system											TRUE
442.8	Aneurysm of other specified artery	circulatory system											TRUE
411.3	Angina pectoris	circulatory system											TRUE
556.11	Angiodysplasia of intestine (without mention of hemorrhage)	digestive											TRUE
368.3	Anisometropia	sense organs											TRUE
715.2	Ankylosing spondylitis	musculoskeletal											TRUE
741.1	Ankylosis of joint	musculoskeletal											TRUE
759.1	Anomalies of endocrine glands, congenital	congenital anomalies											TRUE
526.3	Anomalies of jaw size/symmetry	digestive											TRUE
379.4	Anomalies of pupillary function	sense organs											TRUE
748	Anomalies of respiratory system, congenital	congenital anomalies											TRUE
524.3	Anomalies of tooth position/malocclusion	digestive											TRUE
426.4	Anomalous atrioventricular excitation	circulatory system											TRUE
260.6	Anorexia	endocrine/metabolic											TRUE
305.21	Anorexia nervosa	mental disorders											TRUE
334.2	Anterior horn cell disease	neurological											TRUE
253.4	Anterior pituitary disorders	endocrine/metabolic											TRUE
964.1	Anticoagulants causing adverse effects	injuries & poisonings											TRUE
963.1	Antineoplastic and immunosuppressive drugs causing adverse effects	injuries & poisonings											TRUE
965.2	Antirheumatics causing adverse effects in therapeutic use	injuries & poisonings											TRUE
301.2	Antisocial/borderline personality disorder	mental disorders											TRUE
300	Anxiety disorders	mental disorders											TRUE
442.1	Aortic aneurysm	circulatory system											TRUE
447.7	Aortic ectasia	circulatory system											TRUE
394.3	Aortic valve disease	circulatory system											TRUE
379.3	Aphakia and other disorders of lens	sense organs											TRUE
292.11	Aphasia	mental disorders											TRUE
292.1	Aphasia/speech disturbance	mental disorders											TRUE
284	Aplastic anemia	hematopoietic											TRUE
513.31	Apnea	respiratory											TRUE
540	Appendiceal conditions	digestive											TRUE
540.1	Appendicitis	digestive											TRUE
442.4	Arterial dissection	circulatory system											TRUE
444	Arterial embolism and thrombosis	circulatory system											TRUE
444.1	Arterial embolism and thrombosis of lower extremity artery	circulatory system											TRUE
446.9	Arteritis NOS	circulatory system											TRUE
711	Arthropathy associated with infections	musculoskeletal											TRUE
713	Arthropathy associated with other disorders classified elsewhere	musculoskeletal											TRUE
716.9	Arthropathy NOS	musculoskeletal											TRUE
133	Arthropod-borne diseases	infectious diseases											TRUE
742.8	Articular cartilage disorder	musculoskeletal											TRUE
733.4	Aseptic necrosis of bone	musculoskeletal											TRUE
117.4	Aspergillosis	infectious diseases											TRUE
1013	Asphyxia and hypoxemia	NULL											TRUE
440.9	Atherosclerosis of aorta	circulatory system											TRUE
440.22	Atherosclerosis of native arteries of the extremities with intermittent claudication	circulatory system											TRUE
440.1	Atherosclerosis of renal artery	circulatory system											TRUE
440.2	Atherosclerosis of the extremities	circulatory system											TRUE
427.21	Atrial fibrillation	circulatory system											TRUE
427.22	Atrial flutter	circulatory system											TRUE
426.2	Atrioventricular [AV] block	circulatory system											TRUE
426.24	Atrioventricular block, complete	circulatory system											TRUE
525.2	Atrophy of edentulous alveolar ridge	digestive											TRUE
624.2	Atrophy of female genital tract	genitourinary											TRUE
313.3	Autism	mental disorders											TRUE
279.2	Autoimmune disease NEC	endocrine/metabolic											TRUE
283.1	Autoimmune hemolytic anemias	hematopoietic											TRUE
609.11	Azoospermia and oligospermia	genitourinary											TRUE
38.3	Bacteremia	infectious diseases											TRUE
480.1	Bacterial pneumonia	respiratory											TRUE
539	Bariatric surgery	digestive											TRUE
530.13	Barrett's esophagus	digestive											TRUE
711.3	Behcet's syndrome	musculoskeletal											TRUE
227.1	Benign neoplasm of adrenal gland	neoplasms											TRUE
213	Benign neoplasm of bone and articular cartilage	neoplasms											TRUE
225.1	Benign neoplasm of brain, cranial nerves, meninges	neoplasms											TRUE
224	Benign neoplasm of eye	neoplasms											TRUE
224.1	Benign neoplasm of eye, uveal	neoplasms											TRUE
223	Benign neoplasm of kidney and other urinary organs	neoplasms											TRUE
210	Benign neoplasm of lip, oral cavity, and pharynx	neoplasms											TRUE
229.1	Benign neoplasm of lymph nodes	neoplasms											TRUE
221	Benign neoplasm of other female genital organs	neoplasms											TRUE
211	Benign neoplasm of other parts of digestive system	neoplasms											TRUE
212	Benign neoplasm of respiratory and intrathoracic organs	neoplasms											TRUE
225.2	Benign neoplasm of spinal cord, meninges	neoplasms											TRUE
226	Benign neoplasm of thyroid glands	neoplasms											TRUE
229	Benign neoplasm of unspecified sites	neoplasms											TRUE
367.9	Blindness and low vision	sense organs											TRUE
911	Blister	injuries & poisonings											TRUE
170.1	Bone cancer	neoplasms											TRUE
860	Bone marrow or stem cell transplant	neoplasms											TRUE
174.1	Breast cancer [female]	neoplasms											TRUE
174.2	Breast cancer [male]	neoplasms											TRUE
613.9	Breast disorder NOS	genitourinary											TRUE
873	Broken tooth	injuries & poisonings											TRUE
496.3	Bronchiectasis	respiratory											TRUE
480.5	Bronchopneumonia and lung abscess	respiratory											TRUE
426.3	Bundle branch block	circulatory system											TRUE
1000	Burns	NULL											TRUE
727.2	Bursitis disorders	musculoskeletal											TRUE
260.1	Cachexia	endocrine/metabolic											TRUE
726.4	Calcaneal spur; Exostosis NOS	musculoskeletal											TRUE
594.3	Calculus of ureter	genitourinary											TRUE
189.2	Cancer of bladder	neoplasms											TRUE
191.11	Cancer of brain	neoplasms											TRUE
170.2	Cancer of connective tissue	neoplasms											TRUE
164	Cancer of intrathoracic organs	neoplasms											TRUE
149.4	Cancer of larynx	neoplasms											TRUE
145.3	Cancer of major salivary glands	neoplasms											TRUE
149.2	Cancer of nasopharynx	neoplasms											TRUE
194	Cancer of other endocrine glands	neoplasms											TRUE
184	Cancer of other female genital organs	neoplasms											TRUE
184.2	Cancer of other female genital organs (excluding uterus and ovary)	neoplasms											TRUE
202	Cancer of other lymphoid, histiocytic tissue	neoplasms											TRUE
151	Cancer of stomach	neoplasms											TRUE
165	Cancer within the respiratory system	neoplasms											TRUE
195	Cancer, suspected or other	neoplasms											TRUE
112.3	Candidiasis of skin and nails	infectious diseases											TRUE
259.2	Carcinoid syndrome	endocrine/metabolic											TRUE
172.3	Carcinoma in situ of skin	neoplasms											TRUE
427.42	Cardiac arrest	circulatory system											TRUE
429.9	Cardiac complications, not elsewhere classified	circulatory system											TRUE
426	Cardiac conduction disorders	circulatory system											TRUE
797.1	Cardiogenic shock	symptoms											TRUE
416	Cardiomegaly	circulatory system											TRUE
347	Cataplexy and narcolepsy	neurological											TRUE
366	Cataract	sense organs											TRUE
681.3	Cellulitis and abscess of arm/hand	dermatologic											TRUE
681.2	Cellulitis and abscess of face/neck	dermatologic											TRUE
681.6	Cellulitis and abscess of foot, toe	dermatologic											TRUE
528.3	Cellulitis and abscess of oral soft tissues	digestive											TRUE
386.21	Central origin vertigo	sense organs											TRUE
327.31	Central/nonobstroctive sleep apnea	neurological											TRUE
433.5	Cerebral aneurysm	circulatory system											TRUE
433.21	Cerebral artery occlusion, with cerebral infarction	circulatory system											TRUE
433.12	Cerebral atherosclerosis	circulatory system											TRUE
348.4	Cerebral cysts	neurological											TRUE
331.9	Cerebral degeneration, unspecified	neurological											TRUE
348.2	Cerebral edema and compression of brain	neurological											TRUE
433.3	Cerebral ischemia	circulatory system											TRUE
816	Cerebral laceration and contusion	injuries & poisonings											TRUE
433	Cerebrovascular disease	circulatory system											TRUE
958	Certain early complications of trauma or procedure	injuries & poisonings											TRUE
180.1	Cervical cancer	neoplasms											TRUE
767	Cervicocranial/Cervicobrachial syndrome	symptoms											TRUE
687.3	Changes in skin texture	dermatologic											TRUE
197	Chemotherapy	neoplasms											TRUE
575.1	Cholangitis	digestive											TRUE
574.3	Cholecystitis without cholelithiasis	digestive											TRUE
574.11	Cholelithiasis with acute cholecystitis	digestive											TRUE
385.3	Cholesteatoma	sense organs											TRUE
733.9	Chondromalacia	musculoskeletal											TRUE
363	Chorioretinal inflammations, scars, and other disorders of choroid	sense organs											TRUE
363.3	Chorioretinal scars	sense organs											TRUE
758	Chromosomal anomalies and genetic disorders	congenital anomalies											TRUE
496	Chronic airway obstruction	respiratory											TRUE
496.2	Chronic bronchitis	respiratory											TRUE
592.12	Chronic cystitis	genitourinary											TRUE
938.2	Chronic dermatitis due to solar radiation	dermatologic											TRUE
798.1	Chronic fatigue syndrome	symptoms											TRUE
580.14	Chronic glomerulonephritis, NOS	genitourinary											TRUE
81.12	Chronic graft-versus-host disease	infectious diseases											TRUE
70.4	Chronic hepatitis	infectious diseases											TRUE
371.9	Chronic inflammatory disorders of orbit	sense organs											TRUE
592.13	Chronic interstitial cystitis	genitourinary											TRUE
585.4	Chronic kidney disease, Stage I or II	genitourinary											TRUE
585.33	Chronic Kidney Disease, Stage III	genitourinary											TRUE
585.34	Chronic Kidney Disease, Stage IV	genitourinary											TRUE
473.1	Chronic laryngitis	respiratory											TRUE
495.1	Chronic obstructive asthma	respiratory											TRUE
710.12	Chronic osteomyelitis	musculoskeletal											TRUE
355.1	Chronic pain syndrome	neurological											TRUE
577.2	Chronic pancreatitis	digestive											TRUE
573.1	Chronic passive congestion of liver	digestive											TRUE
420.22	Chronic pericarditis	circulatory system											TRUE
523.32	Chronic periodontitis	digestive											TRUE
415.2	Chronic pulmonary heart disease	circulatory system											TRUE
585.3	Chronic renal failure [CKD]	genitourinary											TRUE
245.2	Chronic thyroiditis	endocrine/metabolic											TRUE
707.2	Chronic ulcer of leg or foot	dermatologic											TRUE
707.3	Chronic ulcer of unspecified site	dermatologic											TRUE
456	Chronic venous insufficiency [CVI]	circulatory system											TRUE
327.6	Circadian rhythm sleep disorder	neurological											TRUE
459.9	Circulatory disease NEC	circulatory system											TRUE
701.3	Circumscribed scleroderma	dermatologic											TRUE
571.51	Cirrhosis of liver without mention of alcohol	digestive											TRUE
749.1	Cleft palate	congenital anomalies											TRUE
117.2	Coccidioidomycosis	infectious diseases											TRUE
803.21	Colles' fracture	injuries & poisonings											TRUE
153.2	Colon cancer	neoplasms											TRUE
368.5	Color vision deficiencies	sense organs											TRUE
348.7	Coma	neurological											TRUE
355	Complex regional/central pain syndrome	neurological											TRUE
859	Complication due to other implant and internal device	injuries & poisonings											TRUE
858	Complication of internal orthopedic device	injuries & poisonings											TRUE
855	Complication of nervous system device, implant, and graft	injuries & poisonings											TRUE
639	Complications following abortion or ectopic and molar pregnancies	pregnancy complications											TRUE
854	Complications of cardiac/vascular device, implant, and graft	injuries & poisonings											TRUE
536.7	Complications of gastrostomy, colostomy and enterostomy	digestive											TRUE
679	Complications of in utero procedures	pregnancy complications											TRUE
668	Complications of the administration of anesthetic or other sedation in labor and delivery	pregnancy complications											TRUE
851	Complications of transplants and reattached limbs	injuries & poisonings											TRUE
817	Concussion	injuries & poisonings											TRUE
656.7	Conditions involving the integument and temperature regulation of fetus and newborn	pregnancy complications											TRUE
389.2	Conductive hearing loss	sense organs											TRUE
756.1	Congenital anomalies of abdominal wall; diaphram	congenital anomalies											TRUE
612.3	Congenital anomalies of breast	genitourinary											TRUE
749	Congenital anomalies of face and neck	congenital anomalies											TRUE
751.1	Congenital anomalies of genital organs	congenital anomalies											TRUE
747.13	Congenital anomalies of great vessels	congenital anomalies											TRUE
750.21	Congenital anomalies of intestine	congenital anomalies											TRUE
755	Congenital anomalies of limbs	congenital anomalies											TRUE
751.12	Congenital anomalies of male genital organs	congenital anomalies											TRUE
750.13	Congenital anomalies of mouth/tongue	congenital anomalies											TRUE
756.3	Congenital anomalies of muscle, tendon, fascia, and connective tissue	congenital anomalies											TRUE
747.2	Congenital anomalies of peripheral vascular system	congenital anomalies											TRUE
753.2	Congenital anomalies of posterior segment of eye	congenital anomalies											TRUE
749.2	Congenital anomalies of skull and face bones	congenital anomalies											TRUE
750.15	Congenital anomalies of stomach	congenital anomalies											TRUE
753	Congenital anomalies of the eye	congenital anomalies											TRUE
757	Congenital anomalies of the integument	congenital anomalies											TRUE
755.4	Congenital anomalies of upper limb, including shoulder girdle	congenital anomalies											TRUE
751.2	Congenital anomalies of urinary system	congenital anomalies											TRUE
755.3	Congenital anomaly of fingers/toes	congenital anomalies											TRUE
750.22	Congenital anomaly of gallbladder, bile ducts, liver, pancreas	congenital anomalies											TRUE
753.1	Congenital cataract and lens anomalies	congenital anomalies											TRUE
286.1	Congenital coagulation defects	hematopoietic											TRUE
286.12	Congenital deficiency of other clotting factors (including factor VII)	hematopoietic											TRUE
755.1	Congenital deformities of feet	congenital anomalies											TRUE
286.13	Congenital factor VIII disorder	hematopoietic											TRUE
755.61	Congenital hip dysplasia and deformity	congenital anomalies											TRUE
244.5	Congenital hypothyroidism	endocrine/metabolic											TRUE
754	Congenital musculoskeletal deformities of spine	congenital anomalies											TRUE
756.5	Congenital osteodystrophies	congenital anomalies											TRUE
691.3	Congenital pigmentary anomalies of skin	dermatologic											TRUE
428.1	Congestive heart failure (CHF) NOS	circulatory system											TRUE
371.2	Conjunctivitis, noninfectious	sense organs											TRUE
284.2	Constitutional aplastic anemia	hematopoietic											TRUE
939.1	Contact and allergic dermatitis of eyelid	dermatologic											TRUE
931	Contact dermatitis and other eczema due to plants [except food]	dermatologic											TRUE
739	Contracture of joint	musculoskeletal											TRUE
728.71	Contracture of palmar fascia [Dupuytren's disease]	musculoskeletal											TRUE
364.9	Cornea replaced by transplant	sense organs											TRUE
364.4	Corneal degenerations	sense organs											TRUE
364.5	Corneal dystrophy	sense organs											TRUE
364.1	Corneal opacity	sense organs											TRUE
364	Corneal opacity and other disorders of cornea	sense organs											TRUE
370.1	Corneal ulcer	sense organs											TRUE
411.4	Coronary atherosclerosis	circulatory system											TRUE
733.6	Costochondritis	musculoskeletal											TRUE
771.2	Cramp of limb	symptoms											TRUE
1006	Crushing injury	NULL											TRUE
1008	Crushing or internal injury to organs	NULL											TRUE
737	Curvature of spine	musculoskeletal											TRUE
255.11	Cushing's syndrome	endocrine/metabolic											TRUE
695.41	Cutaneous lupus erythematosus	dermatologic											TRUE
577.3	Cyst and pseudocyst of pancreas	digestive											TRUE
733.2	Cyst of bone	musculoskeletal											TRUE
586.2	Cyst of kidney, acquired	genitourinary											TRUE
528.41	Cyst of the salivary gland	digestive											TRUE
614.53	Cyst or abscess of Bartholin's gland	genitourinary											TRUE
499	Cystic fibrosis	respiratory											TRUE
751.21	Cystic kidney disease	congenital anomalies											TRUE
362.23	Cystoid macular degeneration of retina	sense organs											TRUE
526.1	Cysts of the jaws	digestive											TRUE
799	Debility unspecified	symptoms											TRUE
302.1	Decreased libido	mental disorders											TRUE
288.1	Decreased white blood cell count	hematopoietic											TRUE
707.1	Decubitus ulcer	dermatologic											TRUE
286.6	Defibrination syndrome	hematopoietic											TRUE
281.9	Deficiency anemias	hematopoietic											TRUE
279.11	Deficiency of humoral immunity	endocrine/metabolic											TRUE
389.3	Degenerative and vascular disorders of ear	sense organs											TRUE
334	Degenerative disease of the spinal cord	neurological											TRUE
702.4	Degenerative skin disorders	dermatologic											TRUE
290	Delirium dementia and amnestic and other cognitive disorders	mental disorders											TRUE
290.2	Delirium due to conditions classified elsewhere	mental disorders											TRUE
521.1	Dental caries	digestive											TRUE
524	Dentofacial anomalies, including malocclusion	digestive											TRUE
509.8	Dependence on respirator [Ventilator] or supplemental oxygen	respiratory											TRUE
742	Derangement of joint, non-traumatic	musculoskeletal											TRUE
938	Dermatitis due to solar radiation	dermatologic											TRUE
695.21	Dermatitis herpetiformis	dermatologic											TRUE
374.6	Dermatochalasis	sense organs											TRUE
709.5	Dermatomyositis	dermatologic											TRUE
110.1	Dermatophytosis	infectious diseases											TRUE
315	Develomental delays and disorders	mental disorders											TRUE
253.3	Diabetes insipidus	endocrine/metabolic											TRUE
250	Diabetes mellitus	endocrine/metabolic											TRUE
250.25	Diabetes type 2 with peripheral circulatory disorders	endocrine/metabolic											TRUE
250.7	Diabetic retinopathy	endocrine/metabolic											TRUE
550.2	Diaphragmatic hernia	digestive											TRUE
741.3	Difficulty in walking	musculoskeletal											TRUE
368.2	Diplopia and disorders of binocular vision	sense organs											TRUE
448	Disease of capillaries	circulatory system											TRUE
394.7	Disease of tricuspid valve	circulatory system											TRUE
529	Diseases and other conditions of the tongue	digestive											TRUE
31	Diseases due to other mycobacteria	infectious diseases											TRUE
530	Diseases of esophagus	digestive											TRUE
521	Diseases of hard tissues of teeth	digestive											TRUE
528.5	Diseases of lips	digestive											TRUE
577	Diseases of pancreas	digestive											TRUE
522	Diseases of pulp and periapical tissues	digestive											TRUE
706	Diseases of sebaceous glands	dermatologic											TRUE
289.5	Diseases of spleen	hematopoietic											TRUE
473	Diseases of the larynx and vocal cords	respiratory											TRUE
527	Diseases of the salivary glands	digestive											TRUE
254	Diseases of thymus gland	endocrine/metabolic											TRUE
288	Diseases of white blood cells	hematopoietic											TRUE
279	Disorders involving the immune mechanism	endocrine/metabolic											TRUE
368.7	Disorders of accommodation	sense organs											TRUE
389.5	Disorders of acoustic nerve	sense organs											TRUE
255	Disorders of adrenal glands	endocrine/metabolic											TRUE
270.2	Disorders of amino-acid metabolism	endocrine/metabolic											TRUE
724.2	Disorders of coccyx	musculoskeletal											TRUE
275.2	Disorders of copper metabolism	endocrine/metabolic											TRUE
513.8	Disorders of diaphragm	respiratory											TRUE
530.5	Disorders of esophageal motility	digestive											TRUE
380	Disorders of external ear	sense organs											TRUE
379.5	Disorders of iris and ciliary body	sense organs											TRUE
275.1	Disorders of iron metabolism	hematopoietic											TRUE
375	Disorders of lacrimal system	sense organs											TRUE
275.3	Disorders of magnesium metabolism	endocrine/metabolic											TRUE
275	Disorders of mineral metabolism	endocrine/metabolic											TRUE
377	Disorders of optic nerve and visual pathways	sense organs											TRUE
352	Disorders of other cranial nerves	neurological											TRUE
275.53	Disorders of phosphorus metabolism	endocrine/metabolic											TRUE
367	Disorders of refraction and accommodation; blindness and low vision	sense organs											TRUE
724.1	Disorders of sacrum	musculoskeletal											TRUE
705	Disorders of sweat glands	dermatologic											TRUE
337	Disorders of the autonomic nervous system	neurological											TRUE
376	Disorders of the orbit	sense organs											TRUE
253	Disorders of the pituitary gland and its hypothalamic control	endocrine/metabolic											TRUE
270.21	Disorders of urea cycle metabolism	endocrine/metabolic											TRUE
588	Disorders resulting from impaired renal function	genitourinary											TRUE
303.1	Dissociative disorder	mental disorders											TRUE
527.7	Disturbance of salivary secretion	digestive											TRUE
520.2	Disturbances in tooth eruption	digestive											TRUE
562.2	Diverticulitis	digestive											TRUE
562.1	Diverticulosis	digestive											TRUE
362.27	Drusen (degenerative) of retina	sense organs											TRUE
531.3	Duodenal ulcer	digestive											TRUE
535.6	Duodenitis	digestive											TRUE
620	Dysplasia of female genital organs	genitourinary											TRUE
624.1	Dystrophy of female genital tract	genitourinary											TRUE
41.4	E. coli	infectious diseases											TRUE
305.2	Eating disorder	mental disorders											TRUE
634.3	Ectopic pregnancy	pregnancy complications											TRUE
374.1	Ectropion or entropion	sense organs											TRUE
1014	Effects of heat, cold and air pressure	NULL											TRUE
990	Effects radiation NOS	injuries & poisonings											TRUE
276.1	Electrolyte imbalance	endocrine/metabolic											TRUE
790.8	Elevated C-reactive protein (CRP)	symptoms											TRUE
795.82	Elevated cancer antigen 125 [CA 125]	symptoms											TRUE
790.1	Elevated sedimentation rate	symptoms											TRUE
496.1	Emphysema	respiratory											TRUE
506	Empyema and pneumothorax	respiratory											TRUE
323	Encephalitis	neurological											TRUE
323.8	Encephalitis, non-infectious	neurological											TRUE
348.8	Encephalopathy, not elsewhere classified	neurological											TRUE
585.32	End stage renal disease	genitourinary											TRUE
420.3	Endocarditis	circulatory system											TRUE
656.3	Endocrine and metabolic disturbances of fetus and newborn	pregnancy complications											TRUE
621	Endometrial hyperplasia	genitourinary											TRUE
288.3	Eosinophilia	hematopoietic											TRUE
530.15	Eosinophilic esophagitis	digestive											TRUE
345.1	Epilepsy	neurological											TRUE
375.2	Epiphora	sense organs											TRUE
605	Erectile dysfunction [ED]	genitourinary											TRUE
695.81	Erythema nodosum	dermatologic											TRUE
690	Erythematosquamous dermatosis	dermatologic											TRUE
750.11	Esophageal atresia/tracheoesophageal fistula	congenital anomalies											TRUE
530.2	Esophageal bleeding (varices/hemorrhage)	digestive											TRUE
530.1	Esophagitis, GERD and related diseases	digestive											TRUE
333.1	Essential tremor	neurological											TRUE
242.3	Exophthalmos	endocrine/metabolic											TRUE
526.8	Exostosis of jaw	digestive											TRUE
333	Extrapyramidal disease and abnormal movement disorders	neurological											TRUE
352.2	Facial nerve disorders [CN7]	neurological											TRUE
772.6	Facial weakness	symptoms											TRUE
264.2	Failure to thrive (childhood)	endocrine/metabolic											TRUE
610.2	Fibroadenosis of breast	genitourinary											TRUE
610.3	Fibrosclerosis of breast	genitourinary											TRUE
426.21	First degree AV block	circulatory system											TRUE
735.1	Flat foot	musculoskeletal											TRUE
276.6	Fluid overload	endocrine/metabolic											TRUE
803.3	Fracture of clavicle or scapula	injuries & poisonings											TRUE
804	Fracture of hand or wrist	injuries & poisonings											TRUE
803.1	Fracture of humerus	injuries & poisonings											TRUE
800	Fracture of lower limb	injuries & poisonings											TRUE
800.1	Fracture of neck of femur	injuries & poisonings											TRUE
800.4	Fracture of patella	injuries & poisonings											TRUE
802	Fracture of pelvis	injuries & poisonings											TRUE
803.2	Fracture of radius and ulna	injuries & poisonings											TRUE
807	Fracture of ribs	injuries & poisonings											TRUE
800.3	Fracture of tibia and fibula	injuries & poisonings											TRUE
809	Fracture of unspecified bones	injuries & poisonings											TRUE
800.2	Fracture of unspecified part of femur	injuries & poisonings											TRUE
803	Fracture of upper limb	injuries & poisonings											TRUE
805	Fracture of vertebral column without mention of spinal cord injury	injuries & poisonings											TRUE
564	Functional digestive disorders	digestive											TRUE
596.5	Functional disorders of bladder	genitourinary											TRUE
791	Gangrene	symptoms											TRUE
531.2	Gastric ulcer	digestive											TRUE
530.7	Gastroesophageal laceration-hemorrhage syndrome	digestive											TRUE
569.2	Gastrointestinal complications	digestive											TRUE
303.31	Gastrointestinal malfunction arising from mental factors	mental disorders											TRUE
531.5	Gastrojejunal ulcer	digestive											TRUE
536.3	Gastroparesis	digestive											TRUE
345.11	Generalized convulsive epilepsy	neurological											TRUE
618	Genital prolapse	genitourinary											TRUE
736.4	Genu valgum or varum (acquired)	musculoskeletal											TRUE
446.5	Giant cell arteritis	circulatory system											TRUE
[truncated: 614 more rows]

## Sheet: Stanford utilization results
phecode	phenotype	category	rpl_count	control_count	rpl_prop	control_prop	odds_ratio_w_hu	p_value_w_hu	adj_p_value_w_hu	count_under10
[truncated: 1,662 more rows]
